# Supplementary material for: Coupling Mixed Mode Chromatography/ESI Negative MS Detection with Message-Passing Neural Network Modeling for Enhanced Metabolome Coverage and Structural Identification
Source: MDPI journal article supplement (doi:10.3390/metabo11110772), 2021-11-11
Supplement: s1 [file s1]

**Table S1, see excel file**

**Table S2:** Performance of assorted machine learning methods on the elution data set in 5-fold cross validation. The MPNN performs better than Linear Regression and Random Forest (applied to hand-selected features) on both measures: RMSE and the % of overall predictions with an error of less than 2 minutes.

| Method            | Features                                                                                                                                                              | Mean (STD)<br>RMSE on test<br>dataset | Mean (STD)<br>% of training +<br>test<br>predictions<br>with error $\leq$ 2<br>minutes |
|-------------------|-----------------------------------------------------------------------------------------------------------------------------------------------------------------------|---------------------------------------|----------------------------------------------------------------------------------------|
| Linear Regression | Number of basic centers, number of acidic centers, radius of gyration, total polar surface area, total atom information content <sup>1</sup> , total heavy atom bonds | 4.68 (3.15)                           | 78.8                                                                                   |
| Random Forest     |                                                                                                                                                                       | 4.88 (2.72)                           | 85.4                                                                                   |
| <b>MPNN</b>       | <b>Weave Features</b>                                                                                                                                                 | <b>4.62 (0.7)</b>                     | <b>91.2</b>                                                                            |

**Table S3:** The effect  $\sum \epsilon_i$  of various subgraphs (with fewer than 6 atoms) to the elution time. Only subgraphs that occur more than 30 times in the entire dataset are included. Aromatic ring fragments are excluded.

| Subgraph       | Mean Total Effect (min) | Mean Absolute Effect (min) | Mean Relative Effect | Mean Absolute Relative Effect | Frequency | Annotation |
|----------------|-------------------------|----------------------------|----------------------|-------------------------------|-----------|------------|
| <b>C=CCCC</b>  | -7.42                   | 9.52                       | -2.83                | 2.98                          | 33        |            |
| <b>CC=CCC</b>  | -5.96                   | 8.10                       | -2.37                | 2.52                          | 48        |            |
| <b>CC(C)CO</b> | -9.96                   | 11.31                      | -2.28                | 2.34                          | 37        |            |
| <b>cccC=O</b>  | -7.01                   | 12.72                      | -1.95                | 2.31                          | 52        |            |
| <b>CCNCC</b>   | -9.39                   | 10.83                      | -1.88                | 1.95                          | 61        |            |
| <b>cccCO</b>   | -4.08                   | 14.45                      | -1.75                | 2.34                          | 46        |            |
| <b>C=CCC</b>   | -4.89                   | 6.00                       | -1.73                | 1.81                          | 45        |            |
| <b>C1CCOC1</b> | -11.15                  | 12.07                      | -1.68                | 1.71                          | 54        |            |

<sup>1</sup> As defined by a\_IC at <https://www.chemcomp.com/journal/descr.htm>

|                  |              |             |              |             |           |                        |
|------------------|--------------|-------------|--------------|-------------|-----------|------------------------|
| <b>C(Cn)CO</b>   | -9.88        | 11.12       | -1.62        | 1.65        | 50        |                        |
| <b>CCCNC</b>     | -7.72        | 9.81        | -1.60        | 1.68        | 46        |                        |
| <b>CC(=O)NC</b>  | <b>-6.81</b> | <b>9.99</b> | <b>-1.57</b> | <b>1.71</b> | <b>32</b> | <b>Amide</b>           |
| <b>CCC(n)O</b>   | -10.12       | 11.35       | -1.56        | 1.59        | 49        |                        |
| <b>CC(n)OC</b>   | -9.97        | 11.18       | -1.55        | 1.58        | 49        |                        |
| <b>CC(=O)N</b>   | -6.69        | 9.02        | -1.54        | 1.64        | 34        |                        |
| <b>CC(Cn)O</b>   | -9.41        | 10.64       | -1.54        | 1.57        | 38        |                        |
| <b>CCOCn</b>     | -9.89        | 11.05       | -1.53        | 1.56        | 98        |                        |
| <b>CC(nc)O</b>   | -9.56        | 11.12       | -1.52        | 1.56        | 98        |                        |
| <b>COCnc</b>     | -9.35        | 10.91       | -1.50        | 1.54        | 98        |                        |
| <b>CC(C)NC</b>   | -8.43        | 8.89        | -1.49        | 1.52        | 33        |                        |
| <b>cnCCO</b>     | -8.82        | 10.35       | -1.48        | 1.52        | 76        |                        |
| <b>cn(c)CO</b>   | -8.93        | 10.81       | -1.47        | 1.52        | 49        |                        |
| <b>ccCO</b>      | -3.46        | 11.71       | -1.42        | 1.91        | 52        |                        |
| <b>C(ncn)O</b>   | -7.23        | 9.86        | -1.42        | 1.48        | 74        |                        |
| <b>CNCC=O</b>    | -6.39        | 8.94        | -1.41        | 1.54        | 44        |                        |
| <b>CCNC</b>      | -7.28        | 8.47        | -1.37        | 1.43        | 124       |                        |
| <b>ccnCO</b>     | -8.27        | 10.33       | -1.36        | 1.41        | 52        |                        |
| <b>ccC=O</b>     | -4.63        | 9.31        | -1.32        | 1.63        | 59        |                        |
| <b>C(C(n)O)O</b> | -7.39        | 8.87        | -1.29        | 1.32        | 37        |                        |
| <b>CC(n)O</b>    | -7.81        | 8.94        | -1.25        | 1.27        | 49        |                        |
| <b>CCC(C)O</b>   | -6.88        | 8.15        | -1.24        | 1.29        | 691       |                        |
| <b>CCNC=O</b>    | -5.92        | 7.94        | -1.22        | 1.32        | 68        |                        |
| <b>COCn</b>      | -7.61        | 8.73        | -1.22        | 1.25        | 49        |                        |
| <b>CCCC=O</b>    | -3.27        | 8.72        | -1.22        | 1.45        | 211       |                        |
| <b>CC(C=O)O</b>  | -1.65        | 10.77       | -1.20        | 1.51        | 47        |                        |
| <b>cnCO</b>      | -7.19        | 8.68        | -1.20        | 1.23        | 98        |                        |
| <b>C(CO)n</b>    | -6.87        | 7.97        | -1.18        | 1.21        | 38        |                        |
| <b>CC(C)OC</b>   | -7.68        | 8.70        | -1.18        | 1.21        | 101       |                        |
| <b>CCOCC</b>     | -7.56        | 8.72        | -1.18        | 1.21        | 211       |                        |
| <b>ccCCN</b>     | -2.08        | 14.20       | -1.17        | 1.72        | 32        |                        |
| <b>CNC</b>       | <b>-6.12</b> | <b>7.06</b> | <b>-1.09</b> | <b>1.14</b> | <b>58</b> | <b>Secondary Amine</b> |
| <b>C(=O)CO</b>   | -0.86        | 10.57       | -1.08        | 1.40        | 66        |                        |
| <b>CCCOC</b>     | -6.51        | 7.72        | -1.05        | 1.09        | 170       |                        |
| <b>CCCCN</b>     | -4.23        | 10.43       | -1.03        | 1.33        | 57        |                        |
| <b>COCCO</b>     | -5.83        | 7.19        | -0.99        | 1.04        | 294       |                        |
| <b>CNC=O</b>     | -4.49        | 6.82        | -0.98        | 1.09        | 43        |                        |
| <b>CCCCO</b>     | -5.15        | 7.45        | -0.97        | 1.07        | 803       |                        |
| <b>CCOC</b>      | -6.08        | 7.03        | -0.96        | 0.99        | 322       |                        |
| <b>C(n)O</b>     | -5.45        | 6.53        | -0.92        | 0.95        | 49        |                        |
| <b>CC(CO)O</b>   | -5.04        | 6.86        | -0.92        | 0.98        | 850       |                        |

|            |              |             |              |             |            |                        |
|------------|--------------|-------------|--------------|-------------|------------|------------------------|
| C(CO)CO    | -4.81        | 6.74        | -0.90        | 0.97        | 462        |                        |
| CC(C)O     | -5.14        | 6.30        | -0.89        | 0.94        | 461        |                        |
| CCCN       | -4.29        | 8.03        | -0.88        | 1.06        | 101        |                        |
| ccC(=O)O   | 0.69         | 10.53       | -0.84        | 1.61        | 34         |                        |
| CCC=O      | -2.92        | 7.48        | -0.83        | 1.03        | 250        |                        |
| C(=O)N     | -3.43        | 5.18        | -0.81        | 0.89        | 51         |                        |
| COC        | -4.60        | 5.35        | -0.81        | 0.83        | 113        |                        |
| CCCO       | -4.45        | 6.25        | -0.80        | 0.88        | 1134       |                        |
| C=CC       | <b>-2.50</b> | <b>5.58</b> | <b>-0.80</b> | <b>0.96</b> | <b>52</b>  | <b>Alkene</b>          |
| cC=O       | -1.87        | 6.41        | -0.80        | 1.08        | 33         |                        |
| CCC(C)N    | -4.66        | 7.96        | -0.77        | 0.95        | 62         |                        |
| C(C(O)O)O  | -3.08        | 5.20        | -0.72        | 0.81        | 46         |                        |
| CC(C=O)N   | -3.45        | 8.10        | -0.72        | 0.95        | 83         |                        |
| C(CO)O     | -3.37        | 5.44        | -0.69        | 0.77        | 566        |                        |
| CC(C)N     | -4.10        | 7.48        | -0.68        | 0.85        | 91         |                        |
| CC=O       | -1.65        | 6.22        | -0.67        | 0.87        | 316        |                        |
| CCC(O)O    | -3.11        | 5.14        | -0.66        | 0.74        | 45         |                        |
| CC(O)OC    | -3.38        | 5.01        | -0.66        | 0.72        | 66         |                        |
| CNCCO      | -3.99        | 7.01        | -0.64        | 0.78        | 42         |                        |
| CCN        | -3.18        | 6.33        | -0.63        | 0.78        | 248        |                        |
| C(C=O)CO   | -1.81        | 9.45        | -0.61        | 0.86        | 56         |                        |
| CC(CO)N    | -3.88        | 7.79        | -0.61        | 0.82        | 88         |                        |
| CCOCO      | -3.29        | 4.99        | -0.59        | 0.65        | 105        |                        |
| CC(O)O     | -2.55        | 4.31        | -0.57        | 0.64        | 49         |                        |
| CCO        | -2.85        | 4.73        | -0.57        | 0.65        | 1406       |                        |
| C(C=O)N    | -1.87        | 6.37        | -0.52        | 0.75        | 95         |                        |
| COCO       | -2.59        | 4.07        | -0.51        | 0.57        | 61         |                        |
| CN         | <b>-2.46</b> | <b>4.49</b> | <b>-0.50</b> | <b>0.60</b> | <b>197</b> | <b>Primary Amine</b>   |
| C(O)O      | <b>-1.64</b> | <b>3.38</b> | <b>-0.40</b> | <b>0.47</b> | <b>46</b>  |                        |
| CCC(=O)O   | 1.00         | 9.18        | -0.37        | 0.82        | 192        |                        |
| C(CO)N     | -1.23        | 6.46        | -0.35        | 0.62        | 103        |                        |
| CO         | <b>-1.11</b> | <b>3.34</b> | <b>-0.34</b> | <b>0.45</b> | <b>984</b> | <b>Alcohol</b>         |
| C(C(=O)O)N | -0.19        | 7.36        | -0.32        | 0.69        | 84         |                        |
| C=O        | <b>0.52</b>  | <b>4.46</b> | <b>-0.26</b> | <b>0.51</b> | <b>324</b> | <b>Ketone</b>          |
| CC(=O)O    | 2.58         | 8.51        | -0.21        | 0.72        | 218        |                        |
| CCCOP      | -0.48        | 5.86        | -0.14        | 0.30        | 67         |                        |
| C(C(=O)O)O | 9.19         | 15.78       | -0.09        | 0.93        | 34         |                        |
| CCOP       | 1.56         | 5.46        | -0.05        | 0.24        | 76         |                        |
| C(=O)O     | <b>3.76</b>  | <b>7.51</b> | <b>-0.04</b> | <b>0.60</b> | <b>238</b> | <b>Carboxylic Acid</b> |
| C(COP)O    | 2.52         | 6.24        | -0.02        | 0.26        | 70         |                        |
| CCOPO      | 4.55         | 7.74        | 0.06         | 0.31        | 150        |                        |

|                        |              |              |             |             |           |                  |
|------------------------|--------------|--------------|-------------|-------------|-----------|------------------|
| <b>COP</b>             | 3.23         | 4.48         | 0.07        | 0.16        | 66        |                  |
| <b>CCOP=O</b>          | 5.36         | 8.01         | 0.09        | 0.31        | 76        |                  |
| <b>P</b>               | 3.05         | 3.09         | 0.10        | 0.11        | 67        |                  |
| <b>COPO</b>            | 6.26         | 7.28         | 0.17        | 0.26        | 132       |                  |
| <b>OP</b>              | 5.96         | 6.05         | 0.20        | 0.21        | 199       |                  |
| <b>OPOP</b>            | 7.38         | 7.38         | 0.20        | 0.20        | 56        |                  |
| <b>COP=O</b>           | 7.16         | 7.86         | 0.21        | 0.27        | 66        |                  |
| <b>O=P</b>             | 7.19         | 7.23         | 0.24        | 0.25        | 67        |                  |
| <b>OPOPO</b>           | 8.96         | 8.96         | 0.24        | 0.24        | 56        |                  |
| <b>COP(O)O</b>         | 9.28         | 10.26        | 0.27        | 0.36        | 66        |                  |
| <b>O=P(O)OP</b>        | 10.29        | 10.29        | 0.28        | 0.28        | 56        |                  |
| <b>O=POPO</b>          | 10.29        | 10.29        | 0.28        | 0.28        | 56        |                  |
| <b>OPO</b>             | 8.77         | 8.91         | 0.29        | 0.30        | 197       |                  |
| <b>COP(=O)O</b>        | 10.18        | 10.91        | 0.31        | 0.37        | 132       |                  |
| <b>O=PO</b>            | 10.08        | 10.17        | 0.33        | 0.34        | 199       |                  |
| <b>OP(O)O</b>          | 11.49        | 11.69        | 0.37        | 0.39        | 65        |                  |
| <b>O=P(O)O</b>         | 12.88        | 13.03        | 0.42        | 0.44        | 197       |                  |
| <b>O=P(O)(O)<br/>O</b> | <b>15.58</b> | <b>15.78</b> | <b>0.51</b> | <b>0.53</b> | <b>65</b> | <b>Phosphate</b> |

Table S4, see excel file
