# Supplementary material for: Coupling Mixed Mode Chromatography/ESI Negative MS Detection with Message-Passing Neural Network Modeling for Enhanced Metabolome Coverage and Structural Identification
Source: MDPI journal article supplement (doi:10.3390/metabo11110772), 2021-11-11
Supplement: s1 [file s1]

**Supplemental Figures:**

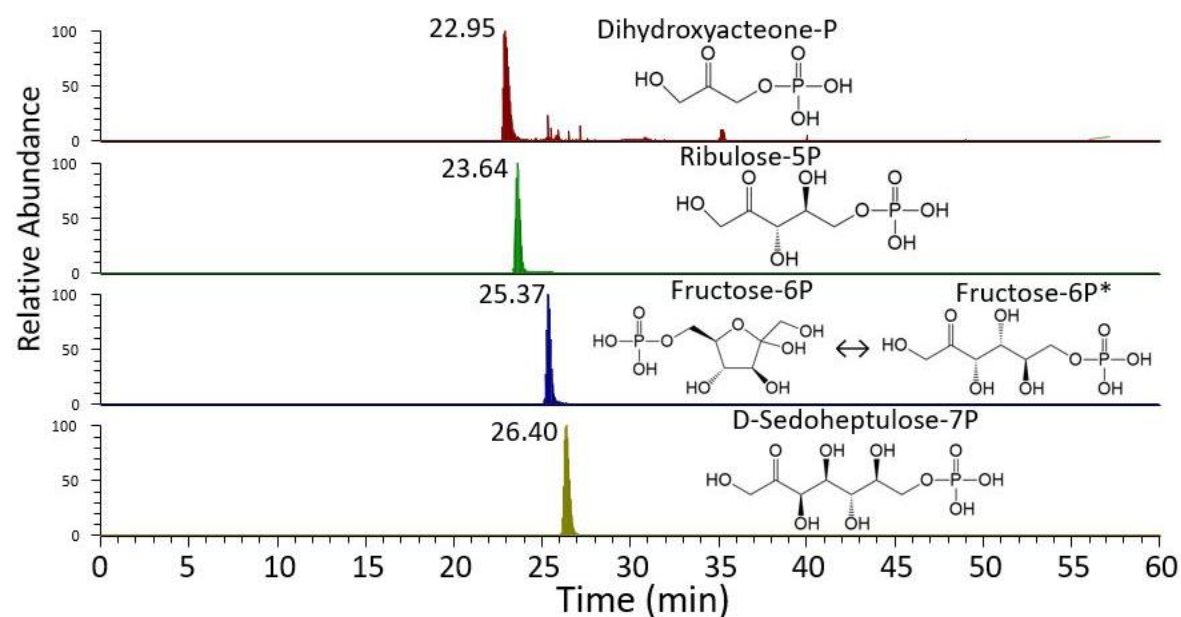

**Figure S1.** Elution order of C4 to C7 monophosphorylated ketoses: More CH<sub>2</sub>O content leads to stronger retention: C3 (dihydroxyacetone phosphate, DHAP) < C5 (xylulose-5P/ribulose-5P) < C6 (fructose-6P/fructose-1P) < C7 (sedoheptulose-7P).

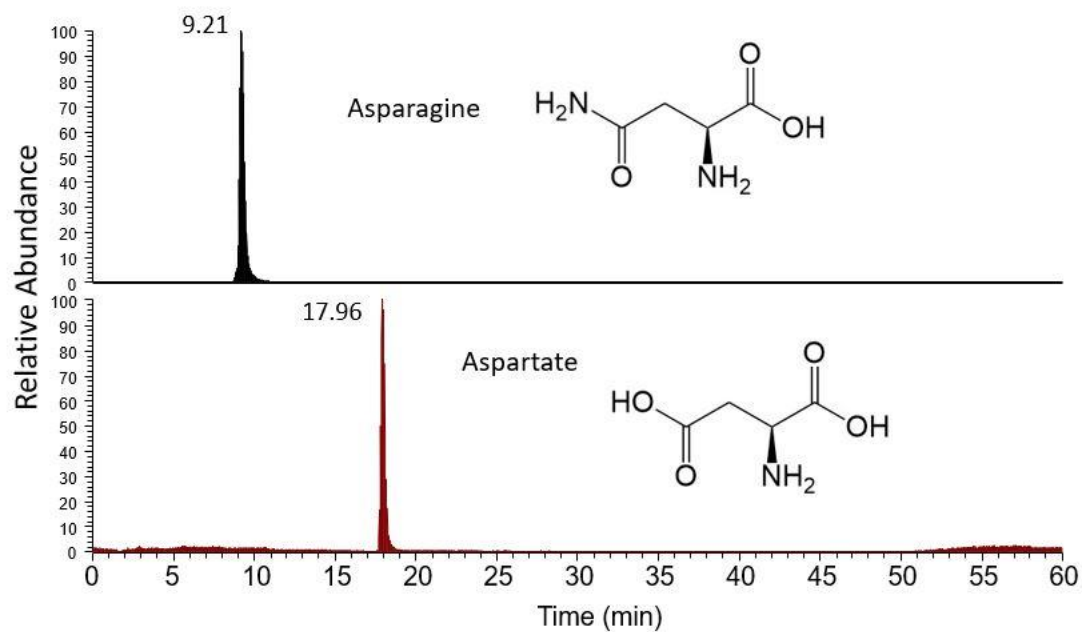

**Figure S2.** Replacing -COOH with an amide leads to earlier elution of Asn relative to Asp.
