# Supplementary material for: Coupling Mixed Mode Chromatography/ESI Negative MS Detection with Message-Passing Neural Network Modeling for Enhanced Metabolome Coverage and Structural Identification
Source: Metabolites. 2021 Nov 11;11(11):772. doi: 10.3390/metabo11110772 (PMC8620857; doi:10.3390/metabo11110772)
Supplement: Supplementary file 1 [file metabolites-11-00772-s001.zip]

Archive with 5 entries (5 files):
- Xing et al Supplemental figures.pdf
- Xing et al Supplemental methods.pdf
- Xing et al Supplemental Tables.pdf
- Xing et al Table S1.xlsx
- Xing et al Table S4.xlsx
