# Supplementary material for: Coupling Mixed Mode Chromatography/ESI Negative MS Detection with Message-Passing Neural Network Modeling for Enhanced Metabolome Coverage and Structural Identification
Source: Metabolites. 2021 Nov 11;11(11):772. doi: 10.3390/metabo11110772 (PMC8620857; doi:10.3390/metabo11110772)
Supplement: Supplementary file 1 [file metabolites-11-00772-s001.zip › Xing et al Table S1.xlsx]

## Sheet: All metabolites
	CNAME	smiles	neg RT (min)	predicted neg RT (min)	error neg RT (min)	|error neg RT (min)|	split	subset
	PHOSPHOCREATINE	C(C(=O)OP(=O)([O-])[O-])N(C)C(N)=[NH2+]	30.24	30.2379	-0.00205959	0.00205959	train	,,,
	2,4-DIHYDROXYPYRIMIDINE-5-CARBOXYLIC ACID	O=c1c(C(=O)O)c[nH]c(=O)[nH]1	9.05	9.05444	0.00444171	0.00444171	train	,,carboxylic_acids,isomer
	2-METHYLGLUTARIC ACID	C(CCC(=O)O)(C)C(=O)O	22.99	22.9966	0.00656042	0.00656042	train	,,carboxylic_acids,isomer
	DIMETHYLBENZIMIDAZOLE	c1c(C)c(cc2nc[nH]c12)C	2.27	2.27736	0.00736418	0.00736418	train	,,,
	OPHTHALMIC ACID	C(CC)(C(=O)N(CC(=O)O)C(CCC(C(=O)O)N)=O)N	20.04	20.0483	0.00832879	0.00832879	train	,,,
	5-AMINOIMIDAZOLE-4-CARBOXAMIDE-1-BETA-D-RIBOFURANOSYL 5'-MONOPHOSPHATE	c1nc(c(N)n1C1C(O)C(O)C(COP(=O)(O)O)O1)C(=O)N	26.28	26.2885	0.0085489	0.0085489	train	,,,
	ALPHA-KETOGLUTARIC ACID	C(CC(=O)O)C(=O)C(=O)O	24.9	24.9088	0.00883174	0.00883174	train	,,carboxylic_acids,
	2'-DEOXYGUANOSINE	c1nc2c(=O)nc(N)[nH]c2n1C1CC(O)C(CO)O1	6.66	6.65088	-0.00912478	0.00912478	train	sugars,,,isomer
	INDOLE-3-ETHANOL	c1cccc2c1c(c[nH]2)CCO	2.16	2.14946	-0.0105371	0.0105371	train	,,,
	BILIVERDIN	N1C(C(=C(C)C1=O)C=C)=Cc1c(C)c(CCC(=O)O)c(C=c2c(CCC(=O)O)c(C)c(=CC=3C(C)=C(C(=O)N3)C=C)[nH]2)[nH]1	18.57	18.5593	-0.0106634	0.0106634	train	,,,
	GUANOSINE 5'-DIPHOSPHO-D-MANNOSE	OC1C(n2c3c(nc2)c(=O)[nH]c(n3)N)OC(C1O)COP(OP(OC1OC(CO)C(C(C1O)O)O)(=O)O)(=O)O	41.4	41.4114	0.0114383	0.0114383	train	,sugarP,,
	ANILINE-2-SULFONIC ACID	c1cccc(c1S(=O)(=O)O)N	5.1	5.11522	0.0152233	0.0152233	test	,,,
	FRUCTOSE 1,6-BIPHOSPHATE	C(C(C(COP(=O)([O-])[O-])O)O)(C(COP(=O)([O-])[O-])=O)O	39.57	39.5874	0.0173758	0.0173758	train	,sugarP,,
	METHYL VANILLATE	c1c(ccc(c1OC)O)C(=O)OC	1.77	1.7986	0.028604	0.028604	train	,,,isomer
	XANTHOSINE 5'-MONOPHOSPHATE	O=c1c2c(n(cn2)C2OC(C(C2O)O)COP(=O)(O)O)[nH]c([nH]1)=O	32.37	32.334	-0.0359932	0.0359932	train	,sugarP,,
	Guanosine 5'-Monophosphate Hydrate	c1nc2c(=O)nc(N)[nH]c2n1C1C(O)C(O)C(COP(=O)(O)O)O1	30.46	30.4233	-0.036692	0.036692	train	,sugarP,,
	2'-DEOXYCYTIDINE 5'-MONOPHOSPHATE	C(OP(=O)(O)O)C1C(CC(O1)n1c(=O)nc(N)cc1)O	25.58	25.5402	-0.0397833	0.0397833	train	,sugarP,,
	ADENINE	Nc1c2c(nc[nH]1)ncn2	4.85	4.80683	-0.0431743	0.0431743	train	sugars,,,
	N-ACETYLGLYCINE	C(C(=O)O)NC(C)=O	6.7	6.65468	-0.0453239	0.0453239	train	,,carboxylic_acids,
	THYMINE	Cc1c(=O)[nH]c(=O)[nH]c1	2.62	2.66837	0.0483685	0.0483685	train	sugars,,,isomer
	D-XYLOSE	C1C(O)C(O)C(O)C(O)O1	4.02	4.07705	0.0570548	0.0570548	train	sugars,,,
	5-HYDROXYMETHYLURACIL	C(O)c1c(=O)[nH]c(=O)[nH]c1	3.95	4.01383	0.063829	0.063829	train	,,,
	GLUTARATE	C(CCC(=O)O)C(=O)O	23.49	23.4257	-0.0643354	0.0643354	train	,,,
	D-GLUCOSE-6-PHOSPHATE	C(C(C(C=O)O)O)(C(COP(=O)(O)O)O)O	26.98	27.0466	0.0666085	0.0666085	train	,sugarP,,
	6-CARBOXYHEXANOATE	C(CCCCC(=O)O)C(=O)O	23.49	23.4209	-0.0691134	0.0691134	train	,,carboxylic_acids,
	2-DEOXY-D-GLUCOSE	C(O)C1C(O)C(CC(O)O1)O	5.22	5.29092	0.0709151	0.0709151	train	sugars,,,
	FOLIC ACID	C(CCC(=O)O)(C(=O)O)NC(c1ccc(cc1)NCc1cnc2c(c(=O)nc(N)[nH]2)n1)=O	31.56	31.6347	0.0746817	0.0746817	train	,,carboxylic_acids,
	(2-AMINOETHYL)PHOSPHONATE	C(CN)P(=O)(O)O	20.68	20.6028	-0.0771594	0.0771594	train	,,,
	D-GLUCOSE 6-PHOSPHATE	C(OP(=O)(O)O)C1C(O)C(O)C(C(O1)O)O	26.98	27.0582	0.0782107	0.0782107	train	,sugarP,,
	5-OXO-D-PROLINE	O=C1CCC(C(=O)O)N1	7.29	7.37771	0.0877052	0.0877052	train	,,carboxylic_acids,
	5-OXO-L-PROLINE	O=C1CCC(C(=O)O)N1	7.29	7.37771	0.0877052	0.0877052	train	,,,
	D-TAGATOSE	C1(C(C(COC1(CO)O)O)O)O	4.31	4.21675	-0.0932483	0.0932483	train	sugars,,,
	HOMOGENTISATE	c1c(CC(=O)O)c(ccc1O)O	7.47	7.37464	-0.0953629	0.0953629	train	,,,
	INOSINE 5'-PHOSPHATE	c1nc2c(=O)nc[nH]c2n1C1C(O)C(O)C(COP(=O)(O)O)O1	27.44	27.3436	-0.0964091	0.0964091	train	,,,
	3,4-DIHYDROXYPHENYLACETATE	c1c(ccc(c1O)O)CC(=O)O	8.05	7.94723	-0.102769	0.102769	train	,,carboxylic_acids,
	N-Acetyl-DL-glutamic acid	C(CC(=O)O)C(C(=O)O)NC(C)=O	24.47	24.584	0.113983	0.113983	train	,,carboxylic_acids,
	D-(+)-GLUCOSAMINE	C(O)C(O)C(O)C(O)C(N)C=O	5.49	5.60534	0.115343	0.115343	train	sugars,,,
	URIDINE 5'-DIPHOSPHOGALACTOSE	OC1C(OC(C1O)COP(OP(OC1OC(CO)C(C(C1O)O)O)(=O)O)(=O)O)n1c(=O)[nH]c(cc1)=O	36.55	36.6702	0.12023	0.12023	train	,sugarP,,
	CYTIDINE	C(O)C1C(O)C(O)C(O1)n1c(=O)nc(N)cc1	5.32	5.44106	0.121055	0.121055	train	sugars,,,
	CYTOSINE	O=c1[nH]c(N)ccn1	4.44	4.56773	0.12773	0.12773	train	sugars,,,
	CREATINE PHOSPHATE	C(C(=O)O)N(C)C(N)=NP(=O)([O-])[O-]	30.24	30.3707	0.130705	0.130705	train	,,,
	PHOSPHO(ENOL)PYRUVIC ACID	O=P(OC(C(=O)[O-])=C)([O-])[O-]	49.14	49.0055	-0.134534	0.134534	train	,,carboxylic_acids,
	L-GLUTAMINE	C(CCC(=O)N)(C(=O)O)N	9.05	8.915	-0.135002	0.135002	train	,,carboxylic_acids,
	4-QUINOLINECARBOXYLIC ACID	c1cccc2c1c(ccn2)C(=O)O	6.69	6.82592	0.135919	0.135919	train	,,carboxylic_acids,
	L-SERINE	C(O)C(C(=O)O)N	9.46	9.32071	-0.139292	0.139292	train	,,,
	OROTIC ACID	O=c1[nH]c(C(=O)O)cc(=O)[nH]1	7.95	8.10061	0.150614	0.150614	test	,,,
	GUANINE	c1nc2c(c(=O)nc(N)[nH]2)[nH]1	7.69	7.53768	-0.15232	0.15232	train	sugars,,,
	L-SORBOSE	C(O)C(O)C(O)C(O)C(CO)=O	4.59	4.43435	-0.155648	0.155648	test	sugars,,,
	2-AMINOETHYL DIHYDROGEN PHOSPHATE	C(CN)OP(=O)(O)O	21.69	21.5315	-0.158513	0.158513	train	,,,
	THEOPHYLLINE	c1nc2c(c(=O)n(C)c(=O)n2C)[nH]1	2.92	2.75639	-0.163615	0.163615	train	,,,
	ADENINE	c1nc2ncnc(N)c2[nH]1	4.81	4.97726	0.167262	0.167262	train	sugars,,,
	4-HYDROXY-2-QUINOLINECARBOXYLIC ACID	c1cccc2c1c(=O)cc(C(=O)O)[nH]2	8.24	8.40772	0.167721	0.167721	train	,,carboxylic_acids,
	XANTHOSINE	c1nc2c(=O)[nH]c(=O)[nH]c2n1C1C(O)C(O)C(CO)O1	14.21	14.3798	0.169787	0.169787	train	sugars,,,
	HOMOVANILLATE	c1c(ccc(c1OC)O)CC(=O)O	6.77	6.94225	0.172253	0.172253	train	,,carboxylic_acids,isomer
	4-HYDROXYBENZOATE	c1cc(ccc1C(=O)O)O	9.9	10.0751	0.175089	0.175089	train	,,carboxylic_acids,
	PYRIDOXAMINE	C(c1c(CO)cnc(C)c1O)N	4.81	4.63423	-0.175765	0.175765	train	,,,
	HYPOTAURINE	C(C[NH3+])S(=O)[O-]	7.82	7.6399	-0.180101	0.180101	train	,,,
	PTERIN	c1cnc2c(=O)nc(N)[nH]c2n1	7	6.81821	-0.181792	0.181792	train	sugars,,,
	N-ACETYL-L-ASPARTIC ACID	C(CC(=O)O)(C(=O)O)NC(C)=O	24.37	24.5635	0.193539	0.193539	train	,,carboxylic_acids,
	D-FRUCTOSE	C(C(O)C(CO)=O)(C(CO)O)O	4.23	4.43435	0.204351	0.204351	train	sugars,,,
	N-FORMYLGLYCINE	C(C(=O)O)NC=O	7.11	7.31972	0.209719	0.209719	train	,,carboxylic_acids,
	L-ASPARAGINE	C(C(=O)N)C(C(=O)O)N	9.21	8.99804	-0.211957	0.211957	train	,,carboxylic_acids,
	L-ARABITOL	C(O)C(O)C(O)C(CO)O	4.18	4.39269	0.212686	0.212686	train	sugars,,,
	3-METHYL-2-OXOVALERIC ACID	C(C)C(C)C(=O)C(=O)O	3.94	4.1546	0.214599	0.214599	train	,,carboxylic_acids,
	S-CARBOXYMETHYL-L-CYSTEINE	C(CSCC(=O)O)(C(=O)O)N	17.24	17.0228	-0.217205	0.217205	train	,,,
	SARCOSINE	C(C(=O)O)NC	5.64	5.85786	0.217856	0.217856	train	,,carboxylic_acids,
	ADENOSINE 2',3'-CYCLIC MONOPHOSPHATE	c1nc2c(N)ncnc2n1C1OC(CO)C2OP(=O)(O)OC12	10.6	10.8191	0.219148	0.219148	train	,sugarP,,isomer
	MALTOSE	C(O)C1C(OC2C(O)C(O)C(O)C(CO)O2)C(O)C(O)C(O)O1	8.54	8.76376	0.223764	0.223764	train	sugars,,,
	2-HYDROXYBUTYRIC ACID	C(C)C(O)C(=O)O	5.27	5.49543	0.225429	0.225429	train	,,carboxylic_acids,
	N-ACETYL-D-TRYPTOPHAN	C(Cc1c[nH]c2ccccc12)(C(=O)O)NC(C)=O	6.45	6.6763	0.226305	0.226305	train	,,,
	GUANOSINE 5'-DIPHOSPHOGLUCOSE	OC1C(n2c3c(nc2)c(=O)[nH]c(n3)N)OC(C1O)COP(OP(OC1OC(CO)C(C(C1O)O)O)(=O)O)(=O)O	41.64	41.4114	-0.228562	0.228562	train	,sugarP,,
	OROTATE	O=C(O)c1cc(=O)[nH]c(=O)[nH]1	7.87	8.10061	0.23061	0.23061	train	,,carboxylic_acids,isomer
	(R,R)-TARTARIC ACID	O=C(O)C(O)C(O)C(=O)O	31.61	31.3781	-0.231913	0.231913	test	,,carboxylic_acids,
	URIDINE 5'-DIPHOSPHO-N-ACETYLGLUCOSAMINE	OC1C(OC(C1O)COP(OP(OC1C(NC(C)=O)C(O)C(C(O1)CO)O)(=O)O)(=O)O)n1c(=O)[nH]c(cc1)=O	35.25	35.4822	0.232164	0.232164	train	,sugarP,,
	D-RIBOSE 5-PHOSPHATE	C1(C(COP(=O)([O-])[O-])OC(C1O)O)O	25.21	25.4454	0.235355	0.235355	train	,sugarP,,
	PHENYLPYRUVATE	c1ccccc1CC(=O)C(=O)O	4.13	4.37179	0.241788	0.241788	train	,,carboxylic_acids,isomer
	INOSINE 5'-MONOPHOSPHATE	OC1C(n2c3c(nc2)c(=O)nc[nH]3)OC(C1O)COP(=O)(O)O	27.1	27.3436	0.243592	0.243592	train	,sugarP,,
	BENZOATE	c1ccccc1C(=O)O	5.63	5.8737	0.243698	0.243698	train	,,,
	ARABINOSE	C1C(O)C(O)C(O)C(O)O1	3.83	4.07705	0.247055	0.247055	train	sugars,,,
	3,5-DIIODO-L-THYRONINE	c1c(c(c(cc1CC(C(=O)O)N)I)Oc1ccc(cc1)O)I	8.87	9.11754	0.247543	0.247543	train	,,,
	O-ACETYL-L-SERINE	C(OC(C)=O)C(C(=O)O)N	6.91	7.16081	0.250807	0.250807	train	,,carboxylic_acids,isomer
	3,4-DIHYDROXY-L-PHENYLALANINE	c1c(ccc(c1O)O)CC(C(=O)O)N	24.12	24.3708	0.250828	0.250828	train	,,carboxylic_acids,
	D-(-)-ARABINOSE	C1C(O)C(O)C(O)C(O)O1	3.82	4.07705	0.257055	0.257055	train	sugars,,,
	DEOXYCYTIDINE	C(O)C1C(CC(O1)n1c(=O)nc(N)cc1)O	4.52	4.77802	0.25802	0.25802	train	sugars,,,
	CYTIDINE 5'-DIPHOSPHATE	OC1C(OC(C1O)COP(OP(=O)(O)O)(=O)O)n1c(=O)nc(cc1)N	35.32	35.0612	-0.258818	0.258818	test	,sugarP,,
	BENZOATE	c1ccccc1C(=O)O	5.61	5.8737	0.263698	0.263698	train	,,,
	THIOPURINE S-METHYLETHER	c1nc2ncnc(SC)c2[nH]1	23.41	23.1448	-0.265194	0.265194	train	sugars,,,
	RIBOFLAVIN	c1c(C)c(cc2c1n(CC(O)C(O)C(CO)O)c1c(c(=O)[nH]c(=O)n1)n2)C	3.75	4.02258	0.272585	0.272585	train	,,,
	NORADRENALINE	C(CN)(c1cc(c(cc1)O)O)O	24.13	24.4071	0.277094	0.277094	train	,,,isomer
	2,4-DIHYDROXYPTERIDINE	c1cnc2c(c(=O)[nH]c(=O)[nH]2)n1	4.84	5.11768	0.277675	0.277675	train	sugars,,,
	4-GUANIDINOBUTANOATE	C(CCC(=O)O)N=C(N)N	10.57	10.8481	0.278125	0.278125	train	,,carboxylic_acids,
	THYROXINE	c1c(cc(c(c1I)O)I)Oc1c(cc(cc1I)CC(C(=O)O)N)I	17.73	17.4493	-0.280717	0.280717	train	,,,
	2-AMINO-2-METHYLPROPANOATE	CC(C)(C(=O)O)N	6.38	6.66094	0.280944	0.280944	train	,,carboxylic_acids,
	3-METHOXY-4-HYDROXYMANDELATE	C(c1cc(c(cc1)O)OC)(O)C(=O)O	6.48	6.76556	0.285555	0.285555	train	,,carboxylic_acids,
	PYRIDINE-2,3-DICARBOXYLATE	c1ccnc(c1C(=O)O)C(=O)O	27.29	27.5772	0.287207	0.287207	train	,,carboxylic_acids,
	ADENOSINE 3',5'-DIPHOSPHATE	C1(C(C(C(COP(=O)(O)O)O1)OP(=O)(O)O)O)n1cnc2c(N)ncnc12	39.92	39.6298	-0.290232	0.290232	train	,sugarP,,
	URIDINE 5'-DIPHOSPHO-N-ACETYLGALACTOSAMINE	OC1C(OC(C1O)COP(OP(OC1C(NC(C)=O)C(O)C(C(O1)CO)O)(=O)O)(=O)O)n1c(=O)[nH]c(cc1)=O	35.18	35.4822	0.302164	0.302164	train	,sugarP,,
	1-AMINOCYCLOPROPANE-1-CARBOXYLATE	O=C(O)C1(CC1)N	7.45	7.14533	-0.30467	0.30467	test	,,carboxylic_acids,
	LL-2,6-DIAMINOHEPTANEDIOATE	C(CCCC(C(=O)O)N)(C(=O)O)N	20.87	21.1795	0.309502	0.309502	train	,,carboxylic_acids,
	N-AMIDINO-L-ASPARTATE	C(CC(=O)O)(C(=O)O)N=C(N)N	21.16	21.4697	0.309679	0.309679	train	,,carboxylic_acids,
	BENZYL ALCOHOL	c1ccccc1CO	2.37	2.68263	0.312627	0.312627	train	,,,
	PURINE	c1ncnc2nc[nH]c12	3.96	4.27428	0.314278	0.314278	train	sugars,,,
	(S,S)-TARTARIC ACID	C(C(O)C(=O)O)(O)C(=O)O	31.7	31.3781	-0.321916	0.321916	train	,,carboxylic_acids,
	3-SULFINO-L-ALANINE	C(C(C(=O)O)N)S(=O)O	16.95	16.6187	-0.331268	0.331268	test	,,,
	N-ACETYL-L-ALANINE	CC(C(=O)O)NC(C)=O	5.93	6.26472	0.334724	0.334724	train	,,carboxylic_acids,
	MELIBIOSE	C(OC1C(O)C(O)C(O)C(CO)O1)C1C(O)C(O)C(O)C(O)O1	9.12	9.46117	0.341171	0.341171	train	sugars,,,
	GLYCERALDEHYDE	C(O)C(O)C=O	5.65	5.99173	0.341727	0.341727	train	,,,
	6-HYDROXYNICOTINATE	O=C(O)c1ccc(=O)[nH]c1	11.48	11.8228	0.342809	0.342809	train	,,carboxylic_acids,
	N-ACETYL-DL-METHIONINE	C(CCSC)(C(=O)O)NC(C)=O	5.22	5.57201	0.352014	0.352014	train	,,carboxylic_acids,
	3-NITRO-L-TYROSINE	c1c(ccc(c1[N+](=O)[O-])O)CC(C(=O)O)N	11.71	12.0626	0.352585	0.352585	train	,,,
	ALPHA-D-GALACTOSE 1-PHOSPHATE	C1(C(C(C(C(CO)O1)O)O)O)OP(=O)([O-])[O-]	26.47	26.1154	-0.354583	0.354583	train	,sugarP,,
	2'-DEOXYADENOSINE 5'-DIPHOSPHATE	Nc1c2c(n(cn2)C2OC(C(C2)O)COP(OP(=O)(O)O)(=O)O)ncn1	40.02	40.3779	0.357891	0.357891	train	,sugarP,,
	2'-DEOXYCYTIDINE 5'-DIPHOSPHATE	O=c1n(ccc(n1)N)C1OC(C(C1)O)COP(OP(=O)(O)O)(=O)O	35.04	35.4017	0.361692	0.361692	train	,,,
	RIBITOL	C(O)C(O)C(O)C(CO)O	4.03	4.39269	0.362686	0.362686	train	sugars,,,
	SHIKIMATE	O=C(O)C=1CC(O)C(O)C(O)C1	13.76	14.1401	0.380114	0.380114	train	,,carboxylic_acids,
	L-ALLOTHREONINE	CC(O)C(C(=O)O)N	7.66	8.04239	0.382386	0.382386	train	,,carboxylic_acids,
	GALACTITOL	C(O)C(O)C(O)C(O)C(CO)O	5.22	5.60723	0.387231	0.387231	train	sugars,,,
	THYROTROPIN RELEASING HORMONE	C1(CCCN1C(C(Cc1cnc[nH]1)NC(C1CCC(=O)N1)=O)=O)C(=O)N	3.32	3.70767	0.38767	0.38767	train	,,,
	L-METHIONINE	C(CSC)C(C(=O)O)N	6.09	6.47781	0.387807	0.387807	train	,,carboxylic_acids,
	ALPHA-HYDROXYISOBUTYRIC ACID	CC(C)(O)C(=O)O	5.01	5.39911	0.38911	0.38911	test	,,carboxylic_acids,
	CREATININE	CN1CC(=O)N=C1N	2.89	3.27963	0.389632	0.389632	train	,,,
	O-PHOSPHO-L-SERINE	C(COP(=O)(O)O)(C(=O)O)N	29.31	28.9164	-0.393637	0.393637	train	,,carboxylic_acids,
	GLYCEROL 2-PHOSPHATE	O=P([O-])([O-])OC(CCO)CCO	22.51	22.1148	-0.395194	0.395194	train	,,,
	3-AMINO-4-HYDROXYBENZOIC ACID	c1c(ccc(c1N)O)C(=O)O	13.15	13.5511	0.401119	0.401119	train	,,carboxylic_acids,isomer
	DEHYDROASCORBATE	C(O)C(O)C1C(=O)C(=O)C(=O)O1	6.02	6.4242	0.404197	0.404197	train	,,,isomer
	D-(+)-TREHALOSE	C1(C(C(C(C(CO)O1)O)O)O)OC1C(C(C(C(CO)O1)O)O)O	9.39	8.9847	-0.405299	0.405299	test	sugars,,,
	CYTIDINE 2',3'-CYCLIC MONO-PHOSPHATE	C(O)C1OC(C2OP(=O)(O)OC12)n1c(=O)nc(N)cc1	14.46	14.8663	0.406292	0.406292	train	,sugarP,,
	ETHYLMALONIC ACID	C(C)C(C(=O)O)C(=O)O	7.47	7.88118	0.411179	0.411179	test	,,carboxylic_acids,isomer
	O-PHOSPHO-DL-SERINE	C(OP(=O)(O)O)C(C(=O)O)N	29.33	28.9164	-0.413634	0.413634	test	,,,
	UROCANATE	c1c(/C=C/C(=O)O)[nH]cn1	11.88	12.2966	0.416582	0.416582	train	,,carboxylic_acids,
	ADENOSINE 5'-MONOPHOSPHATE	C1(C(C(C(COP(=O)([O-])[O-])O1)O)O)n1cnc2c(N)ncnc12	25.83	26.2469	0.41692	0.41692	train	,sugarP,,isomer
	3-HYDROXY-3-METHYLGLUTARATE	C(C(=O)O)C(CC(=O)O)(C)O	21.32	21.7416	0.421571	0.421571	train	,,carboxylic_acids,
	D-TRYPTOPHAN	C(Cc1c[nH]c2ccccc12)(C(=O)O)N	7.77	8.19528	0.425284	0.425284	train	,,carboxylic_acids,
	L-ISOLEUCINE	C(C(CC)C)(C(=O)O)N	5.39	5.82066	0.430659	0.430659	test	,,carboxylic_acids,
	ADIPIC ACID	C(CCCC(=O)O)C(=O)O	23.49	23.9215	0.431496	0.431496	train	,,carboxylic_acids,isomer
	XYLITOL	C(O)C(O)C(O)C(CO)O	3.96	4.39269	0.432686	0.432686	train	sugars,,,
	D-PSICOSE	C1(C(C(COC1(CO)O)O)O)O	3.78	4.21675	0.436752	0.436752	train	sugars,,,
	DAMP (2?-Deoxyadenosine 5?-monophosphate)	C1(CC(C(COP(=O)(O)O)O1)O)n1cnc2c(N)ncnc12	24.51	24.948	0.438042	0.438042	train	,sugarP,,
	CYS-GLY	C(CS)(C(=O)NCC(=O)O)N	27.52	27.9586	0.438554	0.438554	train	,,,
	ASCORBATE	C(O)C(O)C1C(=O)C(O)=C(O)O1	9.79	9.34975	-0.44025	0.44025	train	,,,isomer
	GLUTATHIONE	C(C(C(=O)NCC(=O)O)NC(CCC(C(=O)O)N)=O)S	21.58	22.0203	0.440292	0.440292	train	,,carboxylic_acids,
	THIOUREA	C(N)(N)=S	3.19	3.63232	0.442317	0.442317	train	,,,
	CMP (cytidine 5?-monophosphate)	C(OP(=O)(O)O)C1C(O)C(O)C(O1)n1c(=O)nc(N)cc1	26.92	26.4769	-0.443085	0.443085	train	,sugarP,,
	L-TRYPTOPHAN	c1cccc2c1c(c[nH]2)CC(C(=O)O)N	7.75	8.19528	0.445283	0.445283	train	,,,
	HYPOXANTHINE	c1nc2c(c(=O)nc[nH]2)[nH]1	5.33	4.87811	-0.451892	0.451892	train	sugars,,,
	5'-DEOXYADENOSINE	C1(C(C(C(C)O1)O)O)n1cnc2c(N)ncnc12	3.1	3.55347	0.453474	0.453474	train	sugars,,,
	TRANS-4-HYDROXYPROLINE	O=C(O)C1CC(CN1)O	7.13	7.58834	0.458341	0.458341	train	,,carboxylic_acids,
	LEUCINE	C(C(C(=O)O)N)C(C)C	5.23	5.68859	0.458594	0.458594	train	,,carboxylic_acids,
	AZELAIC ACID	C(CCCCCCC(=O)O)C(=O)O	21.27	21.7313	0.46135	0.46135	train	,,carboxylic_acids,
	MANDELIC ACID	c1ccccc1C(O)C(=O)O	5.1	5.57294	0.472945	0.472945	train	,,carboxylic_acids,
	PYRUVATE	CC(=O)C(=O)O	4.95	5.42594	0.475941	0.475941	train	,,carboxylic_acids,
	3-HYDROXYANTHRANILATE	c1ccc(c(c1C(=O)O)N)O	9.72	9.24217	-0.477828	0.477828	train	,,,isomer
	URIDINE-5-MONOPHOSPHATE	C(OP(=O)(O)O)C1C(O)C(O)C(O1)n1c(=O)[nH]c(=O)cc1	24.45	24.9283	0.478339	0.478339	train	,sugarP,,
	3-AMINOISOBUTANOATE	C(C(C)C(=O)O)N	6.53	7.01301	0.483011	0.483011	train	,,carboxylic_acids,
	L-PHENYLALANINE	c1ccccc1CC(C(=O)O)N	5.66	6.14631	0.486306	0.486306	train	,,carboxylic_acids,
	SUCCINATE	C(CC(=O)O)C(=O)O	20.11	20.5972	0.487195	0.487195	train	,,carboxylic_acids,isomer
	4-HYDROXY-L-PHENYLGLYCINE	C(c1ccc(cc1)O)(C(=O)O)N	11.45	11.9435	0.493484	0.493484	train	,,,
	4-COUMARATE	c1cc(ccc1C=CC(=O)O)O	10.25	10.7459	0.495863	0.495863	train	,,carboxylic_acids,isomer
	MYO-INOSITOL	OC1C(O)C(O)C(O)C(O)C1O	6.54	6.04361	-0.496394	0.496394	test	sugars,,,
	CIS-4-HYDROXY-D-PROLINE	C1(CC(CN1)O)C(=O)O	7.09	7.58834	0.49834	0.49834	train	,,carboxylic_acids,
	L-PIPECOLIC ACID	O=C(O)C1CCCCN1	5.02	5.52022	0.500222	0.500222	train	,,,
	PIPECOLATE	O=C(O)C1CCCCN1	5.02	5.52022	0.500222	0.500222	train	,,carboxylic_acids,
	L-ORNITHINE	C(CCN)C(C(=O)O)N	23.52	24.0222	0.502165	0.502165	train	,,carboxylic_acids,
	ALPHA-D-GLUCOSE	C1(C(C(CO)OC(C1O)O)O)O	5.34	5.8455	0.505504	0.505504	train	sugars,,,
	GUANOSINE 3',5'-CYCLIC MONOPHOSPHATE	O=c1c2c(n(cn2)C2C(O)C3C(O2)COP(O3)(=O)O)nc([nH]1)N	19.48	19.9971	0.517144	0.517144	train	,sugarP,,
	4-HYDROXYPHENYLACETATE	c1cc(ccc1CC(=O)O)O	8.63	8.10967	-0.520325	0.520325	train	,,carboxylic_acids,
	L-GLUTAMIC ACID	C(CC(=O)O)C(C(=O)O)N	17.13	17.6536	0.523628	0.523628	train	,,carboxylic_acids,isomer
	N-ACETYLSEROTONIN	c1c(ccc2c1c(c[nH]2)CCNC(C)=O)O	2.52	3.04673	0.526726	0.526726	train	,,,
	3,5-DIIODO-L-TYROSINE	C(C(C(O)=O)N)c1cc(I)c(c(c1)I)O	18.81	18.2832	-0.526826	0.526826	train	,,,
	D-GLUCOSAMINE 6-PHOSPHATE	C(C(C(C=O)N)O)(C(COP(=O)(O)O)O)O	25.81	25.2809	-0.529064	0.529064	train	,sugarP,,
	PROPYNOATE	O=C(O)C#C	5.33	5.8593	0.529302	0.529302	train	,,carboxylic_acids,
	3-HYDROXYKYNURENINE	c1ccc(c(c1C(CC(C(=O)O)N)=O)N)O	11.16	11.6949	0.534937	0.534937	train	,,,
	N-ACETYL-L-PHENYLALANINE	C(Cc1ccccc1)(C(=O)O)NC(C)=O	4.94	5.49533	0.555328	0.555328	train	,,carboxylic_acids,
	6-PHOSPHOGLUCONIC ACID	C(OP(=O)(O)O)C(O)C(O)C(O)C(O)C(=O)O	35.2	34.6419	-0.558144	0.558144	train	sugars,,carboxylic_acids,
	RESORCINOL MONOACETATE	c1ccc(cc1O)OC(C)=O	2.38	2.93883	0.558828	0.558828	train	,,,
	3-AMINO-5-HYDROXYBENZOIC ACID	C(O)(=O)c1cc(N)cc(c1)O	12.4	12.9622	0.562185	0.562185	train	,,carboxylic_acids,isomer
	3',5'-CYCLIC AMP	c1nc2c(N)ncnc2n1C1C(O)C2OP(=O)(O)OCC2O1	12.33	12.897	0.567044	0.567044	train	,,,
	MESO-TARTARIC ACID	C(C(C(O)=O)O)(C(O)=O)O	30.81	31.3781	0.568087	0.568087	train	,,carboxylic_acids,
	INDOLE-3-ACETATE	c1cccc2c1c(c[nH]2)CC(=O)O	7.33	6.76095	-0.569054	0.569054	train	,,carboxylic_acids,
	4-ACETAMIDOBUTANOATE	C(CCC(=O)O)NC(C)=O	6.61	7.17952	0.569521	0.569521	train	,,carboxylic_acids,
	ANTHRANILATE	c1cccc(c1C(=O)O)N	6.16	5.58958	-0.570424	0.570424	train	,,,
	L-VALINE	CC(C)C(C(=O)O)N	5.77	6.34454	0.574537	0.574537	test	,,carboxylic_acids,
	2-QUINOLINECARBOXYLIC ACID	c1cccc2ccc(C(=O)O)nc12	6.98	6.40259	-0.577409	0.577409	train	,,carboxylic_acids,
	L-THREONINE	CC(O)C(C(=O)O)N	7.46	8.04239	0.582386	0.582386	train	,,carboxylic_acids,
	D-ASPARTATE	C(C(=O)O)C(C(=O)O)N	18.19	18.7732	0.583245	0.583245	train	,,carboxylic_acids,
	3-HYDROXYBENZOATE	c1c(cccc1O)C(=O)O	9.09	9.67806	0.58806	0.58806	train	,,carboxylic_acids,
	D-MANNOSE 6-PHOSPHATE	C(OP(=O)(O)O)C1C(O)C(O)C(C(O1)O)O	26.47	27.0582	0.588211	0.588211	train	,sugarP,,
	N-ACETYL-L-CYSTEINE	C(C(C(=O)O)NC(C)=O)S	5.6	6.19462	0.594621	0.594621	train	,,carboxylic_acids,
	URIDINE 5'-DIPHOSPHOGLUCOSE	C1(C(C(C(COP(=O)(OP(=O)(OC2C(C(C(C(CO)O2)O)O)O)[O-])[O-])O1)O)O)n1c(=O)[nH]c(=O)cc1	36.5	37.0954	0.595408	0.595408	train	,sugarP,,
	DIACETYL	CC(=O)C(C)=O	4.95	5.54672	0.596722	0.596722	train	,,carboxylic_acids,
	PALATINOSE	O(CC(C(C(C(CO)=O)O)O)O)C1OC(CO)C(C(C1O)O)O	7.53	8.12805	0.598049	0.598049	test	sugars,,,
	INDOLE-3-ACETIC ACID	C(C(O)=O)c1c2c([nH]c1)cccc2	7.36	6.76095	-0.59905	0.59905	train	,,,
	L-LYSINE	C(CCCN)C(C(=O)O)N	22.99	23.5894	0.599376	0.599376	train	,,carboxylic_acids,
	D-GLUCURONIC ACID	C(C(C(C=O)O)O)(C(C(O)=O)O)O	13.88	14.4841	0.604071	0.604071	train	,,carboxylic_acids,
	D-RIBULOSE 1,5-BISPHOSPHATE	C1(C(C(O)C(OP(=O)(O)O)O1)O)COP(=O)(O)O	41.29	40.6727	-0.617303	0.617303	train	,sugarP,,
	CORTISONE	C12C3C(C4(C)CCC(=O)C=C4CC3)C(=O)CC1(C(CC2)(O)C(CO)=O)C	1.56	2.17807	0.61807	0.61807	train	,,,
	CITRATE	C(C(=O)O)C(CC(=O)O)(O)C(=O)O	36.32	36.9512	0.631161	0.631161	train	,,carboxylic_acids,
	D-(+)-CELLOBIOSE	C(O)C1C(OC2C(O)C(O)C(O)C(CO)O2)C(O)C(O)C(O)O1	8.13	8.76376	0.633764	0.633764	train	sugars,,,
	MANNITOL	C(O)C(O)C(O)C(O)C(CO)O	4.97	5.60723	0.637231	0.637231	train	sugars,,,
	MELATONIN	c1c(ccc2c1c(c[nH]2)CCNC(C)=O)OC	1.77	2.40784	0.637843	0.637843	train	,,,
	4-AMINOBENZOATE	c1cc(ccc1C(=O)O)N	7.49	8.1292	0.639198	0.639198	test	,,,
	FORMYL-L-METHIONYL PEPTIDE	C(CSC)C(C(=O)O)NC=O	5.51	6.15231	0.642314	0.642314	train	,,,
	3,3',5'-TRIIODOTHYRONINE	C(Cc1cc(c(cc1)Oc1cc(c(c(c1)I)O)I)I)(C(=O)O)N	10.8	11.4469	0.646947	0.646947	test	,,,
	XANTHURENIC ACID	c1ccc(O)c2c1c(=O)cc(C(=O)O)[nH]2	19.48	20.128	0.647963	0.647963	train	,,carboxylic_acids,
	CREATINE	C(C(=O)O)N(C)C(N)=N	7.39	8.03889	0.648888	0.648888	train	,,carboxylic_acids,
	TRANS-ACONITATE	C(C(C(=O)O)=CC(=O)O)C(=O)O	27.04	27.6954	0.655351	0.655351	train	,,carboxylic_acids,isomer
	MERCAPTOPYRUVATE	C(C(=O)C(=O)O)S	4.2	4.8597	0.659698	0.659698	train	,,carboxylic_acids,
	L-HISTIDINE	c1c(CC(C(=O)O)N)[nH]cn1	10.76	11.4206	0.660551	0.660551	train	,,carboxylic_acids,
	BUTANOATE	C(CC)C(=O)O	5.31	5.97378	0.663776	0.663776	train	,,carboxylic_acids,isomer
	N-ACETYL-D-GLUCOSAMINE	C(O)C1C(O)C(O)C(C(O)O1)NC(C)=O	4.38	5.0516	0.671597	0.671597	train	sugars,,,
	ADENOSINE 5'-DIPHOSPHATE	C1(C(C(C(COP(=O)(O)OP(=O)(O)O)O1)O)O)n1cnc2c(N)ncnc12	40	40.6746	0.67463	0.67463	train	,sugarP,,
	1-METHYLADENOSINE	C1([C@H](OC(C1O)CO)n1cnc2c(n(C)cnc12)=N)O	3.24	3.91842	0.678423	0.678423	train	sugars,,,
	TAUROLITHOCHOLATE	C12C(C(C(CCC(=O)NCCS(=O)(=O)[O-])C)CC2)(C)CCC2C1CCC1C2(C)CCC(C1)O	4.82	5.50643	0.686435	0.686435	train	,,carboxylic_acids,
	ADENOSINE 3',5'-CYCLIC MONOPHOSPHATE	OC1C(n2c3c(nc2)c(N)ncn3)OC2C1OP(OC2)(=O)O	12.21	12.897	0.687046	0.687046	train	,sugarP,,isomer
	GLYCERALDEHYDE 3-PHOSPHATE DIETHYL ACETAL	C(C(COP(=O)(O)O)O)(OCC)OCC	13.15	13.8462	0.696235	0.696235	train	,,,
	INDOXYL SULFATE	c1cccc2c1c(c[nH]2)OS(=O)(=O)[O-]	4.81	5.51453	0.704529	0.704529	train	,,,
	N-ACETYL-L-LEUCINE	C(CC(C)C)(C(=O)O)NC(C)=O	4.89	5.59568	0.705678	0.705678	train	,,carboxylic_acids,
	L-METHIONINE SULFOXIMINE	C(CCS(C)(=O)=N)(C(=O)O)N	8.54	9.25059	0.710587	0.710587	train	,,carboxylic_acids,
	ADENOSINE	c1nc2c(N)ncnc2n1C1C(O)C(O)C(CO)O1	4.42	5.1366	0.716605	0.716605	train	sugars,,,isomer
	(S)-DIHYDROOROTATE	C1(CC(=O)NC(=O)N1)C(=O)O	7.48	8.1976	0.717597	0.717597	train	,,carboxylic_acids,
	OMEGA-HYDROXYDODECANOIC ACID	C(CCCCCCCCO)CCC(=O)O	4.57	5.29153	0.721534	0.721534	train	,,carboxylic_acids,
	L-TYROSINE	c1cc(ccc1CC(C(=O)O)N)O	9.35	10.0729	0.72292	0.72292	train	,,,
	S-(5'-ADENOSYL)-L-HOMOCYSTEINE	c1nc2c(N)ncnc2n1C1C(O)C(O)C(CSCCC(C(=O)O)N)O1	16.66	17.3833	0.723346	0.723346	train	,,,
	5-HYDROXYINDOLEACETATE	c1c(ccc2c1c(c[nH]2)CC(=O)O)O	11.92	12.6491	0.729078	0.729078	train	,,,
	DL-5-HYDROXYLYSINE	C(CCC(CN)O)(C(=O)O)N	23.54	24.2692	0.729242	0.729242	train	,,carboxylic_acids,
	CHOLATE	C12C3C(C(C(CCC(=O)O)C)CC3)(C(CC1C1(C(CC2O)CC(CC1)O)C)O)C	7.72	8.45028	0.730279	0.730279	train	,,carboxylic_acids,
	D-LACTOSE	C1(C(C(O)C(O)OC1CO)O)OC1C(C(C(C(CO)O1)O)O)O	8.03	8.76376	0.733764	0.733764	train	sugars,,,
	NICOTINAMIDE HYPOXANTHINE DINUCLEOTIDE	OC1C(n2c3c(nc2)c(=O)[nH]cn3)OC(C1O)COP(OP(OCC1OC(C(C1O)O)[n+]1cc(C(N)=O)ccc1)(=O)[O-])(=O)O	27.35	28.0845	0.734513	0.734513	train	,sugarP,,
	SN-GLYCEROL 3-PHOSPHATE	C(OP(=O)(O)O)C(CO)O	23.28	22.538	-0.742037	0.742037	train	,,,
	N-ACETYL-DL-SERINE	C(O)C(C(=O)O)NC(C)=O	7.04	7.79518	0.755177	0.755177	test	,,carboxylic_acids,isomer
	D-RIBOSE	C(O)C1C(O)C(O)C(O)O1	3.26	4.01764	0.757642	0.757642	train	sugars,,,
	D-GLYCERIC ACID	C(C(O)=O)(CO)O	6.95	7.71127	0.761269	0.761269	train	,,,
	MANNOSE	C(O)C1C(O)C(O)C(O)C(O)O1	5.08	5.84551	0.765505	0.765505	train	sugars,,,
	D-ALANINE	CC(C(=O)O)N	7.4	8.16893	0.768933	0.768933	train	,,carboxylic_acids,
	3-(4-HYDROXYPHENYL)PYRUVATE	c1cc(ccc1CC(=O)C(=O)O)O	2.5	3.27406	0.774061	0.774061	train	,,carboxylic_acids,isomer
	SUCROSE	C1(C(C(C(CO)O1)O)O)(CO)OC1C(C(C(C(CO)O1)O)O)O	7.2	7.97711	0.777112	0.777112	train	sugars,,,
	REICHSTEIN?S SUBSTANCE S	C12C3C(C4(C)CCC(=O)C=C4CC3)CCC1(C(CC2)(O)C(CO)=O)C	1.75	2.52712	0.777124	0.777124	train	,,,
	N-ACETYL-D-MANNOSAMINE	C1(C(C(C(CO)OC1O)O)O)NC(C)=O	4.27	5.0516	0.7816	0.7816	train	sugars,,,
	ALPHA-D-GLUCOSE 1-PHOSPHATE	C1(C(C(C(C(CO)O1)O)O)O)OP(=O)(O)O	26.42	27.2044	0.784437	0.784437	train	,sugarP,,
	CARNOSINE	C(Cc1cnc[nH]1)(C(=O)O)NC(CCN)=O	13.56	14.3447	0.784679	0.784679	train	,,,
	D-GALACTOSE	C(O)C1C(O)C(O)C(O)C(O)O1	5.06	5.84551	0.785505	0.785505	train	sugars,,,
	L-PROLINE	O=C(O)C1CCCN1	4.94	5.72707	0.787072	0.787072	train	,,carboxylic_acids,
	BIOTIN	C(CCCC(=O)O)C1C2C(CS1)NC(=O)N2	8.32	9.1072	0.7872	0.7872	train	,,,
	2-OXOADIPATE	C(CCC(=O)O)C(=O)C(=O)O	24.02	24.8325	0.812477	0.812477	test	,,carboxylic_acids,
	L-ASPARTATE	C(C(=O)O)C(C(=O)O)N	17.96	18.7732	0.813245	0.813245	train	,,carboxylic_acids,
	L-RHAMNOSE	C1(C(C(C(C)OC1O)O)O)O	3.29	4.10594	0.81594	0.81594	test	sugars,,,
	CHENODEOXYCHOLATE	C12C3C(C4(C(CC3O)CC(CC4)O)C)CCC1(C(C(CCC(=O)O)C)CC2)C	6.39	7.2066	0.816604	0.816604	train	,,carboxylic_acids,
	GLYCOCHOLATE	C1(CCC2(C(C1)CC(C1C2CC(C2(C1CCC2C(CCC(=O)NCC(=O)O)C)C)O)O)C)O	8.64	9.46007	0.820066	0.820066	train	,,carboxylic_acids,
	GLYCERATE	C(O)C(C(=O)O)O	6.89	7.71127	0.821268	0.821268	train	,,carboxylic_acids,
	HIPPURATE	c1ccccc1C(=O)NCC(=O)O	6.06	6.88477	0.824774	0.824774	train	,,carboxylic_acids,
	6-DEOXY-L-GALACTOSE	C1(C(O)C(O)OC(C1O)C)O	3.28	4.10594	0.825939	0.825939	train	sugars,,,
	3-DEHYDROSHIKIMATE	O=C(O)C=1CC(O)C(O)C(=O)C1	8.48	9.31235	0.832347	0.832347	train	,,,
	L-ARGININE	C(CCCN=C(N)N)(C(=O)O)N	19.14	18.3031	-0.836935	0.836935	train	,,,
	L-NORVALINE	C(CC)C(C(=O)O)N	5.81	6.64834	0.838339	0.838339	train	,,carboxylic_acids,
	L-ALANINE	CC(C(=O)O)N	7.33	8.16893	0.838933	0.838933	train	,,carboxylic_acids,
	NORLEUCINE	C(CCCC)(C(=O)O)N	5.4	6.23901	0.83901	0.83901	train	,,carboxylic_acids,
	SUBERIC ACID	C(CCCCCC(=O)O)C(=O)O	22.25	23.0894	0.839407	0.839407	train	,,carboxylic_acids,
	D-(-)-3-PHOSPHOGLYCERIC ACID	C(C(C(O)=O)O)OP(=O)(O)O	38.31	37.4675	-0.842544	0.842544	train	,,carboxylic_acids,
	D-SORBITOL	C(O)C(O)C(O)C(O)C(CO)O	4.74	5.60723	0.867231	0.867231	train	sugars,,,
	D-GLUCURONOLACTONE	C1(C(C(O)C(=O)O1)O)C(O)C=O	2.79	3.65839	0.868392	0.868392	train	,,,isomer
	4-METHYLCATECHOL	c1c(ccc(c1O)O)C	2.32	3.19237	0.872367	0.872367	train	,,,
	(R)-MALATE	C(C(=O)O)C(O)C(=O)O	24.68	25.5704	0.890356	0.890356	train	,,,
	3-UREIDOPROPIONATE	C(CNC(=O)N)C(=O)O	9.87	10.7693	0.899288	0.899288	train	,,carboxylic_acids,
	LUMICHROME	c1c(C)c(cc2nc3c(=O)[nH]c(=O)[nH]c3nc12)C	3.51	4.41009	0.900091	0.900091	train	,,,
	MONO-METHYL GLUTARATE	C(CCC(=O)O)C(=O)OC	4.7	5.60901	0.909005	0.909005	train	,,carboxylic_acids,isomer
	THYMIDINE	C(O)C1C(CC(O1)n1c(=O)[nH]c(=O)c(C)c1)O	2.64	3.55489	0.914886	0.914886	train	sugars,,,
	PYRROLE-2-CARBOXYLATE	c1cc[nH]c1C(=O)O	6.77	7.68649	0.916487	0.916487	train	,,carboxylic_acids,isomer
	2-HYDROXYPHENYLACETIC ACID	C(c1ccccc1)(O)C(=O)O	4.65	5.57294	0.922945	0.922945	train	,,carboxylic_acids,
	TAURINE	C(CS(=O)(=O)O)N	6.56	7.4868	0.9268	0.9268	train	,,,
	N-ACETYLNEURAMINATE	C(O)C(O)C(O)C1C(C(CC(O)(C(=O)O)O1)O)NC(C)=O	12.49	13.4396	0.949571	0.949571	test	,,carboxylic_acids,
	D-GLUCONATE	C(O)C(O)C(O)C(O)C(C(=O)O)O	10.92	11.8696	0.949591	0.949591	train	,,carboxylic_acids,
	L-HISTIDINE	C(Cc1cnc[nH]1)(C(=O)O)N	10.47	11.4206	0.950552	0.950552	train	,,carboxylic_acids,
	(S)-MALATE	C(CC(=O)O)(O)C(=O)O	24.61	25.5704	0.960354	0.960354	train	,,carboxylic_acids,
	PHOSPHO(ENOL)PYRUVIC ACID	C(OP(=O)(O)O)(C(O)=O)=C	41.28	42.2435	0.963474	0.963474	test	,,carboxylic_acids,
	2'-DEOXYGUANOSINE 5'-MONOPHOSPHATE	c1nc2c(=O)nc(N)[nH]c2n1C1CC(O)C(COP(=O)(O)O)O1	29.49	28.5139	-0.976146	0.976146	train	,sugarP,,isomer
	5'-METHYLTHIOADENOSINE	c1nc2c(N)ncnc2n1C1C(O)C(O)C(CSC)O1	3	3.98099	0.980993	0.980993	train	sugars,,,
	L-ANSERINE	C(Cc1cncn1C)(C(=O)O)NC(CCN)=O	9.94	10.9286	0.988624	0.988624	train	,,,
	3ALPHA-HYDROXY-5BETA-CHOLANATE	C12C(C3C(C(C(CCC(=O)O)C)CC3)(C)CC2)CCC2C1(C)CCC(C2)O	5.27	6.25865	0.988647	0.988647	train	,,,
	PYRIDOXINE	c1c(CO)c(CO)c(c(C)n1)O	3.43	4.41887	0.988867	0.988867	test	,,,isomer
	ADENOSINE-5'-DIPHOSPHOGLUCOSE	OC1C(n2c3c(nc2)c(N)ncn3)OC(C1O)COP(OP(OC1OC(CO)C(C(C1O)O)O)(=O)O)(=O)O	39.92	40.9119	0.991942	0.991942	train	,sugarP,,
	INOSINE	c1nc2c(=O)nc[nH]c2n1C1C(O)C(O)C(CO)O1	5.92	6.9125	0.992502	0.992502	train	sugars,,,
	N-ACETYL-D-GALACTOSAMINE	C1(C(C(C(CO)OC1O)O)O)NC(C)=O	4.05	5.0516	1.0016	1.0016	train	sugars,,,
	NALPHA-ACETYL-L-LYSINE	C(CCCN)C(C(=O)O)NC(C)=O	9.34	10.3431	1.0031	1.0031	train	,,,
	NICOTINATE	c1ccncc1C(=O)O	6.53	7.54361	1.01361	1.01361	train	,,carboxylic_acids,
	DIHYDROXYMANDELIC ACID	c1c(ccc(c1O)O)C(O)C(=O)O	7.31	8.32923	1.01923	1.01923	train	,,carboxylic_acids,
	10-HYDROXYDECANOATE	C(CCCCCCCCC(=O)O)O	5.15	6.17065	1.02065	1.02065	train	,,,
	(S)-LACTATE	C(C)(O)C(=O)O	5.64	6.66554	1.02554	1.02554	train	,,carboxylic_acids,
	LAURIC ACID	C(CCCCCCCCCC)C(=O)O	3.18	4.21024	1.03024	1.03024	train	,,carboxylic_acids,
	L-KYNURENINE	c1cccc(c1C(CC(C(=O)O)N)=O)N	6.53	7.56941	1.03941	1.03941	test	,,,
	D-GLUCOSAMINE 6-SULFATE	C1(C(C(C(COS(=O)(=O)O)OC1O)O)O)N	10.58	11.6196	1.03959	1.03959	train	,sugarP,,
	1-HYDROXY-2-NAPHTHOATE	c1cccc2ccc(c(O)c12)C(=O)O	5.33	6.37385	1.04385	1.04385	train	,,carboxylic_acids,
	HOMOCYSTINE	C(CCSSCCC(C(=O)O)N)(C(=O)O)N	19.83	18.782	-1.04797	1.04797	test	,,,
	KYNURENINE	C(CC(c1ccccc1N)=O)(C(=O)O)N	6.52	7.56941	1.04941	1.04941	train	,,carboxylic_acids,
	URIDINE	C(O)C1C(O)C(O)C(O1)n1c(=O)[nH]c(=O)cc1	3.72	4.78118	1.06118	1.06118	test	sugars,,,
	GLUCONIC ACID	C(C(C(CO)O)O)(C(O)C(=O)O)O	10.8	11.8696	1.06959	1.06959	train	sugars,,,
	BETA-ALANINE	C(CN)C(=O)O	8.07	9.14985	1.07985	1.07985	test	,,carboxylic_acids,
	CORTISOL	C12C3C(C4(C)CCC(=O)C=C4CC3)C(CC1(C(CC2)(O)C(CO)=O)C)O	2.17	3.2668	1.0968	1.0968	test	,,,
	STACHYOSE	O(C1(CO)OC(C(C1O)O)CO)C1OC(COC2OC(COC3OC(CO)C(C(C3O)O)O)C(C(C2O)O)O)C(C(C1O)O)O	19.96	21.0576	1.09756	1.09756	train	,,,
	PHENYLACETIC ACID	c1ccccc1CC(=O)O	7.4	6.2988	-1.1012	1.1012	train	,,,
	4-HYDROXYBENZALDEHYDE	c1cc(ccc1O)C=O	2.5	3.60996	1.10996	1.10996	train	,,,
	2',4'-DIHYDROXYACETOPHENONE	c1cc(cc(c1C(C)=O)O)O	2.37	3.48147	1.11147	1.11147	train	,,,
	L-2-PHOSPHOGLYCERIC ACID	C(OP(=O)(O)O)(C(O)=O)CO	36.43	35.3121	-1.1179	1.1179	train	,,carboxylic_acids,
	INDOLE-3-ACETALDEHYDE	C(C(S(=O)(=O)O)O)c1c2c([nH]c1)cccc2	2.19	3.30841	1.11841	1.11841	train	,,,
	MALEAMATE	O=C(O)C=CC(=O)N	6.67	7.79679	1.12679	1.12679	train	,,carboxylic_acids,
	TRANS-CINNAMATE	c1ccccc1/C=C/C(=O)O	5.73	6.85814	1.12814	1.12814	test	,,carboxylic_acids,
	PALMITOLEIC ACID	C(CCCCCCC(=O)O)C=CCCCCCC	2.7	3.83428	1.13428	1.13428	train	,,carboxylic_acids,
	D-GLUCONO-1,5-LACTONE	C(O)C1C(O)C(O)C(O)C(=O)O1	3.49	4.62672	1.13672	1.13672	test	sugars,,,
	DEOXYCHOLATE	C12C(C3(C(CC2)CC(CC3)O)C)CC(C2(C1CCC2C(CCC(=O)O)C)C)O	6.22	7.36198	1.14198	1.14198	train	,,carboxylic_acids,
	3ALPHA,12ALPHA-DIHYDROXY-5BETA-CHOLANATE	C12C3C(C(C(CCC(=O)O)C)CC3)(C(CC1C1(C(CC2)CC(CC1)O)C)O)C	6.22	7.36198	1.14198	1.14198	train	,,carboxylic_acids,
	GUANOSINE	c1nc2c(=O)nc(N)[nH]c2n1C1C(O)C(O)C(CO)O1	8.31	9.45406	1.14406	1.14406	train	sugars,,,
	DEOXYURIDINE	C(O)C1C(CC(O1)n1c(=O)[nH]c(=O)cc1)O	2.92	4.06794	1.14794	1.14794	train	sugars,,,
	D-Gulono-1,4-lactone	C(O)C(O)C1C(O)C(O)C(=O)O1	3.38	4.52819	1.14819	1.14819	train	sugars,,,
	D-LYXOSE	C(O)C(O)C(O)C(O)C=O	3.85	5.00048	1.15048	1.15048	test	sugars,,,
	QUINATE	O=C(O)C1(CC(O)C(O)C(C1)O)O	8.85	10.0028	1.15281	1.15281	train	,,carboxylic_acids,
	S-HEXYL-GLUTATHIONE	C(CSCCCCCC)(C(=O)NCC(=O)O)NC(CCC(C(=O)O)N)=O	15.91	17.0724	1.16241	1.16241	train	,,carboxylic_acids,
	HOMOSERINE	C(CCO)(C(=O)O)N	8.26	9.42333	1.16333	1.16333	train	,,carboxylic_acids,
	ADENOSINE 5'-DIPHOSPHORIBOSE	OC1C(n2c3c(nc2)c(N)ncn3)OC(C1O)COP(OP(OCC(C(C(C=O)O)O)O)(=O)O)(=O)O	36.25	37.4231	1.17307	1.17307	train	,sugarP,,
	MALONATE	C(C(=O)O)C(=O)O	11.33	12.5054	1.17545	1.17545	train	,,carboxylic_acids,
	NAD (Nicotinamide adenine dinucleotide)	c1nc2c(N)ncnc2n1C1C(O)C(O)C(COP(=O)(O)OP(=O)(OCC2C(O)C(O)C(O2)[n+]2cc(ccc2)C(=O)N)[O-])O1	25.63	26.8325	1.20252	1.20252	train	,sugarP,,
	DETHIOBIOTIN	C(CCCCC(=O)O)C1C(C)NC(=O)N1	6.84	8.04525	1.20525	1.20525	train	,,,
	MYRISTIC ACID	C(CCCCCCCC)CCCCC(=O)O	2.88	4.0948	1.2148	1.2148	train	,,carboxylic_acids,
	FERULATE	c1c(ccc(c1OC)O)C=CC(=O)O	7.8	9.01686	1.21686	1.21686	train	,,carboxylic_acids,
	TRICOSANOIC ACID	C(CCCCCCCCCCCCCCCCCCCCC)C(=O)O	2.2	3.41689	1.21689	1.21689	test	,,carboxylic_acids,
	THYMIDINE 5'-MONOPHOSPHATE	C(OP(=O)(O)O)C1C(CC(O1)n1c(=O)[nH]c(=O)c(C)c1)O	20.9	22.1302	1.23022	1.23022	test	,sugarP,,
	OLEATE	C(CCCCCCC=CCCCCCCCC)C(=O)O	2.52	3.75245	1.23245	1.23245	train	,,carboxylic_acids,
	ARACHIDIC ACID	C(CCCCCCCCCCCC)CCCCCCC(=O)O	2.32	3.56286	1.24286	1.24286	train	,,carboxylic_acids,
	HEPTADECANOATE	C(CCCCCCCCCCC)CCCCC(=O)O	2.54	3.79603	1.25603	1.25603	train	,,carboxylic_acids,
	STEARATE	C(CCCCCCCCCCC)CCCCCC(=O)O	2.46	3.71694	1.25694	1.25694	train	,,carboxylic_acids,
	3-METHYLGLUTARIC ACID	C(C(=O)O)C(CC(=O)O)C	21.25	22.5079	1.25794	1.25794	train	,,carboxylic_acids,isomer
	PALMITATE	C(CCCCCCCCCC)CCCCC(=O)O	2.65	3.91308	1.26308	1.26308	train	,,carboxylic_acids,
	PETROSELINIC ACID	C(CCCC=CCCCCCCCCCCC)C(=O)O	2.46	3.72638	1.26638	1.26638	test	,,carboxylic_acids,
	THYMIDINE 5'-MONOPHOSPHATE	O=c1n(C2OC(C(C2)O)COP(=O)(O)O)cc(c([nH]1)=O)C	20.86	22.1302	1.27022	1.27022	train	,sugarP,,
	NERVONIC ACID	C(CCCCCCC=CCCCCCCCC)CCCCCCC(=O)O	2.2	3.48718	1.28718	1.28718	train	,,carboxylic_acids,
	DOCOSAHEXAENOIC ACID	C(C=CCC=CCCC(=O)O)C=CCC=CCC=CCC=CCC	2.38	3.67052	1.29052	1.29052	train	,,carboxylic_acids,
	ERUCIC ACID	C(CCCCCCC=CCCCCCCCCCCCC(=O)O)C	2.23	3.52235	1.29235	1.29235	test	,,carboxylic_acids,
	D-(+)-GALACTURONIC ACID	C1(C(C(C(=O)O)OC(C1O)O)O)O	13.81	15.1112	1.30116	1.30116	train	sugars,,carboxylic_acids,
	ELAIDIC ACID	C(CCCCCCC=CCCCCCCCC)C(=O)O	2.45	3.75245	1.30245	1.30245	train	,,carboxylic_acids,
	4-METHYL-2-OXOVALERIC ACID	C(C(=O)C(=O)O)C(C)C	3.86	5.16349	1.30349	1.30349	test	,,carboxylic_acids,
	BETA-NICOTINAMIDE ADENINE DINUCLEOTIDE PHOSPHATE	O(P(=O)(O)O)C1C(OC(C1O)COP(OP(OCC1OC(C(C1O)O)[n+]1cc(C(N)=O)ccc1)(=O)[O-])(=O)O)n1c2c(nc1)c(N)ncn2	35.16	36.468	1.30799	1.30799	train	,sugarP,,
	3-HYDROXYBENZALDEHYDE	c1ccc(cc1O)C=O	2.17	3.50158	1.33158	1.33158	train	,,,
	N-METHYL-D-ASPARTIC ACID	C(CC(=O)O)(C(=O)O)NC	11.66	13.024	1.36396	1.36396	train	,,carboxylic_acids,isomer
	CITRAMALATE	C(C(=O)O)C(C)(O)C(=O)O	20.08	21.4515	1.37152	1.37152	train	,,carboxylic_acids,
	ITACONATE	C(C(C(=O)O)=C)C(=O)O	15.98	17.3614	1.38139	1.38139	train	,,carboxylic_acids,isomer
	ALLOSE	C1(C(C(CO)OC(C1O)O)O)O	4.46	5.8455	1.3855	1.3855	train	sugars,,,
	N(PAI)-METHYL-L-HISTIDINE	c1c(CC(C(=O)O)N)ncn1C	6.11	7.57437	1.46437	1.46437	test	,,carboxylic_acids,
	D-MANNOSAMINE	C(C(C(C(=O)O)N)O)(C(CO)O)O	5	6.46668	1.46668	1.46668	train	sugars,,,
	METHYL BETA-D-GALACTOSIDE	C1(C(C(C(C(CO)O1)O)O)O)OC	3.03	4.5172	1.4872	1.4872	test	sugars,,,
	SELENOMETHIONINE	C[Se]CCC(C(=O)O)N	6.25	7.7756	1.5256	1.5256	test	,,,
	THYMIDINE-5'-DIPHOSPHO-ALPHA-D-GLUCOSE	O=c1n(C2OC(C(C2)O)COP(OP(OC2OC(CO)C(C(C2O)O)O)(=O)O)(=O)O)cc(c([nH]1)=O)C	35.22	36.7469	1.52688	1.52688	train	,sugarP,,
	ISOCITRIC ACID	C(C(=O)O)C(C(=O)O)C(O)C(=O)O	32.96	34.507	1.547	1.547	test	,,carboxylic_acids,
	HYDROQUINONE	c1cc(ccc1O)O	7.3	5.74994	-1.55006	1.55006	train	,,,
	INDOLE-3-ACETAMIDE	c1cccc2c1c(c[nH]2)CC(=O)N	2.28	3.84378	1.56378	1.56378	train	,,,
	SALICYLAMIDE	c1cccc(c1C(=O)N)O	2.23	3.81345	1.58345	1.58345	train	,,,
	GUAIACOL	c1cccc(c1OC)O	4.65	3.06264	-1.58736	1.58736	train	,,,
	GLYCOLATE	C(O)C(=O)O	6.42	8.06432	1.64432	1.64432	test	,,carboxylic_acids,
	ETHANOLAMINE PHOSPHATE	C(CC(=O)O)C(CN)=O	7.35	8.99554	1.64554	1.64554	train	,,carboxylic_acids,
	GUANIDINOACETATE	C(NC(=N)N)C(O)=O	10.28	8.61033	-1.66967	1.66967	test	,,carboxylic_acids,
	METHYLMALONATE	CC(C(=O)O)C(=O)O	9.5	11.1922	1.69219	1.69219	test	,,carboxylic_acids,isomer
	URACIL	O=c1cc[nH]c(=O)[nH]1	2.93	4.64872	1.71872	1.71872	test	sugars,,,
	N-METHYL-L-GLUTAMATE	C(CCC(O)=O)(C(O)=O)NC	10.6	12.3335	1.73354	1.73354	train	,,carboxylic_acids,
	ACETOIN	CC(O)C(C)=O	7.43	5.68704	-1.74296	1.74296	test	,,carboxylic_acids,isomer
	2,5-DIHYDROXYBENZOATE	c1c(c(ccc1O)O)C(=O)O	7.29	9.17385	1.88385	1.88385	train	,,carboxylic_acids,isomer
	3-HYDROXYBENZYL ALCOHOL	c1c(cccc1O)CO	2.37	4.2805	1.9105	1.9105	test	,,,
	2'-DEOXYURIDINE 5'-MONO-PHOS-PHATE	C1(CC(C(COP(=O)(O)O)O1)O)n1c(=O)[nH]c(=O)cc1	22.59	24.6048	2.01485	2.01485	test	,sugarP,,
	3-HYDROXYPHENYLACETATE	c1c(cccc1O)CC(=O)O	2.38	4.40365	2.02365	2.02365	train	,,,
	N6-(DELTA2-ISOPENTENYL)-ADENINE	c1nc2ncnc(NCC=C(C)C)c2[nH]1	2.5	4.64567	2.14567	2.14567	test	,,,
	D-(+)-RAFFINOSE	C1(C(C(C(CO)O1)O)O)(CO)OC1C(C(C(C(COC2C(C(C(C(CO)O2)O)O)O)O1)O)O)O	13.67	16.0403	2.37034	2.37034	test	,,,
	ALLANTOIN	O=C1C(NC(=O)N)NC(=O)N1	4.74	7.1361	2.3961	2.3961	test	,,,
	CITRULLINE	C(CCNC(=O)N)C(C(=O)O)N	11.68	14.3951	2.7151	2.7151	train	,,carboxylic_acids,
	2,3-DIHYDROXYBENZOATE	c1ccc(c(c1C(=O)O)O)O	6.24	9.12417	2.88417	2.88417	test	,,carboxylic_acids,isomer
	SALICYLATE	c1cccc(c1C(=O)O)O	8.84	5.93253	-2.90747	2.90747	train	,,carboxylic_acids,
	D-SACCHARIC ACID	O=C(O)C(O)C(O)C(O)C(O)C(=O)O	32.34	29.3921	-2.94791	2.94791	train	,,carboxylic_acids,
	PHOSPHONOACETATE	C(C(=O)O)P(=O)(O)O	31.32	34.3764	3.05641	3.05641	test	,,carboxylic_acids,
	GALACTARATE	O=C(O)C(O)C(O)C(O)C(O)C(=O)O	32.58	29.3921	-3.18791	3.18791	train	,,carboxylic_acids,
	4-IMIDAZOLEACETIC ACID	c1c(CC(=O)O)[nH]cn1	9.78	6.30609	-3.47391	3.47391	test	,,,isomer
	D-PANTOTHENIC ACID	C(O)C(C)(C)C(C(=O)NCCC(=O)O)O	7.09	10.567	3.47702	3.47702	test	,,carboxylic_acids,
	O-SUCCINYL-L-HOMOSERINE	C(CC(=O)O)C(=O)OCCC(C(=O)O)N	16.95	20.456	3.50597	3.50597	test	,,carboxylic_acids,
	2,6-DIHYDROXYPYRIDINE	O=c1cccc(O)[nH]1	8.03	4.4003	-3.6297	3.6297	test	,,,isomer
	4-PYRIDOXATE	c1c(CO)c(c(c(C)n1)O)C(=O)O	4.9	8.84011	3.94011	3.94011	test	,,carboxylic_acids,
	L-TRYPTOPHANAMIDE	C(Cc1c[nH]c2ccccc12)(C(=O)N)N	2.44	6.61148	4.17148	4.17148	test	,,,
	PROPENOATE	O=C(O)C=C	3.8	8.04538	4.24538	4.24538	test	,,carboxylic_acids,
	XANTHINE	c1nc2c(c(=O)[nH]c(=O)[nH]2)[nH]1	9.2	4.85609	-4.34391	4.34391	test	sugars,,,
	3-(2-HYDROXYPHENYL)PROPANOATE	c1cccc(c1CCC(=O)O)O	5.08	9.85788	4.77788	4.77788	test	,,carboxylic_acids,
	GLUTARIC ACID	O=C(C(O)C(O)C(O)C(O)C(=O)O)O	23.51	29.3921	5.8821	5.8821	train	,,carboxylic_acids,isomer
	L-HISTIDINOL	C(Cc1cnc[nH]1)(CO)N	5	11.0469	6.04689	6.04689	test	,,carboxylic_acids,
	3,4-DIHYDROXYBENZOATE	c1c(ccc(c1O)O)C(=O)O	23.5	16.9625	-6.53747	6.53747	test	,,carboxylic_acids,isomer
	URIDINE 5'-DIPHOSPHATE	C1(C(O)C(C(COP(=O)(O)OP(=O)([O-])[O-])O1)O)n1c(=O)[nH]c(=O)cc1	44.79	38.0162	-6.77385	6.77385	test	,sugarP,,
	3-METHOXY-L-TYROSINE	C(Cc1cc(c(cc1)O)OC)(C(=O)O)N	7.34	14.6539	7.31389	7.31389	test	,,carboxylic_acids,
	D-FRUCTOSE 6-PHOSPHATE	C(C(C(CO)O)O)(O)C(COP(=O)([O-])[O-])=O	25.37	33.7262	8.35622	8.35622	test	,sugarP,,
	3-METHYL-2-OXINDOLE	c1cccc2c1C(C)C(=O)N2	11.92	3.22991	-8.69009	8.69009	test	,,,
	2-AMINOPHENOL	c1cccc(c1N)O	13.16	4.38375	-8.77625	8.77625	test	,,,
	2-METHYLMALEATE	CC(C(=O)O)=CC(=O)O	5.07	14.2817	9.21169	9.21169	test	,,carboxylic_acids,isomer
	CAFFEATE	c1c(c(ccc1C=CC(=O)O)O)O	23.49	13.794	-9.69599	9.69599	test	,,carboxylic_acids,isomer
	THIAMINE PYROPHOSPHATE	c1c(C[n+]2csc(CCOP(=O)(O)OP(=O)(O)O)c2C)c(N)nc(C)n1	25.7	35.8148	10.1148	10.1148	test	,sugarP,,
	FUMARATE	O=C(O)C=CC(=O)O	30.23	17.9759	-12.2541	12.2541	train	,,carboxylic_acids,isomer
	MALEIC ACID	O=C(O)C=CC(=O)O	4.79	17.9759	13.1859	13.1859	train	,,carboxylic_acids,isomer
	N-ALPHA-ACETYL-L-ASPARAGINE	C(C(=O)N)C(C(=O)O)NC(C)=O	8.15	21.5988	13.4488	13.4488	test	,,carboxylic_acids,
	L-CYSTEIC ACID	C(CS(=O)(=O)[O-])(C(=O)[O-])[NH3+]	17.38	31.832	14.452	14.452	test	,,,

## Sheet: Isomers only
CNAME	neg RT (min)	corr M-H
BUTANOATE	5.31498	87.0452
ACETOIN	7.42657	87.0452
SARCOSINE	5.6357	88.0404
L-ALANINE	7.3337	88.0404
D-ALANINE	7.4013	88.0404
BETA-ALANINE	8.0658	88.0404
(S)-LACTATE	5.6382	89.0244
GLYCERALDEHYDE	5.6528	89.0244
2-AMINO-2-METHYLPROPANOATE	6.3784	102.056
3-AMINOISOBUTANOATE	6.5317	102.056
ALPHA-HYDROXYISOBUTYRIC ACID	5.0082	103.04
2-HYDROXYBUTYRIC ACID	5.2712	103.04
GLYCERATE	6.8852	105.019
D-GLYCERIC ACID	6.9536	105.019
PYRROLE-2-CARBOXYLATE	6.77	110.025
2,6-DIHYDROXYPYRIDINE	8.0276	110.025
MALEAMATE	6.6727	114.02
L-PROLINE	4.9407	114.056
MALEIC ACID	4.7861	115.004
FUMARATE	30.2272	115.004
L-VALINE	5.7654	116.072
L-NORVALINE	5.8138	116.072
METHYLMALONATE	9.502	117.019
SUCCINATE	20.1145	117.019
L-THREONINE	7.4566	118.051
L-ALLOTHREONINE	7.6582	118.051
HOMOSERINE	8.2626	118.051
3-HYDROXYBENZALDEHYDE	2.1687	121.029
4-HYDROXYBENZALDEHYDE	2.5011	121.029
BENZOATE	5.6077	121.029
BENZOATE	5.63	121.029
4-METHYLCATECHOL	2.3219	123.045
3-HYDROXYBENZYL ALCOHOL	2.3742	123.045
GUAIACOL	4.6495	123.045
THYMINE	2.6227	125.036
4-IMIDAZOLEACETIC ACID	9.7799	125.036
5-OXO-L-PROLINE	7.2863	128.035
5-OXO-D-PROLINE	7.2943	128.035
L-PIPECOLIC ACID	5.0182	128.072
PIPECOLATE	5.0233	128.072
2-METHYLMALEATE	5.07433	129.019
ITACONATE	15.9758	129.019
4-METHYL-2-OXO-PENTANOIC ACID	3.8572	129.056
4-METHYL-2-OXOVALERIC ACID	3.8576	129.056
3-METHYL-2-OXOVALERIC ACID	3.9418	129.056
N-ACETYL-L-ALANINE	5.9251	130.051
CIS-4-HYDROXY-D-PROLINE	7.0933	130.051
TRANS-4-HYDROXYPROLINE	7.1294	130.051
4-HYDROXY-L-PROLINE	7.1296	130.051
5-AMINOLEVULINIC ACID	7.3463	130.051
LEUCINE	5.2262	130.087
L-ISOLEUCINE	5.3937	130.087
NORLEUCINE	5.4044	130.087
ETHYLMALONIC ACID	7.4688	131.035
GLUTARATE	23.4863	131.035
GLUTARIC ACID	23.5097	131.035
L-ASPARAGINE	9.2104	131.046
3-UREIDOPROPIONATE	9.8698	131.046
L-ASPARTATE	17.9618	132.03
D-ASPARTATE	18.1888	132.03
(S)-MALATE	24.606	133.014
(R)-MALATE	24.6785	133.014
ADENINE	4.8054	134.047
ADENINE	4.8549	134.047
SALICYLAMIDE	2.2291	136.04
ANTHRANILATE	6.15732	136.04
4-AMINOBENZOATE	7.48522	136.04
SALICYLATE	8.8356	137.024
3-HYDROXYBENZOATE	9.09477	137.024
4-HYDROXYBENZOATE	9.8969	137.024
ETHANOLAMINE PHOSPHATE (duplicate)	21.6852	140.012
2-AMINOETHYL DIHYDROGEN PHOSPHATE	21.6862	140.012
MONO-METHYL GLUTARATE	4.69848	145.051
3-METHYLGLUTARIC ACID	21.2505	145.051
2-METHYLGLUTARIC ACID	22.9942	145.051
ADIPIC ACID	23.4868	145.051
O-ACETYL-L-SERINE	6.9133	146.046
N-ACETYL-DL-SERINE	7.0372	146.046
N-METHYL-D-ASPARTIC ACID	11.6564	146.046
L-GLUTAMIC ACID	17.1273	146.046
L-METHIONINE	6.0883	148.044
2-HYDROXY-4-(METHYLTHIO)BUTYRIC ACID	5.01	148.044
MESO-TARTARIC ACID	30.81	149.009
(R,R)-TARTARIC ACID	31.6067	149.009
(S,S)-TARTARIC ACID	31.6985	149.009
D-RIBOSE	3.2575	149.046
D-(-)-ARABINOSE	3.8222	149.046
ARABINOSE	3.8337	149.046
D-LYXOSE	3.84763	149.046
D-XYLOSE	4.02278	149.046
2',4'-DIHYDROXYACETOPHENONE	2.3705	151.04
3-HYDROXYPHENYLACETATE	2.3799	151.04
RESORCINOL MONOACETATE	2.3815	151.04
2-HYDROXYPHENYLACETIC ACID	4.6495	151.04
MANDELIC ACID	5.10327	151.04
4-HYDROXYPHENYLACETATE	8.63427	151.04
XYLITOL	3.9637	151.061
RIBITOL	4.0338	151.061
L-ARABITOL	4.18	151.061
3-HYDROXYANTHRANILATE	9.7241	152.035
3-AMINO-5-HYDROXYBENZOIC ACID	12.3991	152.035
3-AMINO-4-HYDROXYBENZOIC ACID	13.1486	152.035
2,3-DIHYDROXYBENZOATE	6.2443	153.019
2,5-DIHYDROXYBENZOATE	7.2903	153.019
3,4-DIHYDROXYBENZOATE	23.5015	153.019
L-HISTIDINE	10.4688	154.062
L-HISTIDINE	10.7587	154.062
OROTATE	7.8671	155.01
OROTIC ACID	7.95	155.01
2,4-DIHYDROXYPYRIMIDINE-5-CARBOXYLIC ACID	9.0455	155.01
PHENYLPYRUVATE	4.1292	163.04
4-COUMARATE	10.2484	163.04
6-DEOXY-L-GALACTOSE	3.2811	163.061
L-RHAMNOSE	3.29	163.061
2-DEOXY-D-GLUCOSE	5.2175	163.061
PHOSPHO(ENOL)PYRUVIC ACID	41.284	166.975
PHOSPHO(ENOL)PYRUVIC ACID	41.428	166.975
HOMOGENTISATE	7.4674	167.035
3,4-DIHYDROXYPHENYLACETATE	8.048	167.035
PYRIDOXINE	3.4338	168.067
NORADRENALINE	24.1292	168.067
GLYCEROL 2-PHOSPHATE	22.5145	171.006
SN-GLYCEROL 3-PHOSPHATE	23.28	171.006
4-QUINOLINECARBOXYLIC ACID	6.6892	172.04
2-QUINOLINECARBOXYLIC ACID	6.9761	172.04
DEHYDROASCORBATE	6.0215	173.009
TRANS-ACONITATE	36.0777	173.009
INDOLE-3-ACETATE	7.3323	174.056
INDOLE-3-ACETIC ACID	7.3625	174.056
D-GLUCURONOLACTONE	2.7913	175.025
ASCORBATE	9.7925	175.025
D-GULONIC ACID GAMA-LACTONE	3.38	177.04
D-GLUCONO-1,5-LACTONE	3.4892	177.04
D-MANNOSAMINE	4.9974	178.072
D-(+)-GLUCOSAMINE	5.4934	178.072
3-(4-HYDROXYPHENYL)PYRUVATE	2.499	179.035
CAFFEATE	23.4863	179.035
D-PSICOSE	3.78	179.056
D-TAGATOSE	4.31228	179.056
ALLOSE	4.46125	179.056
L-SORBOSE	4.58732	179.056
D-SORBITOL	4.7445	179.056
D-GALACTOSE	5.05872	179.056
MANNOSE	5.07748	179.056
ALPHA-D-GLUCOSE	5.34008	179.056
MYO-INOSITOL	6.54402	179.056
D-FRUCTOSE	4.23	179.056
METHYL VANILLATE	1.7718	181.051
HOMOVANILLATE	6.7737	181.051
3-(4-HYDROXYPHENYL)LACTATE	7.4311	181.051
MANNITOL	4.9657	181.072
GALACTITOL	5.2175	181.072
O-PHOSPHO-L-SERINE	29.3103	184.002
O-PHOSPHO-DL-SERINE	29.3323	184.002
L-2-PHOSPHOGLYCERIC ACID	36.43	184.986
D-(-)-3-PHOSPHOGLYCERIC ACID	38.311	184.986
ISOCITRIC ACID	32.9643	191.02
CITRATE	36.3248	191.02
D-(+)-GALACTURONIC ACID	13.81	193.035
D-GLUCURONIC ACID	13.8823	193.035
GLUCONIC ACID	10.8006	195.051
D-GLUCONATE	10.92	195.051
L-TRYPTOPHAN	7.7538	203.083
D-TRYPTOPHAN	7.7694	203.083
KYNURENINE	6.5198	207.078
L-KYNURENINE	6.5319	207.078
D-SACCHARIC ACID	32.3397	209.03
GALACTARATE	32.5827	209.03
PHOSPHOCREATINE	30.2385	210.029
CREATINE PHOSPHATE	30.2445	210.029
N-ACETYL-D-GALACTOSAMINE	4.0479	220.083
N-ACETYL-D-MANNOSAMINE	4.2683	220.083
N-ACETYL-D-GLUCOSAMINE	4.377	220.083
D-FRUCTOSE 6-PHOSPHATE	25.3705	259.022
ALPHA-D-GLUCOSE 1-PHOSPHATE	26.4165	259.022
ALPHA-D-GALACTOSE 1-PHOSPHATE	26.4732	259.022
D-MANNOSE 6-PHOSPHATE	26.4732	259.022
D-GLUCOSE 6-PHOSPHATE	26.9803	259.022
D-GLUCOSE-6-PHOSPHATE	26.9833	259.022
ADENOSINE	4.4238	266.089
2'-DEOXYGUANOSINE	6.66	266.089
ELAIDIC ACID	2.4509	281.249
PETROSELINIC ACID	2.4601	281.249
OLEATE	2.5234	281.249
THYMIDINE 5'-MONOPHOSPHATE	20.8628	321.049
THYMIDINE 5'-MONOPHOSPHATE	20.8968	321.049
CMP	26.9205	322.045
3'-CMP	28.06	322.045
ADENOSINE 2',3'-CYCLIC MONOPHOSPHATE	10.6	328.045
ADENOSINE 3',5'-CYCLIC MONOPHOSPHATE	12.2099	328.045
3',5'-CYCLIC AMP	12.3272	328.045
SUCROSE	7.20247	341.109
PALATINOSE	7.5261	341.109
D-LACTOSE	8.03	341.109
D-(+)-CELLOBIOSE	8.1301	341.109
MALTOSE	8.5392	341.109
MELIBIOSE	9.12167	341.109
D-(+)-TREHALOSE	9.39	341.109
ADENOSINE 5'-MONOPHOSPHATE	25.8275	346.056
2'-DEOXYGUANOSINE 5'-MONOPHOSPHATE	29.4932	346.056
INOSINE 5'-MONOPHOSPHATE	27.1018	347.04
INOSINE 5'-PHOSPHATE	27.442	347.04
DEOXYCHOLATE	6.2168	391.285
3ALPHA,12ALPHA-DIHYDROXY-5BETA-CHOLANATE	6.22	391.285
CHENODEOXYCHOLATE	6.39105	391.285
ADENOSINE 3',5'-DIPHOSPHATE	39.9212	426.022
ADENOSINE 5'-DIPHOSPHATE	40.0045	426.022
URIDINE 5'-DIPHOSPHOGLUCOSE	36.498	565.048
URIDINE 5'-DIPHOSPHOGALACTOSE	36.5507	565.048
GUANOSINE 5'-DIPHOSPHO-D-MANNOSE	41.4027	604.07
GUANOSINE 5'-DIPHOSPHOGLUCOSE	41.64	604.07
URIDINE 5'-DIPHOSPHO-N-ACETYLGALACTOSAMINE	35.184	606.074
URIDINE 5'-DIPHOSPHO-N-ACETYLGLUCOSAMINE	35.2508	606.074
