# Supplementary material for: Coupling Mixed Mode Chromatography/ESI Negative MS Detection with Message-Passing Neural Network Modeling for Enhanced Metabolome Coverage and Structural Identification
Source: Metabolites. 2021 Nov 11;11(11):772. doi: 10.3390/metabo11110772 (PMC8620857; doi:10.3390/metabo11110772)
Supplement: Supplementary file 1 [file metabolites-11-00772-s001.zip › Xing et al Table S4.xlsx]

## Sheet: XCMS output
featureidx	MSMS	fold	log2fold	tstat	pvalue	qvalue	updown	mzmed	mzmin	mzmax	rtmed	rtmin	rtmax	maxint	dataset1_mean	dataset1_sd	dataset2_mean	dataset2_sd	isotopes	adducts	peakgroup	metlin	name	METLIN_MSMS	usernotes
1		21.0583	-4.39632	-49.2462	2.72415e-06	0.00534367	DOWN	427.034	427.033	427.034	17.0492	17.0477	17.1103	32973.7	124961	2462.43	5934.06	3385.53			153		M427T17_1	y
2		54.3044	-5.763	-39.9006	1.26149e-05	0.00945251	DOWN	342.944	342.943	342.944	36.4632	36.4528	36.4975	13329.5	185390	6696.47	3149.34	4211.85		[M+Cl+NaCOOH]- 239.986 [M-H+NaCOOH]- 275.963	160		M343T36	y
3		28.8005	-4.84802	-47.9886	2.14019e-05	0.0103527	DOWN	331.015	331.014	331.015	18.4233	18.3363	18.5378	147457	2.81738e+06	87426.9	97824.1	44624.3		[2M-2H+Na]- 155.024	29		M331T18	y
4		6.79541	-2.76456	-30.9587	2.30956e-05	0.0104575	DOWN	259.023	259.022	259.023	27.0748	27.0323	27.1867	317117	5.69793e+06	226731	838497	150025		[M+Cl]- 224.054 [M-H]- 260.03	89		M259T27_2	y
5		42.7167	-5.41673	-28.6305	2.71781e-05	0.0106625	DOWN	175.036	175.036	175.036	25.6932	25.6322	25.7772	360586	3.95995e+06	193727	92702.5	131168	[42][M]-	[M+Cl]- 140.067 [M-H]- 176.044	59		M175T26	y
6		5.85031	2.54851	19.6424	3.97495e-05	0.0118075	UP	248.96	248.96	248.96	17.9697	17.904	18.0353	169070	852915	255255	4.98981e+06	260607			37		M249T18_2	n
7		5.19157	2.37617	26.6199	4.28566e-05	0.0120096	UP	124.992	124.991	124.992	5.71518	5.58553	5.90917	288393	454600	67418	2.36009e+06	104050			262		M125T6_1	y
8		9.74811	-3.28512	-15.9487	9.37351e-05	0.0194899	DOWN	266.914	266.914	266.914	20.053	19.9928	20.1223	49035.9	678739	45020	69627.7	48467.4			116		M267T20	n
9		4.68113	-2.22686	-15.892	0.000100648	0.0202185	DOWN	98.025	98.025	98.025	20.4074	20.3588	20.456	445761	4.21572e+06	239904	900578	270173			234		M98T20_1	y
10		16.0166	-4.0015	-46.796	0.000112216	0.0213332	DOWN	327.011	327.01	327.011	27.1023	27.018	27.1867	46279.3	713468	23461.6	44545.4	7908.64		[M+Cl+NaCOOH]- 224.054 [M-H+NaCOOH]- 260.03	89		M327T27	y
11		2.28732	1.19366	15.3185	0.00014117	0.0236612	UP	189.052	189.052	189.052	24.9493	24.9448	25.0077	70710	368378	33662.8	842596	41735.5		[M-H]- 190.06	347		M189T25	y
12		5.05954	2.33901	15.6997	0.000220741	0.0279173	UP	228.065	228.065	228.065	16.1641	16.0996	16.2287	1.93658e+06	3.63003e+06	912079	1.83663e+07	1.34581e+06			36		M228T16	y
13		4.80721	2.2652	43.5763	0.000227351	0.0281787	UP	217.03	217.03	217.03	6.57822	6.55692	6.63993	33067.7	24486.8	3584.88	117713	937.79		[2M-2H+Na]- 98.0269	12		M217T7	y
14		3.95913	-1.98518	-21.0418	0.000255778	0.0291934	DOWN	345.03	345.03	345.03	18.6047	18.5072	18.7022	32186.7	304280	8448.15	76855.3	16705.7			226		M345T19	y
15		9.92932	-3.31169	-48.997	0.000260842	0.0293576	DOWN	145.014	145.014	145.015	24.7815	24.6528	24.83	517746	1.02906e+07	321343	1.03638e+06	61294.7	[27][M]-	[M-H]- 146.018	103		M145T25	y
16		2.71757	1.44232	17.881	0.000266499	0.0295356	UP	172.01	172.01	172.01	23.1334	22.8565	23.2732	138671	981504	81089.2	2.66731e+06	141739	[35][M+1]-		33		M172T23_1	n
17		5.65248	-2.49888	-13.6334	0.000289949	0.0302191	DOWN	98.0249	98.0248	98.025	20.1161	20.0508	20.1813	514801	6.38385e+06	540011	1.12939e+06	392441			116		M98T20_2	y
18		329.454	-8.36393	-58.3833	0.000292916	0.0302998	DOWN	371.895	371.894	371.895	18.3144	18.2273	18.5028	5.3366e+06	9.15868e+07	2.70874e+06	277996	24589.2			29		M372T18_1	n
19		2.04481	-1.03197	-13.0292	0.000293684	0.0303205	DOWN	289.124	289.123	289.124	20.1217	20.064	20.2837	42903.4	731142	30229.7	357560	39402.2	[101][M+1]-		238		M289T20	n
20		1.43055	0.516573	11.7003	0.0003272	0.0315362	UP	251.071	251.071	251.071	20.4863	20.4267	20.6018	278184	1.90358e+06	80840.3	2.72318e+06	90473.8	[77][M]-		270		M251T20	y
21		7.10793	-2.82943	-14.8907	0.000388235	0.0333799	DOWN	188.906	188.906	188.906	17.7463	17.68	17.8105	338095	3.58803e+06	306616	504793	186025			51		M189T18	n
22		2.8409	-1.50635	-17.4618	0.000389607	0.0334167	DOWN	146.018	146.018	146.018	24.83	24.7777	24.8328	27656.1	445132	25330.3	156687	13303	[27][M+1]-		103		M146T25	n
23		12.4717	3.64059	15.6788	0.000394825	0.0335554	UP	208.953	208.953	208.953	5.63163	5.58553	5.71658	27995.6	13365.7	14995.7	169992	8632.1		[M+Cl]- 173.989	354		M209T6_1	y
24		7.37985	2.88359	11.0314	0.000439371	0.0346435	UP	231.024	231.023	231.024	17.3912	17.3748	17.4075	19336.9	15186.3	9858.92	112073	11585			106		M231T17_2	y
25		1.54369	0.626386	10.7098	0.000460564	0.0351078	UP	188.005	188.005	188.005	5.83108	5.70013	6.0145	27876.2	110304	6458.07	170276	7236.26	[48][M+1]-		41		M188T6	n
26		9.01736	-3.17271	-10.59	0.000477179	0.0354508	DOWN	275.089	275.088	275.089	30.0668	30.05	30.1892	62387.9	337867	36575.5	37203.9	32869.8		[M-H]- 276.096	352		M275T30	y
27		6.43404	-2.68572	-16.6766	0.000517609	0.0362169	DOWN	131.082	131.082	131.083	12.0078	11.8614	12.1067	734841	1.64311e+07	1.28793e+06	2.55378e+06	647022			159		M131T12	y
28		23.5148	-4.5555	-27.7023	0.000545475	0.036695	DOWN	132.03	132.03	132.03	25.6932	25.6322	25.7623	224443	2.67642e+06	153927	113818	44475.8			59		M132T26	y
29		3.21115	1.68309	17.5977	0.000574108	0.0371493	UP	653.052	653.052	653.052	8.85045	8.83208	8.86882	59812	150227	13723.2	482401	29674.6		[M+Cl]- 618.08	71		M653T9	n
30		3.57861	1.8394	15.0167	0.000590027	0.0373873	UP	517.075	517.075	517.076	8.91865	8.6989	8.92697	206173	717009	100059	2.56589e+06	188321		[M+Cl+NaCOOH]- 414.123 [M-H+NaCOOH]- 450.098	71		M517T9_1	y
31		1.98574	0.989677	9.91356	0.000608567	0.0376522	UP	252.074	252.074	252.075	20.4713	20.4122	20.518	23838.4	90173.2	11498.6	179061	10438.5	[77][M+1]-		270		M252T20	n
32		2.42519	-1.2781	-10.8052	0.000629079	0.0379312	DOWN	117.02	117.019	117.02	17.7745	17.72	17.8692	220839	3.34696e+06	253020	1.38008e+06	188114		[M-H-CH3]- 133.057	51		M117T18_2	y
33		122.145	6.93245	31.1126	0.000640664	0.0380825	UP	98.9355	98.9344	98.9359	17.5567	17.2602	17.768	5918116	182224	250181	2.22577e+07	1.20321e+06			3		M99T18_1	n
34		12.7077	-3.66763	-11.9356	0.00070124	0.0391378	DOWN	176.04	176.039	176.04	25.7078	25.647	25.7623	20555.2	160844	18172.6	12657.2	11497.6	[42][M+1]-		59		M176T26	n
35		4.43486	2.14889	11.5297	0.000722844	0.0394837	UP	346.014	346.014	346.015	24.4412	24.4177	24.4665	76131.5	286019	123687	1.26845e+06	80517.6		[M-H+NaCOOH]- 279.031 [M+Cl]- 311.04	66		M346T24	y
36		2.59997	1.3785	10.2566	0.000746755	0.0398497	UP	585.064	585.064	585.064	8.87937	8.86073	8.898	94963.3	434630	70367.4	1.13003e+06	94015.4			71		M585T9	y
37		2.5636	1.35817	9.46463	0.00075356	0.0399508	UP	508.939	508.939	508.939	17.3981	17.3932	17.403	64476.8	352008	66419.9	902409	75722.2			106		M509T17	y
38		2.14182	-1.09883	-9.17905	0.000783568	0.0403909	DOWN	398.856	398.855	398.856	9.86511	9.80635	9.92387	65172.5	1.82563e+06	131075	852374	128632			31		M399T10	n
39		2.13796	1.09624	10.8894	0.000810492	0.0407655	UP	388.943	388.943	388.944	23.169	22.8853	23.3337	126962	1.46651e+06	220610	3.13534e+06	147618			33		M389T23	y
40		3.07628	-1.62119	-10.0946	0.00084932	0.0416506	DOWN	237.974	237.974	237.974	18.2353	18.2238	18.3273	43179.8	544859	51049.8	177116	37084.4			305		M238T18	y
41		2.82272	1.49709	15.8433	0.000898018	0.0427907	UP	151.026	151.026	151.027	9.2663	9.22965	9.37728	64651.5	248642	19846.9	701845	45397.3		[M-H-CH2]- 166.048 [M-H-C4H8]- 208.092	4		M151T9	y
42		2829.59	-11.4664	-31.8613	0.000983154	0.0446361	DOWN	126.885	126.885	126.886	34.9143	34.8362	35.0057	13814088	9.58447e+07	5.2084e+06	33607.7	34262.4			26		M127T35	n
43		41.9004	-5.38889	-22.2526	0.00104202	0.0458133	DOWN	297.899	297.899	297.899	18.4092	18.3363	18.5525	50577.8	931752	68481.9	22237.3	17940.5		[M-2H+K]- 260.95	29		M298T18	n
44		3.90277	-1.9645	-8.74141	0.00108608	0.046647	DOWN	289.116	289.115	289.116	28.6892	28.6717	28.8367	32141	339530	38409.2	86997.3	32070.3			320		M289T29	y
45		239.467	-7.90368	-29.9266	0.00109633	0.0468354	DOWN	464.052	464.052	464.053	18.3727	18.3363	18.4092	50113.7	641472	36943.3	2678.76	1436.8		[3M-H]- 155.024	29		M464T18	y
46		17.3762	-4.11904	-11.3689	0.00109978	0.0468984	DOWN	166.975	166.975	166.976	41.0503	40.9948	41.1193	44863.7	863822	107643	49448.3	61694.3		[3M+Cl]- 43.9939	367		M167T41	y
47		5.14284	-2.36257	-15.1882	0.00130599	0.0524125	DOWN	359.046	359.045	359.046	17.4282	17.301	17.5448	511068	1.42166e+07	1.21595e+06	2.76434e+06	476573		[2M-2H+Na]- 169.035	3		M359T17	y
48		378.376	-8.56368	-24.685	0.00163707	0.0600243	DOWN	265.006	265.005	265.006	25.7078	25.6322	25.748	30469.4	300315	21071.9	0	0		[M-2H+Na]- 244.032	59		M265T26	y
49		1.85136	-0.888586	-8.39016	0.0016371	0.060025	DOWN	317.923	317.923	317.923	17.0942	17.0637	17.1247	130181	1.16561e+06	64951.9	629597	89585.5			153		M318T17_2	n
50		1.65828	0.729686	7.57661	0.00189016	0.0650114	UP	350.028	350.028	350.028	8.86477	8.86073	8.86882	64134	535913	51127.6	888693	62369.5	[152][M+1]-		71		M350T9	n
51		6.34785	-2.66627	-7.24811	0.0020055	0.0670849	DOWN	78.9592	78.9591	78.9593	41.0333	41.0173	41.156	30286.5	634413	85495.8	99676.7	94969.1		[M+Cl]- 43.9939	367		M79T41	y
52		138.996	-7.1189	-21.6223	0.00201508	0.0672519	DOWN	486.035	486.034	486.035	18.3945	18.3218	18.5225	44030.7	660851	52425.1	4489.89	4003.39		[3M-2H+Na]- 155.024	29		M486T18	y
53		33.0264	-5.04555	-15.1927	0.00204527	0.0677736	DOWN	274.956	274.955	274.956	36.4632	36.4528	36.4975	29815.6	411483	43543.1	12194.7	13272.9		[M+Cl]- 239.986 [M-H]- 275.963	160		M275T36	n
54		6.11216	-2.61168	-8.77368	0.00205938	0.0680149	DOWN	206.989	206.989	206.989	20.053	19.9492	20.1075	46464.1	583054	81952.6	95392.5	50516.8			116		M207T20	n
55		16.4404	-4.03918	-21.2274	0.00214839	0.0695007	DOWN	147.049	147.049	147.05	17.5181	17.432	17.5712	10421724	1.95779e+08	1.49803e+07	1.19084e+07	824547	[30][M+1]-		3		M147T18	n
56		3.11933	1.64124	8.78415	0.00217825	0.0699857	UP	142.996	142.996	142.997	18.0646	18.0077	18.1215	143239	1.01703e+06	219074	3.17246e+06	364192			37		M143T18	n
57		8.73772	-3.12726	-7.73247	0.00221198	0.0705256	DOWN	237.974	237.974	237.974	18.6037	18.5505	18.6728	45300.1	640108	103084	73258	74134.1			226		M238T19	y
58		3.04747	-1.60761	-7.21683	0.00230142	0.0719179	DOWN	207.999	207.999	208	22.0497	22.0058	22.1833	64840.5	1.30769e+06	163987	429108	132555			165		M208T22	n
59		1.89804	0.924508	14.9707	0.00258542	0.0759938	UP	110.985	110.985	110.986	17.63	17.611	17.7623	349980	2.99499e+06	301244	5.68459e+06	77992.2		[M+Cl]- 76.0177	176		M111T18	y
60		2.05645	-1.04016	-6.71558	0.00270989	0.0776313	DOWN	550.061	550.061	550.062	17.4126	17.3932	17.432	67665.6	864310	85960.7	420292	75665.8			3		M550T17	y
61		8.47706	-3.08356	-17.6953	0.00279061	0.0786497	DOWN	189.06	189.06	189.06	24.4093	24.3887	24.481	339896	3.43269e+06	294209	404938	35651.8	[50][M+1]-		66		M189T24	n
62		7.55006	-2.91649	-18.1154	0.00282559	0.0790808	DOWN	188.057	188.057	188.057	24.4093	24.3887	24.4815	4593122	4.89411e+07	4.04364e+06	6.48222e+06	359606	[50][M]-		66		M188T24	y
63		8.34653	-3.06118	-7.0228	0.00291694	0.0801789	DOWN	175.042	175.042	175.042	17.1364	17.0927	17.1802	38688.8	155398	27100.9	18618.3	20088.6		[M-H]- 176.049	183		M175T17	n
64		14.6564	-3.87346	-16.4379	0.00299472	0.0810833	DOWN	190.061	190.061	190.061	24.4122	24.3887	24.4815	39392.1	366254	35532.5	24989.3	5520.14	[50][M+2]-		66		M190T24	n
65		2.39699	1.26122	7.05521	0.00304034	0.0816013	UP	78.9591	78.959	78.9593	17.6563	17.528	17.8692	189726	1.11993e+06	311959	2.68447e+06	224073		[M+Cl]- 43.9896 [M+Cl]- 43.9896	176		M79T18	y
66		1.5078	0.592443	6.41814	0.00306172	0.0818409	UP	445.054	445.054	445.055	28.5429	28.4978	28.6265	139491	1.16506e+06	116014	1.75667e+06	109687		[M-H]- 446.061	313		M445T29	y
67		2.94905	-1.56025	-6.77173	0.00307608	0.0820008	DOWN	370.913	370.913	370.914	17.6964	17.6387	17.7542	141337	2.0775e+06	215167	704465	277559		[M-H]- 371.92	176		M371T18	n
68		5.1054	-2.35202	-10.0234	0.00316309	0.0829513	DOWN	353.038	353.037	353.038	17.4488	17.2047	17.5888	125351	1.87827e+06	239578	367899	103539		[2M-2H+Na]- 166.029	3		M353T17	y
69		2.02165	-1.01553	-6.33127	0.00318585	0.0831947	DOWN	99.0089	99.0088	99.0091	4.8439	4.73415	4.98993	103674	1.29685e+06	126524	641483	127029		[M-H-CH3]- 115.039	227		M99T5	y
70		2.21582	1.14784	11.8006	0.00318841	0.0832221	UP	224.024	224.023	224.024	24.6128	24.5643	24.6178	34648	160351	9201.67	355309	27095.3		[M+Cl]- 189.053	103		M224T25	y
71		7.9606	-2.99288	-17.296	0.00320367	0.083384	DOWN	188.906	188.906	188.906	18.5038	18.4552	18.5525	128584	2.47547e+06	216297	310966	14121.3			283		M189T19	n
72		2.6064	1.38206	7.63163	0.00325178	0.0838887	UP	357.104	357.104	357.104	16.6874	16.6627	16.7122	30407.3	190970	36406.6	497745	59347.6			143		M357T17	y
73		2.73166	-1.44978	-8.29071	0.00334752	0.0848671	DOWN	126.987	126.987	126.987	5.63163	5.58553	5.73413	23195.1	209391	24397.9	76653.4	13181		[M-H-HCOOH]- 173.989 [M-H-C6H10O4]- 274.053	354		M127T6	n
74		19.5184	4.28676	16.8618	0.00335894	0.0849816	UP	373.069	373.069	373.069	9.31792	9.31648	9.31935	101027	19456.3	2528.1	379755	36923.6		[M+Cl]- 338.102	4		M373T9_2	y
75		29.4105	-4.87826	-13.4582	0.00346484	0.0860209	DOWN	184.986	184.986	184.986	36.4598	36.4255	36.4975	300862	4.34679e+06	524957	147532	128419	[47][M]-	[M-H+HCOOH]- 139.988	160		M185T36	y
76		2.06976	-1.04947	-8.6671	0.00346921	0.086063	DOWN	236.016	236.015	236.016	17.0625	17.0492	17.1103	366112	3.07483e+06	142292	1.4856e+06	283937	[64][M]-	[M-H+HCOOH]- 191.018	153		M236T17_1	y
77		133.996	-7.06605	-16.2546	0.00348119	0.0861779	DOWN	324.931	324.931	324.932	25.7078	25.647	25.7623	34528.1	321566	33911.5	1870.69	3240.12		[M-2H+Na]- 303.956	59		M325T26	n
78		4.66477	-2.22181	-9.59872	0.00353102	0.0866509	DOWN	154.028	154.027	154.028	18.3942	18.342	18.4463	51362	561690	31660.8	120411	73062		[M-H]- 155.024	29		M154T18_2	y
79		21.0216	-4.3938	-11.5533	0.0035508	0.0868363	DOWN	297.071	297.071	297.071	30.0818	30.0652	30.1892	16788.7	82404.3	11222.6	3655.41	3664.81		[M-2H+Na]- 276.096	352		M297T30	y
80		13.1812	3.72041	8.39641	0.00361453	0.0874254	UP	251.989	251.989	251.989	17.4568	17.4488	17.4648	36642.8	40439	46703.9	536522	91055.2		[M-H-C2H4]- 281.028	3		M252T17_2	y
81		628.07	9.29478	16.5047	0.0036509	0.0877557	UP	296.086	296.086	296.086	9.02453	9.00678	9.04227	34695.7	0	0	498496	52313.5		[M-H-C3H2O3]- 383.107	71		M296T9_3	y
82		2.49183	-1.31721	-8.99049	0.00367897	0.088008	DOWN	382.101	382.101	382.102	27.9888	27.936	28.0417	15960.5	128070	6217.56	51396.1	13399.3			327		M382T28	y
83		13.2479	-3.72769	-9.55663	0.00377285	0.0889326	DOWN	195.067	195.066	195.067	48.4565	48.4453	48.4677	233754	650001	100423	48799.9	42285.1		[M-H]- 196.076	104		M195T48	y
84		3.88169	-1.95668	-8.00671	0.00385856	0.0897535	DOWN	280.021	280.02	280.021	17.5568	17.5142	17.6753	100189	1.34994e+06	191503	347771	101618		[M-H]- 281.028	3		M280T18	y
85		2.41401	1.27143	14.2807	0.00404182	0.091438	UP	170.044	170.044	170.044	18.071	17.9482	18.1938	65986.9	842205	142787	2.03309e+06	21779.5			37		M170T18	n
86		427.98	-8.7414	-15.5677	0.00409022	0.0918676	DOWN	160.025	160.025	160.026	17.577	17.5142	17.6855	493418	8.78224e+06	974670	20520.2	17121.2		[M-H]- 161.036	176		M160T18	y
87		11.2409	3.49069	14.9525	0.00412076	0.0921356	UP	103.004	103.004	103.004	11.2241	11.1272	11.2524	736432	1.5592e+06	176292	1.75269e+07	1.84122e+06		[M-H-C4H8]- 160.079	209		M103T11_1	y
88		92.0134	-6.52377	-14.8374	0.00426071	0.0933329	DOWN	318.036	318.036	318.036	49.4323	49.412	49.4527	707201	2.4279e+06	279397	26121.8	23360.1			2		M318T49_2	y
89		2.98195	1.57625	14.0632	0.00437549	0.0942792	UP	517.076	517.075	517.076	9.3064	9.25418	9.35862	206173	1.15981e+06	36861.9	3.4585e+06	280700		[M+Cl+NaCOOH]- 414.119 [M-H+NaCOOH]- 450.096	4		M517T9_2	y
90		4.23273	2.08159	10.5928	0.00438936	0.0943914	UP	267.984	267.984	267.984	17.4271	17.4222	17.432	23453.3	57535.9	28920.9	243534	9408.68		[M+Cl+CF3COOH]- 99.0296 [M-H]- 268.988	3		M268T17_2	n
91		4.90862	-2.29532	-6.48602	0.00448028	0.0951165	DOWN	182.046	182.046	182.046	26.0192	26.0113	26.0607	28658.1	399741	70325.1	81436.6	47744.9		[M-H-H20]- 201.065	224		M182T26	y
92		8.30656	-3.05425	-11.4099	0.00451245	0.0953686	DOWN	103.06	103.06	103.06	17.2943	17.2735	17.3152	424726	4.25731e+06	548326	512524	149987			106		M103T17	n
93		11.3067	-3.49911	-13.4291	0.00452674	0.0954799	DOWN	98.025	98.0248	98.025	18.717	18.5292	18.8392	1640121	2.26911e+07	2.63489e+06	2.00687e+06	417705			107		M98T19_2	y
94		7.15247	-2.83844	-13.8079	0.00504643	0.102339	DOWN	256.044	256.044	256.045	24.4157	24.3773	24.4815	140772	1.46491e+06	157759	204811	9838.11			66		M256T24_2	n
95		13.9787	-3.80516	-13.3013	0.00518972	0.104138	DOWN	146.046	146.046	146.046	23.6225	23.5628	23.6822	224041	1.07399e+06	129207	76830.4	12872.9		[3M-2H]2- 98.0417	45		M146T24	y
96		4.23442	-2.08216	-7.1975	0.00519053	0.104148	DOWN	98.025	98.025	98.025	20.9499	20.934	20.9658	325663	4.63859e+06	751938	1.09545e+06	401979			251		M98T21	y
97		7.05063	-2.81775	-9.10183	0.00521798	0.104489	DOWN	200.018	200.018	200.018	18.3727	18.2868	18.5225	365554	9.55317e+06	1.46131e+06	1.35494e+06	546321		[M-H+HCOOH]- 155.024	29		M200T18	n
98		3.5611	-1.83232	-10.5985	0.0053594	0.106221	DOWN	117.02	117.019	117.02	20.0678	19.9327	20.1665	1.39735e+06	2.0628e+07	2.33939e+06	5.79258e+06	636608	[11][M]-	[M-H]- 118.027	116		M117T20	y
99		5.53565	-2.46875	-5.96111	0.00549594	0.10786	DOWN	168.028	168.028	168.028	17.7745	17.6935	17.8252	699657	1.17814e+07	2.28794e+06	2.12828e+06	1.62242e+06		[M+Cl]- 133.057	51		M168T18	n
100		4.78648	-2.25896	-5.34366	0.00592358	0.11279	DOWN	392.115	392.114	392.115	30.1128	30.0952	30.2352	12805.4	65155.9	12037.8	13347.9	11708.3		[3M-2H]2- 262.08 [M-H]- 393.121	87		M392T30	y
101		76.6118	-6.25949	-12.7984	0.00604756	0.114166	DOWN	316.973	316.972	316.973	24.4267	24.3743	24.4815	23987.6	127501	17029.5	1664.25	116.968	[125][M+1]-		66		M317T24	n
102		7.14935	-2.83781	-12.1831	0.00619966	0.115821	DOWN	210.039	210.038	210.039	24.415	24.3902	24.4962	165484	1.59904e+06	194577	223663	19335.2		[M-H+Cl]2- 386.124	66		M210T24	y
103		13.7337	-3.77965	-12.0948	0.00642825	0.118245	DOWN	303.024	303.024	303.025	18.4092	18.3363	18.5525	37412.1	566930	75016	41280.2	6253.3			29		M303T18	y
104		9.05627	3.17892	11.9348	0.00663549	0.120379	UP	147.066	147.066	147.066	9.33313	9.30258	9.41835	851882	1.57443e+06	145240	1.42584e+07	1.83504e+06	[29][M+2]-		4		M147T9	n
105		7.01118	2.80966	8.20993	0.00678751	0.121907	UP	296.052	296.052	296.052	16.5917	16.5447	16.6386	32172.1	111786	49427.1	783750	132869			143		M296T17_3	y
106		65.0228	-6.02287	-11.6441	0.00726914	0.126554	DOWN	145.015	145.014	145.015	17.577	17.528	17.6987	254465	5.27655e+06	772627	81149.3	17064		[M-2H+Na]- 124.041 [M-H]- 146.022 [M-H-CH3]- 161.036	176		M145T18	y
107		5.85344	-2.54929	-7.41143	0.0073141	0.126973	DOWN	439.979	439.978	439.979	17.0332	16.9898	17.0672	18204.2	68639.4	12256.6	11726.3	5165.4		[M+Cl+NaCOOH]- 337.02	153		M440T17	n
108		12.5833	3.65343	6.84136	0.0074177	0.12793	UP	193.991	193.991	193.991	6.4546	6.44177	6.5368	73417.5	10518.9	13620.6	135691	28613.8			6		M194T6	n
109		5.72939	-2.51838	-10.9122	0.00742131	0.127964	DOWN	259.023	259.022	259.023	25.4757	25.4437	25.5745	135642	1.80209e+06	234251	314535	29605.1			59		M259T25	y
110		8.89044	3.15225	9.54505	0.00747309	0.128437	UP	502.931	502.931	502.931	17.4282	17.4075	17.4488	16582.7	8473.87	2846.37	75336.5	11794.3			3		M503T17	n
111		10.4564	-3.38632	-7.16794	0.00752623	0.12892	DOWN	246.063	246.062	246.063	30.8938	30.853	30.986	11647.1	57198.7	11510.5	5205.63	5034.87			339		M246T31	y
112		10.0251	3.32555	7.13049	0.00776279	0.13103	UP	185.959	185.959	185.959	6.54776	6.48522	6.6103	35003.2	5833.16	5078	58478.3	11736.5			12		M186T7_1	n
113		2.15701	1.10904	6.43803	0.00776852	0.131081	UP	171.007	171.006	171.007	23.112	22.896	23.2708	4.43272e+06	4.79377e+07	1.3287e+07	1.03402e+08	6.79106e+06	[35][M]-	[M-H]- 172.013	33		M171T23_1	y
114		3.72223	1.89617	7.67769	0.00783983	0.131704	UP	282.04	282.04	282.04	8.86073	8.85648	8.92697	123698	515234	111856	1.91782e+06	295986			71		M282T9	y
115		1.62921	0.704176	5.09117	0.00784188	0.131722	UP	323.935	323.935	323.936	26.1501	26.1353	26.2607	21514.3	115757	19238.3	188592	15617.2		[M-2H+Na]- 302.961	245		M324T26	y
116		6.08577	-2.60544	-9.5865	0.00787916	0.132046	DOWN	206.968	206.968	206.968	36.4828	36.4528	36.4975	74309.2	1.09335e+06	35398.4	179392	161292		[M-H+NaCOOH]- 139.988	160		M207T36	n
117		3.87438	1.95397	7.79054	0.0079843	0.132951	UP	309.971	309.971	309.971	16.6433	16.6333	16.6534	94401.5	473176	103116	1.83327e+06	284260			143		M310T17_1	n
118		1.75494	-0.811421	-6.27963	0.00806948	0.133676	DOWN	214.033	214.033	214.033	17.4355	17.4222	17.4488	871757	2.05916e+07	2.16699e+06	1.17335e+07	1.12854e+06		[M-H+HCOOH]- 169.035	3		M214T17_2	n
119		6.34611	-2.66587	-6.92306	0.00831778	0.135748	DOWN	159.011	159.011	159.011	17.707	17.4365	17.8835	240126	2.6732e+06	516656	421235	224715		[M+Cl]- 124.041	176		M159T18	n
120		2.47143	-1.30535	-6.88771	0.00837829	0.136243	DOWN	244.044	244.044	244.045	17.0625	17.0492	17.1103	32370.3	190895	26192.3	77240.8	11437.7		[M-H]- 245.052	153		M244T17_1	y
121		2.20181	-1.13869	-6.60434	0.0084301	0.136665	DOWN	288.121	288.12	288.121	20.1217	19.9493	20.2552	428401	7.14221e+06	432484	3.2438e+06	926419	[101][M]-		238		M288T20	y
122		22.6272	-4.49998	-10.329	0.00885404	0.140321	DOWN	200.057	200.057	200.057	25.9973	25.9672	26.0753	247332	3.35125e+06	535431	148107	42689	[57][M]-	[M-H]- 201.065	224		M200T26	n
123		3.28031	-1.71383	-7.76087	0.00908596	0.142253	DOWN	289.907	289.906	289.907	22.083	21.9465	22.226	21836.5	277686	13416.7	84652.3	40938.2			165		M290T22	n
124		23.3292	-4.54406	-10.2919	0.00927591	0.1438	DOWN	315.97	315.969	315.97	24.4122	24.3887	24.4815	308466	2.09154e+06	336815	89653.6	7750.63	[125][M]-	[M-2H+K]- 279.031	66		M316T24	y
125		13.4195	-3.74626	-9.73471	0.00929179	0.143928	DOWN	266.026	266.026	266.026	17.0477	17.0197	17.0815	22351.9	84624.9	13817.1	6306.12	1808.33		[M-2H+Na]- 245.052	153		M266T17_1	y
126		3.15396	-1.65717	-5.93993	0.00944732	0.145171	DOWN	214.034	214.033	214.034	17.7411	17.6027	17.8978	792783	1.67183e+07	1.53762e+06	5.30074e+06	2.95297e+06		[M+Cl+HCOOH]- 133.057	51		M214T18	n
127		2.8556	-1.51379	-4.99157	0.0094539	0.145223	DOWN	370.914	370.913	370.914	17.2047	17.1635	17.2342	112117	1.34956e+06	179603	472603	245646			240		M371T17	n
128		115.557	-6.85246	-10.1124	0.00962869	0.146595	DOWN	217.084	217.083	217.084	20.1389	19.9067	20.2688	70646	1.03059e+06	174980	8918.46	2085.37			238		M217T20	y
129		3.1516	1.65608	4.53885	0.0106203	0.15394	UP	194.104	194.103	194.104	1.56346	1.54455	1.59227	35231.9	21089.8	11819.4	66466.4	12654.9			202		M194T2	y
130		5.28181	-2.40103	-7.27317	0.0108075	0.155249	DOWN	278.026	278.026	278.027	24.4222	24.3902	24.4815	123282	1.19861e+06	220327	226931	70717.6		[M-H]- 279.031	66		M278T24	y
131		4.4587	-2.15662	-4.5079	0.0110785	0.157102	DOWN	399.014	399.014	399.015	8.7655	8.62892	9.01063	21335.4	265023	58936.7	59439.6	52592.4		[M+Cl+NaCOOH]- 296.058	15		M399T9	y
132		1.72397	0.785738	5.09027	0.0111593	0.157645	UP	140.986	140.986	140.986	1.43234	1.21398	1.47636	38161	368479	47987.1	635248	77051.4			9		M141T1	n
133		1.37041	0.454607	4.6383	0.0112435	0.158207	UP	156.03	156.03	156.031	26.1817	26.1425	26.2848	352956	3.00165e+06	254382	4.11349e+06	328132	[31][M]-	[M-H-H20]- 175.049	245		M156T26	y
134		2.60595	-1.38181	-6.63918	0.0113032	0.158602	DOWN	247.094	247.094	247.094	20.8318	20.733	21.0362	216724	4.5275e+06	255866	1.73737e+06	681447	[70][M]-		285		M247T21	y
135		2.7965	-1.48362	-6.8108	0.0115731	0.160364	DOWN	172.986	172.986	172.986	5.73798	5.59955	5.9246	178591	1.60069e+06	246934	572391	86075.5			61		M173T6	n
136		3.05731	-1.61226	-5.39949	0.0115739	0.160369	DOWN	188.906	188.905	188.906	17.2073	17.1503	17.4365	412781	3.17558e+06	602342	1.03868e+06	327198			240		M189T17	n
137		11.7446	-3.55392	-9.16584	0.0116063	0.160578	DOWN	133.034	133.033	133.034	18.3508	18.2982	18.5667	491449	8.25765e+06	1.42671e+06	703103	49388.9	[24][M+1]-		29		M133T18	n
138		13.5187	3.75688	9.16085	0.0116112	0.160609	UP	101.072	101.072	101.072	9.33313	8.99228	9.37728	343367	437112	37294.9	5.90918e+06	1.03394e+06		[M-H-CO2]- 146.07	4		M101T9_2	y
139		4.73297	2.24275	5.54418	0.0118734	0.162273	UP	281.037	281.037	281.037	8.73378	8.52087	8.91865	1.88818e+06	8.01222e+06	4.23763e+06	3.79216e+07	8.32779e+06		[M-H+NaCOOH]- 214.057 [M-H-CH2]- 296.058	15		M281T9_2	y
140		18.4047	-4.202	-8.93132	0.0121031	0.163698	DOWN	146.046	146.046	146.046	20.3287	20.2257	20.4318	1.39903e+06	4.92483e+06	901978	267586	46563.2			115		M146T20	y
141		9.5951	-3.2623	-8.35629	0.0121633	0.164067	DOWN	166.997	166.996	166.997	24.8045	24.7863	24.8068	119730	2.30448e+06	422824	240172	65576.4		[M+Cl]- 132.025 [M-2H+Na]- 146.018 [M-H]- 168.002 [M-H-HCOOH]- 214.005	103		M167T25	n
142		2.94416	1.55785	7.74902	0.0122042	0.164316	UP	203.067	203.067	203.067	25.1191	25.117	25.1212	31193.3	100706	9695.08	296494	42674.9			383		M203T25	y
143		1.64686	0.719722	6.02964	0.0122708	0.16472	UP	171.041	171.041	171.042	24.906	24.8578	24.9638	44655.1	321003	23349	528649	54887.6		[M-H-H20]- 190.06	347		M171T25	y
144		8.20353	-3.03624	-6.92183	0.012424	0.165641	DOWN	159.011	159.011	159.011	17.1488	17.1215	17.1667	481936	3.08601e+06	647172	376181	202396		[M-H-CH4]- 176.049 [M-H-C2H4]- 188.05	183		M159T17	n
145		4.58736	2.19766	4.51257	0.0124912	0.16604	UP	312.082	312.081	312.082	9.42334	9.31648	9.5302	30421.8	36192.6	30255.1	166029	39599.5			4		M312T9	y
146		8.32921	-3.05818	-6.96971	0.012593	0.166641	DOWN	185.007	185.007	185.007	20.0383	19.9345	20.1223	39901.2	307524	64364.1	36921.1	19481.4		[M-H+NaCOOH]- 118.027	116		M185T20_2	n
147		2.25164	-1.17098	-7.42458	0.0126725	0.167107	DOWN	105.019	105.019	105.02	6.82879	6.76783	6.9766	512933	7.57851e+06	953662	3.36577e+06	237431		[M+Cl]- 70.0508 [M-H]- 106.027	14		M105T7_2	y
148		3.01769	-1.59345	-4.41219	0.0128411	0.168084	DOWN	237.019	237.019	237.019	17.0625	17.0492	17.1103	26563	152110	24970.8	50406	31152.1	[64][M+1]-		153		M237T17	n
149		6.12203	-2.61401	-5.90842	0.0130957	0.169532	DOWN	340.91	340.909	340.91	5.7844	5.72497	5.90917	27626.9	172984	39101.9	28255.9	16464.6		[M-H-CH4]- 357.935	61		M341T6	y
150		49.902	5.64103	8.64087	0.013104	0.169579	UP	753.119	753.119	753.12	8.89386	8.88972	8.898	38250	4132.2	730.894	206205	40498.6			71		M753T9	y
151		4.54346	-2.18379	-6.73854	0.0131505	0.16984	DOWN	267.985	267.984	267.985	17.1207	17.0637	17.1387	42519.3	171094	32719	37657.1	10287.2		[M-H-COCH2]- 311.005	183		M268T17_1	y
152		2.61932	-1.38919	-5.44352	0.0132678	0.170493	DOWN	725.15	725.149	725.15	17.3982	17.3888	17.4075	31226	195936	34637	74804.3	16905.7			106		M725T17	y
153		12.4408	3.63701	8.20879	0.013343	0.170908	UP	295.96	295.96	295.96	9.04227	9.03563	9.15822	166675	273990	78772.5	3.40866e+06	656706	[105][M+1]-		71		M296T9_2	n
154		14.1124	-3.81889	-7.94678	0.0134769	0.171642	DOWN	294.909	294.909	294.909	24.8328	24.7192	24.8747	66830.1	1.08723e+06	217570	77040.8	33784.2			103		M295T25	n
155		14.877	3.89501	7.78184	0.0138469	0.173625	UP	272.974	272.974	272.975	9.30258	9.29138	9.48767	170252	153123	76614.9	2.27801e+06	466702		[M-H]- 273.982	4		M273T9	y
156		111.308	-6.79842	-8.31685	0.0140929	0.17491	DOWN	259.943	259.943	259.943	18.3363	18.187	18.5378	40812.2	340131	70174.4	3055.76	1845.23		[M+Cl]- 224.979 [M-H]- 260.95	29		M260T18	n
157		1.32956	0.41095	4.34898	0.0141227	0.175064	UP	174.041	174.041	174.041	26.1631	26.1425	26.255	80866.6	686697	71699.4	913005	54615		[M-H]- 175.049	245		M174T26	y
158		1.40357	0.489103	4.57042	0.0143278	0.176113	UP	160.916	160.915	160.916	6.9391	6.8879	7.06082	466358	5.0111e+06	640095	7.03344e+06	421490			147		M161T7_1	n
159		19.6448	-4.29608	-8.20523	0.014485	0.176905	DOWN	146.046	146.046	146.046	18.9366	18.8392	19.034	590954	8.37263e+06	1.67698e+06	426200	38536.7			222		M146T19	y
160		9.52017	-3.25099	-7.95355	0.0149313	0.1791	DOWN	337.064	337.063	337.064	17.3852	17.301	17.5743	1.66379e+06	4.163e+07	8.08994e+06	4.37282e+06	618279	[141][M]-		106		M337T17	y
161		46.8371	5.54958	8.08368	0.014954	0.17921	UP	314.117	314.116	314.117	9.35508	9.26383	9.39033	1.34159e+06	424132	36120.8	1.98651e+07	4.16536e+06	[122][M+1]-		4		M314T9	n
162		4.63717	-2.21324	-5.20373	0.0150217	0.179535	DOWN	275.018	275.017	275.018	35.0593	35.0272	35.1332	10327.6	82674.5	9487.99	17564.1	19484.6			267		M275T35	y
163		3.3433	1.74127	5.70288	0.0155475	0.182004	UP	514.988	514.988	514.989	17.4365	17.1247	17.4488	35471.2	136666	35577.9	456916	90524		[M-H]- 515.996	3		M515T17	n
164		23.2989	4.54219	7.15398	0.0155794	0.182151	UP	445.835	445.835	445.835	17.4499	17.4365	17.4633	31251.8	14909.2	15284.1	347368	79027.2			3		M446T17	n
165		4.48302	-2.16447	-4.2088	0.0156425	0.182439	DOWN	317.923	317.922	317.923	17.9203	17.8483	17.9573	128576	2.15275e+06	546932	480200	417886		[M+Cl]- 282.954 [M-H]- 318.93	37		M318T18	n
166		22.3799	-4.48413	-7.2519	0.0159089	0.183643	DOWN	309.023	309.023	309.024	5.63434	5.5686	5.70008	9998.52	75951.9	17154.2	3129.19	2872.53		[M+Cl]- 274.053	354		M309T6	y
167		15.3738	-3.9424	-6.50103	0.0159638	0.183888	DOWN	174.984	174.984	174.984	5.84765	5.72497	5.94003	13019.1	76463.2	18376.2	4973.62	5009.42			41		M175T6_1	y
168		2.56913	1.36128	5.74123	0.0161235	0.184595	UP	128.035	128.035	128.036	6.85577	6.81058	7.02102	2.03304e+06	2.28492e+07	3.79423e+06	5.87027e+07	1.01292e+07		[M-H]- 129.044 [M-H-H20]- 147.054	14		M128T7_3	y
169		101.37	-6.66348	-7.72967	0.0161298	0.184623	DOWN	253.969	253.969	253.969	18.3795	18.3363	18.5812	38867	633627	140430	6250.66	6522.03			29		M254T18	y
170		5.20893	-2.38099	-5.95284	0.0161573	0.184744	DOWN	117.039	117.039	117.039	6.59247	6.52772	6.63993	290360	2.95307e+06	656677	566924	225379	[8][M+1]-		12		M117T7_3	n
171		2.12608	-1.0882	-4.70659	0.0162024	0.184942	DOWN	344.946	344.946	344.947	8.85537	8.76023	8.93272	51994.3	943546	160202	443796	90324.9		[M+Cl]- 309.978	71		M345T9	y
172		45.9866	-5.52314	-7.54364	0.016703	0.18709	DOWN	336.927	336.927	336.927	36.4455	36.4435	36.4475	8013.88	57716.9	12995.7	990.517	867.414			411		M337T36	y
173		11.3208	-3.5009	-5.77639	0.0169436	0.188094	DOWN	280.99	280.989	280.99	31.9152	31.8807	31.9497	31660.1	625456	161373	54984.1	56734.6			118		M281T32	y
174		7.28815	-2.86555	-6.74673	0.0169809	0.188248	DOWN	201.06	201.06	201.06	26.0338	26.0113	26.0753	19635.9	201649	43700.6	27668.1	9232.19	[57][M+1]-		224		M201T26	n
175		3.2015	-1.67875	-4.89234	0.0170967	0.188724	DOWN	337.064	337.063	337.064	20.8176	20.8172	20.818	25377	372597	81124.7	116382	40580.8		[M+Cl+NaCOOH]- 234.107 [M-H+NaCOOH]- 270.083	285		M337T21	y
176		8.16668	3.02975	7.40443	0.0177286	0.19125	UP	196.023	196.023	196.023	7.3912	7.35712	7.57517	649367	987738	27377.6	8.06654e+06	1.65565e+06	[55][M]-	[M+Cl+NaCOOH]- 93.0659 [M-H+NaCOOH]- 129.043 [M-H+HCOOH]- 151.025 [M+Cl]- 161.053 [M-H]- 197.03	25		M196T7	n
177		3.32824	1.73476	6.96496	0.0184345	0.193939	UP	188.076	188.076	188.076	8.14397	8.1277	8.26242	118342	411384	29454.2	1.36919e+06	236359	[49][M+1]-		97		M188T8	n
178		2.32281	1.21587	4.97636	0.0184468	0.193985	UP	272.086	272.086	272.086	9.54911	9.54803	9.55018	33914.3	128750	24529	299062	53965			266		M272T10	y
179		349.959	8.45104	7.22771	0.0185857	0.194498	UP	482.168	482.168	482.169	9.27815	9.22965	9.37728	209740	7371.34	9871.84	2.67225e+06	638537	[193][M+1]-		4		M482T9_2	n
180		1.44015	0.526216	4.06761	0.0185989	0.194546	UP	418.015	418.015	418.015	8.84347	8.81812	8.86882	41542.4	240600	26234.2	346500	36677			71		M418T9	y
181		178.32	7.47833	7.2292	0.0186023	0.194559	UP	146.022	146.022	146.022	17.3277	17.2602	17.4807	12926372	540175	24953.9	9.63242e+07	2.2949e+07			27		M146T17_1	n
182		3.08079	1.6233	6.47736	0.0186024	0.194559	UP	191.995	191.995	191.995	6.48375	6.44177	6.55043	1.87082e+06	1.4173e+06	160912	4.36639e+06	771999	[52][M]-	[M+Cl]- 157.026 [M-H]- 193.002	68		M192T6	n
183		2.38963	-1.25679	-4.37635	0.0188038	0.195293	DOWN	371.933	371.933	371.933	17.4633	17.451	17.488	9259798	4.76916e+08	9.45633e+07	1.99577e+08	5.57307e+07	[158][M]-	[M+Cl+NaCOOH]- 268.988	3		M372T17_1	n
184		32.0846	5.00381	7.14384	0.018806	0.195301	UP	539.122	539.122	539.122	9.27815	9.02108	9.30258	117346	18037.5	6472.84	578725	135787		[3M+2Cl]2- 336.103	4		M539T9	n
185		6.74302	-2.75339	-6.17961	0.0189495	0.195818	DOWN	337.951	337.951	337.952	24.4239	24.3887	24.4815	143551	1.23185e+06	285496	182685	70469.3		[M-H]- 338.959	66		M338T24	n
186		51.7667	5.69395	6.90392	0.0189995	0.195997	UP	268.942	268.942	268.943	17.7793	17.7092	17.8493	19131	2749.58	4762.42	169728	41619.8			51		M269T18	y
187		11.3856	3.50913	6.14766	0.0190219	0.196077	UP	146.065	146.059	146.066	8.9375	8.74648	8.99228	3.1451e+06	2.3692e+06	1.68205e+06	2.69746e+07	6.72521e+06			71		M146T9_2	y
188		2.49997	-1.32191	-4.30859	0.0195735	0.198008	DOWN	218.104	218.103	218.104	6.90491	6.77883	6.97748	99591.5	1.41828e+06	294444	567317	174143			14		M218T7	y
189		11.2725	-3.49474	-5.40836	0.0196412	0.19824	DOWN	295.941	295.94	295.941	17.8025	17.707	17.8978	798418	1.44353e+07	3.97123e+06	1.28057e+06	1.40622e+06			51		M296T18	n
190		2.2401	-1.16357	-6.47926	0.0197306	0.198545	DOWN	214.034	214.033	214.034	17.1488	17.1073	17.1667	871757	1.28177e+07	1.86804e+06	5.72194e+06	329424		[M+Cl+HCOOH]- 133.059 [M-H+HCOOH]- 169.036	183		M214T17_1	n
191		8.27632	-3.04899	-6.84661	0.0197604	0.198646	DOWN	102.056	102.056	102.056	17.4907	17.432	17.6278	14681080	1.97662e+08	4.37727e+07	2.38829e+07	4.08199e+06	[3][M]-		3		M102T17	y
192		3.22262	1.68823	5.65204	0.0200913	0.199756	UP	789.03	789.03	789.03	8.82163	8.80362	8.83965	24822.7	32069.4	6377.06	103347	20891.3		[M+Cl+NaCOOH]- 686.072 [M-H+NaCOOH]- 722.049	175		M789T9	n
193		4.02089	2.00752	5.20334	0.0200929	0.199761	UP	274.104	274.104	274.104	23.1922	23.1832	23.2012	31578	72266.4	25841.5	290575	67919.1			33		M274T23_2	y
194		2.14195	1.09893	3.9015	0.0202422	0.200254	UP	269.987	269.987	269.987	23.023	22.9687	23.1785	39932.8	359635	145953	770320	109265	[89][M+1]-		105		M270T23	n
195		1.42024	0.506138	4.98014	0.0203206	0.200511	UP	189	189	189	5.82268	5.70013	6.0145	28477.8	170157	9572.28	241664	22953.6	[48][M+2]-		41		M189T6	n
196		88.4802	-6.46728	-6.8568	0.020389	0.200734	DOWN	302.949	302.949	302.949	25.735	25.6618	25.8067	26673.3	188314	47048.6	1863.76	2158.34		[M-H]- 303.956	59		M303T26	y
197		6.35285	-2.6674	-6.15056	0.0203942	0.200751	DOWN	98.025	98.025	98.0251	19.8101	19.758	19.8622	645501	9.61172e+06	2.22894e+06	1.51298e+06	483014			215		M98T20_3	y
198		4.31939	-2.11083	-5.36253	0.0206131	0.201458	DOWN	154.012	154.012	154.013	18.3957	18.301	18.5982	51362	939735	220639	217562	75675.9		[M-H]- 155.024	29		M154T18_1	n
199		18.6072	-4.21779	-6.78073	0.0206354	0.201529	DOWN	148.05	148.05	148.05	17.5008	17.2988	17.5888	1.50624e+06	2.50197e+07	6.0355e+06	1.34463e+06	380843	[30][M+2]-		3		M148T18	n
200		22.9633	4.52126	6.80002	0.0206465	0.201565	UP	268.997	268.997	268.997	9.09039	9.07113	9.10965	81637.7	63080.5	18668.3	1.44853e+06	352399			71		M269T9	y
201		1.39737	0.482715	6.06305	0.0206575	0.2016	UP	189.077	189.077	189.077	23.2446	23.225	23.3023	33548.6	68637.5	1712.66	95912.1	7601.06		[M-H]- 190.086	105		M189T23_3	y
202		26.7971	4.74401	6.69108	0.0210883	0.203128	UP	178.973	178.973	178.973	17.655	17.6358	17.8055	56688.5	30423.6	14064.9	815265	202676		[M+Cl+NaCOOH]- 76.0177	176		M179T18	n
203		8.1501	-3.02682	-4.94386	0.0216828	0.205173	DOWN	453.899	453.898	453.899	17.0189	17.0047	17.0332	19826.5	68694.3	19612.2	8428.64	7819.81			153		M454T17	n
204		29.7295	4.89383	6.58721	0.0217357	0.205352	UP	382.104	382.104	382.104	9.06053	9.03563	9.08543	144978	59739.6	31438.5	1.77603e+06	450188		[M-H]- 383.107	71		M382T9_2	y
205		37.1297	5.2145	6.65091	0.0218197	0.205634	UP	313.113	313.113	313.114	9.33313	9.03563	9.37728	13065237	4.88448e+06	954884	1.81359e+08	4.59482e+07	[122][M]-	[2M-2H+Na]- 146.07	4		M313T9_2	y
206		151.045	-7.23883	-6.6455	0.0218515	0.20574	DOWN	436.946	436.945	436.946	18.403	18.2163	18.5525	72280	1.06274e+06	275091	7035.94	5873.29		[M-H]- 437.953	29		M437T18	y
207		3.49259	-1.8043	-3.67879	0.021854	0.205749	DOWN	236.016	236.015	236.016	17.935	17.891	17.9722	345297	5.17911e+06	1.14805e+06	1.48288e+06	1.30786e+06			37		M236T18	y
208		8.39883	3.07019	5.1991	0.0218742	0.205816	UP	145.034	145.033	145.034	6.52288	6.48522	6.6103	48515	11422.1	9250.11	95932.1	26591.1			68		M145T7	y
209		12.9858	-3.69886	-6.58918	0.021968	0.206129	DOWN	146.046	146.046	146.046	22.1908	22.1405	22.2412	169242	1.68319e+06	407834	129618	21027.4			165		M146T22_2	y
210		3.10969	-1.63677	-3.63855	0.0222233	0.20697	DOWN	331.027	331.026	331.027	8.75819	8.64368	8.93272	42282.6	590966	140112	190040	129588		[M+Cl+NaCOOH]- 228.07 [M+Cl]- 296.058	15		M331T9_2	y
211		91.4648	6.51515	6.54696	0.0225432	0.208008	UP	481.165	481.164	481.166	9.34695	9.26383	9.4053	1.46278e+06	203713	15700.9	1.86326e+07	4.87549e+06	[193][M]-	[M+Cl]- 446.195 [M-H]- 482.172	4		M481T9	y
212		2.63395	1.39723	4.77613	0.0225946	0.208173	UP	205.018	205.018	205.018	9.35153	9.31053	9.5018	545423	1.08084e+06	591373	2.84688e+06	245874			4		M205T9_1	y
213		4.34299	-2.11869	-4.32144	0.0228039	0.208839	DOWN	230.029	230.028	230.029	18.4213	18.2017	18.4995	30819.4	481904	132002	110961	68410			29		M230T18	n
214		13.5904	-3.76451	-5.4517	0.0230581	0.209637	DOWN	115.004	115.004	115.004	18.4552	18.2728	18.5667	230828	2.56197e+06	726045	188514	203652		[M-H]- 116.008	283		M115T18_2	y
215		2.55657	-1.35421	-3.60286	0.0231377	0.209885	DOWN	263.039	263.038	263.039	8.78233	8.742	9.00045	152535	2.45311e+06	534036	959532	479969		[M+Cl]- 228.07	15		M263T9_2	y
216		1.22348	-0.290991	-3.65249	0.0234923	0.210975	DOWN	194.893	194.893	194.893	10.7316	10.5097	10.897	705157	9.45988e+06	638729	7.73194e+06	513275			99		M195T11_2	n
217		15.5761	-3.96127	-6.37557	0.0235089	0.211026	DOWN	234.984	234.984	234.984	24.8068	24.7897	24.83	68879.4	1.20218e+06	305341	77181	13263		[M+Cl+NaCOOH]- 132.025 [M-H+NaCOOH]- 168.002 [M-2H+Na]- 214.005	103		M235T25	y
218		7.04556	-2.81671	-5.58056	0.0239356	0.212308	DOWN	199.023	199.022	199.023	4.88174	4.84713	4.91635	12710	97800.4	25332.2	13881.1	6056.84			408		M199T5	n
219		8.44668	-3.07838	-5.95148	0.0239421	0.212327	DOWN	319.978	319.977	319.978	17.0573	17.0332	17.0815	12044.7	37209.7	9422.21	4405.25	1538.78		[M-H-CH4]- 337.02	153		M320T17	n
220		3.38825	1.76054	6.22434	0.0240269	0.212578	UP	241.922	241.922	241.922	6.53961	6.51363	6.62507	176009	304232	16832.4	1.03081e+06	201485	[68][M+1]-		12		M242T7	n
221		1.34764	-0.430436	-3.52011	0.0245637	0.214141	DOWN	262.88	262.88	262.881	10.4992	10.4888	10.5097	86543.5	1.76476e+06	162593	1.30952e+06	154075			117		M263T10_1	n
222		237.949	7.89451	6.23482	0.0247196	0.214586	UP	427.033	427.033	427.033	17.4499	17.4488	17.451	44661.3	2115.08	3663.43	629187	174164			3		M427T17_2	y
223		2.39069	-1.25743	-4.97871	0.02473	0.214615	DOWN	499.917	499.917	499.918	10.5677	10.5237	10.6117	20819.8	138023	26459.4	57733.5	8949.43			117		M500T11	y
224		30.1928	-4.91613	-6.18248	0.0248334	0.214909	DOWN	274.105	274.104	274.105	21.4165	21.325	21.5348	31205.7	464893	125749	15397.5	6719.64			65		M274T21	y
225		6.47055	2.69389	6.04136	0.0249369	0.2152	UP	126.02	126.02	126.02	6.54873	6.51363	6.62507	715981	428216	71425.5	2.77079e+06	667805	[15][M+2]-		12		M126T7_3	n
226		12.1247	3.59988	6.11211	0.0249881	0.215344	UP	122.985	122.985	122.985	16.6507	16.6481	16.6534	40584.9	58796.6	14543.9	712890	184786			143		M123T17	y
227		13.365	-3.74039	-4.8957	0.0250116	0.21541	DOWN	256.947	256.947	256.948	5.80307	5.72497	5.9246	9664.49	45467.8	14224.4	2872.87	4975.96		[M-H-CH2]- 271.97	41		M257T6	n
228		933	9.86573	6.19892	0.0250499	0.215517	UP	292.134	292.134	292.135	9.29138	9.26012	9.45902	63772.6	0	0	740517	206909	[103][M+1]-		4		M292T9	n
229		4.58208	2.196	5.99576	0.0253627	0.216451	UP	449.088	449.088	449.088	8.9877	8.93313	9.04227	400102	1.61924e+06	174767	7.41951e+06	1.66644e+06		[M+Cl]- 414.123 [M-H]- 450.098	71		M449T9_1	y
230		5.4693	2.45136	5.97242	0.0261593	0.218764	UP	295.96	295.96	295.96	9.35862	9.35153	9.389	144151	395383	39620.5	2.16247e+06	510935	[106][M+1]-		4		M296T9_1	n
231		1.15768	0.211232	3.45006	0.0262103	0.218909	UP	117.075	117.075	117.075	5.82592	5.75625	5.85218	20832	269481	14612.2	311972	15541.3	[9][M+1]-		41		M117T6_2	n
232		6.46555	2.69277	5.73401	0.0262313	0.218969	UP	145.062	145.062	145.062	8.72957	8.58307	8.99228	52875900	8.48656e+07	2.10018e+07	5.48703e+08	1.38527e+08			15		M145T9_3	y
233		20.4677	-4.35527	-6.00781	0.0264516	0.21959	DOWN	331.056	331.055	331.056	17.4483	17.2462	17.5632	238955	4.39512e+06	1.20447e+06	214735	42115.2		[2M-H]- 166.029	3		M331T17_2	y
234		2.55323	1.35232	3.77426	0.0266527	0.220151	UP	779.573	779.573	779.574	6.57328	6.53627	6.6103	36825.7	31317.9	11866.3	79961.6	18908.1		[M-H]- 780.584	12		M780T7	y
235		3.96893	1.98875	4.83578	0.026726	0.220354	UP	244.044	244.044	244.044	17.432	17.3573	17.451	40795.9	137595	46255.3	546107	138814			3		M244T17_2	y
236		5.24432	2.39076	5.95341	0.0268085	0.220582	UP	128.035	128.035	128.035	9.31786	9.30258	9.33313	3.54616e+06	1.29908e+07	733792	6.81281e+07	1.60245e+07		[M-H-NH3]- 146.07	4		M128T9_1	y
237		30.2494	-4.91884	-5.87607	0.0268405	0.22067	DOWN	186.041	186.041	186.041	26.266	26.2465	26.2855	14850.7	166220	47204.2	5494.97	4027.9			402		M186T26	y
238		7.6125	-2.92837	-5.45931	0.0270458	0.221232	DOWN	528.08	528.08	528.081	17.4052	17.3427	17.5158	222495	5.48142e+06	1.48209e+06	720055	292210		[M+Cl]- 493.107 [M-H-C2H4]- 557.12	106		M528T17	y
239		19.3511	-4.27434	-5.8859	0.0270555	0.221258	DOWN	316.022	316.021	316.022	17.3285	17.26	17.62	70968.8	768106	213833	39693.2	14899.4			27		M316T17_1	y
240		3.43983	1.78234	4.75603	0.0270981	0.221374	UP	311.169	311.169	311.17	2.47868	2.43308	2.53	39815.1	69116.5	19966.3	237749	58076.2			144		M311T2	y
241		2.71551	-1.44122	-4.60066	0.0274876	0.222422	DOWN	360.049	360.048	360.049	17.4052	17.403	17.4075	53240	616333	137428	226968	51004.1		[M-H-C5H8O4]- 493.107	106		M360T17	y
242		3.28994	-1.71806	-3.71234	0.0276103	0.222748	DOWN	135.03	135.03	135.03	6.86378	6.77883	7.02102	239770	2.59083e+06	710384	787499	450844		[3M-2H+Na]- 38.022 [M-2H+K]- 98.0782	14		M135T7_5	y
243		3.9919	-1.99707	-5.42056	0.0282459	0.224405	DOWN	231.099	231.099	231.099	19.0172	18.9112	19.1232	23784.9	287917	67876	72125.4	12137.1			226		M231T19	y
244		20.4055	-4.35088	-5.23674	0.0283755	0.224737	DOWN	324.935	324.935	324.936	5.84765	5.72497	5.90917	15703.9	80011.5	24668.6	3656.52	5407.68		[M-H]- 325.938	41		M325T6	n
245		1.23316	0.30236	3.43822	0.0291531	0.226686	UP	270.812	270.812	270.813	1.28758	1.24051	1.37855	434444	5.09791e+06	364794	6.28654e+06	474840			9		M271T1_1	n
246		8.4879	3.08541	5.21445	0.0291633	0.226711	UP	266.026	266.026	266.026	17.4723	17.4075	17.4918	24053.5	59372.3	30118.7	503946	144567		[3M-H+Cl]2- 166.029	3		M266T17_2	y
247		1.60567	-0.683173	-3.93887	0.0291641	0.226713	DOWN	168.028	168.028	168.028	17.1488	17.1215	17.1667	790099	9.91132e+06	1.46004e+06	6.17271e+06	755631		[M+Cl]- 133.059 [M-H]- 169.036	183		M168T17_2	n
248		1.78452	0.835536	4.76288	0.0292392	0.226897	UP	158.051	158.051	158.051	6.70278	6.57188	7.03112	88713.2	720715	196533	1.28613e+06	60440.6		[M+Cl]- 123.081	43		M158T7	n
249		7.89871	-2.98162	-5.68956	0.0292826	0.227003	DOWN	165.02	165.019	165.02	17.5142	17.2047	17.62	331688	7.11046e+06	1.88881e+06	900205	81449.2		[M-H]- 166.029	3		M165T18	y
250		7.70904	-2.94655	-4.09833	0.0295218	0.227585	DOWN	254.893	254.893	254.893	5.83978	5.7392	5.95527	22026.5	182814	61002.6	23714.2	28281		[M-H-CH2]- 269.917	41		M255T6	n
251		5.32452	-2.41265	-5.57788	0.0296807	0.227968	DOWN	250.031	250.031	250.032	19.9928	19.8745	20.2552	25807.5	395027	99261.1	74190.2	8526.48		[M+Cl+NaCOOH]- 147.075 [M-H+NaCOOH]- 183.051	356		M250T20	y
252		12.0361	3.58929	5.61298	0.0296912	0.227993	UP	196.023	196.023	196.023	8.67664	8.64395	8.70933	65968.7	95794.6	22012.9	1.15299e+06	325485		[M-H-NH3]- 214.057	15		M196T9_1	n
253		1.29982	0.378308	3.35684	0.0300032	0.228736	UP	172.098	172.098	172.098	13.0713	13.0518	13.2574	1.1867e+06	1.46273e+07	1.74707e+06	1.90127e+07	1.43808e+06			135		M172T13_2	y
254		5.66529	2.50215	4.84535	0.0303865	0.229635	UP	243.918	243.918	243.918	6.51757	6.48522	6.54993	32970.7	11732.9	5104.12	66470.6	18889.4			68		M244T7	y
255		15.0296	3.90974	5.5767	0.0304333	0.229743	UP	199.073	199.072	199.073	9.12642	9.092	9.33292	342156	292403	54463.7	4.3947e+06	1.27296e+06			247		M199T9	y
256		2.08338	1.05893	4.88089	0.0304753	0.229841	UP	309.088	309.088	309.088	29.4627	29.412	29.6033	19542.2	69327.3	6721.62	144435	25791.6			63		M309T29	y
257		2.2797	1.18884	3.27927	0.0305833	0.23009	UP	211.883	211.883	211.883	17.8493	17.7385	17.993	107524	987230	463026	2.25059e+06	480494		[3M+2Cl]2- 117.942 [M+Cl]- 176.913	37		M212T18	n
258		2.10703	1.07521	3.69108	0.0306049	0.23014	UP	270.987	270.987	270.987	22.9672	22.8968	23.0375	27146.8	168722	44151	355504	75715.5	[89][M+2]-		105		M271T23_2	n
259		6.40892	2.68008	4.84286	0.0306149	0.230163	UP	192.998	192.998	192.999	6.50322	6.4546	6.55183	50463.3	11407.6	5690.85	73110.3	21321.6	[52][M+1]-		68		M193T7	n
260		1.3435	-0.425997	-5.30698	0.0306796	0.230311	DOWN	147.03	147.03	147.03	24.6677	24.6238	24.7268	188676	1.94385e+06	160423	1.44685e+06	23981.6	[27][M+2]-		103		M147T25	n
261		3.52889	-1.81921	-4.89892	0.0307594	0.230494	DOWN	113.571	113.57	113.572	1.83407	1.76258	2.18412	60638.2	226414	55633.3	64160.2	13993.3			353		M114T2_1	n
262		3.36192	-1.74929	-3.3735	0.0307975	0.230581	DOWN	154.996	154.996	154.997	5.04227	4.94573	5.36077	30916.8	422520	120740	125678	93005			80		M155T5	n
263		3.12039	1.64172	3.95999	0.0309744	0.231023	UP	242.065	242.064	242.065	17.904	17.7385	17.9915	163422	1.50886e+06	607207	4.70823e+06	1.26076e+06		[M+Cl]- 207.095	37		M242T18	y
264		6.12559	-2.61485	-5.4519	0.0312637	0.231889	DOWN	99.0283	99.0281	99.0284	17.8168	17.7625	17.8978	284900	5.42974e+06	1.43939e+06	886403	107600	[2][M+1]-		51		M99T18_2	n
265		2.53909	-1.34431	-5.4428	0.0319781	0.233988	DOWN	356.898	356.897	356.898	17.5873	17.5687	17.6058	227642	2.53721e+06	489141	999260	16520.1		[M-H-CH2]- 371.92	176		M357T18	n
266		10.8188	-3.43547	-5.25571	0.0320025	0.234058	DOWN	308.016	308.016	308.016	24.4393	24.3743	24.4675	42236.3	390392	115795	36084.5	15012.7			66		M308T24	y
267		75.5473	-6.23931	-5.44216	0.0320642	0.234237	DOWN	282.928	282.928	282.929	18.3812	18.1793	18.5812	40229.9	648948	203745	8589.96	4891.45	[96][M+1]-		29		M283T18	n
268		2.01155	1.00831	3.97644	0.0321018	0.234346	UP	588.898	588.898	588.9	7.86757	7.73448	8.02732	1.25336e+06	8.57286e+06	1.57699e+06	1.72448e+07	3.43235e+06			128		M589T8	n
269		1.15428	-0.206995	-3.23076	0.0326849	0.236009	DOWN	114.937	114.937	114.937	9.96409	9.86607	10.1313	307978	4.02914e+06	190858	3.49061e+06	216634		[M+2Cl]2- 159.929 [M-H-CO2]- 159.929	31		M115T10	n
270		187.383	-7.54985	-5.37623	0.0328799	0.236557	DOWN	399.104	399.103	399.104	24.4412	24.4033	24.4962	45475.3	267034	85649.9	1160.5	1006.92			66		M399T24	y
271		1.42443	0.510382	4.86227	0.032928	0.236692	UP	117.019	117.019	117.02	6.78921	6.75242	7.02102	499757	6.10757e+06	199784	8.6998e+06	901538			19		M117T7_2	y
272		1.13611	0.184098	4.34648	0.0329601	0.236781	UP	119.035	119.035	119.035	6.82423	6.73832	7.04493	330931	4.95189e+06	253696	5.62587e+06	88164.3		[M-H-CH3]- 135.059	110		M119T7	y
273		2.64758	-1.40467	-5.01006	0.0332624	0.237621	DOWN	89.0246	89.0244	89.0247	5.76812	5.6299	5.95527	5267005	4.69324e+07	9.94564e+06	1.77265e+07	1.74117e+06	[1][M]-	[M+Cl]- 54.0538	61		M89T6	y
274		8.80549	-3.1384	-4.74196	0.0340184	0.23968	DOWN	231.024	231.023	231.024	17.0918	17.0783	17.1527	23138.2	108462	34201.8	12317.5	7967.79			153		M231T17_1	y
275		13.6827	-3.77428	-5.27582	0.0340486	0.239761	DOWN	146.046	146.046	146.046	17.488	17.3022	17.5857	189715472	3.09371e+09	9.41268e+08	2.26103e+08	1.76857e+07	[30][M]-		3		M146T17_2	y
276		125.397	-6.97036	-5.26914	0.034181	0.240116	DOWN	323.048	323.048	323.049	18.4739	18.4552	18.4927	69588.2	713315	232607	5688.45	606.112			283		M323T18_2	y
277		10.2162	-3.35279	-5.11982	0.0341905	0.240141	DOWN	329.998	329.998	329.998	24.4122	24.3887	24.5108	25688.1	196394	59546.7	19223.8	6830.14			66		M330T24_1	y
278		1.76465	-0.819383	-3.27072	0.034257	0.240319	DOWN	877.631	877.63	877.633	5.57002	5.47295	5.62567	15909.4	127952	23450.5	72508.3	17667.3		[M+Cl]- 842.669	21		M878T6	n
279		1.49295	0.578168	4.76556	0.0344284	0.240774	UP	187.002	187.001	187.002	5.83108	5.42598	6.24398	528048	2.90768e+06	111699	4.34102e+06	508836	[48][M]-		41		M187T6	n
280		2.20201	-1.13882	-3.50792	0.0349972	0.242264	DOWN	160.062	160.062	160.062	20.0492	20.021	20.1813	515665	1.15368e+07	1.57004e+06	5.23923e+06	2.68397e+06			116		M160T20	y
281		13.0589	-3.70697	-5.07063	0.0354353	0.243391	DOWN	281.925	281.924	281.925	18.3443	18.1938	18.5982	1.10096e+06	1.83188e+07	5.75253e+06	1.40278e+06	544732	[96][M]-	[M-2H+Na]- 260.95	29		M282T18	n
282		7.62488	2.93072	4.72308	0.0355211	0.24361	UP	152.986	152.986	152.986	26.324	26.3197	26.3283	9672.01	7801.5	3917.93	59485.5	18544.2			214		M153T26	n
283		1.98519	0.989281	3.24134	0.0355342	0.243643	UP	228.081	228.081	228.081	5.80598	5.75625	5.8557	37239.1	255000	80011.2	506224	107796		[2M-2H+Na]- 103.544 [M-H]- 229.084	41		M228T6	y
284		12.512	3.64524	5.09138	0.035572	0.243739	UP	391.035	391.035	391.036	8.1277	8.11468	8.12935	126348	101355	30938.3	1.26816e+06	395730		[M+Cl+NaCOOH]- 288.078 [M-H+NaCOOH]- 324.055 [M+Cl]- 356.066 [M-H]- 392.042	86		M391T8	y
285		3.34199	1.74071	4.37996	0.0355986	0.243807	UP	276.799	276.799	276.799	17.9471	17.8893	18.0048	8575335	9.67335e+07	2.57804e+07	3.23283e+08	8.57993e+07			37		M277T18	n
286		3.71759	1.89437	4.51392	0.0358555	0.244456	UP	74.0248	74.0247	74.0249	6.56403	6.54218	6.63993	221627	560766	148093	2.0847e+06	565690		[M-H-COCH2]- 117.043	12		M74T7	y
287		167.296	7.38626	5.12746	0.0359933	0.244802	UP	291.131	291.131	291.132	9.29138	9.27443	9.45902	772443	44560.2	8212.35	7.45473e+06	2.50314e+06	[103][M]-	[2M-H]- 146.07	4		M291T9	n
288		49.1918	-5.62034	-5.10829	0.0362392	0.245415	DOWN	273.958	273.958	273.959	17.4343	17.403	17.577	330933	6.28916e+06	2.08901e+06	127850	18535.3		[M-H]- 274.966	3		M274T17	n
289		6.46212	-2.69201	-4.14742	0.0366237	0.246363	DOWN	226.83	226.83	226.831	17.2607	17.1503	17.4222	91574.5	983082	327809	152130	113869			201		M227T17	n
290		840.083	9.71439	5.0763	0.0366833	0.246509	UP	649.218	649.217	649.218	9.26913	9.26383	9.27443	379742	5561.97	4403.91	4.67251e+06	1.59237e+06			4		M649T9	n
291		15.1391	-3.92021	-5.05076	0.0369327	0.247116	DOWN	315.082	315.081	315.082	17.4378	17.1778	17.6713	6.48923e+06	1.04278e+08	3.33866e+07	6.88799e+06	870895	[124][M]-	[M-H-C2H4]- 344.12	3		M315T17	y
292		3.627	-1.85878	-4.67147	0.0371903	0.247737	DOWN	115.004	115.004	115.004	48.7453	48.4827	48.8233	116559	4.73064e+06	243509	1.30402e+06	1.24694e+06			237		M115T49	y
293		1.48676	0.572173	3.31478	0.0373308	0.248073	UP	218.874	218.874	218.875	6.9391	6.8879	7.10713	853957	7.15965e+06	986669	1.06447e+07	1.53055e+06			147		M219T7_1	n
294		1.64442	0.717577	4.78398	0.0375499	0.248595	UP	229.068	229.068	229.068	16.6581	16.6534	16.6627	106773	1.37848e+06	48133.6	2.26679e+06	317994			143		M229T17	n
295		6.25149	-2.6442	-4.8467	0.0379226	0.249474	DOWN	329.097	329.097	329.098	18.3257	18.1793	18.5812	115345	1.91673e+06	571483	306603	67070.7			29		M329T18	y
296		37.934	5.24542	4.97321	0.0379616	0.249565	UP	256.063	256.063	256.063	8.10698	8.06998	8.14397	45005.2	10822.4	4657.78	410536	139133	[80][M+1]-		86		M256T8	n
297		3.66471	-1.8737	-3.74629	0.0381909	0.250099	DOWN	424.871	424.87	424.872	5.77138	5.6299	5.9246	18666.8	116260	35704.9	31724.2	15897.4			61		M425T6	n
298		108.938	6.76736	4.94482	0.0385368	0.250897	UP	329.087	329.087	329.087	9.31786	9.30258	9.33313	68756.8	8400.36	2738.83	915115	317588		[2M-2H+K]- 146.07	4		M329T9	y
299		2.71624	1.44161	3.67942	0.03903	0.252019	UP	253.086	253.086	253.087	9.79593	9.72468	9.90113	254251	1.35876e+06	455902	3.69073e+06	998603		[M+Cl]- 218.117 [M-H]- 254.094	278		M253T10	y
300		1.0991	-0.136327	-4.90847	0.0390367	0.252035	DOWN	378.919	378.919	378.92	29.1227	29.0563	29.189	80036.6	2.46123e+06	78296.7	2.23931e+06	1421.9		[M+Cl+NaCOOH]- 275.962 [M-H+NaCOOH]- 311.939	232		M379T29	n
301		3.27282	1.71053	4.28504	0.0390686	0.252107	UP	122.976	122.976	122.976	6.60672	6.55692	6.96403	1329354	4.4828e+06	1.09241e+06	1.46714e+07	3.9708e+06	[13][M+3]-		12		M123T7	n
302		29.0874	4.86232	4.87872	0.0392895	0.252602	UP	527.009	527.009	527.01	8.12893	8.06998	8.12935	81807.9	19119.8	7590.37	556147	190505		[M+Cl+NaCOOH]- 424.053 [M-H+NaCOOH]- 460.03 [M+Cl]- 492.04 [M-H]- 528.017	86		M527T8	y
303		3.04463	-1.60627	-4.64797	0.0393077	0.252643	DOWN	90.0279	90.0278	90.028	5.75366	5.6299	5.95527	165874	1.51108e+06	373369	496311	59952.7	[1][M+1]-		61		M90T6	n
304		2.97495	-1.57286	-3.65489	0.039355	0.252749	DOWN	854.92	854.918	854.922	6.49423	6.45208	6.53637	48593.3	62862.2	8327.71	20866	18075.9			68		M855T6	n
305		9.43889	3.23862	4.52059	0.0397292	0.253579	UP	382.104	382.104	382.106	9.31892	9.28872	9.4053	170815	116543	72126.3	1.10003e+06	369855	[168][M+1]-		4		M382T9_1	n
306		8.64661	-3.11214	-4.17172	0.0398221	0.253783	DOWN	355.852	355.843	355.852	6.94805	6.93172	7.0028	152786	882073	310524	102014	92020.7			147		M356T7_2	n
307		8.92557	-3.15794	-4.81626	0.0400799	0.254348	DOWN	345.03	345.03	345.03	18.1065	18.0988	18.1355	69024.6	967173	308434	108360	16043.3		[M-2H+Na]- 324.056	284		M345T18	y
308		1.08918	-0.123241	-3.41489	0.0403243	0.254878	DOWN	170.044	170.044	170.044	12.7443	12.737	12.7516	81235.5	733794	26793.1	673713	14517.6			137		M170T13	n
309		1.22707	0.295218	4.56542	0.0408188	0.255939	UP	317.058	317.058	317.059	27.7102	27.6573	27.8093	37353.3	342139	4608.6	419829	29111.8			229		M317T28	y
310		3.13262	-1.64737	-3.00598	0.0409101	0.256133	DOWN	304.004	304.003	304.004	17.9498	17.9193	18.0018	85970.6	1.06578e+06	271981	340220	317502		[M+Cl]- 269.033	37		M304T18_2	n
311		3.60979	1.85191	3.96085	0.041265	0.256881	UP	216.124	216.124	216.125	5.18823	5.1822	5.19427	31034.6	61570.8	22512.6	222257	66563.2			80		M216T5	y
312		4.13296	2.04718	4.63318	0.0417453	0.257881	UP	99.0564	99.0564	99.0564	9.29037	9.27815	9.30258	38190.1	169824	21007	701876	197788		[M-H-HCOOH]- 146.07	4		M99T9	y
313		18.2273	4.18803	4.67216	0.0421252	0.258661	UP	459.022	459.022	459.022	8.11398	8.09862	8.12935	90025.7	44227.6	19271.1	806150	281799		[M+Cl+NaCOOH]- 356.066 [M-H+NaCOOH]- 392.042 [M+Cl]- 424.053 [M-H]- 460.03	86		M459T8	y
314		6.09438	2.60748	4.56491	0.0422141	0.258842	UP	617.142	617.141	617.143	9.29052	8.97835	9.4761	55254.7	87706.9	21230	534519	168198		[M+Cl+NaCOOH]- 514.184 [M-H+NaCOOH]- 550.16 [M+Cl]- 582.173 [M-H]- 618.15	4		M617T9	y
315		15.3377	-3.93901	-4.69715	0.0423111	0.259039	DOWN	316.085	316.085	316.085	17.4349	17.1778	17.6713	535482	9.54582e+06	3.28899e+06	622376	98842.9	[124][M+1]-		3		M316T17_2	n
316		6.01319	2.58813	4.51074	0.0425979	0.259618	UP	301.877	301.877	301.878	6.56403	6.49948	6.62507	91587.4	60967.3	16335.1	366608	116219			12		M302T7_1	n
317		7.34903	2.87755	4.6761	0.0427012	0.259826	UP	127.051	127.051	127.051	9.31786	9.30258	9.33313	7939499	1.7722e+07	1.10872e+06	1.30239e+08	4.16622e+07	[16][M]-	[M-H-H20]- 146.07	4		M127T9	y
318		717.914	-9.48767	-4.64583	0.0433411	0.261095	DOWN	323.048	323.048	323.048	18.1133	18.1065	18.1355	121352	1.65375e+06	615688	2303.55	505.265		[M-2H+Na]- 302.073 [M-H]- 324.056	284		M323T18_1	y
319		7.89245	-2.98047	-4.55288	0.0435166	0.261439	DOWN	174.089	174.088	174.089	11.9772	11.9044	12.1067	975363	3.22673e+07	1.06718e+07	4.08838e+06	1.01599e+06		[M+Cl]- 139.119 [M-H]- 175.096	159		M174T12	y
320		1.68142	-0.749677	-2.91602	0.0435537	0.261511	DOWN	243.024	243.024	243.024	25.6637	25.6322	25.7623	30131.9	267179	44300.4	158901	46624.4		[M+Cl+NaCOOH]- 140.067 [M-H+NaCOOH]- 176.044 [M-H]- 244.032	59		M243T26	n
321		7.61658	-2.92914	-4.62761	0.0436185	0.261637	DOWN	88.0406	88.0404	88.0406	18.3508	18.2088	18.5812	961206	1.37409e+07	4.4672e+06	1.80407e+06	71667.7			29		M88T18	y
322		1.19766	-0.260214	-3.61953	0.0436607	0.26172	DOWN	363.943	363.943	363.943	10.5537	10.553	10.5545	68941.9	2.08246e+06	151779	1.73878e+06	63329.3			117		M364T11	y
323		10.6014	3.40618	4.59181	0.0438832	0.262151	UP	323.047	323.047	323.047	8.12857	8.11317	8.14397	217326	171189	31014.5	1.81484e+06	619216		[M+Cl+NaCOOH]- 220.091 [M-H+NaCOOH]- 256.068 [M+Cl]- 288.078 [M-H]- 324.055	86		M323T8	y
324		4.85071	-2.2782	-3.81516	0.0441624	0.262688	DOWN	359.933	359.933	359.934	24.4067	24.3902	24.4815	54013.4	383708	130685	79103.6	45221.3		[M-2H+Na]- 338.959	66		M360T24	y
325		11.9504	3.57899	4.57423	0.0444516	0.263239	UP	148.069	148.069	148.069	9.2969	9.28872	9.30508	45243.8	50681.9	6635.4	605670	210044	[29][M+3]-		4		M148T9	n
326		2.04441	-1.03168	-4.26268	0.0445821	0.263486	DOWN	295.941	295.94	295.941	17.1488	17.1073	17.1802	857988	1.14061e+07	2.3234e+06	5.57919e+06	455656			183		M296T17_1	n
327		1.71103	0.774869	3.96455	0.0446212	0.26356	UP	114.02	114.02	114.02	18.403	18.1938	18.5667	94095.5	1.34995e+06	402433	2.3098e+06	117897			29		M114T18	y
328		1.48636	0.571788	2.93145	0.0446461	0.263607	UP	290.965	290.965	290.966	23.257	23.0082	23.3337	113156	1.1688e+06	259023	1.73726e+06	213823			30		M291T23	y
329		4.01347	2.00485	4.48894	0.0449689	0.264213	UP	144.03	144.03	144.03	6.53627	6.51363	6.62507	1.07728e+06	991564	98954.4	3.97962e+06	1.14868e+06		[M-H-C2H4]- 173.073	12		M144T7_1	y
330		9.76957	3.28829	4.52334	0.0451611	0.264571	UP	146.065	146.065	146.066	9.34703	9.30258	9.45902	7411077	1.13121e+07	1.84627e+06	1.10515e+08	3.79412e+07	[29][M+1]-		4		M146T9_1	n
331		2.37946	-1.25064	-2.9477	0.0452368	0.264712	DOWN	343.978	343.977	343.978	17.2668	17.1635	17.451	782392	1.12287e+07	2.34929e+06	4.71901e+06	3.0186e+06			201		M344T17	n
332		9.79112	3.29147	4.51576	0.0452994	0.264828	UP	109.041	109.041	109.041	9.3534	9.30258	9.45902	640783	785411	129336	7.69005e+06	2.64516e+06			4		M109T9	y
333		8.09824	-3.01761	-4.52561	0.0453219	0.264869	DOWN	132.03	132.03	132.03	18.3508	18.2088	18.5667	11342410	1.73747e+08	5.82517e+07	2.14549e+07	1.98239e+06	[24][M]-		29		M132T18	y
334		1.33038	0.411843	2.87724	0.0454543	0.265113	UP	224.903	224.903	224.903	18.8239	18.7668	18.881	230448	2.26048e+06	305475	3.0073e+06	329855			226		M225T19_2	n
335		4.28001	2.09761	3.75042	0.0454584	0.265121	UP	363.103	363.103	363.103	8.96987	8.88573	9.14402	54460.8	112997	56664.9	483627	161516		[M-H-C3H2O3]- 450.098	71		M363T9	y
336		4.38703	2.13325	4.43103	0.0458341	0.265808	UP	120.98	120.979	120.98	6.58984	6.57188	6.69885	100731	182563	22738.3	800908	240634	[13][M+1]-		12		M121T7	n
337		128.782	7.00879	4.49718	0.0460069	0.266122	UP	159.041	159.041	159.041	9.36036	9.31648	9.40423	52847.8	4909.26	4309.89	666297	254691			4		M159T9	y
338		10.8117	3.43452	4.49363	0.0460415	0.266185	UP	145.062	145.062	145.062	9.34703	9.30258	9.45902	135053856	1.81311e+08	1.50485e+07	1.96028e+09	6.8553e+08	[29][M]-	[M-H]- 146.07	4		M145T9_2	y
339		578.922	-9.17723	-4.48464	0.0462936	0.266639	DOWN	301.066	301.066	301.066	18.1355	18.0988	18.1782	224329	3.22593e+06	1.24375e+06	5572.3	4539.8		[M-H]- 302.073	284		M301T18	y
340		1.98971	-0.992559	-3.9852	0.0463395	0.266722	DOWN	195.051	195.051	195.052	11.2283	11.0813	11.396	239512	7.04312e+06	387433	3.53977e+06	1.47251e+06		[M+Cl]- 160.079 [M-H-CH3]- 211.079	209		M195T11_3	y
341		3.04886	1.60827	4.28593	0.0467634	0.267477	UP	183.963	183.963	183.964	6.53794	6.49948	6.61828	573612	911171	108818	2.77803e+06	746556			12		M184T7	n
342		10.93	-3.45022	-3.76544	0.047272	0.268371	DOWN	313.967	313.967	313.967	7.10714	7.0308	7.18348	16803.4	33177.5	13423.8	2506.32	4341.07			73		M314T7_2	y
343		1.77872	0.830842	4.04949	0.0473611	0.268526	UP	73.0297	73.0295	73.0297	20.0822	19.9928	20.1665	112869	1.22354e+06	90100.2	2.17634e+06	397448		[M-H-CO2]- 118.027	116		M73T20	y
344		12.202	3.60905	4.41773	0.0475828	0.26891	UP	128.055	128.055	128.055	9.28872	8.9988	9.44537	433662	467596	25594	5.70561e+06	2.0535e+06	[16][M+1]-		4		M128T9_2	n
345		10.7678	-3.42865	-4.2645	0.0478822	0.269425	DOWN	697.12	697.119	697.121	17.4262	17.4075	17.4488	89269.9	1.04842e+06	383002	97366.3	50181.3			3		M697T17	n
346		16.205	4.01836	4.39889	0.0479439	0.269531	UP	84.0455	84.0455	84.0457	9.30378	9.04995	9.45902	112457	95180.4	9220.11	1.54239e+06	569762			4		M84T9	y
347		2.13389	-1.09349	-2.94235	0.0481621	0.269903	DOWN	182.977	182.977	182.977	2.16552	2.15538	2.17565	686109	2.69625e+06	487160	1.26354e+06	688457			77		M183T2_2	n
348		6.31829	2.65953	4.19773	0.0484479	0.270387	UP	168.043	168.043	168.044	16.8298	16.6333	16.9305	1.34485e+06	3.9412e+06	1.2855e+06	2.49016e+07	8.55252e+06			93		M168T17_3	y
349		1.48623	0.571659	3.10629	0.0485891	0.270625	UP	204.005	204.004	204.005	17.4198	17.1103	17.776	46510.1	316985	74401.7	471114	43014.6		[M+Cl]- 169.035	3		M204T17	n
350		9.31659	-3.2198	-4.34742	0.0487214	0.270846	DOWN	128.035	128.035	128.036	17.4664	17.3022	17.6278	15622312	2.0083e+08	7.13573e+07	2.15561e+07	3.0904e+06	[17][M]-		3		M128T17	y
351		470.8	-8.87897	-4.35474	0.0488936	0.271133	DOWN	288.054	288.053	288.054	18.3957	18.238	18.5667	67393.3	797033	316440	1428.37	1357.9	[100][M+1]-		29		M288T18	n
352		2.07127	-1.05051	-2.94942	0.0489138	0.271167	DOWN	110.986	110.986	110.986	6.93844	6.8879	7.06082	34737.9	298532	74805.1	144130	51241.6			147		M111T7_2	y
353		3.178	1.66812	4.28852	0.0491492	0.271557	UP	181.966	181.966	181.967	6.53794	6.49948	6.61828	2.11461e+06	3.22106e+06	229403	1.02365e+07	2.82411e+06			12		M182T7_1	n
354		2.04294	1.03065	3.11539	0.0492841	0.27178	UP	559.596	559.595	559.596	6.80525	6.77883	6.9504	55675.7	109916	31260.3	224551	55540.7			110		M560T7	n
355		1.44656	0.532622	2.79186	0.0493977	0.271966	UP	264.01	264.01	264.011	26.1247	26.1127	26.2305	25540.4	179440	34140.4	259570	36134.9			398		M264T26	y
356		2.67734	1.4208	4.01746	0.0494528	0.272057	UP	386.022	386.021	386.022	16.8625	16.8235	16.9015	48860	174678	25533.8	467673	123712			93		M386T17_2	y
357		8.93101	3.15882	4.29872	0.0497169	0.272488	UP	125.036	125.036	125.036	9.30508	9.30258	9.45902	205107	455902	66378.1	4.07166e+06	1.45536e+06			4		M125T9	y
358		3.28103	1.71415	4.2925	0.0497359	0.272518	UP	299.881	299.88	299.881	6.53961	6.51363	6.62507	240337	356007	17113.9	1.16807e+06	327225	[110][M+2]-		12		M300T7_1	n
359		4.69011	2.22962	4.25362	0.0502922	0.273619	UP	325.185	325.184	325.185	2.42083	2.36528	2.43843	40591.8	38788	3855.03	181920	58155			162		M325T2	y
360		1.43403	0.520076	3.25199	0.0505534	0.27413	UP	157.034	157.034	157.034	26.1941	26.1277	26.2848	18998	142667	29758.5	204589	14217.1	[31][M+1]-		245		M157T26	n
361		1.72554	0.787048	3.03153	0.0506424	0.274303	UP	337.056	337.056	337.057	26.331	26.2615	26.3463	28034.4	190696	67979.2	329053	40345			214		M337T26	y
362		1.34071	0.422999	3.00502	0.0509615	0.274922	UP	220.871	220.871	220.872	6.9391	6.8879	7.10713	716840	7.82598e+06	796574	1.04924e+07	1.31432e+06			147		M221T7_1	y
363		1.58787	0.667095	3.18516	0.0512047	0.27539	UP	245.114	245.114	245.115	17.9908	17.904	18.1215	78588.8	752205	107702	1.1944e+06	214995			37		M245T18	y
364		4.91882	-2.29831	-4.16007	0.0512129	0.275406	DOWN	544.054	544.054	544.054	17.4053	17.3932	17.4175	58844.2	458747	151323	93263.7	16034			106		M544T17	n
365		34.8319	-5.12234	-4.21778	0.0516163	0.276176	DOWN	309.032	309.032	309.033	18.3798	18.2088	18.5812	231265	3.04877e+06	1.21517e+06	87528.2	46250.3		[2M-H]- 155.024	29		M309T18	y
366		16.1097	-4.00986	-3.83789	0.0518412	0.276601	DOWN	427.033	427.033	427.034	17.9276	17.9053	17.9498	27643.1	235069	96894.6	14327.2	23147.9			37		M427T18	y
367		1.54597	-0.628509	-2.98895	0.0518966	0.276706	DOWN	556.113	556.113	556.113	17.3836	17.3307	17.4365	51542	528090	92566.9	341592	55776.8		[M-2H+Na]- 535.137 [M-H]- 557.12	106		M556T17	y
368		9.08613	3.18367	4.19523	0.052099	0.277087	UP	381.101	381.101	381.102	9.26988	9.02108	9.37367	1.60763e+06	2.33823e+06	314530	2.12454e+07	7.79973e+06	[168][M]-	[M-H+HCOOH]- 336.103	4		M381T9	y
369		1.29462	-0.372534	-3.01138	0.0524185	0.277684	DOWN	330.868	330.868	330.868	12.7011	12.6945	12.7077	40358.4	845747	55555.1	653275	95754.1			137		M331T13_2	n
370		1.82645	0.869039	3.25335	0.0528072	0.278404	UP	508.902	508.901	508.902	23.2483	23.2397	23.257	48348.9	427760	77263.3	781280	171620		[M-2H+Na]- 487.927	105		M509T23	n
371		9.81204	-3.29455	-4.08445	0.0530788	0.278903	DOWN	385.124	385.123	385.124	24.4412	24.4033	24.5108	35853.9	257793	97651.2	26273.1	10160.5		[M-H]- 386.124	66		M385T24	y
372		1.39006	0.475149	3.29775	0.0534747	0.279625	UP	164.879	164.879	164.879	6.99042	6.903	7.19343	145275	1.19247e+06	95249.1	1.65761e+06	224968			94		M165T7_2	n
373		1.16577	-0.221282	-2.73775	0.0538393	0.280283	DOWN	114.937	114.937	114.937	10.7994	10.717	10.8818	329502	4.51324e+06	260253	3.87147e+06	311639			212		M115T11_2	n
374		31.5986	-4.98179	-4.09695	0.0539406	0.280465	DOWN	188.958	188.957	188.958	41.0503	40.9598	41.1377	16097.7	253432	103640	7755.78	6805.62			367		M189T41	n
375		1.19329	0.254946	2.70241	0.0539607	0.280501	UP	129.039	129.039	129.039	7.37307	7.36228	7.38385	104526	1.25554e+06	110218	1.49822e+06	109754	[18][M+1]-		25		M129T7	n
376		3.66494	1.87379	4.05382	0.0540606	0.28068	UP	297.884	297.883	297.884	6.54456	6.51363	6.62507	250648	343523	38035.2	1.25899e+06	389293	[110][M+1]-		12		M298T7_1	n
377		6.6882	2.74162	3.98793	0.0541177	0.280782	UP	228.065	228.064	228.065	16.8442	16.6333	16.96	2.05406e+06	5.72253e+06	1.91387e+06	3.82734e+07	1.40075e+07		[M-2H+Na]- 207.094 [M-H-CH2]- 243.075	93		M228T17	y
378		32.7306	-5.03257	-4.11258	0.0542948	0.281098	DOWN	458.927	458.926	458.928	18.3798	18.238	18.5812	75435.3	999977	408221	30551.8	7035.6		[M-2H+Na]- 437.953	29		M459T18	n
379		7.51209	-2.90922	-3.99732	0.054368	0.281228	DOWN	182.044	182.044	182.044	19.9782	19.9042	20.2407	59402.9	1.04912e+06	390983	139657	49238.4		[M+Cl]- 147.075 [M-H]- 183.051	356		M182T20	n
380		2.30517	1.20487	3.90272	0.0547171	0.281845	UP	349.025	349.024	349.025	8.86073	8.63977	8.86882	805281	6.21273e+06	596064	1.43214e+07	3.54898e+06	[152][M]-		71		M349T9	y
381		18.6275	-4.21936	-4.02045	0.0547558	0.281913	DOWN	187.042	187.042	187.042	17.1138	17.1062	17.1215	23792.6	83557.2	33889.8	4485.7	3448.11		[M-H]- 188.05	183		M187T17	n
382		3.77347	1.91589	3.80868	0.0550028	0.282368	UP	140.986	140.986	140.987	6.60672	6.58722	6.71362	60045.9	77978.6	19758.8	294250	96347.3		[M-H]- 141.994 [M-H]- 141.994	12		M141T7	n
383		5.72683	2.51774	4.05567	0.0556994	0.283638	UP	145.062	145.062	145.062	14.5201	14.3912	14.6491	1.03726e+06	864657	31347.9	4.95174e+06	1.74519e+06			150		M145T15	y
384		3.96037	1.98564	3.04949	0.0563514	0.284809	UP	93.0201	93.0194	93.0202	6.55692	6.54295	6.67193	637721	678351	515434	2.68652e+06	1.0175e+06		[M-H+Cl]2- 152.086	12		M93T7_4	n
385		2.4056	-1.2664	-3.8414	0.0565127	0.285095	DOWN	172.036	172.036	172.036	9.34624	9.30258	9.3899	40391.8	630748	27211.8	262200	163932			4		M172T9_1	y
386		1.77919	0.831224	3.30639	0.0568669	0.285722	UP	298.919	298.919	298.92	23.2553	23.2292	23.3482	270820	1.67841e+06	244276	2.98622e+06	640066		[M-H]- 299.93	30		M299T23	n
387		6.79932	2.76539	4.0093	0.0569017	0.285783	UP	417.795	417.795	417.796	6.52129	6.51363	6.63993	88704.7	53884.6	2117.41	366378	134983			68		M418T7	n
388		1.90029	0.926223	2.98686	0.0577658	0.287288	UP	404.054	404.054	404.055	22.58	22.3682	22.6927	89686.3	895150	216876	1.70105e+06	413962			16		M404T23	y
389		5.05955	2.33901	3.92218	0.0585195	0.288578	UP	294.957	294.956	294.957	9.389	9.35153	9.5613	4.03706e+06	1.10759e+07	1.2548e+06	5.6039e+07	1.98162e+07	[106][M]-	[M-2H+Na]- 273.982	4		M295T9_2	n
390		6.98597	2.80446	3.72664	0.0587728	0.289006	UP	471.759	471.759	471.761	6.52772	6.50922	6.6103	51995	21233.8	10688.4	148339	58100.3		[M+Cl]- 436.796	12		M472T7_1	n
391		7.9207	2.98563	3.9024	0.0589127	0.289242	UP	413.801	413.801	413.802	6.57046	6.51363	6.62507	80240.7	48043.6	10221.4	380539	147221			12		M414T7_1	n
392		2.02203	1.0158	2.61516	0.0591111	0.289574	UP	374.246	374.245	374.246	1.39325	1.37475	1.40341	18294.2	28397.5	13495.7	57420.4	13688.1		[M+Cl]- 339.276 [M-H]- 375.253	9		M374T1	y
393		2.5361	-1.34261	-2.98797	0.059913	0.290905	DOWN	318.932	318.932	318.933	10.0955	9.97517	10.233	80552.3	1.35951e+06	212611	536062	427365			31		M319T10	y
394		9.95902	-3.316	-3.89273	0.0600147	0.291072	DOWN	98.025	98.0248	98.025	17.7756	17.7332	17.8978	6466463	1.15236e+08	4.61146e+07	1.1571e+07	990939	[2][M]-		51		M98T18	y
395		6.22268	-2.63754	-3.7935	0.060021	0.291082	DOWN	173.021	173.02	173.021	17.6064	17.5142	17.6987	76741	759456	288787	122046	36074.7		[2M-2H+Na]- 76.0177	176		M173T18	n
396		2.42462	-1.27776	-3.12287	0.0600838	0.291185	DOWN	532.793	532.793	532.794	1.58149	1.57437	1.59274	199448	299744	89824.2	123625	38382.9			23		M533T2	n
397		3.93822	1.97754	3.83433	0.0602435	0.291446	UP	357.84	357.839	357.84	6.53961	6.51363	6.62507	245362	278579	32941.6	1.09711e+06	368276			12		M358T7	n
398		25.8363	4.69133	3.86194	0.0603273	0.291583	UP	197.026	197.026	197.026	7.38007	7.36893	7.3912	39119.9	13160.6	8507.55	340020	146347	[55][M+1]-		25		M197T7_2	n
399		2.05344	1.03805	3.5978	0.0607371	0.292248	UP	270.963	270.963	270.964	5.83108	5.68587	6.0145	29215.3	83395.6	8883.06	171248	41350.6		[M-H]- 271.97	41		M271T6	y
400		3.66546	1.87399	2.66407	0.060917	0.292538	UP	100.961	100.961	100.961	5.32569	5.31388	5.3375	289314	1.15242e+06	1.19458e+06	4.22415e+06	1.60043e+06			22		M101T5_1	n
401		4.23421	2.08209	3.86043	0.0609259	0.292552	UP	299.097	299.097	299.097	9.32502	9.28872	9.36132	46920.5	119733	3887.44	506972	173699			4		M299T9	y
402		2.24263	-1.16519	-3.25172	0.0610914	0.292818	DOWN	182.977	182.977	182.977	7.24821	7.23222	7.2642	259880	8.76121e+06	872820	3.90666e+06	2.43405e+06	[44][M+2]-		25		M183T7	n
403		5.57949	2.48013	3.81205	0.0614799	0.293437	UP	116.036	116.035	116.036	6.59802	6.54218	6.94805	1.49411e+06	3.19598e+06	465960	1.78319e+07	6.63367e+06	[8][M]-	[M-H]- 117.043	12		M116T7	y
404		21.4387	-4.42214	-3.69967	0.0615363	0.293527	DOWN	185.989	185.989	185.99	36.4632	36.4528	36.4975	8924.35	82122.8	36363.3	3566.03	5503.51	[47][M+1]-		160		M186T36	n
405		3.17065	1.66478	2.60869	0.0615899	0.293612	UP	102.534	102.534	102.534	5.80461	5.75625	5.85297	8887.63	12360.3	11714.9	40028.9	14150.7		[M-H]- 103.544	41		M103T6_1	n
406		11.4789	3.52092	3.53044	0.0619325	0.294153	UP	166.018	166.018	166.018	5.37912	5.35218	5.41147	41504.1	15571.2	17881.1	178740	78029.1			22		M166T5	y
407		1.99381	-0.995528	-2.56307	0.0624755	0.295003	DOWN	232.903	232.902	232.903	23.3767	23.3448	23.4357	75164	997407	240611	500252	234474			45		M233T23_2	n
408		2.7207	1.44398	3.77089	0.0628541	0.295589	UP	165.04	165.04	165.04	9.31786	9.30258	9.33313	70024.8	181963	9315.25	495066	143513		[M-H]- 166.048	4		M165T9	y
409		11.8552	3.56744	3.76346	0.063496	0.296572	UP	264.01	264.01	264.01	7.3726	7.354	7.3912	117021	101364	23138.2	1.20169e+06	505871		[M+Cl+NaCOOH]- 161.053 [M-H+NaCOOH]- 197.03 [M+Cl]- 229.041 [M-H]- 265.017	25		M264T7	y
410		1.91893	0.940302	2.58059	0.0643372	0.297841	UP	258.039	258.039	258.039	5.51957	5.4928	5.54172	150896	615754	236515	1.18159e+06	297141			21		M258T6_2	y
411		33.9185	5.084	3.7457	0.0643382	0.297842	UP	594.998	594.998	594.998	8.09957	8.08408	8.11505	50413.6	11666.1	4380.33	395696	177525		[M+Cl+NaCOOH]- 492.04 [M-H+NaCOOH]- 528.017	86		M595T8	n
412		13.9174	-3.79881	-3.73965	0.064582	0.298206	DOWN	103.06	103.059	103.06	17.549	17.5008	17.6582	556324	6.7337e+06	2.8942e+06	483834	52843.9	[3][M+1]-		3		M103T18	n
413		189.601	-7.56682	-3.74045	0.0646234	0.298268	DOWN	635.931	635.931	635.932	18.3507	18.3218	18.3795	21071.2	150485	69683.6	0	0			29		M636T18	n
414		6.88327	2.78309	3.66425	0.0647511	0.298457	UP	79.9574	79.9565	79.9576	6.56368	6.48522	6.62507	100232	126254	37843.5	869042	349062			12		M80T7	n
415		2.69432	1.42992	2.79986	0.0651505	0.299046	UP	744.499	744.499	744.499	6.90239	6.87285	6.93193	29030.5	27376.9	13827.9	73762.1	25143.2			14		M744T7_2	y
416		3.13038	1.64634	3.66053	0.0651783	0.299087	UP	119.976	119.976	119.976	6.58169	6.55692	6.69885	4.06948e+06	1.45478e+07	1.47143e+06	4.55401e+07	1.45906e+07	[13][M]-		12		M120T7	n
417		3.25268	1.70163	3.63952	0.065362	0.299357	UP	215.033	215.033	215.033	6.59672	6.54617	6.63993	93044.8	250248	30154.3	813978	266579			12		M215T7_2	y
418		3.25919	1.70451	3.65202	0.0657199	0.299878	UP	239.925	239.925	239.925	6.53794	6.51363	6.62507	324432	461718	46262.4	1.50483e+06	492549		[M+Cl]- 204.955 [M-H]- 240.932	12		M240T7_1	n
419		22.7927	4.5105	3.69429	0.0660184	0.30031	UP	245.031	245.031	245.031	8.10773	8.05713	8.15832	17957.4	3392.85	657.935	77332.3	34659.9		[M+Cl]- 210.062	86		M245T8	y
420		2.58519	-1.37027	-2.57394	0.0669002	0.301572	DOWN	201.15	201.15	201.15	48.5577	48.554	48.5992	14382.9	84396.3	20828.7	32381.5	28129.8			91		M201T49_2	y
421		51.3913	5.68345	3.65383	0.0673323	0.302181	UP	367.124	367.124	367.124	9.0966	9.07867	9.11453	41336.5	5978.83	2918.91	307260	142789		[M-H-HCOOH]- 414.123	71		M367T9	y
422		8.0089	-3.0016	-3.62294	0.0673508	0.302207	DOWN	98.025	98.025	98.0251	19.2127	19.168	19.2575	999630	1.7026e+07	7.10403e+06	2.12589e+06	525575			40		M98T19_1	y
423		2.35632	1.23654	2.87599	0.0680901	0.303238	UP	312.043	312.043	312.043	5.79618	5.75625	5.86667	28817.9	140328	48650	330658	103789			61		M312T6	y
424		74.9486	6.22783	3.62776	0.0682869	0.303509	UP	315.117	315.117	315.117	9.26383	9.11453	9.30258	102893	14042.5	2517.74	1.05246e+06	495781	[122][M+2]-		4		M315T9	n
425		1.67723	0.746084	3.17443	0.0683257	0.303563	UP	486.919	486.919	486.921	23.0375	22.9245	23.2543	92009.8	836274	93017.7	1.40263e+06	294685		[M-H]- 487.927	105		M487T23	n
426		3.54415	1.82544	3.26005	0.0683872	0.303647	UP	248.843	248.843	248.843	17.9767	17.9182	18.0353	1.10521e+06	1.37428e+07	4.92226e+06	4.87065e+07	1.79121e+07			37		M249T18_1	n
427		17.359	4.11762	3.61042	0.0684331	0.303711	UP	649.632	649.631	649.632	6.56901	6.52772	6.6103	52660.8	8005.68	2949.92	138971	62759.6		[M-H-COCH2]- 692.644	12		M650T7_2	n
428		5.81691	2.54025	3.51617	0.0686845	0.304055	UP	473.757	473.756	473.758	6.5316	6.51363	6.62507	114595	67248.8	21008.9	391180	158178		[M-2H+K]- 436.796 [M+Cl]- 438.793	12		M474T7	n
429		5.37037	2.42502	3.5697	0.0690939	0.304612	UP	243.06	243.06	243.06	8.96987	8.9495	8.9719	260429	817288	132969	4.38914e+06	1.72799e+06			71		M243T9_2	y
430		8.67554	-3.11695	-3.57482	0.0691033	0.304625	DOWN	289.034	289.034	289.034	26.5155	26.4625	26.5685	41304.5	461716	197431	53220.5	13938.3			310		M289T27	y
431		10.4588	3.38664	3.58279	0.0695061	0.305169	UP	294.956	294.956	294.957	8.9719	8.9495	9.14318	4.03706e+06	7.15569e+06	1.31977e+06	7.48397e+07	3.26942e+07	[105][M]-	[M-H-CH2]- 309.978	71		M295T9_1	n
432		1.18503	-0.244923	-2.50274	0.0702635	0.306179	DOWN	516.956	516.956	516.957	20.222	20.1505	20.3692	30172.3	255853	21800.5	215905	17002.6			228		M517T20	n
433		2.29523	-1.19864	-3.44118	0.0707334	0.306799	DOWN	100.953	100.953	100.953	9.30378	9.27443	9.33313	196785	6.99486e+06	287467	3.04756e+06	1.96589e+06		[M-2H+Na]- 79.971	4		M101T9_1	n
434		9.28663	-3.21516	-3.48813	0.071307	0.307547	DOWN	212.99	212.989	212.99	24.83	24.7462	24.835	45338.4	492693	217270	53054	21230.9		[M+Cl+HCOOH]- 132.025 [M-H+NaCOOH]- 146.018 [M-H+HCOOH]- 168.002 [M-H]- 214.005	103		M213T25_1	n
435		2.75939	-1.46435	-3.02851	0.071327	0.307573	DOWN	464.806	464.806	464.807	1.58712	1.58149	1.59274	75105.4	119494	41066.4	43304.5	14568.4			23		M465T2	n
436		5.74789	2.52303	3.17444	0.0713509	0.307604	UP	467.817	467.816	467.818	17.3402	17.0625	17.538	38249.5	66611.8	46965.4	382877	166048			27		M468T17	n
437		2.35421	-1.23524	-2.61798	0.0720983	0.308566	DOWN	380.845	380.844	380.845	1.59274	1.58149	1.60041	283255	423648	138094	179953	83214			23		M381T2_2	n
438		1.52667	-0.610391	-2.42629	0.0725579	0.309151	DOWN	270.812	270.812	270.813	17.3694	17.2073	17.4633	506092	9.13743e+06	1.53674e+06	5.98519e+06	1.64383e+06			106		M271T17	n
439		3.63195	-1.86074	-2.83473	0.0728346	0.3095	DOWN	179.056	179.056	179.057	5.37117	5.22873	5.78337	405349	5.52647e+06	2.23761e+06	1.52163e+06	990418			22		M179T5	y
440		8.89631	-3.15321	-2.94655	0.0732833	0.310063	DOWN	502.932	502.931	502.933	17.8663	17.7903	17.9423	21928.7	95784.3	47056.3	10237.6	17732.1			37		M503T18	n
441		4.17344	-2.06124	-3.14746	0.0733809	0.310185	DOWN	303.907	303.907	303.907	18.4497	18.1927	18.6577	75560.1	1.41855e+06	572504	339900	156783			283		M304T18_1	n
442		2.4423	1.28824	2.92305	0.0735011	0.310334	UP	366.961	366.961	366.962	23.0151	22.8997	23.1348	91551.2	734105	226458	1.7929e+06	585094		[M+Cl+NH3]- 314.972	105		M367T23	n
443		13.6573	-3.7716	-3.28447	0.074085	0.311056	DOWN	508.832	508.831	508.832	5.84765	5.72497	5.90917	13103.7	53133.2	25640.7	3625.9	4914.81		[M-H-CH2]- 523.855	41		M509T6	n
444		5.71869	-2.51569	-3.05322	0.0754496	0.312713	DOWN	157.012	157.012	157.012	5.74654	5.61357	5.94003	105278	786822	352801	137588	105728		[M+Cl+NaCOOH]- 54.0538 [M+Cl]- 122.039	61		M157T6	n
445		35.8513	-5.16396	-3.41671	0.0756996	0.313011	DOWN	421.085	421.085	421.086	24.4412	24.3887	24.4815	34309	164971	81235.5	4601.54	3165.69		[M+Cl]- 386.124	66		M421T24	y
446		3.15278	1.65663	3.36766	0.075733	0.313051	UP	200.837	200.837	200.838	6.77313	6.51363	6.83377	57121.8	121837	13931.5	384125	134179		[3M-2H+Na]- 59.9462	19		M201T7_1	n
447		44.045	5.46091	3.40352	0.0760752	0.313458	UP	457.944	457.944	457.944	7.3208	7.27932	7.36228	14462.7	794.07	1375.37	58280.4	29222.4			25		M458T7	n
448		351.154	-8.45596	-3.4125	0.0761835	0.313586	DOWN	442.071	442.07	442.071	18.3727	18.1938	18.5525	73154.1	850420	430540	2157.22	2067.02			29		M442T18	y
449		11.5439	3.52906	3.37367	0.0764014	0.313843	UP	371.073	371.072	371.073	9.35451	9.20123	9.54685	376960	164771	70989.9	1.9021e+06	889119		[M+Cl]- 336.103	4		M371T9	y
450		4.82646	2.27097	3.37175	0.0765379	0.314003	UP	355.842	355.842	355.843	6.5349	6.51363	6.62507	165479	182921	27986.6	882859	358464			12		M356T7_1	n
451		3.31041	1.72701	3.40112	0.0765784	0.314051	UP	169.046	169.046	169.046	16.6534	16.5154	16.7055	50420.3	215517	4374.89	713449	253539			143		M169T17	y
452		6.39121	-2.67609	-3.30706	0.0774441	0.315058	DOWN	129.039	129.039	129.039	17.4633	17.2735	17.6278	792560	9.68607e+06	4.24816e+06	1.51553e+06	514984	[17][M+1]-		3		M129T17_2	n
453		1.91066	0.934069	2.5226	0.0775807	0.315216	UP	268.984	268.983	268.984	23.0857	22.9687	23.1582	1.23746e+06	1.61089e+07	5.29799e+06	3.07785e+07	8.56645e+06	[89][M]-	[M+Cl+CF3COOH]- 100.017	105		M269T23	n
454		2.51385	-1.3299	-2.78898	0.0777672	0.31543	DOWN	127.602	127.601	127.602	50.7262	50.6533	50.799	528477	2.00958e+06	290817	799140	693192			1		M128T51	n
455		5.6313	2.49347	3.33741	0.0781777	0.315899	UP	415.798	415.798	415.799	6.53627	6.51363	6.61828	150487	127548	21690	718261	305800			12		M416T7	n
456		13.9626	-3.8035	-3.26223	0.0785104	0.316277	DOWN	174.041	174.041	174.041	23.756	23.7287	23.825	43375.2	207930	101535	14891.9	13971.9			225		M174T24	y
457		2.69332	-1.42939	-2.59452	0.0785846	0.316361	DOWN	182.989	182.989	182.989	58.9977	58.8997	59.0805	187655	2.88157e+06	576307	1.06963e+06	1.0635e+06			294		M183T59_1	y
458		2.88595	-1.52905	-2.99278	0.0789048	0.316722	DOWN	244.044	244.044	244.044	17.9498	17.8767	18.0168	30552	379039	40611.6	131340	137482		[M-2H+K]- 207.095	37		M244T18	y
459		89.7468	6.48779	3.3444	0.0789111	0.316729	UP	244.155	244.155	244.155	4.64421	4.62167	4.66675	20417.5	1057.6	926.933	118660	60898.8			404		M244T5	y
460		1.41747	-0.503322	-2.44302	0.07996	0.317896	DOWN	295.94	295.94	295.941	17.432	17.4222	17.5015	857988	1.48751e+07	2.57617e+06	1.04941e+07	1.73517e+06	[108][M]-	[M-2H+Na]- 274.966	3		M296T17_2	n
461		1.12446	-0.169228	-2.33754	0.0801898	0.318149	DOWN	346.988	346.988	346.989	18.4944	18.4077	18.5812	23703.3	447083	27137.7	397599	24656.7		[3M-H]- 116.008	283		M347T18	y
462		1.20548	-0.269603	-2.35933	0.0802353	0.318199	DOWN	116.935	116.935	116.935	10.9394	10.897	10.9818	153909	2.20362e+06	174760	1.82801e+06	213296			309		M117T11	n
463		2.30785	-1.20655	-2.476	0.0802974	0.318267	DOWN	225.987	225.987	225.987	17.0646	17.0477	17.0815	21088.9	81940.9	17303.4	35505.2	27491.2		[M+Cl]- 191.018	153		M226T17	n
464		1.39852	0.483904	2.57298	0.0805671	0.318562	UP	128.96	128.959	128.96	6.24465	6.21497	6.49305	7.88743e+06	6.42236e+07	8.14593e+06	8.98182e+07	1.51822e+07	[21][M]-		42		M129T6_2	n
465		1.39607	-0.481369	-2.80376	0.0811132	0.319155	DOWN	195.051	195.051	195.052	8.86947	8.79415	9.00045	873975	1.7224e+07	1.06763e+06	1.23375e+07	2.82357e+06	[54][M]-		71		M195T9_2	y
466		4.9391	-2.30425	-2.40656	0.0811193	0.319161	DOWN	260.886	260.886	260.886	2.52157	2.47122	2.57192	12163.2	56349.5	26755.4	10879.7	18844.3			144		M261T3	n
467		1.79346	-0.842747	-2.37366	0.0812939	0.319349	DOWN	214.049	214.049	214.049	5.46918	5.40223	5.54928	18980	183912	35832.9	102546	47340.3			22		M214T5	y
468		13.5979	3.76531	3.231	0.0822892	0.320411	UP	255.06	255.06	255.061	8.12105	7.90728	8.21332	534468	368022	213909	5.00432e+06	2.47617e+06	[80][M]-	[M-H+HCOOH]- 210.062 [M+Cl]- 220.091 [M-H]- 256.068	86		M255T8	y
469		1.37774	0.462303	2.34246	0.0828783	0.321031	UP	131.091	131.091	131.091	5.25482	5.24558	5.31388	34005.7	393203	67774.7	541732	86417.1	[22][M+1]-		22		M131T5	n
470		2.55051	1.35078	2.7525	0.0833995	0.321574	UP	398.951	398.951	398.952	1.68547	1.67912	1.69182	25226.1	18394	6466.14	46914.1	16741.3			5		M399T2_2	n
471		14.7149	3.87921	3.22845	0.0840097	0.322203	UP	267	267	267.001	9.35153	9.00678	9.41842	215897	257340	16697.3	3.78674e+06	1.89344e+06			4		M267T9	y
472		11.4685	3.5196	3.20915	0.0843154	0.322516	UP	593.669	593.669	593.669	6.55921	6.52288	6.59553	44515.4	7163.54	2108.64	82154.8	40419.5		[M-2H+K]- 556.709 [M+Cl]- 558.701	12		M594T7	n
473		9.09791	-3.18553	-3.20976	0.0846394	0.322846	DOWN	506.098	506.098	506.099	17.3526	17.1903	17.4075	218516	3.62544e+06	1.74035e+06	398492	58239.8			27		M506T17	y
474		7.16435	-2.84084	-3.20648	0.0848362	0.323045	DOWN	338.067	338.067	338.067	17.403	17.2743	17.5448	179204	3.0396e+06	1.41208e+06	424268	42745.3	[141][M+1]-		106		M338T17	n
475		5.55431	2.47361	3.16633	0.0851688	0.323381	UP	463.009	463.008	463.009	9.41972	9.3025	9.59028	131830	302218	67228.4	1.67862e+06	749911		[M+Cl]- 428.039 [M-H]- 464.016	4		M463T9	y
476		49.6014	5.63231	3.18415	0.085505	0.323718	UP	699.96	699.96	699.96	17.385	17.3212	17.4488	20366.8	1922.74	3330.28	121616	65023.2			106		M700T17	n
477		14.0279	3.81023	3.17261	0.0856014	0.323814	UP	187.991	187.991	187.991	7.27645	7.23385	7.31905	17249.5	7398.85	3588.95	103790	52501.2		[M-H-C6H8O6]- 365.02	25		M188T7_1	n
478		1.37328	-0.45763	-2.4632	0.0861386	0.324348	DOWN	116.935	116.935	116.935	12.7077	12.5623	12.8235	161136	1.97136e+06	327730	1.43551e+06	185928			137		M117T13_1	n
479		2.47035	1.30472	2.92983	0.0862008	0.324409	UP	178.018	178.018	178.019	5.92578	5.78668	6.08585	68488.1	145904	31192	360435	122931			297		M178T6_1	y
480		9.28432	3.2148	3.15835	0.0863106	0.324518	UP	187.073	187.072	187.073	8.14237	7.87597	8.33473	1.90838e+06	2.0625e+06	630467	1.91489e+07	9.349e+06	[49][M]-		97		M187T8	y
481		8.224	-3.03984	-3.10985	0.0867397	0.324939	DOWN	213.002	213.002	213.002	24.8126	24.7923	24.8328	45338.4	386607	187876	47009.5	21833.4		[M+Cl+HCOOH]- 132.025 [M-H+NaCOOH]- 146.018 [M-H+HCOOH]- 168.002 [M-H]- 214.005	103		M213T25_2	n
482		2.89159	-1.53186	-3.08366	0.0872118	0.325399	DOWN	375.019	375.019	375.02	17.432	17.4222	17.5353	75265.9	1.05734e+06	385161	365662	50888.7		[2M-2H+K]- 169.035	3		M375T17	y
483		1.67481	0.743996	2.28347	0.0874854	0.325664	UP	232.903	232.902	232.903	22.6142	22.397	22.8138	50494.3	621902	199645	1.04157e+06	247934			16		M233T23_1	n
484		48.1443	-5.58929	-3.15003	0.0875637	0.32574	DOWN	222.039	222.038	222.039	25.986	25.9672	26.0048	13997.2	102596	55221.2	2131	1465.08		[M-2H+Na]- 201.065	224		M222T26	y
485		1.57294	-0.65346	-2.24836	0.0885085	0.326645	DOWN	170.044	170.044	170.044	22.2639	22.185	22.3928	60322.7	1.53485e+06	319759	975785	288514			54		M170T22	n
486		1.65721	0.728759	2.34784	0.0892088	0.327306	UP	275.022	275.022	275.022	24.0195	24.0165	24.0437	76422.2	283334	114972	469546	75181.9			18		M275T24_2	y
487		2.92278	1.54734	3.11086	0.0895761	0.32765	UP	449.088	449.088	449.09	9.35863	9.35153	9.4906	353127	1.28111e+06	25472.6	3.74439e+06	1.37126e+06		[M+Cl]- 414.119 [M-H]- 450.096	4		M449T9_2	y
488		2.66192	1.41247	2.81044	0.089825	0.327882	UP	562.59	562.589	562.591	6.70315	6.57355	6.99088	982598	4.50887e+06	1.28126e+06	1.20022e+07	4.43681e+06	[209][M]-	[M+Cl]- 527.623	43		M563T7_1	n
489		4.32566	2.11292	3.07502	0.0898339	0.32789	UP	359.837	359.836	359.837	6.53558	6.51363	6.62507	122636	119806	19160.5	518240	223604			12		M360T7	n
490		3.43643	1.78091	3.01746	0.0901765	0.328207	UP	121.972	121.972	121.972	6.59848	6.57188	6.6894	202218	512628	99589.4	1.76161e+06	709976	[13][M+2]-		12		M122T7	n
491		29.382	4.87686	3.09784	0.0902193	0.328247	UP	535.96	535.96	535.96	7.35014	7.30908	7.3912	56725.4	15343.9	4878.9	450836	243441		[M+Cl]- 500.991 [M-H]- 536.967	25		M536T7	n
492		1.50499	0.589757	2.25076	0.0906609	0.328653	UP	172.067	172.067	172.067	6.65228	6.57355	6.82355	59970.2	327161	79665.3	492375	99084.7		[M-H]- 173.073 [M-H-C6H8O6]- 349.115	12		M172T7	n
493		2.02272	1.0163	2.45737	0.0910908	0.329046	UP	860.853	860.853	860.856	1.70912	1.70635	1.779	657285	1.82083e+06	603283	3.68304e+06	1.1657e+06	[272][M]2-		5		M861T2_1	n
494		1.59386	0.672524	2.21955	0.0914061	0.329332	UP	246.047	246.047	246.047	11.1603	11.0905	11.2544	44465.9	330200	102348	526292	113758		[M+Cl]- 211.079	209		M246T11	y
495		1.49623	0.581332	2.32724	0.0914301	0.329354	UP	84.9908	84.9907	84.991	1.68932	1.67758	1.73765	151136	1.17728e+06	236575	1.76149e+06	364799			5		M85T2	n
496		2.46851	-1.30364	-2.49833	0.0923424	0.330173	DOWN	114.937	114.936	114.937	59.9398	59.7358	59.9715	168846	2.72243e+06	479068	1.1026e+06	1.01569e+06			302		M115T60	n
497		1.44817	0.534229	2.22192	0.0924386	0.330259	UP	190.059	190.058	190.059	6.73579	6.58672	7.04493	84172.2	1.23623e+06	330754	1.79027e+06	277725		[M-H+NaCOOH]- 123.081	43		M190T7	n
498		1.30103	0.37965	2.93934	0.0924523	0.330271	UP	194.893	194.893	194.893	19.1793	19.1467	19.212	762920	4.77015e+07	1.42695e+06	6.20609e+07	8.3403e+06			40		M195T19	n
499		4.40132	2.13793	2.91656	0.0926296	0.330429	UP	205.018	205.018	205.018	8.85648	8.6989	9.00678	120887	486646	180100	2.14188e+06	966354		[M-3H]3- 618.08	71		M205T9_2	y
500		15.6932	3.97207	3.04987	0.0927594	0.330544	UP	399.986	399.986	399.986	7.35787	7.33887	7.37687	110467	63833.9	5827.1	1.00176e+06	532625		[M+Cl]- 365.02	25		M400T7	y
501		3.12024	-1.64166	-2.21656	0.0929882	0.330746	DOWN	228.994	228.994	228.995	51.2022	51.0392	51.312	300420	1.34189e+07	4.58116e+06	4.30035e+06	5.45748e+06			95		M229T51_1	y
502		5.63855	2.49532	2.93663	0.0930888	0.330835	UP	531.715	531.714	531.716	6.53961	6.51363	6.6103	81451.7	49562.7	21965	279462	133806		[M+Cl]- 496.751	12		M532T7	n
503		1.68961	-0.75669	-2.54293	0.093815	0.331471	DOWN	117.02	117.019	117.02	18.2611	18.1575	18.3647	162759	3.03247e+06	776011	1.79477e+06	329385			305		M117T18_3	y
504		3.42952	1.77801	2.45764	0.0938724	0.331521	UP	183.028	183.028	183.028	23.735	23.7287	23.7413	214865	497877	765888	1.70748e+06	374349			225		M183T24	y
505		1.46609	-0.551978	-2.89161	0.0938838	0.331531	DOWN	215.838	215.838	215.838	10.0586	10.0438	10.233	255401	1.38135e+07	488248	9.42195e+06	2.58477e+06			31		M216T10	n
506		16.5394	4.04784	3.0191	0.0939869	0.33162	UP	160.061	160.048	160.062	6.81058	6.53293	7.12153	642249	610632	238766	1.00995e+07	5.43851e+06			110		M160T7	y
507		2.00592	1.00426	2.71408	0.0939917	0.331625	UP	128.035	128.035	128.035	7.3726	7.354	7.3912	2.03304e+06	2.71681e+07	5.13974e+06	5.4497e+07	1.6666e+07	[18][M]-	[M+Cl]- 93.0659 [M-H]- 129.043	25		M128T7_2	y
508		3.80845	-1.92921	-2.67476	0.0943099	0.3319	DOWN	102.972	102.971	102.972	6.89642	6.8879	6.90493	14865079	1.18908e+08	1.78339e+07	3.12222e+07	5.3908e+07		[M-H]- 103.972	14		M103T7_2	n
509		1.60532	0.682858	2.18513	0.0943493	0.331934	UP	356.942	356.942	356.943	22.7068	22.5808	22.7347	43876.2	393765	130459	632118	136657			259		M357T23	y
510		2.32079	-1.21462	-2.51623	0.0945223	0.332083	DOWN	382.843	382.843	382.843	1.58712	1.58149	1.59274	80926.3	117509	42179.7	50633.1	18439.3			23		M383T2	n
511		73.3504	-6.19673	-3.01303	0.0947076	0.332243	DOWN	287.05	287.05	287.05	18.326	18.1938	18.5525	896545	7.9011e+06	4.47958e+06	107717	64614.4	[100][M]-		29		M287T18	y
512		1.56512	0.646275	2.19563	0.094742	0.332272	UP	150.033	150.033	150.033	6.96346	6.94618	7.16477	61977.9	235458	79778	368520	68218.4			94		M150T7_2	y
513		2.41345	-1.2711	-2.72351	0.0959793	0.333323	DOWN	240.995	240.994	240.995	53.9122	53.9115	54.043	61818.2	829741	84102.7	343535	297552			249		M241T54	y
514		5.51165	2.46248	2.97727	0.0962216	0.333527	UP	152.012	152.012	152.012	6.60672	6.51363	6.63993	54514.9	30980.3	3795.03	170752	81224.8		[M+Cl]- 117.043	12		M152T7	y
515		2.64712	1.40442	2.86339	0.0964476	0.333716	UP	259.982	259.982	259.983	6.47921	6.45208	6.55043	308759	238615	41461.7	631643	234097		[M+Cl+CF3COOH]- 91.0293 [M-H+CF3COOH]- 127.007 [M+Cl+NaCOOH]- 157.026 [M-H+NaCOOH]- 193.002 [M-H+HC	68		M260T6	n
516		1.71062	0.774516	2.61629	0.0966145	0.333855	UP	343.092	343.092	343.093	22.8658	22.8533	22.9777	44986.9	318158	49173.2	544246	141368			78		M343T23_4	y
517		2.02736	1.0196	2.16944	0.096714	0.333938	UP	172.098	172.098	172.098	2.42503	2.2548	2.62717	946689	1.29092e+07	7.89227e+06	2.61716e+07	7.05896e+06			162		M172T2	y
518		2.10114	1.07117	2.94561	0.0968302	0.334034	UP	685.132	685.131	685.133	9.31392	9.25418	9.37367	38164.1	87257.9	4830.1	183341	56291.1		[M+Cl+NaCOOH]- 582.173 [M-H+NaCOOH]- 618.15	4		M685T9	n
519		3.45521	-1.78877	-2.93287	0.0971672	0.334313	DOWN	534.129	534.129	534.129	17.403	17.3542	17.4075	100974	1.8055e+06	754244	522545	71992.6		[M-H]- 535.137	106		M534T17	y
520		1.83663	0.877062	2.62453	0.0976855	0.33474	UP	327.983	327.982	327.983	22.7347	22.5548	23.3298	115653	1.43998e+06	250691	2.64471e+06	754499			259		M328T23_3	y
521		2.8666	-1.51934	-2.90145	0.0979223	0.334933	DOWN	248.097	248.097	248.098	20.8318	20.7633	20.9803	23446.6	259223	100069	90428.7	11813	[70][M+1]-		285		M248T21	n
522		1.90283	-0.928149	-2.26179	0.0982398	0.335192	DOWN	71.014	71.0139	71.0141	5.35447	5.32797	5.36077	87160.6	807984	247287	424622	158225			22		M71T5	y
523		1.28551	0.362342	2.36899	0.0986543	0.335527	UP	672.862	672.861	672.863	2.01177	1.99195	2.15522	670333	4.34771e+06	416812	5.58902e+06	806194			213		M673T2_1	n
524		2.75402	1.46154	2.57096	0.0992303	0.33599	UP	267.073	267.073	267.073	5.91819	5.84443	5.99195	31173.1	110497	43636.6	304310	123064		[M-H]- 268.078	41		M267T6_3	y
525		3.27464	1.71134	2.90881	0.0996439	0.336319	UP	124.008	124.007	124.008	6.53132	6.44177	6.6103	17206762	2.27734e+07	2.03572e+06	7.45746e+07	3.07778e+07	[15][M]-		12		M124T7_3	y
526		2.69905	-1.43245	-2.85129	0.100304	0.336841	DOWN	156.028	156.028	156.028	7.50369	7.45533	7.55205	22891.7	271945	103128	100756	13370.8			60		M156T8	n
527		3.09521	1.63004	2.21042	0.100576	0.337055	UP	307.912	307.912	307.913	6.52631	6.47117	6.58145	77733.4	26115.7	24165.4	80833.6	35417.4		[M+Cl+NaCOOH]- 204.955 [M-H+NaCOOH]- 240.932	12		M308T7_1	n
528		1.46113	0.547081	2.86995	0.101042	0.337419	UP	125.018	125.018	125.018	5.95867	5.75625	6.20735	177101	1.59739e+06	40649.8	2.33399e+06	442685			297		M125T6_2	y
529		1.41895	0.504822	2.56817	0.10138	0.337681	UP	249.055	249.055	249.055	19.9039	19.8752	19.9327	41839	491389	44298.5	697255	131586			356		M249T20_2	y
530		3.83254	1.9383	2.88787	0.101555	0.337816	UP	126.003	126.003	126.004	6.52065	6.44177	6.6103	741712	796000	52419.9	3.05071e+06	1.35128e+06		[M+Cl]- 91.0293 [M-H]- 127.007	68		M126T7_2	n
531		1.45917	0.545144	2.295	0.102178	0.338295	UP	128.96	128.96	128.96	5.55787	5.43752	5.79925	29121960	3.31425e+08	5.55301e+07	4.83604e+08	1.00534e+08	[20][M]-	[M+Cl]- 93.9904 [M+Cl]- 93.9904	21		M129T6_1	n
532		1.33704	0.419042	2.30894	0.102556	0.338583	UP	158.979	158.979	158.979	29.2623	29.2188	29.3378	145432	2.9414e+06	350295	3.93277e+06	656007		[M+Cl]- 124.007 [M-H]- 159.984	232		M159T29_1	n
533		3.27822	-1.71291	-2.24235	0.10262	0.338632	DOWN	182.989	182.989	182.989	55.0782	54.8108	55.4743	296696	5.20295e+06	2.38693e+06	1.58686e+06	1.45062e+06			141		M183T55_1	y
534		1.92125	-0.942044	-2.25054	0.102889	0.338835	DOWN	298.881	298.881	298.881	1.58149	1.57437	1.59274	144619	243601	77279.9	126793	45927.5			23		M299T2	n
535		1.90431	0.92927	2.12069	0.103901	0.339595	UP	104.954	104.954	104.954	6.83377	6.53293	7.241	7090809	1.01183e+08	4.7396e+07	1.92683e+08	5.77797e+07		[M+Cl]- 69.9826	14		M105T7_1	n
536		24.3705	4.60706	2.85206	0.103981	0.339655	UP	467.973	467.973	467.973	7.36503	7.33887	7.3912	86285	28563.4	8841.52	696103	405300		[M+Cl+NaCOOH]- 365.02	25		M468T7	n
537		6.76821	2.75878	2.76307	0.104059	0.339712	UP	194.049	194.049	194.049	4.94958	4.94573	4.95343	15470.1	12386.7	7037.13	83836	44232.2			80		M194T5	y
538		2.48312	-1.31215	-2.09924	0.104185	0.339806	DOWN	114.937	114.936	114.937	59.1548	59.0657	59.2662	174513	6.14612e+06	2.05458e+06	2.4749e+06	2.22575e+06			300		M115T59	n
539		1.60923	-0.686372	-2.67907	0.104626	0.340132	DOWN	133.171	133.171	133.171	24.008	23.9882	24.0453	313939	1.26195e+06	301422	784192	67436.4			18		M133T24_7	n
540		15.2158	3.9275	2.83406	0.104729	0.340208	UP	331.998	331.998	331.999	7.3912	7.33887	7.45202	131757	81040.8	32042.4	1.2331e+06	703361		[M+Cl+NaCOOH]- 229.041 [M-H+NaCOOH]- 265.017	25		M332T7	n
541		1.63275	0.707302	2.28274	0.105045	0.34044	UP	902.833	902.832	902.834	1.72085	1.7094	1.72367	155811	456271	103242	744975	193202			5		M903T2_1	n
542		1.98091	-0.986163	-2.09149	0.105334	0.340651	DOWN	333.939	333.938	333.939	4.48003	4.37488	4.59125	177460	1.29451e+06	393501	653494	356320			100		M334T4	n
543		1.43906	0.525122	2.19712	0.105734	0.340943	UP	130.958	130.958	130.958	5.54808	5.43752	5.57002	2.19746e+06	2.55229e+07	4.69811e+06	3.67288e+07	7.4811e+06	[20][M+2]-		21		M131T6_1	n
544		1.37729	0.461833	2.56378	0.105781	0.340976	UP	473.969	473.968	473.97	25.8164	25.7347	25.8975	78998.8	799857	58314	1.10164e+06	195359			59		M474T26	y
545		1.71306	-0.776576	-2.17135	0.106124	0.341225	DOWN	600.782	600.781	600.782	1.58712	1.57437	1.60041	210830	316649	87704.4	184844	57983.2			23		M601T2	n
546		1.49847	0.583487	2.77691	0.106429	0.341444	UP	129.039	129.039	129.039	9.28321	9.26383	9.30258	169458	2.3251e+06	73979.2	3.48409e+06	719103	[16][M+2]-		4		M129T9	n
547		1.32638	-0.407492	-2.26515	0.106539	0.341523	DOWN	148.044	148.044	148.044	6.15777	6.03632	6.24532	106729	1.18154e+06	105168	890806	195866			326		M148T6	y
548		1.57442	-0.654823	-2.80455	0.106911	0.341789	DOWN	184.864	184.864	184.864	0.214799	0.085781	0.322942	91061.5	2.63913e+06	16690.5	1.67625e+06	594426			90		M185T0	n
549		1.29141	0.368945	2.06827	0.107878	0.342473	UP	372.937	372.936	372.937	1.29515	1.22608	1.37855	393105	5.53471e+06	916469	7.14757e+06	992173	[160][M+1]-		9		M373T1	n
550		1.78969	-0.839708	-2.22913	0.108058	0.3426	DOWN	296.883	296.882	296.883	1.5925	1.57437	1.60041	778946	1.29631e+06	387784	724324	217141			23		M297T2	n
551		1.14434	-0.194516	-2.06258	0.108432	0.342861	DOWN	242.065	242.065	242.065	13.8401	13.592	14.1427	187791	2.89164e+06	209408	2.52691e+06	223516			293		M242T14	y
552		3.22858	1.6909	2.43158	0.108562	0.342952	UP	572.619	572.618	572.619	6.94618	6.87285	7.15037	57653.8	93576.5	51787.2	302119	139228			147		M573T7_1	n
553		1.31483	-0.39488	-2.30677	0.108655	0.343017	DOWN	330.868	330.868	330.869	13.2582	13.1136	13.3048	40177.2	386202	29801.1	293727	62715.1			372		M331T13_1	n
554		1.99924	0.99945	2.5649	0.10871	0.343055	UP	646.859	646.858	646.86	7.24228	7.18848	7.53123	663979	3.49499e+06	612987	6.98731e+06	2.27727e+06		[M-H-CO]- 675.863	25		M647T7_4	n
555		130.004	7.02241	2.77771	0.108822	0.343132	UP	312.547	312.546	312.548	9.40927	9.33088	9.48767	62341.1	558.813	967.893	141437	87839.8			4		M313T9_1	n
556		2.15327	-1.10653	-2.53374	0.109125	0.343342	DOWN	378.091	378.091	378.091	20.2991	20.2718	20.3263	33152.3	445680	156762	206978	45297.8			115		M378T20_2	y
557		1.42205	0.507968	2.19441	0.110123	0.344026	UP	320.093	320.092	320.093	20.0376	19.9775	20.2257	37626.2	319926	92275.9	454949	53322			116		M320T20	y
558		4.04943	2.01772	2.73656	0.110703	0.344419	UP	125.011	125.011	125.011	6.53132	6.44177	6.6103	327557	319836	38158.4	1.29515e+06	616127	[15][M+1]-		12		M125T7_2	n
559		2.77279	1.47134	2.26556	0.111203	0.344756	UP	174.064	174.064	174.064	6.633	6.5766	6.6894	258538	1.0969e+06	1.33519e+06	3.04146e+06	653750			12		M174T7	n
560		2.39644	1.26089	2.54645	0.11125	0.344787	UP	198.075	198.075	198.075	14.8839	14.7378	14.9125	88552.3	264463	62793.8	633770	243220			334		M198T15_2	n
561		1.49622	0.581321	2.0976	0.111392	0.344882	UP	341.923	341.923	341.923	22.5278	22.3395	22.605	4453350	2.75895e+07	6.55129e+06	4.128e+07	9.21274e+06	[144][M]-		32		M342T23_2	n
562		2.02488	1.01784	2.64596	0.111532	0.344976	UP	134.047	134.047	134.047	4.81173	4.73415	4.84382	511407	4.01755e+06	447554	8.13507e+06	2.65792e+06			227		M134T5	y
563		3.66906	1.87541	2.63208	0.111535	0.344978	UP	203.021	203.021	203.021	8.93271	8.91592	8.9495	382871	1.67502e+06	526213	6.14576e+06	2.89454e+06			71		M203T9_2	y
564		8.46907	-3.0822	-2.7325	0.1116	0.345021	DOWN	146.071	146.07	146.072	17.4512	17.2747	17.768	206373	524824	293209	61969.5	10298.3			3		M146T17_3	n
565		153.568	7.26273	2.73453	0.111756	0.345125	UP	324.051	324.051	324.051	8.13574	8.11317	8.15832	25191.6	0	0	121886	77202.4			97		M324T8	y
566		1.48301	0.568526	2.09004	0.111773	0.345136	UP	80.9634	80.9633	80.9635	22.6038	22.4252	22.7347	69704.1	848910	198629	1.25894e+06	275699			16		M81T23	n
567		4.1156	2.0411	2.66403	0.11208	0.34534	UP	475.754	475.753	475.754	6.53293	6.51363	6.62507	76615.8	62518.7	17712.3	257302	125396		[M-2H+K]- 438.793	12		M476T7	n
568		3.95274	-1.98285	-2.60201	0.11228	0.345472	DOWN	101.025	101.024	101.025	17.6932	17.62	17.8692	907311	2.08558e+07	1.01686e+07	5.27629e+06	2.03706e+06		[M-H-CO2]- 146.022	176		M101T18_2	y
569		4.5046	-2.1714	-2.39062	0.112464	0.345594	DOWN	241.109	241.108	241.109	48.4282	48.4202	48.4673	29672.3	169503	89807.4	37364.3	33169.4		[M+Cl]- 206.134	104		M241T48_2	y
570		1.70854	0.772764	2.08631	0.112543	0.345646	UP	936.826	936.826	936.827	1.7088	1.70635	1.72423	119637	326135	111542	557215	156083			5		M937T2	n
571		2.69993	1.43292	2.41019	0.112582	0.345671	UP	273.128	273.128	273.128	6.2395	6.21612	6.26205	15546	25474.5	10349.6	68779.3	29349			42		M273T6	n
572		2.55753	1.35475	2.51337	0.112655	0.345719	UP	196.926	196.926	196.927	22.608	22.5548	22.6763	69216.5	518400	145330	1.32582e+06	537109			16		M197T23_1	n
573		1.188	0.248533	2.53289	0.112971	0.345927	UP	218.067	218.067	218.068	25.9474	25.9088	26.0607	80657.6	737453	23136.2	876093	91939.2			340		M218T26	y
574		1.56981	-0.650591	-2.03436	0.113016	0.345956	DOWN	516.819	516.819	516.82	1.59227	1.57437	1.60672	584893	866309	202060	551855	175638			23		M517T2	n
575		1.94981	0.963332	2.10064	0.113079	0.345997	UP	326.76	326.76	326.761	6.69426	6.58672	6.96403	4.46697e+06	2.83006e+07	1.24316e+07	5.51808e+07	1.83489e+07		[M+2Cl]2- 583.584	43		M327T7	n
576		2.00269	1.00194	2.42329	0.113252	0.34611	UP	346.818	346.817	346.818	6.50922	6.49948	6.6103	161016	463017	105745	927277	314530		[M+Cl]- 311.852	68		M347T7_1	n
577		2.52911	-1.33863	-2.34841	0.113292	0.346136	DOWN	566.626	566.626	566.627	6.88787	6.85775	6.91798	104524	582252	95701.8	230220	241357			14		M567T7_2	n
578		1.17143	-0.228268	-2.07976	0.113534	0.346293	DOWN	435.05	435.049	435.051	20.24	20.1798	20.3692	35842.2	398050	28113.1	339799	39535.7			228		M435T20	y
579		1.84669	0.884945	2.05959	0.114023	0.346609	UP	268.801	268.801	268.802	6.61092	6.57355	6.72855	11996093	8.65932e+07	3.69582e+07	1.59911e+08	4.9354e+07		[2M-2H+K]- 115.919	12		M269T7	n
580		1.72689	0.788178	2.09736	0.114851	0.34714	UP	400.966	400.965	400.967	20.5145	20.422	20.5615	24793.2	112925	37223.9	195009	56652.3			270		M401T21	y
581		3.87732	-1.95506	-2.66487	0.115088	0.347291	DOWN	256.032	256.031	256.032	24.4543	24.3887	24.5108	79173.3	731002	351416	188533	28636.6		[M-H+NaCOOH]- 189.053	103		M256T24_1	y
582		14.2549	-3.83338	-2.66614	0.115561	0.34759	DOWN	286.055	286.055	286.055	24.4267	24.4033	24.4665	19939	116608	70290.1	8180.22	4588.13			66		M286T24	y
583		1.81173	-0.857367	-2.02639	0.115685	0.347668	DOWN	216.032	216.031	216.032	6.23858	6.10058	6.27052	18542.1	117965	35097.6	65111.6	28443.2			42		M216T6	n
584		1.38242	-0.467197	-2.14903	0.116149	0.34796	DOWN	212.921	212.921	212.922	1.59227	1.57437	1.60041	365234	677110	131358	489800	74402.8			23		M213T2	n
585		2.77236	1.47111	2.49878	0.116259	0.348028	UP	595.29	595.289	595.292	6.03752	5.91202	6.12373	36706.8	111353	32729.1	308711	132827	[215][M]-		269		M595T6	y
586		1.4772	-0.562868	-2.39426	0.116734	0.348324	DOWN	262.88	262.88	262.881	16.5629	16.5182	16.7787	85074.7	5.20288e+06	1.15531e+06	3.52212e+06	379025		[M+Cl+NaCOOH]- 159.924 [M-H+NaCOOH]- 195.9	143		M263T17	n
587		2.58354	1.36935	2.23426	0.117015	0.348499	UP	124.971	124.971	124.972	6.60672	6.57188	6.6446	96039.3	232382	120277	600366	258674	[14][M+1]-		12		M125T7_1	n
588		2.67997	1.42222	2.34329	0.117094	0.348548	UP	113.989	113.989	113.989	7.2642	7.14242	7.67073	1.73913e+06	3.25537e+07	1.39269e+07	8.72431e+07	3.79491e+07			25		M114T7	n
589		2.03049	1.02183	2.05987	0.117545	0.348826	UP	602.705	602.704	602.705	7.0066	6.97705	7.19343	31256.3	49817.4	35611	101154	24396.7			94		M603T7	n
590		1.76961	-0.823428	-2.60669	0.117886	0.349034	DOWN	165.019	165.019	165.02	0.265329	0.0857888	0.587493	35770.2	959147	31604.7	542012	275364			90		M165T0	y
591		2.04124	1.02944	1.98018	0.118899	0.34965	UP	827.36	827.359	827.36	1.71483	1.7088	1.72085	101632	116418	73398.1	237636	76517	[263][M+1]2-		5		M827T2_2	n
592		1.50164	-0.58654	-2.21863	0.119467	0.349991	DOWN	116.935	116.935	116.935	13.0996	13.0665	13.3012	141529	1.72253e+06	408501	1.1471e+06	186910			56		M117T13_2	n
593		1.70296	-0.768042	-2.09124	0.119707	0.350134	DOWN	313.892	313.891	313.892	7.04403	6.97705	7.26682	27252.9	78199.4	13810	45919.8	22892.4			94		M314T7_1	n
594		3.19767	1.67702	2.6126	0.119907	0.350253	UP	385.911	385.91	385.911	17.1407	17.0047	17.2523	53524.6	166038	12663.2	530936	241581			183		M386T17_1	n
595		1.39214	-0.477301	-2.38451	0.120071	0.350351	DOWN	919.612	919.611	919.612	5.55452	5.47295	5.55547	19481.7	95572.6	18700.3	68651.7	5717.21	[280][M]-		21		M920T6	n
596		1.82457	0.867553	2.35235	0.120167	0.350408	UP	354.925	354.925	354.926	5.82268	5.70013	5.9998	72829.8	231811	44343.7	422955	133572		[M+Cl]- 319.955	41		M355T6	n
597		2.62991	-1.39501	-2.07727	0.120236	0.350449	DOWN	133.051	133.051	133.051	56.277	56.0757	56.4263	30619.2	446011	121229	169327	196283			386		M133T56_1	y
598		1.26319	-0.337071	-2.14524	0.120237	0.350449	DOWN	225.05	225.049	225.05	21.8341	21.7702	21.974	51113.4	968807	76075	766953	144130			362		M225T22_2	y
599		4.0214	2.0077	2.36296	0.120321	0.350499	UP	103.55	103.55	103.55	5.79772	5.74248	5.85297	10251.9	8123.97	5508.9	32669.7	17127.9			61		M104T6_1	n
600		4.37355	2.1288	2.09384	0.120404	0.350548	UP	606.809	606.809	606.809	5.73598	5.70013	5.8092	26737.5	23990.3	34074.6	104923	57628		[M+Cl]- 571.833 [M-H]- 607.816	61		M607T6	n
601		1.576	0.656268	2.15041	0.121566	0.35123	UP	563.94	563.939	563.941	25.7791	25.7633	25.8235	26635.7	183104	38516.7	288573	75715.6		[M+Cl+NaCOOH]- 460.982 [M-H+NaCOOH]- 496.958	59		M564T26	n
602		2.84789	-1.5099	-2.15972	0.122048	0.35151	DOWN	98.025	98.0248	98.025	17.4387	17.3568	17.5912	4497421	3.98274e+07	1.85829e+07	1.39849e+07	9.17665e+06		[M-H]- 99.0296	3		M98T17	y
603		57.9985	-5.85794	-2.58806	0.12231	0.351661	DOWN	443.067	443.067	443.068	24.3932	24.3743	24.4122	17703.9	70079.3	46430.9	679.164	1176.35			66		M443T24	y
604		106.622	6.73636	2.58268	0.122876	0.351986	UP	603.948	603.948	603.948	7.38753	7.38385	7.3912	44535.7	2978.1	1472.78	317532	210947		[M+Cl+NaCOOH]- 500.991 [M-H+NaCOOH]- 536.967 [M+Cl]- 568.979 [M-H]- 604.956	25		M604T7	n
605		1.935	-0.952336	-1.95033	0.122984	0.352048	DOWN	110.976	110.976	110.976	3.79659	3.67993	3.91325	38420.7	229736	70823.5	118727	68579.3			374		M111T4	y
606		1.36396	-0.4478	-1.97065	0.123013	0.352065	DOWN	433.862	433.861	433.862	1.5941	1.57437	1.60673	50911.6	88718.1	16142.1	65044.6	13129.2	[180][M+1]-		23		M434T2	n
607		2.31945	-1.21378	-1.95095	0.123441	0.352308	DOWN	160.015	160.015	160.015	48.4138	48.405	48.4602	32343.3	151147	51555.6	64900.4	56611.9			104		M160T48	n
608		2.36407	-1.24127	-2.40237	0.123583	0.352389	DOWN	126.214	126.213	126.214	50.7194	50.6398	50.799	491326	3.07888e+06	318619	1.3021e+06	1.24076e+06			11		M126T51	n
609		1.54924	0.631561	2.11578	0.12373	0.352473	UP	184.864	184.864	184.864	6.99387	6.89632	7.15037	315811	4.06017e+06	1.61493e+06	6.29018e+06	851276			94		M185T7_2	n
610		6.28027	2.65083	2.56665	0.123781	0.352501	UP	647.634	647.634	647.634	6.51826	6.51363	6.52288	38756.3	14032.8	1945.84	88130	49965			68		M648T7	n
611		1.58213	0.661872	2.42243	0.124056	0.352657	UP	104.035	104.035	104.036	9.6745	9.63532	9.7213	145877	2.919e+06	1.18312e+06	4.61824e+06	276355			311		M104T10	y
612		2.93409	1.55291	2.00745	0.124193	0.352734	UP	352.849	352.849	352.849	5.55547	5.54407	5.57002	39018.1	164762	155601	483425	226680		[M-H-CO]- 381.852	21		M353T6	y
613		25.0423	4.6463	2.56461	0.124217	0.352747	UP	549.152	549.151	549.153	9.33877	9.11453	9.37728	399965	185221	60137	4.63836e+06	3.0069e+06		[M+Cl+NaCOOH]- 446.195 [M-H+NaCOOH]- 482.172 [M+Cl]- 514.184 [M-H]- 550.16	4		M549T9	y
614		169.241	7.40294	2.559	0.124749	0.353045	UP	373.069	373.069	373.069	9.04611	9.02108	9.07113	28753.6	514.659	891.415	176652	119215			71		M373T9_1	y
615		1.29593	-0.373988	-2.46266	0.125424	0.353421	DOWN	248.96	248.96	248.961	14.7796	14.6346	14.8532	243495	2.17863e+06	61148	1.68113e+06	344518			205		M249T15	n
616		2.22485	1.15371	2.30988	0.125902	0.353685	UP	143.035	143.035	143.035	5.33978	5.3375	5.34207	169007	2.18801e+06	1.9155e+06	4.86799e+06	607633			13		M143T5_2	y
617		1.53521	0.618437	2.26356	0.126362	0.353937	UP	347.06	347.059	347.061	25.7861	25.7497	25.8975	117279	925050	126610	1.42015e+06	357060	[150][M+1]-		59		M347T26	n
618		2.84769	-1.50979	-2.39114	0.12676	0.354154	DOWN	121.03	121.03	121.03	17.5248	17.5142	17.5353	111533	1.90747e+06	872736	669833	205045		[M-H-CO2]- 166.029	3		M121T18	y
619		1.84166	0.881008	2.39529	0.12682	0.354187	UP	89.0247	89.0245	89.0247	24.0322	23.994	24.0583	666483	4.22872e+06	577679	7.78787e+06	2.50798e+06			17		M89T24	y
620		1.49403	-0.579213	-1.92637	0.128245	0.354955	DOWN	518.817	518.817	518.818	1.58149	1.57437	1.59274	137995	212978	48300.3	142552	40947.8			23		M519T2	n
621		1.7818	0.833336	2.49933	0.128661	0.355177	UP	323.983	323.983	323.984	12.0207	11.9931	12.0483	134131	3.58675e+06	1.93931e+06	6.39088e+06	124150			159		M324T12	y
622		1.59299	-0.671738	-1.9896	0.128748	0.355223	DOWN	114.937	114.937	114.937	22.5346	22.5027	22.5665	243655	3.14121e+06	557459	1.9719e+06	851742			32		M115T23_2	n
623		1.34392	-0.426445	-2.35277	0.128926	0.355318	DOWN	131.035	131.035	131.035	17.7745	17.549	17.8692	59339.9	871232	39732.9	648277	159252			51		M131T18	y
624		2.06536	1.04639	2.41848	0.129014	0.355364	UP	792.865	792.864	792.867	1.72085	1.7088	1.779	1.50433e+06	3.84655e+06	523828	7.94452e+06	2.88773e+06			5		M793T2	n
625		6.81429	2.76856	2.33493	0.129319	0.355525	UP	89.0439	89.0438	89.044	18.3727	18.3363	18.4092	347492	1.19425e+06	1.30795e+06	8.13796e+06	4.98202e+06			29		M89T18	n
626		7.38346	2.8843	2.4696	0.129712	0.355732	UP	162.042	162.042	162.043	7.05902	7.017	7.13605	63439.5	73151	33003.8	540107	325832			94		M162T7	y
627		1.41318	0.498949	2.16226	0.130069	0.355919	UP	910.821	910.82	910.821	1.69475	1.66417	1.7094	126591	409706	52300.5	578990	125111			5		M911T2	n
628		2.29252	-1.19694	-1.90182	0.13049	0.356138	DOWN	182.989	182.989	182.989	54.0285	53.8687	54.3152	383266	5.39727e+06	1.8739e+06	2.35403e+06	2.0421e+06			243		M183T54_1	y
629		3.24106	1.69646	2.38834	0.13112	0.356464	UP	343.021	343.02	343.021	23.175	23.0122	23.2732	198970	685036	207112	2.22024e+06	1.09391e+06		[2M-H]- 172.013	33		M343T23_3	y
630		6.79529	2.76453	2.43325	0.13166	0.356742	UP	895.348	895.348	895.348	1.70031	1.69182	1.7088	47153.9	20033.7	10214.4	136135	82010.2			5		M895T2	n
631		1.58591	-0.665307	-1.89352	0.131698	0.356761	DOWN	214.049	214.049	214.049	9.92248	9.86082	9.98413	545749	6.58272e+06	1.63637e+06	4.15076e+06	1.507e+06		[M+Cl]- 179.08 [M-H]- 215.056	31		M214T10	y
632		1.80633	-0.853061	-1.89428	0.13185	0.356839	DOWN	324.094	324.094	324.095	16.3608	16.2649	16.5007	52527.1	909793	248758	503669	275707			361		M324T16	y
633		1.47915	0.56477	1.9062	0.132648	0.357245	UP	310.053	310.052	310.053	16.9284	16.7709	16.9947	90185.8	776570	211601	1.14866e+06	263698		[M+Cl+NaCOOH]- 207.094 [M-H+NaCOOH]- 243.075	93		M310T17_2	y
634		131.43	7.03815	2.46311	0.132752	0.357297	UP	730.975	730.974	730.977	8.09946	8.06998	8.12893	26564.9	642.469	1112.79	153984	107823			86		M731T8	n
635		2.04838	1.03449	1.97089	0.132893	0.357368	UP	440.681	440.68	440.681	6.69912	6.60223	6.97748	619836	3.60439e+06	1.7767e+06	7.38318e+06	2.80561e+06		[M-2H]2- 883.376	43		M441T7	n
636		1.89915	0.925352	2.00779	0.132895	0.357369	UP	200.033	200.033	200.034	5.83108	5.72828	6.07177	44029.1	297660	114849	565300	200292		[M-H-C2H4]- 229.084	41		M200T6	n
637		2.22082	-1.1511	-1.88833	0.134367	0.358105	DOWN	340.892	340.892	340.893	49.1165	49.114	49.1423	32720.4	174998	56584.6	78534	68021.9			34		M341T49	n
638		12.4717	-3.64058	-2.43715	0.134544	0.358192	DOWN	249.953	249.953	249.954	6.4826	6.47117	6.58145	630789	1.70111e+06	1.11084e+06	136398	51206.6		[M+Cl]- 214.984	68		M250T6_1	n
639		2.21724	1.14877	2.35634	0.134725	0.358282	UP	202.072	202.072	202.073	23.9572	23.9022	24.1168	135687	707959	113494	1.56972e+06	623192			20		M202T24	y
640		2.23816	1.16232	1.87956	0.135398	0.358613	UP	868.84	868.84	868.844	1.70031	1.68683	1.72423	207204	443061	325761	991644	386574	[274][M]2-		5		M869T2_1	n
641		1.46516	0.551063	2.32617	0.13545	0.358638	UP	346.057	346.056	346.057	25.802	25.7497	25.8975	1.30731e+06	1.09339e+07	770807	1.60199e+07	3.70777e+06	[150][M]-	[M+Cl]- 311.087 [M-H]- 347.064	59		M346T26	y
642		1.65137	-0.723665	-2.31773	0.136697	0.359243	DOWN	378.091	378.09	378.091	20.0301	20.024	20.0362	33152.3	394528	113965	238909	23159.5			116		M378T20_1	y
643		13.7679	-3.78323	-2.34647	0.137335	0.359549	DOWN	408.897	408.897	408.898	5.89384	5.84765	5.94003	12470.1	56792.8	38770.2	3595.9	6228.27		[M+Cl]- 373.928	41		M409T6	y
644		1.44575	-0.531816	-2.25517	0.137705	0.359726	DOWN	250.145	250.145	250.145	2.22063	2.17338	2.2548	120867	385503	88367.1	266646	22900.6	[76][M]-		211		M250T2_3	y
645		2.07261	1.05145	2.04533	0.137834	0.359787	UP	749.595	749.595	749.596	6.53392	6.52772	6.54993	54913.8	95447.6	37208.6	197825	78306		[M+Cl]- 714.632 [M-H]- 750.606	12		M750T7	n
646		1.90816	0.932185	2.0849	0.138282	0.36	UP	466.843	466.842	466.844	2.09872	2.07098	2.11685	239844	1.19976e+06	355053	2.28935e+06	832641			28		M467T2	n
647		1.46579	-0.551679	-1.88732	0.139048	0.36036	DOWN	366.869	366.868	366.869	1.59337	1.57437	1.60673	213586	381808	90163.1	260479	65336.2			23		M367T2	n
648		3.98744	1.99546	1.88473	0.139541	0.36059	UP	356.923	356.923	356.923	5.73291	5.70013	5.76568	13469	14204.9	23415.5	57696.2	32390.7		[M-H]- 357.935	61		M357T6	y
649		4.68626	2.22844	2.26081	0.139827	0.360723	UP	441.986	441.986	441.986	6.27137	6.26502	6.39667	42110.7	32515.7	20753.2	152377	89452.4			42		M442T6	y
650		4.23009	2.08069	2.36579	0.139956	0.360783	UP	215.054	215.054	215.054	8.9559	8.9495	9.1726	93845.7	292187	57191.3	1.23598e+06	688601			71		M215T9	n
651		2.81638	-1.49384	-1.90253	0.140056	0.36083	DOWN	182.989	182.989	182.989	59.4552	59.229	59.662	180872	2.68084e+06	876925	951609	1.30742e+06			296		M183T59_2	y
652		1.66977	-0.739648	-1.89786	0.140557	0.361061	DOWN	448.832	448.832	448.833	1.58712	1.57437	1.60041	402218	611597	185678	366276	125097			23		M449T2	n
653		2.76998	-1.46988	-1.98057	0.141535	0.361509	DOWN	192.024	192.023	192.024	32.1662	32.1197	32.276	130693	461619	119475	166386	228881			98		M192T32	n
654		13.8064	-3.78726	-2.36473	0.141641	0.361557	DOWN	146.046	146.046	146.046	21.6063	21.5783	21.6655	440987	4.51896e+06	3.0694e+06	327309	68915			236		M146T22_1	y
655		2.66106	1.412	2.32479	0.141733	0.361599	UP	331.236	331.235	331.236	1.58149	1.57437	1.60773	75768.1	56455.8	8778.55	150232	69313.1			23		M331T2_2	y
656		1.82558	0.868354	1.88649	0.142753	0.362059	UP	380.715	380.714	380.715	22.622	22.5665	22.7782	6.88139e+06	1.42758e+08	9.00243e+07	2.60616e+08	6.00413e+07			16		M381T23	n
657		1.80042	0.848335	1.92876	0.143019	0.362178	UP	330.754	330.754	330.755	6.69912	6.56808	6.84702	1.56635e+06	9.38524e+06	3.40032e+06	1.68974e+07	5.82635e+06		[M+Cl]- 295.791	43		M331T7	n
658		1.58355	0.663162	1.82592	0.143736	0.362497	UP	172.941	172.941	172.942	7.02427	6.96173	7.22722	384630	4.4315e+06	1.58947e+06	7.0175e+06	1.86844e+06			94		M173T7_1	n
659		1.83078	0.872455	1.88278	0.1438	0.362526	UP	328.757	328.757	328.758	6.69912	6.58672	6.84702	3.51635e+06	2.38301e+07	1.00335e+07	4.36275e+07	1.51995e+07		[M-H]- 329.765	43		M329T7_1	n
660		2.0396	1.02829	2.1708	0.144248	0.362724	UP	620.551	620.549	620.551	6.75345	6.61982	6.9368	954453	5.23628e+06	1.18864e+06	1.06799e+07	4.1776e+06		[3M-2H+Na]- 199.85 [M+Cl]- 585.587	19		M621T7_1	n
661		1.78626	0.836944	1.91538	0.144792	0.362963	UP	324.763	324.763	324.764	6.69912	6.58517	6.84702	2.47704e+06	1.50233e+07	5.39945e+06	2.68355e+07	9.21646e+06		[M-H+Cl]2- 615.561 [M-2H]2- 651.537	43		M325T7	n
662		1.54102	0.623886	2.23973	0.145307	0.363188	UP	322.045	322.045	322.046	27.041	27.039	27.0455	27730.1	171362	13831	264073	70349.1			89		M322T27	y
663		2.72818	1.44794	2.28	0.145348	0.363206	UP	102.957	102.957	102.957	14.3891	14.3428	14.4354	772537	4.31998e+06	5.61589e+06	1.17857e+07	792108			203		M103T14	n
664		1.73663	0.796289	1.80555	0.145494	0.36327	UP	420.251	420.251	420.252	1.3924	1.35941	1.41827	80783.4	182665	93636.8	317221	88845.1		[M+Cl+HCOOH]- 339.276 [M-H+HCOOH]- 375.253	9		M420T1	y
665		1.43429	-0.520337	-1.80514	0.145846	0.363422	DOWN	600.782	600.782	600.783	6.08555	6.0511	6.08585	49606.4	416084	81910.9	290098	88904.3			196		M601T6_1	n
666		8.52499	3.0917	2.25309	0.14595	0.363467	UP	529.718	529.717	529.718	6.51826	6.51363	6.52288	37929	6879.4	7022.88	60902.2	40931.6			68		M530T7	n
667		5.45958	2.44879	2.23235	0.146449	0.363683	UP	181.977	181.976	181.977	6.42147	6.36193	6.45237	2.11461e+06	1.53606e+06	1.00489e+06	8.38622e+06	5.21909e+06	[45][M+1]-		6		M182T6	n
668		6.26418	-2.64713	-2.30542	0.147161	0.363987	DOWN	345.975	345.974	345.975	17.1903	17.1635	17.3408	240646	4.25333e+06	2.68304e+06	678992	112013		[M+Cl]- 311.005	183		M346T17	y
669		1.74165	0.800458	2.04576	0.147446	0.364109	UP	239.935	239.935	239.935	7.08798	7.05318	7.10005	99117	872647	198991	1.51985e+06	510547	[66][M+1]-		73		M240T7_2	n
670		3.28799	-1.71721	-2.27999	0.14806	0.364369	DOWN	112.96	112.96	112.96	1.70063	1.67758	1.72367	77110000	7.49348e+08	3.65755e+07	2.27904e+08	3.94435e+08			5		M113T2_1	n
671		1.85354	0.890285	1.86813	0.148826	0.364691	UP	195.951	195.951	195.951	22.5986	22.4252	22.7637	64188.1	424149	177619	786177	284811			16		M196T23	n
672		1.81027	0.856205	2.01419	0.149035	0.364779	UP	130.087	130.087	130.088	5.2884	5.24558	5.41165	432186	4.8015e+06	1.27411e+06	8.69202e+06	3.09344e+06	[22][M]-		22		M130T5	y
673		1.73015	0.7909	1.90516	0.149383	0.364924	UP	290.776	290.775	290.776	6.77186	6.74877	6.97748	647583	5.38917e+06	1.73024e+06	9.32409e+06	3.13111e+06			19		M291T7_1	n
674		3.16569	1.66252	1.93293	0.14955	0.364993	UP	128.98	128.98	128.98	5.55917	5.53228	5.58607	29121960	7.11689e+07	1.23046e+08	2.25299e+08	6.27255e+07			21		M129T6_3	n
675		34.132	5.09305	2.28169	0.149652	0.365036	UP	709.588	709.587	709.588	6.51143	6.50922	6.51363	33374.6	687.364	1190.55	41521.4	30974.6			68		M710T7_1	n
676		2.70043	1.43319	1.86195	0.150098	0.365221	UP	855.385	855.384	855.387	6.78243	6.68425	6.79953	86350.8	117344	97797.1	316880	157762			19		M855T7	n
677		2.10434	-1.07337	-2.18809	0.150383	0.365338	DOWN	192.024	192.023	192.024	48.4527	48.4192	48.4673	13741	66619.5	5556.14	31393.6	27324.9	[51][M+1]-		104		M192T48	n
678		6.36343	2.6698	2.11851	0.150423	0.365354	UP	690.773	690.773	690.774	5.71092	5.68587	5.73598	13552.2	8230.11	10237.5	54055.3	36040			262		M691T6_1	n
679		1.92539	-0.945151	-2.20316	0.15081	0.365513	DOWN	310.103	310.102	310.103	20.1217	20.0095	20.2573	92253.7	1.50577e+06	560103	782060	99981		[M+Cl]- 275.134 [M-H]- 311.111	238		M310T20	y
680		3.53689	-1.82248	-1.93358	0.150857	0.365533	DOWN	174.956	174.956	174.957	32.5872	32.2913	32.8888	1.26078e+06	6.23471e+07	3.58809e+07	1.76274e+07	1.78121e+07			127		M175T33_1	n
681		6.24363	2.64238	2.22923	0.151658	0.365859	UP	262.963	262.963	262.963	4.82838	4.82667	4.83008	20081	23723.7	12107.1	148122	95892.8	[83][M+1]-		227		M263T5_2	n
682		1.43587	-0.521925	-1.88019	0.151742	0.365893	DOWN	248.96	248.96	248.961	22.2863	22.2	22.3727	131057	1.86521e+06	257616	1.29901e+06	453529			54		M249T22_3	n
683		2.59165	1.37387	1.95467	0.152044	0.366015	UP	524.687	524.686	524.689	6.97718	6.93172	7.17893	53847.4	107754	63240.7	279260	138190			94		M525T7	n
684		1.85039	0.887831	2.13258	0.15237	0.366147	UP	706.816	706.815	706.817	7.14242	7.09763	7.4125	156638	628856	105188	1.16363e+06	421406	[238][M+2]-		73		M707T7_3	n
685		3.35119	-1.74467	-2.20691	0.152538	0.366214	DOWN	343.113	343.112	343.114	17.4514	17.301	17.72	228976	5.98995e+06	3.2617e+06	1.78741e+06	489915		[M-H]- 344.12	3		M343T17	y
686		48.5035	5.60002	2.25504	0.15281	0.366324	UP	671.936	671.936	671.937	7.3729	7.36893	7.37687	29798.8	4558.68	822.646	221112	166328		[M+Cl+NaCOOH]- 568.979 [M-H+NaCOOH]- 604.956	25		M672T7_2	n
687		1.33392	0.415669	2.07472	0.152928	0.366371	UP	243.013	243.012	243.013	10.0912	9.90113	10.1403	24730.8	285265	75954.2	380521	23554		[M+Cl+NaCOOH]- 140.056 [M-H+NaCOOH]- 176.032	31		M243T10	n
688		1.72965	0.790479	1.98557	0.153465	0.366585	UP	522.915	522.914	522.915	1.69433	1.6939	1.69475	241101	722429	173394	1.24955e+06	425871	[199][M+2]-		5		M523T2	n
689		3.04206	-1.60505	-2.03887	0.153485	0.366593	DOWN	225.062	225.062	225.062	5.37353	5.32797	5.78337	174189	1.8413e+06	992471	605283	342845			22		M225T5_3	y
690		10.6946	-3.4188	-2.24423	0.153673	0.366668	DOWN	99.05	99.0496	99.0505	17.4434	17.4392	17.4477	432157	1.28534e+06	898718	120186	30672.4			3		M99T17	n
691		2.63818	-1.39955	-2.15901	0.153688	0.366674	DOWN	178.051	178.051	178.051	6.0648	5.93273	6.19427	158243	855583	417650	324308	85004.2			306		M178T6_2	y
692		1.68493	0.75269	1.81196	0.154518	0.367002	UP	272.795	272.795	272.796	6.69912	6.58517	6.80148	2.62312e+06	1.81602e+07	6.61661e+06	3.05987e+07	9.87881e+06		[M+Cl]- 237.828	43		M273T7	n
693		2.1146	1.08039	1.96674	0.15476	0.367097	UP	678.727	678.727	678.728	7.0581	6.99227	7.26682	81448.1	161934	61384.9	342427	146624			94		M679T7_2	n
694		1.6233	-0.698932	-1.91707	0.154766	0.367099	DOWN	178.949	178.949	178.949	29.4267	29.3673	29.533	93993.4	4.64824e+06	700908	2.86344e+06	1.45225e+06		[2M-3H]3- 269.943	63		M179T29	n
695		1.46174	0.547691	1.83005	0.155289	0.367304	UP	414.044	414.044	414.045	25.7717	25.7633	25.9125	149376	1.46826e+06	545520	2.14622e+06	337832	[177][M]-	[M+Cl+NaCOOH]- 311.087 [M-H+NaCOOH]- 347.064 [M+Cl]- 379.075 [M-H]- 415.052	59		M414T26	y
696		1.76655	0.820935	1.91552	0.156256	0.367679	UP	398.856	398.855	398.856	2.09872	2.08132	2.11685	413117	1.91258e+06	564967	3.37867e+06	1.19925e+06			28		M399T2_1	n
697		2.17101	1.11837	2.01556	0.156295	0.367695	UP	416.802	416.802	416.803	7.0099	6.91743	7.19343	166218	517103	170919	1.12263e+06	491486			94		M417T7	n
698		2.03183	1.02278	2.21145	0.156799	0.367889	UP	624.544	624.543	624.545	6.72364	6.66187	6.89097	230796	1.17863e+06	51389.3	2.39478e+06	951125		[M+Cl]- 589.578	43		M625T7	n
699		2.60246	-1.37988	-1.96217	0.156868	0.367915	DOWN	111.009	111.009	111.009	32.1526	31.8547	32.276	134772	562732	115144	215966	283616			96		M111T32	y
700		1.23316	-0.302357	-1.78656	0.157878	0.3683	DOWN	158.979	158.979	158.979	29.6553	29.588	29.7227	124496	1.38893e+06	143778	1.12632e+06	210114			239		M159T30_2	n
701		1.62152	-0.697347	-1.8075	0.157914	0.368314	DOWN	785.684	785.684	785.685	5.5052	5.45523	5.55517	31827.9	177933	34976.1	109732	55206.9	[255][M+1]-		21		M786T6	n
702		1.70645	0.770999	2.18997	0.157961	0.368332	UP	83.0253	83.0252	83.0254	7.06475	6.98118	7.17893	1.05635e+06	4.84675e+06	239471	8.27074e+06	2.69743e+06			94		M83T7_2	y
703		2.81248	-1.49184	-1.8202	0.15811	0.368389	DOWN	191.02	191.02	191.02	32.1197	31.8357	32.276	1.97356e+06	7.50787e+06	2.38285e+06	2.66922e+06	3.93977e+06			96		M191T32	y
704		2.83986	1.50582	2.1297	0.158346	0.368478	UP	725.377	725.377	725.378	1.7088	1.69182	1.72423	135357	166082	46305.6	471650	244162	[241][M+1]2-		5		M725T2_2	n
705		2.44493	1.28979	1.89082	0.158499	0.368535	UP	514.659	514.658	514.659	6.94967	6.85775	7.15037	61652.7	190012	109699	464566	226315		[M-2H+K]- 477.698	147		M515T7	n
706		1.47139	0.557176	2.06531	0.158588	0.368569	UP	133.014	133.014	133.014	23.5053	23.4772	23.5072	175989	1.64552e+06	169166	2.42119e+06	628130		[M+Cl]- 98.0417	45		M133T24_4	y
707		2.4031	-1.2649	-1.73038	0.158707	0.368614	DOWN	188.906	188.905	188.906	53.984	53.7672	54.3165	214323	3.57358e+06	1.44977e+06	1.4868e+06	1.50372e+06			243		M189T54_1	n
708		4.05903	2.02113	2.1309	0.159642	0.368964	UP	533.712	533.711	533.712	6.54295	6.51363	6.56403	66901.1	57717.7	24338.8	234278	141434		[M-2H+K]- 496.751	12		M534T7	n
709		2.08883	1.0627	1.88725	0.16	0.369097	UP	772.807	772.807	772.809	7.1511	7.09763	7.3979	199191	583890	250751	1.21965e+06	526848			73		M773T7	n
710		6.25346	2.64465	2.18803	0.160081	0.369127	UP	305.045	305.045	305.045	22.4692	22.3763	22.5622	124620	161471	11514.7	1.00975e+06	671404			206		M305T22	y
711		1.3961	-0.481397	-1.78993	0.160148	0.369152	DOWN	160.062	160.062	160.062	22.4097	22.2587	22.4487	191208	2.62902e+06	606961	1.88313e+06	390590			24		M160T22	y
712		3.02024	1.59466	1.85269	0.160702	0.369357	UP	708.595	708.595	708.597	7.0028	6.91743	7.22208	35455.7	33009.1	29129	100494	55964.2			94		M709T7_1	n
713		1.53669	-0.61983	-1.72019	0.161353	0.369596	DOWN	161.046	161.046	161.046	5.33273	5.32797	5.3375	74812.8	805179	189070	523968	210776			13		M161T5	y
714		2.67893	-1.42166	-1.74967	0.161453	0.369632	DOWN	422.089	422.088	422.089	33.5105	33.4323	33.5533	10630.6	45192.1	16752.8	16604.9	22807.8			410		M422T34	y
715		2.18691	1.12889	1.89199	0.162007	0.369834	UP	758.872	758.871	758.873	1.72342	1.70635	1.89707	454556	820751	366847	1.79491e+06	812861	[249][M]-		5		M759T2	n
716		2.10647	-1.07483	-1.74711	0.162384	0.369971	DOWN	98.7091	98.709	98.7093	49.4255	49.412	49.4255	198072	672322	205807	318905	283554		[M+Cl]- 63.7431	2		M99T49_1	n
717		1.47349	-0.559237	-2.14247	0.162419	0.369984	DOWN	368.066	368.065	368.066	20.236	20.222	20.412	21143.1	163293	4630.66	110821	42167.2	[157][M+1]-		228		M368T20	n
718		1.32978	0.411191	1.83041	0.162437	0.36999	UP	172.098	172.098	172.098	19.5533	19.5102	19.7135	922439	9.27168e+06	2.54675e+06	1.23293e+07	1.37313e+06			172		M172T20_2	y
719		2.08462	-1.05979	-2.13139	0.162968	0.370182	DOWN	269.076	269.075	269.076	20.8463	20.747	21.0943	59337.7	782336	328294	375289	40502.7		[M+Cl]- 234.107 [M-H]- 270.083	285		M269T21	y
720		5.99488	2.58373	2.03822	0.163802	0.370481	UP	288.084	288.084	288.084	5.34847	5.34477	5.35218	20051.1	9443.5	10157.6	58198.8	40167			13		M288T5	y
721		1.86266	0.897365	1.70707	0.164014	0.370556	UP	72.9932	72.9931	72.9933	1.45091	1.25962	1.49028	346796	1.94708e+06	1.27482e+06	3.62675e+06	1.13107e+06			7		M73T1	y
722		4.52242	2.1771	2.0668	0.164157	0.370607	UP	191.02	191.02	191.02	5.16654	5.16535	5.16773	52526	56687.8	34630.6	256366	163715			80		M191T5_2	y
723		1.77897	0.831042	2.08864	0.164203	0.370623	UP	115.004	115.004	115.004	1.44905	1.4329	1.46787	193991	113410	12938.1	201754	72109.1			7		M115T1	y
724		2.26214	1.17769	1.7138	0.164284	0.370652	UP	650.636	650.635	650.637	6.98427	6.94663	7.19343	44579.1	64979.5	52764.7	146993	63922.2			94		M651T7_2	n
725		2.94766	1.55957	1.75755	0.164348	0.370675	UP	861.355	861.353	861.356	1.71483	1.7088	1.72085	54470.5	57043.2	60567.5	168144	91210.4	[272][M+1]2-		5		M861T2_2	n
726		2.28033	-1.18924	-1.88994	0.16468	0.370793	DOWN	719.109	719.108	719.109	32.977	32.9338	33.0202	9135.93	41850.9	8611.03	18088.4	20002.5			292		M719T33	n
727		1.37757	0.46213	1.9871	0.165276	0.371002	UP	113.989	113.989	113.989	1.67882	1.6499	1.70465	3.05748e+06	2.24981e+07	2.14673e+06	3.09928e+07	7.08636e+06	[6][M+1]-		5		M114T2_2	n
728		2.90664	1.53935	1.81491	0.165297	0.37101	UP	396.004	396.004	396.005	5.77622	5.75625	5.79618	12881.6	25784.5	22170.6	74946.3	41348.4			61		M396T6	y
729		1.50482	-0.589587	-1.86522	0.165361	0.371032	DOWN	308.916	308.916	308.916	8.67664	8.6585	8.69478	38275.3	403681	52407.8	268259	114312			15		M309T9	n
730		2.1678	1.11623	2.08302	0.165411	0.37105	UP	706.755	706.754	706.756	6.52791	6.51363	6.62507	87328.3	99975.3	16561.8	216727	95657		[M-2H+K]- 669.795	12		M707T7_2	n
731		5.24566	-2.39113	-2.02731	0.165594	0.371114	DOWN	229.047	229.047	229.047	30.7013	30.6863	30.754	20773.1	166116	111673	31402.7	27852.1			396		M229T31	n
732		1.75044	0.807719	1.84936	0.165605	0.371118	UP	382.722	382.722	382.723	6.69912	6.59363	6.84702	1.00868e+06	6.15964e+06	1.8706e+06	1.07821e+07	3.90425e+06			43		M383T7	n
733		22.5703	4.49635	2.13688	0.165611	0.37112	UP	160.044	160.044	160.044	5.31398	5.31247	5.31548	16895.2	1825.14	1588.79	47165.1	36716.1			22		M160T5_2	y
734		3.99389	1.99779	1.96204	0.165689	0.371147	UP	812.705	812.704	812.706	7.07168	7.02257	7.29592	59729.9	59080.8	48957.2	235962	148274		[M-H-CH3]- 828.748	73		M813T7_1	n
735		2.03113	1.02228	1.92679	0.165848	0.371203	UP	512.878	512.878	512.879	7.1511	7.09763	7.3979	363867	1.77745e+06	575360	3.61023e+06	1.54381e+06		[M-H]- 513.881	73		M513T7_2	n
736		1.48637	0.571796	1.71565	0.165998	0.371255	UP	98.007	98.007	98.007	5.82082	5.7707	5.87093	46728.3	311577	93389.2	463120	121181			41		M98T6	y
737		2.0307	-1.02198	-1.79982	0.166028	0.371266	DOWN	158.979	158.979	158.979	32.3897	32.2913	32.5377	45409	808412	191700	397830	345504			366		M159T32_1	n
738		1.99844	0.998873	1.89163	0.166498	0.371429	UP	928.839	928.838	928.839	1.70738	1.6939	1.72085	420986	1.03522e+06	360859	2.06882e+06	874912			5		M929T2	n
739		1.19989	0.262906	1.68917	0.166789	0.37153	UP	679.11	679.11	679.111	21.3538	21.2707	21.4008	29193.5	359225	50252.7	431032	53814.3		[2M-2H+Na]- 329.067 [M-2H+Na]- 658.134	65		M679T21	n
740		1.22003	0.286916	1.95024	0.167187	0.371668	UP	343.977	343.977	343.978	1.25865	1.24051	1.33336	266618	3.97517e+06	244613	4.84982e+06	737277		[M+Cl]- 309.012	9		M344T1_1	n
741		3.07432	1.62027	1.89953	0.167449	0.371758	UP	522.847	522.847	522.848	5.8092	5.68587	5.90678	34468.1	48697.7	33755.8	149712	85699.7		[M-H]- 523.855	41		M523T6_1	n
742		1.75159	0.808669	2.06769	0.167456	0.37176	UP	162.913	162.912	162.913	6.93895	6.903	7.07445	349403	3.199e+06	340877	5.60336e+06	1.98501e+06		[M+Cl]- 127.939	147		M163T7_3	y
743		2.37866	1.25015	1.91645	0.167747	0.37186	UP	151.076	151.076	151.076	6.58218	6.57188	6.59247	46159.6	45945.3	19843.2	109288	53698.9		[M-H]- 152.086	12		M151T7_2	y
744		7.15914	2.83979	2.11244	0.168814	0.372224	UP	230.039	230.039	230.04	9.30258	9.26383	9.57572	92995.6	186008	27071.3	1.33166e+06	938960		[M-H-CH3]- 246.069	4		M230T9	y
745		3.03232	-1.60042	-1.91905	0.16903	0.372297	DOWN	133.036	133.035	133.036	23.9718	23.9578	23.9858	32040230	1.63057e+08	3.30135e+07	5.3773e+07	9.29459e+07			20		M133T24_5	n
746		1.83979	0.87954	1.91347	0.169041	0.372301	UP	556.599	556.598	556.599	6.66356	6.62865	6.90527	231571	1.49361e+06	386698	2.74793e+06	1.06751e+06			12		M557T7	n
747		1.6237	0.699286	2.08816	0.169053	0.372305	UP	538.074	538.074	538.074	1.72226	1.72085	1.72367	25354.5	76982	4314.93	124996	39591.2			5		M538T2_3	n
748		3.08453	-1.62505	-1.70453	0.169668	0.372513	DOWN	258.154	258.153	258.154	3.53353	3.443	3.5934	22576.6	150068	61512.3	48122.7	83351			70		M258T4	n
749		1.07791	0.108242	1.69405	0.170052	0.372641	UP	334.758	334.758	334.759	0.571375	0.464595	0.85465	27488.9	265459	16736.2	286142	12926.4			218		M335T1	n
750		1.96414	0.973896	2.06699	0.170741	0.372871	UP	398.742	398.742	398.742	6.91842	6.84275	7.06428	73113.2	457370	46245.6	898337	366608			14		M399T7	n
751		3.54349	-1.82517	-1.8738	0.171142	0.373004	DOWN	97.0297	97.0295	97.0298	48.4527	48.4527	48.4897	31022.3	288019	177893	81016.5	70472.3		[M-2H]2- 196.076	104		M97T48	y
752		1.70813	-0.772417	-1.873	0.171322	0.373064	DOWN	262.88	262.88	262.881	9.79506	9.78377	9.80635	86278.4	1.9318e+06	688643	1.13095e+06	272477			278		M263T10_2	n
753		1.41001	-0.495709	-1.70367	0.171434	0.373101	DOWN	364.871	364.87	364.871	1.59508	1.58926	1.60672	1184040	2.06232e+06	497370	1.46263e+06	352620			23		M365T2	y
754		2.65354	-1.40792	-1.69147	0.171914	0.373259	DOWN	259.005	259.004	259.005	55.0282	54.8108	55.0987	60342.6	1.17467e+06	601785	442418	447313			141		M259T55	y
755		2.03416	1.02443	1.75616	0.172501	0.373452	UP	146.028	146.028	146.028	5.76154	5.72095	5.80213	11368.8	41172.7	20713.9	83752.1	36530.7			61		M146T6	y
756		5.02579	2.32935	2.07318	0.1727	0.373517	UP	391.017	391.017	391.017	24.2017	24.183	24.2165	42362.4	64792.1	14973.9	325632	217405			102		M391T24_1	y
757		1.66656	-0.736876	-1.67138	0.172825	0.373557	DOWN	265.951	265.951	265.951	4.47308	4.34095	4.57608	116977	854713	224002	512860	274455			100		M266T4	n
758		10.0304	3.3263	2.04189	0.172964	0.373602	UP	591.673	591.67	591.673	6.60465	6.51363	6.63993	53030.1	13225	14549.4	135305	102528		[M+Cl]- 556.709	12		M592T7_2	n
759		1.65095	-0.723299	-1.70961	0.173329	0.373721	DOWN	254.818	254.817	254.818	23.2952	23.269	23.3595	415269	8.29018e+06	2.76139e+06	5.02145e+06	1.82803e+06			30		M255T23_1	n
760		8.54119	-3.09444	-2.03797	0.173841	0.373887	DOWN	328.941	328.941	328.942	51.4155	51.4057	51.5643	1.83887e+06	1.03693e+07	7.70982e+06	1.21377e+06	1.05162e+06			95		M329T51_2	y
761		2.71962	1.4434	1.99104	0.174263	0.374023	UP	656.671	656.67	656.672	7.0118	6.94663	7.20757	96699.8	139847	43106.5	380329	204713			94		M657T7_1	n
762		2.09794	1.06897	1.92181	0.174297	0.374033	UP	396.745	396.745	396.745	6.60877	6.54295	6.64677	123639	333354	96423.4	699355	315455			12		M397T7_1	n
763		1.80947	0.855569	1.93975	0.174567	0.37412	UP	662.104	662.104	662.106	26.3748	26.0487	26.536	654027	5.40554e+06	1.05133e+06	9.78118e+06	3.763e+06	[230][M]-	[M+Cl]- 627.135 [M-H]- 663.112	214		M662T26	y
764		1.39944	-0.484852	-1.80381	0.174824	0.374202	DOWN	816.825	816.824	816.826	1.65666	1.65018	1.66315	152774	460466	53068.9	329035	114502			5		M817T2	n
765		1.9392	0.955463	1.88295	0.175857	0.374531	UP	620.295	620.295	620.297	5.8557	5.84443	6.0367	40655.5	138606	38894	268785	113254			41		M620T6	y
766		2.04524	1.03227	2.02001	0.175879	0.374538	UP	454.703	454.703	454.704	6.91137	6.84275	7.10713	192833	1.12712e+06	141518	2.30523e+06	1.00021e+06		[3M-H]- 151.897	14		M455T7	n
767		2.29341	1.19749	1.89469	0.176073	0.374599	UP	690.883	690.883	690.883	1.70635	1.6939	1.72423	320456	629229	230528	1.44308e+06	707374			5		M691T2_2	n
768		1.93472	0.952125	1.7232	0.176165	0.374628	UP	180.973	180.973	180.974	8.60002	8.3057	8.76023	2.71359e+06	1.90698e+07	9.14191e+06	3.68948e+07	1.54086e+07			84		M181T9	n
769		1.52969	0.613236	1.97208	0.176347	0.374686	UP	248.033	248.033	248.033	5.67625	5.61357	5.89388	21426.1	123583	12164	189044	56191.7			262		M248T6	y
770		2.9625	1.56682	1.9721	0.176813	0.374832	UP	568.625	568.624	568.625	6.97117	6.85775	7.16477	75814.3	134440	47930.5	398279	226712			94		M569T7_1	n
771		6.32016	2.65996	1.87529	0.177082	0.374916	UP	440.884	440.884	440.884	5.71829	5.68587	5.75072	12804.5	7293.54	12632.8	49440.5	36820.9			262		M441T6_1	n
772		2.6845	-1.42466	-1.70428	0.177153	0.374938	DOWN	174.956	174.956	174.957	45.4033	45.2115	45.5848	851589	1.98971e+07	6.72043e+06	7.41158e+06	1.07632e+07			193		M175T45_2	y
773		1.54462	0.627255	1.64851	0.177303	0.374985	UP	172.098	172.098	172.098	5.30463	5.02682	5.37795	1.14298e+06	1.32993e+07	4.82722e+06	2.05424e+07	5.88324e+06			22		M172T5	y
774		1.87445	0.906464	2.02066	0.177313	0.374988	UP	232.897	232.897	232.897	6.97467	6.903	7.017	130434	1.12544e+06	98045.1	2.10957e+06	837856			94		M233T7	n
775		4.99848	2.32149	2.04211	0.177347	0.374999	UP	144.046	144.045	144.046	2.21327	2.1481	2.2498	128513	64706.5	10154.7	323434	219209			211		M144T2	y
776		1.61532	-0.691822	-1.63435	0.177716	0.375114	DOWN	92.9281	92.928	92.9282	8.04838	8.03167	8.06508	257304	558263	155159	345605	163455			86		M93T8	n
777		1.98851	-0.99169	-1.95006	0.177946	0.375185	DOWN	257.14	257.14	257.14	48.4206	48.4192	48.475	12050.4	57470.3	5796.32	28636.6	24945.6	[79][M+3]-		104		M257T48_1	n
778		1.92537	0.945133	1.83246	0.17832	0.375301	UP	450.946	450.946	450.946	1.71483	1.7088	1.72085	17721.6	32058.3	10214.6	61724	26113.5			5		M451T2	n
779		1.46202	0.54796	1.93732	0.179069	0.375531	UP	250.965	250.965	250.965	1.70926	1.67758	1.7218	458122	2.62886e+06	253027	3.84343e+06	1.056e+06	[71][M+2]-		5		M251T2_1	n
780		1.70754	0.771917	1.78211	0.179234	0.375582	UP	215.052	215.052	215.053	10.6603	10.5825	10.8365	85731.7	1.2291e+06	351432	2.09874e+06	768681	[62][M+1]-		99		M215T11	n
781		1.99694	-0.997792	-1.69331	0.179323	0.375609	DOWN	189.901	189.901	189.901	49.1735	48.8852	49.1997	58384.5	836041	226043	418396	362498			34		M190T49	n
782		2.06033	-1.04288	-1.84944	0.179517	0.375669	DOWN	645.818	645.818	645.819	50.7193	50.6917	50.9422	239961	4.05248e+06	657243	1.96665e+06	1.83956e+06			11		M646T51	n
783		1.63597	0.710142	1.7457	0.179646	0.375708	UP	230.9	230.9	230.901	6.56217	6.51363	6.6103	406297	1.94684e+06	560974	3.18496e+06	1.09287e+06			12		M231T7_2	n
784		1.85531	0.891661	1.71783	0.179894	0.375783	UP	198.054	198.054	198.054	15.0642	14.9397	15.1447	77590.8	664173	281002	1.23225e+06	499112			124		M198T15_1	y
785		1.12159	0.16555	1.71089	0.180049	0.375831	UP	372.936	372.936	372.937	15.3325	15.2605	15.4044	444146	3.98988e+06	244985	4.47503e+06	425683			235		M373T15	n
786		2.98643	1.57842	1.76739	0.180111	0.37585	UP	276.8	276.799	276.8	5.28611	5.21112	5.37795	9585434	5.43998e+07	4.52435e+07	1.62461e+08	9.57496e+07			22		M277T5	n
787		1.99049	-0.993122	-1.70116	0.180193	0.375874	DOWN	254.104	254.103	254.104	48.5703	48.554	48.5943	15907.1	88420.6	23039.5	44157	38733.1	[78][M+2]-		91		M254T49	n
788		1.40249	0.487994	1.82029	0.180482	0.375962	UP	482.032	482.031	482.032	25.7958	25.7647	25.9272	51822.4	477113	66356.6	669148	170251		[M+Cl+NaCOOH]- 379.075 [M-H+NaCOOH]- 415.052	59		M482T26	y
789		1.61515	0.691668	1.90434	0.180577	0.375991	UP	385.94	385.939	385.94	1.70857	1.69182	1.71985	856399	3.69404e+06	542779	5.96643e+06	1.99425e+06	[169][M+1]-		5		M386T2_2	n
790		1.71552	0.778644	1.63303	0.180955	0.376105	UP	133.046	133.046	133.052	6.82867	6.77883	7.0176	89678.1	378985	180649	650155	223801		[M+Cl]- 98.0782	14		M133T7_3	n
791		2.00498	1.00359	1.99444	0.181571	0.37629	UP	103.147	103.147	103.147	5.82353	5.68587	5.92128	63206.8	141411	12732.4	283525	122759			41		M103T6_4	n
792		1.65542	0.727196	1.89566	0.181784	0.376354	UP	321.074	321.074	321.074	9.73978	9.69565	9.78392	35639.2	241163	38055.8	399226	139317		[M+Cl+NaCOOH]- 218.117 [M-H+NaCOOH]- 254.094	278		M321T10	y
793		2.11774	1.08252	1.782	0.181843	0.376371	UP	470.766	470.766	470.768	6.99572	6.91743	7.19343	141411	455845	197234	965360	454263			94		M471T7_1	n
794		2.0816	1.0577	1.79879	0.181967	0.376408	UP	578.653	578.653	578.655	6.98427	6.8879	7.19343	79282.6	172441	67847.6	358953	166284			94		M579T7_1	n
795		2.89578	1.53395	1.99655	0.182977	0.376708	UP	366.869	366.868	366.875	6.23858	5.99332	6.4935	132928	241504	24877.7	699342	396405			42		M367T6_2	n
796		2.17571	-1.12149	-1.98741	0.183483	0.376857	DOWN	748.598	748.596	748.598	6.5766	6.53293	6.66197	38494.1	73633.1	34557.8	33843.3	2877.58		[M+Cl]- 713.634 [M-H]- 749.608	12		M749T7	n
797		2.46451	-1.3013	-1.84479	0.183568	0.376883	DOWN	182.989	182.989	182.989	55.9357	55.6038	56.1763	281201	4.39853e+06	766224	1.78448e+06	2.33162e+06			263		M183T56	y
798		1088.43	-10.088	-1.99935	0.183591	0.376889	DOWN	100.931	100.931	100.932	49.4255	49.4255	49.4392	65467412	3.24573e+08	2.80921e+08	297938	387314		[2M-2H+K]- 31.9874	2		M101T49_4	n
799		1149.13	-10.1663	-1.99885	0.183659	0.376909	DOWN	100.913	100.913	100.913	49.4188	49.341	49.4933	65467412	3.74296e+08	3.24053e+08	325457	282217		[2M-2H+K]- 31.9874	2		M101T49_3	n
800		1.68312	0.751139	1.64296	0.183772	0.376943	UP	158.97	158.97	158.971	5.81287	5.63958	5.97927	147536	2.35946e+06	978120	3.97126e+06	1.38944e+06		[M-2H]2- 319.955	41		M159T6	n
801		1.84622	0.884578	1.833	0.185191	0.377356	UP	317.952	317.952	317.952	7.29578	7.23385	7.60467	577994	7.74656e+06	1.9471e+06	1.43019e+07	5.88035e+06	[130][M+1]-		25		M318T7	n
802		1.97497	0.981834	1.80252	0.185839	0.377543	UP	344.821	344.82	344.821	6.98697	6.8879	7.16477	299943	1.63717e+06	531237	3.23337e+06	1.43886e+06			94		M345T7	n
803		2.11702	-1.08203	-1.61382	0.186277	0.377669	DOWN	827.662	827.661	827.663	5.58198	5.5383	5.62567	23231.1	156737	70167.3	74036.8	54357.7		[M-H-CH2]- 842.669	21		M828T6_1	n
804		1.56456	0.645759	1.76609	0.186334	0.377685	UP	540.054	540.054	540.054	26.3337	26.3283	26.4555	242895	2.72539e+06	583348	4.26405e+06	1.39169e+06	[206][M]-		214		M540T26	y
805		1.94382	0.958892	1.7779	0.186458	0.377721	UP	283.912	283.912	283.913	24.0269	24.0022	24.048	28716.3	71584.2	24453.8	139147	61108.8	[98][M+1]-		17		M284T24	n
806		1.9937	-0.995451	-1.86808	0.186548	0.377747	DOWN	127.051	127.051	127.051	50.6507	50.5565	50.732	5.56132e+06	1.311e+07	1.57035e+06	6.57544e+06	5.85169e+06			11		M127T51_2	y
807		4.25304	2.08849	1.89751	0.186881	0.377842	UP	249.055	249.055	249.056	5.21112	5.20557	5.3375	45994.7	46367	29583.1	197201	134466			80		M249T5_3	y
808		2.9129	1.54245	1.84249	0.187032	0.377885	UP	137.025	137.024	137.025	4.76205	4.61967	4.82497	44850.4	147125	76308.9	428559	253321			227		M137T5	y
809		1.62206	0.697828	1.94416	0.187217	0.377938	UP	110.899	110.899	110.899	6.59363	6.52772	6.78292	130974	638396	45193	1.03552e+06	350896			12		M111T7_1	n
810		7.37231	2.88212	1.96239	0.187839	0.378114	UP	241.073	241.073	241.073	3.08059	3.04765	3.11353	15660.6	11580.8	3836.18	85376.8	65021.2			44		M241T3	y
811		1.70715	0.771591	1.82293	0.188046	0.378172	UP	248.961	248.96	248.961	7.29578	7.23385	7.48752	13854066	2.33957e+08	4.7981e+07	3.99399e+08	1.49694e+08	[72][M]-	[M-H+NaCOOH]- 181.978	25		M249T7	n
812		29.0301	4.85948	1.96426	0.188256	0.378231	UP	348.088	348.088	348.088	19.1228	19.1152	19.1305	50426.6	16571.1	11469.8	481062	409420			226		M348T19	y
813		2.94424	1.5579	1.93029	0.18846	0.378289	UP	98.9358	98.9358	98.9358	28.4163	28.3643	28.4683	5.82876e+06	1.17017e+07	2.02152e+07	3.44527e+07	2.84563e+06			58		M99T28	n
814		3.37451	1.75468	1.62702	0.188516	0.378304	UP	194.893	194.892	194.893	22.3612	22.3155	22.407	17972298	6.1994e+07	8.82028e+07	2.09199e+08	1.29529e+08			24		M195T22	n
815		1.89701	0.923731	1.64254	0.189041	0.378451	UP	429.081	429.081	429.082	5.23207	5.1822	5.42768	30792.2	53041.8	26698.7	100621	42478.4			22		M429T5	y
816		2.03976	1.0284	1.88471	0.189308	0.378526	UP	240.929	240.929	240.929	7.09402	7.05318	7.32473	1.11573e+06	8.98123e+06	1.80331e+06	1.83196e+07	8.39037e+06	[66][M+2]-		73		M241T7_1	n
817		1.2363	0.306034	1.57994	0.189443	0.378564	UP	808.838	808.838	808.84	1.99473	1.95323	2.02843	377203	2.05369e+06	366808	2.53898e+06	385353			213		M809T2_2	n
818		1.90027	0.926206	1.69388	0.189991	0.378716	UP	332.752	332.751	332.752	6.6894	6.58672	6.99088	304019	1.84854e+06	769076	3.51273e+06	1.51798e+06		[M-2H+K]- 295.791	43		M333T7	n
819		15.174	3.92353	1.95306	0.190012	0.378722	UP	405.032	405.032	405.032	10.1636	10.1195	10.2077	69867.2	44530.9	6186.12	675711	559721		[M+Cl+NaCOOH]- 302.076 [M-H+NaCOOH]- 338.052	31		M405T10	y
820		1.69467	0.761004	1.77745	0.19013	0.378754	UP	472.921	472.92	472.921	6.53794	6.51363	6.62507	237554	500628	117363	848398	317916		[M-2H+K]- 435.96	12		M473T7_2	y
821		15.8947	3.99047	1.94749	0.190484	0.378852	UP	337.045	337.044	337.045	10.1872	10.1195	10.4522	923363	474456	235370	7.54134e+06	6.28071e+06	[140][M]-	[M+Cl]- 302.076 [M-H]- 338.052	31		M337T10	y
822		2.15379	1.10687	1.66945	0.190531	0.378865	UP	580.65	580.649	580.651	6.98118	6.91743	7.17893	90640.3	220898	127248	475767	231794			94		M581T7_1	n
823		12.1063	3.59769	1.94798	0.19074	0.378923	UP	360.072	360.072	360.072	12.8679	12.8378	12.8979	406653	390179	41829.5	4.72363e+06	3.85287e+06			242		M360T13	y
824		1.62306	0.698718	1.61788	0.190898	0.378966	UP	882.365	882.364	882.365	6.73832	6.68568	6.74877	80394.7	210800	116599	342141	78585.9		[M-H]- 883.376	43		M882T7	n
825		3.76831	1.91392	1.90869	0.191365	0.379094	UP	196.843	196.843	196.843	6.82355	6.63765	6.90988	418595	1.45836e+06	525730	5.49554e+06	3.62564e+06			110		M197T7_1	n
826		1.91305	-0.935872	-1.57089	0.191646	0.379171	DOWN	401.926	401.926	401.927	4.49348	4.37488	4.59125	125138	805752	310122	421188	289164			100		M402T4	y
827		2.45679	1.29677	1.85723	0.191844	0.379225	UP	754.771	754.771	754.772	2.05218	2.00508	2.0739	36786.7	87950.1	27136.1	216075	116367			28		M755T2	n
828		1.1949	0.256886	1.6131	0.193362	0.379636	UP	187.109	187.109	187.109	1.54063	1.51101	1.55417	133410	535033	93748	639309	61217.1			113		M187T2	y
829		1.6091	0.686253	1.64849	0.193655	0.379715	UP	194.947	194.946	194.947	22.6058	22.4252	22.7202	17972298	2.096e+08	6.55768e+07	3.37267e+08	1.17017e+08			16		M195T23_1	n
830		1.43041	0.516425	1.57225	0.193658	0.379716	UP	543.122	543.121	543.123	25.7925	25.7792	25.8252	23842.1	145749	43854.5	208480	53409.9			59		M543T26	y
831		2.04485	1.03199	1.73658	0.193723	0.379733	UP	504.847	504.846	504.847	7.10235	7.0683	7.32473	54986.5	179066	69423.1	366164	173215	[197][M+4]-		73		M505T7_2	n
832		1.87867	-0.909708	-1.57586	0.193817	0.379758	DOWN	242.065	242.065	242.065	9.84966	9.63532	10.1562	201245	8.91817e+06	3.59144e+06	4.74708e+06	2.84943e+06			31		M242T10	y
833		10.2532	3.35801	1.92242	0.19385	0.379767	UP	412.998	412.998	412.999	24.2165	24.2017	24.2313	34413.9	18378.6	7647.36	188440	153030			102		M413T24	y
834		1.93642	-0.95339	-1.73868	0.194648	0.37998	DOWN	165.02	165.019	165.02	57.8257	57.6188	57.9242	96580.9	2.91634e+06	509976	1.50578e+06	1.30937e+06			258		M165T58	y
835		1.9183	0.93983	1.90744	0.194851	0.380034	UP	764.715	764.715	764.717	6.52772	6.5197	6.61828	62180.9	83996.2	5997.47	161130	69784		[M-2H+K]- 727.755	12		M765T7_1	n
836		1.60736	-0.684696	-1.82388	0.194985	0.38007	DOWN	289.988	289.987	289.988	18.3273	18.1643	18.6728	83107.7	1.12342e+06	390591	698919	99738.4		[M+Cl]- 255.018 [M-H]- 290.995	29		M290T18	y
837		2.05359	1.03815	1.5939	0.195402	0.38018	UP	534.716	534.715	534.717	7.00302	6.93172	7.20757	42943	97367.4	62929.7	199953	92016.4			94		M535T7	n
838		1.93783	-0.954441	-1.64657	0.195596	0.380231	DOWN	114.937	114.936	114.937	56.4548	56.396	56.6677	279650	4.18935e+06	1.01931e+06	2.16161e+06	1.87369e+06			268		M115T56_2	n
839		1.8827	0.912804	1.89765	0.195657	0.380247	UP	644.802	644.801	644.803	6.54741	6.51363	6.62507	136685	227048	18274.2	427463	182011		[M+Cl]- 609.838	12		M645T7	n
840		2.26098	1.17695	1.70758	0.195854	0.380299	UP	542.747	542.747	542.748	7.01067	6.96173	7.22208	146106	300896	151740	680320	353684			94		M543T7	n
841		1.53292	0.616284	1.91067	0.195895	0.38031	UP	801.353	801.352	801.355	1.71513	1.6939	1.76392	115155	362315	6273.02	555400	174922			5		M801T2_2	n
842		2.01906	1.01368	1.60484	0.196362	0.380432	UP	333.06	333.059	333.06	20.2827	20.1228	20.5583	136372	791176	467098	1.59743e+06	734175			115		M333T20	y
843		1.48112	0.566693	1.89409	0.196669	0.380512	UP	114.936	114.936	114.937	17.478	17.3133	17.4938	208041	2.72226e+06	107777	4.032e+06	1.19284e+06		[M+Cl]- 79.9638 [M-H]- 115.946	3		M115T17_2	n
844		48.4975	5.59984	1.90425	0.197062	0.380615	UP	335.065	335.065	335.065	23.4848	23.4772	23.4925	45645.7	6747.65	6574.53	340075	303114			45		M335T23	y
845		1.68948	0.756583	1.58025	0.197115	0.380629	UP	386.716	386.716	386.717	6.69198	6.63513	6.9504	2183317	1.49338e+07	6.50192e+06	2.52304e+07	9.2245e+06		[M+2Cl]2- 703.494 [M-H+Cl]2- 739.471	43		M387T7	n
846		1.20692	0.271326	1.70809	0.197414	0.380706	UP	132.967	132.967	132.967	6.76742	6.76293	6.79673	89678.1	1.11492e+06	89572.5	1.34562e+06	216105			19		M133T7_2	n
847		7.26289	2.86054	1.89736	0.198005	0.380859	UP	150.023	150.023	150.023	6.53293	6.49948	6.62507	96599.9	45665.7	7550.53	331665	260972		[M+Cl+NH3]- 98.0269	12		M150T7_1	y
848		1.30703	-0.386294	-1.68339	0.198078	0.380878	DOWN	229.12	229.119	229.12	6.91838	6.87853	7.10713	81431.8	1.22643e+06	270283	938329	121716			14		M229T7_3	y
849		1.72936	0.790241	1.57971	0.198261	0.380925	UP	504.63	504.629	504.631	6.69912	6.62103	6.97748	1.14767e+06	8.17951e+06	3.70761e+06	1.41453e+07	5.38892e+06			43		M505T7_1	n
850		1.37322	0.457567	1.84403	0.198346	0.380947	UP	181.977	181.976	181.977	1.68298	1.66396	1.7094	407307	2.72757e+06	173682	3.74557e+06	940271	[43][M+1]-		5		M182T2_2	n
851		1.81498	0.859956	1.70025	0.198365	0.380952	UP	620.767	620.766	620.768	7.07191	7.00745	7.28143	75011.8	212947	68338	386495	163053		[M+Cl]- 585.795	73		M621T7_2	n
852		1.78802	0.838363	1.57841	0.199049	0.381127	UP	618.554	618.552	618.554	6.68568	6.6018	6.97748	1.08478e+06	6.25858e+06	3.04362e+06	1.11905e+07	4.47498e+06		[M+Cl]- 583.584	43		M619T7_1	n
853		2.00776	1.00559	1.56972	0.199692	0.381291	UP	104.044	104.043	104.044	14.1193	13.8704	14.4066	28515	247164	157767	496246	225050			343		M104T14	n
854		2.86926	1.52068	1.85055	0.199943	0.381355	UP	126.887	126.885	126.89	13.7796	13.6628	13.8964	83206136	1.02265e+08	1.76928e+08	2.93424e+08	2.6613e+07			8		M127T14	n
855		2.56663	1.35987	1.86584	0.200104	0.381396	UP	239.099	239.098	239.099	6.52206	6.45685	6.60465	55266.1	70160.1	11052.1	180075	101433			68		M239T7_4	y
856		1.7195	0.781993	1.57434	0.200239	0.38143	UP	500.636	500.635	500.637	6.68568	6.6018	6.97748	1.28539e+06	8.28877e+06	3.67373e+06	1.42526e+07	5.43629e+06		[M+Cl]- 465.667	43		M501T7_1	n
857		2.92972	1.55076	1.74177	0.200667	0.381538	UP	594.565	594.564	594.567	6.67687	6.656	6.76942	58795.5	130865	79199.7	383399	238308			12		M595T7	n
858		1.90143	0.927081	1.84169	0.200688	0.381544	UP	396.745	396.744	396.745	6.93202	6.82762	7.13605	169295	1.09368e+06	146191	2.07955e+06	915582			147		M397T7_2	n
859		12.0465	3.59054	1.8797	0.200825	0.381578	UP	91.0288	91.0287	91.0289	5.81641	5.75342	5.95527	295662	251362	45725	3.02803e+06	2.55815e+06		[M-H-C6H8O6]- 268.078	41		M91T6	n
860		1.88469	0.914326	1.85751	0.200957	0.381611	UP	530.722	530.721	530.723	6.99042	6.91743	7.19343	134081	491470	47198.6	926269	402675			94		M531T7_1	n
861		2.81346	-1.49235	-1.6383	0.200996	0.381621	DOWN	228.995	228.994	228.995	55.0702	54.8643	55.0832	48564.9	727979	442758	258484	224365			141		M229T55_2	y
862		1.49004	0.57535	1.80694	0.201131	0.381655	UP	249.964	249.964	249.965	1.69188	1.66396	1.7094	1.3987e+06	7.72899e+06	785109	1.15165e+07	3.54462e+06	[71][M+1]-		5		M250T2_2	n
863		2.43993	-1.28684	-1.52838	0.201173	0.381665	DOWN	182.989	182.989	182.989	50.3063	50.2492	50.406	792074	1.51523e+07	7.09179e+06	6.20988e+06	7.23929e+06			200		M183T50_2	y
864		9.86699	-3.30261	-1.84837	0.201175	0.381666	DOWN	246.039	246.039	246.039	6.16623	6.1382	6.19427	15757.7	52610	44136.2	5067.36	6063.1			326		M246T6	y
865		1.67126	0.740937	1.76009	0.201266	0.381689	UP	249.964	249.964	249.964	7.29578	7.23385	7.53123	585113	9.47991e+06	1.78809e+06	1.58434e+07	6.00139e+06	[72][M+1]-		25		M250T7	n
866		1.55663	0.638427	1.778	0.201276	0.381691	UP	317.952	317.952	317.952	1.70097	1.67845	1.71985	1.40902e+06	6.31532e+06	889459	9.83062e+06	3.30693e+06	[127][M+1]-		5		M318T2_2	n
867		1.98462	0.988863	1.73752	0.201354	0.381711	UP	242.065	242.065	242.065	13.126	13.1136	13.2284	168618	2.25191e+06	698396	4.46918e+06	2.09705e+06			56		M242T13	y
868		1.66553	0.735981	1.7746	0.201502	0.381748	UP	744.826	744.825	744.827	7.2988	7.18892	7.45837	39910.8	168071	28691.3	279928	105337		[M+Cl+NaCOOH]- 641.87 [M+Cl]- 709.857 [M-H]- 745.833	25		M745T7_2	n
869		1.90151	0.927149	1.76122	0.201577	0.381767	UP	438.886	438.886	438.887	5.80717	5.70013	5.98502	43043.5	132344	33023.7	251655	112591		[M+Cl+CF3COOH]- 269.917	41		M439T6	n
870		1.53542	0.618629	1.53866	0.20179	0.38182	UP	733.864	733.863	733.865	1.69998	1.67912	1.72085	66020.9	173091	65574.4	265767	81138.3	[243][M+1]-		5		M734T2	n
871		1.2942	0.372059	1.64705	0.20264	0.382031	UP	121.03	121.03	121.03	23.2068	23.1952	23.2878	187613	926210	122795	1.1987e+06	258908			33		M121T23	y
872		1.69219	0.758893	1.58571	0.202743	0.382057	UP	442.678	442.677	442.678	6.69555	6.63513	6.84702	1.82453e+06	1.19166e+07	4.67984e+06	2.01652e+07	7.69908e+06		[3M-2H]2- 295.791	43		M443T7_1	n
873		1.12756	-0.1732	-1.60063	0.20295	0.382108	DOWN	123.902	123.902	123.902	7.00302	6.98842	7.19343	193834	1.57451e+06	95193	1.39639e+06	167597			94		M124T7_1	n
874		3.9878	1.99559	1.77269	0.20323	0.382177	UP	142.012	142.012	142.012	8.65088	8.61462	8.77922	41811.9	98721	72266.5	393680	278989			84		M142T9	n
875		1.65059	0.722979	1.52262	0.203327	0.382201	UP	102.957	102.957	102.957	6.829	6.61828	7.25432	20477126	3.46552e+08	1.90879e+08	5.72014e+08	1.71301e+08		[M-H]- 103.972	14		M103T7_1	n
876		2.17006	1.11774	1.69414	0.203375	0.382213	UP	649.53	649.528	649.531	6.71198	6.61112	6.9368	344891	1.44985e+06	623877	3.14626e+06	1.61828e+06		[3M+2Cl]2- 409.71	43		M650T7_1	n
877		11.5848	3.53416	1.82625	0.203708	0.382295	UP	865.508	865.507	865.509	2.20933	2.19872	2.21995	35001.9	3820.8	6617.82	50128.4	43417.4			211		M866T2	n
878		1.82475	0.867701	1.62721	0.203948	0.382354	UP	392.751	392.75	392.751	6.60591	6.57188	6.63993	87278	252928	99344.7	461531	198579			12		M393T7_3	n
879		61.2035	5.93554	1.86002	0.203961	0.382357	UP	832.602	832.601	832.602	1.41917	1.40544	1.4329	20755.3	0	0	48312.3	44988.4		[M+Cl]- 797.629 [M-H]- 833.606	9		M833T1	y
880		1.48858	-0.573941	-1.61118	0.203975	0.382361	DOWN	242.065	242.065	242.065	16.859	16.5154	17.1017	227239	9.33131e+06	1.5493e+06	6.26858e+06	2.9052e+06		[M+Cl]- 207.094 [M-H]- 243.075	93		M242T17	y
881		1.6337	0.708145	1.5657	0.204	0.382367	UP	388.713	388.713	388.714	6.66838	6.58672	6.84702	1.10446e+06	7.80888e+06	2.98094e+06	1.27574e+07	4.59145e+06		[M-H]- 389.721	12		M389T7	n
882		3.09601	1.63041	1.84256	0.204038	0.382376	UP	99.0454	99.0452	99.0454	23.7696	23.6822	23.825	98543.3	205347	41848.4	635756	402425			220		M99T24	y
883		1.62152	0.697346	1.85486	0.204252	0.382428	UP	442.895	442.894	442.896	7.16817	7.09763	7.4125	1696983	1.09508e+07	288298	1.77569e+07	6.34896e+06	[184][M]-	[M-H+HCOOH]- 397.901	73		M443T7_2	y
884		1.84322	0.882231	1.6881	0.204474	0.382483	UP	358.844	358.843	358.844	7.0066	6.96173	7.20757	140616	732652	228256	1.35044e+06	591351			94		M359T7	n
885		1.91058	-0.934009	-1.84204	0.204516	0.382493	DOWN	424.087	424.086	424.087	30.7445	30.7168	30.85	12967.8	56593.8	2445.26	29356.7	25493.8			396		M424T31	y
886		1.92281	-0.943214	-1.80618	0.204605	0.382514	DOWN	114.937	114.936	114.937	52.8689	52.6528	52.9273	300101	5.78718e+06	481310	3.00949e+06	2.61984e+06			139		M115T53	n
887		13.7845	3.78497	1.82572	0.20468	0.382533	UP	831.599	831.599	831.599	1.41185	1.40544	1.41827	96483.2	16930.2	29323.9	240667	210222	[264][M+1]-		9		M832T1	n
888		1.99992	0.99994	1.7688	0.204971	0.382604	UP	374.907	374.907	374.907	6.47682	6.46843	6.48522	1.53514e+06	1.08345e+06	255933	2.16681e+06	1.02952e+06		[M+Cl+NaCOOH]- 271.95 [M-H+NaCOOH]- 307.927	68		M375T6	n
889		3.69142	1.88418	1.85292	0.205048	0.382622	UP	323.029	323.029	323.03	24.2263	24.183	24.2747	529633	1.05972e+06	28944.2	3.91187e+06	2.66594e+06			102		M323T24	y
890		1.92605	-0.945643	-1.68257	0.205218	0.382664	DOWN	201.077	201.077	201.077	48.4352	48.405	48.4527	15233.5	86473.6	15606.9	44632.4	40144.7			104		M201T48_1	y
891		1.82664	0.869196	1.84893	0.2054	0.382708	UP	392.751	392.75	392.751	6.96783	6.84275	7.12153	113221	658421	17851.9	1.2027e+06	509562			94		M393T7_2	n
892		1.73011	0.790866	1.57166	0.205497	0.382731	UP	446.672	446.671	446.672	6.68883	6.64677	6.84702	1.18764e+06	8.18046e+06	3.43645e+06	1.41531e+07	5.61388e+06		[M-2H+K]- 409.71	43		M447T7	n
893		4.63222	2.2117	1.82349	0.2058	0.382804	UP	563.588	563.588	563.59	6.73832	6.58517	6.85163	47629.3	41836.7	18266.5	193797	143180	[209][M+1]-		43		M564T7	n
894		2.09986	1.0703	1.79788	0.206068	0.382869	UP	188.906	188.905	188.906	22.5998	22.463	22.7437	408986	4.70605e+06	896626	9.88207e+06	4.90521e+06			16		M189T23_1	n
895		1.85946	0.894887	1.69189	0.206078	0.382871	UP	630.795	630.794	630.797	7.12827	7.05318	7.31025	49481.5	137807	41648	256246	113874		[M-H+HCOOH]- 585.795 [M-H-C2H4]- 659.827	73		M631T7_2	n
896		2.18797	1.12959	1.82624	0.206509	0.382975	UP	99.0088	99.0087	99.009	23.227	23.1952	23.3023	173658	661390	79358.6	1.4471e+06	740948		[M-H]- 100.017 [M-H-H20]- 118.028	105		M99T23_2	y
897		1.88167	0.912012	1.60675	0.206596	0.382996	UP	426.831	426.831	426.832	7.03138	6.97705	7.25283	100560	454437	198159	855100	383769			94		M427T7	n
898		3.13791	1.64981	1.66013	0.207009	0.383095	UP	627.538	627.538	627.538	6.70839	6.64937	6.76742	43560.3	43455.8	36882.3	136360	89638.3		[M+Cl]- 592.573	43		M628T7	n
899		9.92307	3.31079	1.81244	0.207507	0.383213	UP	481.949	481.949	481.95	8.58188	8.54913	8.61462	14511.7	7849.14	8581.91	77887.6	66379.4			84		M482T9_1	n
900		1.95351	-0.966067	-1.81442	0.207581	0.383231	DOWN	331.127	331.126	331.127	30.6542	30.6257	30.7597	19670.4	111816	6372.29	56973.9	51962.9			101		M331T31	y
901		3.04759	-1.60767	-1.54683	0.208132	0.383362	DOWN	214.109	214.109	214.109	57.4383	57.1355	57.6705	31839.2	754408	475791	247278	309973			382		M214T57_1	y
902		1.41085	0.496561	1.77051	0.208507	0.38345	UP	161.046	161.045	161.046	21.3251	21.2855	21.4465	119001	1.14157e+06	93690.9	1.61058e+06	449153			316		M161T21	y
903		13.1102	3.71261	1.79816	0.208666	0.383488	UP	830.596	830.596	830.596	1.41901	1.40544	1.4329	197103	36656.6	63491.2	487247	429354	[264][M]-	[M+Cl]- 795.616 [M-H]- 831.599	9		M831T1	y
904		1.38823	0.473247	1.51049	0.208716	0.3835	UP	214.049	214.049	214.049	10.7049	10.5676	10.8365	1.87077e+06	3.38063e+07	9.4146e+06	4.6931e+07	1.17415e+07	[62][M]-	[M+Cl]- 179.08 [M-H]- 215.056	99		M214T11	y
905		1.87867	0.909712	1.68422	0.208755	0.383509	UP	248.961	248.96	248.961	8.44262	8.3429	8.65088	3.93807e+06	2.61189e+07	7.89897e+06	4.90687e+07	2.22405e+07			72		M249T8	n
906		1.67452	0.743745	1.67768	0.209018	0.38357	UP	498.639	498.638	498.64	6.66187	6.60672	6.84702	372413	2.68785e+06	640037	4.50085e+06	1.75892e+06	[195][M]-		12		M499T7	n
907		2.03842	1.02745	1.7404	0.209588	0.383704	UP	590.679	590.678	590.68	6.98842	6.93172	7.19343	109107	249195	63041.7	507964	249692			94		M591T7_2	n
908		1.37408	0.458468	1.59386	0.209682	0.383726	UP	401.914	401.913	401.914	2.07068	2.05135	2.10977	97092.4	876134	162592	1.20388e+06	316885	[173][M+1]-		28		M402T2_2	n
909		1.95106	0.96426	1.70657	0.20974	0.38374	UP	832.762	832.761	832.764	7.1404	7.08237	7.35402	95546.6	173277	49379.4	338074	159802		[2M-2H+K]- 397.901	73		M833T7	n
910		34.411	5.1048	1.82234	0.209811	0.383756	UP	376.067	376.067	376.067	20.5781	20.572	20.5842	35650.7	9525.01	7913.38	327765	302369			39		M376T21	y
911		1.85504	0.891448	1.59924	0.210008	0.383802	UP	472.764	472.763	472.765	6.99387	6.94663	7.19343	229788	831567	343616	1.54259e+06	689153			94		M473T7_1	n
912		1.55162	-0.633779	-1.6043	0.210042	0.38381	DOWN	144.035	144.035	144.036	6.89073	6.7122	7.04992	278595	2.51706e+06	423665	1.62221e+06	868258			14		M144T7_2	y
913		10.3693	3.37425	1.78329	0.210222	0.383852	UP	816.579	816.579	816.58	1.42697	1.42104	1.4329	17702.4	2847.65	4932.28	34750.5	30591.1		[M-2H+Na]- 795.616 [M-H-CH2]- 831.599	9		M817T1	y
914		1.43829	0.524351	1.62217	0.210301	0.38387	UP	706.81	706.807	706.81	1.6192	1.60773	1.62699	83700.1	84265.6	16204.5	121198	35950.9			23		M707T2_1	n
915		1.60655	-0.683966	-1.54297	0.210664	0.383955	DOWN	76.0122	76.0121	76.0123	0.184545	0.10042	0.310898	98906.2	2.32309e+06	833326	1.44601e+06	524333			90		M76T0	n
916		9.99495	3.3212	1.77029	0.210722	0.383968	UP	762.513	762.513	762.513	1.54735	1.54548	1.54922	287118	40998.8	65495.9	412160	357189			202		M763T2_2	n
917		1.39167	0.47682	1.64828	0.210725	0.383969	UP	222.868	222.868	222.869	6.96687	6.8879	7.15037	233247	1.90551e+06	290997	2.65185e+06	728284			94		M223T7_1	n
918		9.45678	3.24135	1.76003	0.210761	0.383977	UP	738.511	738.511	738.511	1.54735	1.54548	1.54922	94913.6	13258.9	22965	130125	112692			202		M739T2	y
919		41.7108	5.38235	1.81379	0.211016	0.384036	UP	762.513	762.513	762.513	2.20933	2.19872	2.21995	111714	3201.35	5544.91	155337	145174			211		M763T2_1	n
920		1.28539	-0.362201	-1.63288	0.211189	0.384076	DOWN	330.868	330.868	330.869	13.592	13.5761	13.6024	36481.2	514022	111493	399897	47157.9			154		M331T14_1	n
921		8.88069	3.15067	1.81399	0.211237	0.384087	UP	356.941	356.941	356.941	1.72367	1.66215	1.73463	80011.8	40888.2	6551.92	363116	307603			5		M357T2	y
922		1.9409	0.956724	1.63636	0.211346	0.384112	UP	792.43	792.43	792.433	6.68568	6.62103	6.77227	395257	2.47279e+06	944530	4.79944e+06	2.27437e+06		[M-H]- 793.441	43		M792T7	n
923		1.75333	0.810096	1.70956	0.211404	0.384125	UP	454.928	454.927	454.929	1.70803	1.69475	1.71985	303044	983152	208172	1.72379e+06	720927	[186][M+2]-		5		M455T2	n
924		2.04297	1.03067	1.63925	0.211485	0.384144	UP	462.735	462.734	462.736	6.98697	6.8879	7.15037	158269	708762	295608	1.44798e+06	722964			94		M463T7	n
925		1.41521	0.501021	1.70782	0.211756	0.384206	UP	182.978	182.977	182.978	1.67878	1.67195	1.7094	166800	947232	110559	1.34054e+06	383256	[43][M+2]-		5		M183T2_1	n
926		1.76467	0.819401	1.67303	0.212007	0.384264	UP	520.91	520.91	520.911	1.7218	1.69182	2.0435	8.27965e+06	2.76056e+07	7.13849e+06	4.87149e+07	2.06552e+07	[199][M]-		5		M521T2	n
927		1.89386	-0.921333	-1.79533	0.212091	0.384283	DOWN	498.002	498.001	498.002	48.4096	48.405	48.4208	18071.9	96606.7	4293.88	50745.8	44035.6			104		M498T48	n
928		1.26356	-0.337493	-1.48665	0.212095	0.384284	DOWN	494.974	494.974	494.975	20.1871	20.15	20.2718	20596.3	160037	25992.8	126656	28929.8			228		M495T20	n
929		1.6978	0.763669	1.53027	0.212148	0.384296	UP	502.633	502.632	502.634	6.69912	6.64677	6.99088	1.92936e+06	1.1479e+07	4.93611e+06	1.94891e+07	7.60477e+06		[M-H]- 503.641 [2M-3H]3- 755.463	43		M503T7_1	n
930		3.53724	1.82263	1.74096	0.212266	0.384323	UP	261.959	261.959	261.96	4.83112	4.82667	4.98993	459973	947542	523209	3.35169e+06	2.33392e+06	[83][M]-		227		M262T5	y
931		1.87427	0.906329	1.72306	0.2124	0.384354	UP	589.902	589.902	589.904	1.72907	1.6939	2.0435	484273	1.66384e+06	362197	3.11849e+06	1.41667e+06	[213][M+1]-		5		M590T2	n
932		1.76472	0.819438	1.67745	0.21243	0.384361	UP	600.708	600.707	600.709	7.02468	6.96173	7.22208	82516.3	268725	67277.2	474225	201240			94		M601T7	n
933		1.48498	-0.57044	-1.48763	0.21245	0.384365	DOWN	329.062	329.062	329.063	21.326	21.2415	21.4898	69708.1	1.71565e+06	427374	1.15534e+06	492890			316		M329T21	y
934		3.67172	1.87646	1.6483	0.212667	0.384415	UP	190.885	190.885	190.885	5.1951	5.07773	5.31247	80949.5	441951	443293	1.62272e+06	1.15887e+06			80		M191T5_1	n
935		12.946	3.69443	1.79122	0.213073	0.384507	UP	340.25	340.25	340.25	1.49465	1.49078	1.49851	150497	29352.8	30795.7	380000	337664			113		M340T1	y
936		9.12097	3.18919	1.74268	0.213197	0.384535	UP	776.55	776.55	776.55	1.45699	1.4522	1.46178	48010.4	13901.1	24077.3	131353	114225			7		M777T1	n
937		16.3725	4.0332	1.79948	0.213287	0.384556	UP	87.02	87.02	87.02	1.81078	1.80703	1.81452	90276.6	46798.6	29830.2	766208	691810			325		M87T2	n
938		1.91112	-0.93442	-1.7876	0.213317	0.384563	DOWN	165.019	165.019	165.02	57.3653	57.3652	57.3653	97094.4	2.40626e+06	109626	1.25882e+06	1.10637e+06			330		M165T57_2	y
939		1.37898	-0.463604	-1.51471	0.213338	0.384567	DOWN	668.77	668.769	668.771	1.59227	1.57437	1.60041	176493	265840	68878.3	192780	47278.9			23		M669T2	n
940		1.86746	-0.901081	-1.6784	0.21347	0.384597	DOWN	66.9589	66.9587	66.959	49.4388	49.4118	49.4798	25278.6	63478.4	9448.99	33727.2	29212.1		[M+Cl]- 31.9874	2		M67T49	n
941		1.67876	0.747395	1.68801	0.213498	0.384603	UP	452.923	452.923	452.924	1.7218	1.69182	2.0588	12303149	4.57765e+07	9.34731e+06	7.68477e+07	3.04808e+07	[186][M]-		5		M453T2	n
942		2.24258	1.16516	1.65607	0.213728	0.384656	UP	826.858	826.857	826.859	1.70635	1.6939	1.72423	305338	554520	243910	1.24356e+06	678118	[263][M]2-		5		M827T2_1	n
943		2.00552	1.00398	1.77112	0.213891	0.384692	UP	336.789	336.789	336.789	6.9307	6.85775	7.10713	372753	2.76672e+06	373244	5.54872e+06	2.6949e+06		[M-2H+K]- 299.829	147		M337T7	n
944		11.0797	3.46985	1.78993	0.21396	0.384708	UP	804.579	804.572	804.579	1.42104	1.41901	1.44724	343348	61462.7	44691.2	680989	597824		[M-H]- 805.583	9		M805T1	y
945		1.40431	0.48986	1.62046	0.214088	0.384737	UP	495.951	495.95	495.951	25.7787	25.7633	25.794	87679.6	835818	139852	1.17375e+06	333027		[M+Cl]- 460.982 [M-H]- 496.958	59		M496T26	n
946		21.3657	4.41723	1.79673	0.214182	0.384758	UP	257.007	257.007	257.007	20.6517	20.6297	20.6737	56568	17698.8	3820.99	378147	347452			39		M257T21	y
947		8.50574	3.08844	1.72415	0.214787	0.384894	UP	829.584	829.583	829.584	1.42697	1.42104	1.4329	94839.5	21076.6	36505.7	183508	159040			9		M830T1	n
948		2.09973	-1.07021	-1.56548	0.214789	0.384894	DOWN	259.005	259.005	259.005	51.3415	51.2448	51.3463	84482.7	1.48455e+06	399540	706752	762178			95		M259T51	y
949		1.38697	0.471937	1.71511	0.214988	0.384939	UP	224.903	224.903	224.903	10.1189	10.105	10.1327	210537	2.46296e+06	228546	3.41606e+06	934981			31		M225T10_2	n
950		1.7994	0.847512	1.64654	0.215561	0.385067	UP	288.859	288.859	288.859	6.56977	6.5197	6.6103	639442	2.36927e+06	675269	4.26325e+06	1.87442e+06		[M+Cl+CF3COOH]- 119.909	12		M289T7_3	n
951		1.56049	0.641995	1.51077	0.215651	0.385087	UP	78.9591	78.959	78.9592	22.6273	22.5218	22.7347	8677222	1.24125e+08	4.41805e+07	1.93695e+08	6.64062e+07			16		M79T23	y
952		3.47708	1.79788	1.63217	0.215693	0.385096	UP	571.29	571.29	571.291	6.14373	6.1264	6.16107	23545.1	39803.2	37555	138399	97657.3			196		M571T6	y
953		1.69532	0.761555	1.67711	0.215742	0.385107	UP	869.34	869.34	869.343	1.7088	1.66315	1.7388	61532	128113	26856.7	217191	87989.3	[274][M+1]2-		5		M869T2_2	n
954		2.00716	-1.00516	-1.5357	0.215786	0.385117	DOWN	679.199	679.198	679.199	29.8563	29.8553	29.9782	10275	61249.7	17692.9	30251	30154.9			253		M679T30	y
955		2.16717	1.11581	1.78434	0.215812	0.385122	UP	417.012	417.012	417.013	8.79888	8.62532	8.83965	408193	2.67722e+06	133550	5.80199e+06	3.03026e+06			15		M417T9	y
956		1.76307	0.818089	1.62913	0.215905	0.385143	UP	242.176	242.176	242.177	5.1473	5.09185	5.3449	206575	914696	268514	1.61267e+06	691787	[69][M]-		80		M242T5_2	n
957		6.4411	2.68731	1.77315	0.216416	0.385256	UP	460.648	460.648	460.649	6.54617	6.52772	6.64937	72652.2	54052.7	24307.1	348159	286259		[3M+2Cl]2- 283.785 [M+Cl]- 425.678	12		M461T7_1	n
958		2.04062	1.02901	1.57799	0.216435	0.38526	UP	682.504	682.503	682.506	6.69198	6.63513	6.70315	232515	1.18674e+06	587674	2.42169e+06	1.2215e+06			43		M683T7	n
959		3.45795	1.78992	1.75288	0.216911	0.385365	UP	213.05	213.049	213.05	9.33681	9.14318	9.57572	11989040	6.23993e+07	2.11385e+07	2.15774e+08	1.50071e+08	[61][M]-	[M-H+NaCOOH]- 146.07	4		M213T9_1	y
960		1.87213	0.904684	1.67677	0.216922	0.385368	UP	800.852	800.851	800.854	1.72085	1.6939	1.73392	333072	1.06098e+06	270476	1.9863e+06	916758			5		M801T2_1	n
961		1.64164	0.715135	1.59054	0.217175	0.385424	UP	406.774	406.773	406.775	6.99042	6.903	7.15037	127340	711010	203478	1.16722e+06	453217			94		M407T7	n
962		8.27192	3.04822	1.71694	0.217246	0.385439	UP	714.512	714.512	714.512	1.54735	1.54548	1.54922	82557.9	12753.1	20284.7	107416	93316.8			202		M715T2	n
963		11.0615	3.46747	1.73783	0.217334	0.385458	UP	854.598	854.598	854.598	1.40442	1.40341	1.40544	156726	29532.2	51151.3	332259	297352	[270][M]-		9		M855T1	n
964		1.74867	0.806257	1.61363	0.217637	0.385525	UP	494.818	494.818	494.819	7.07213	7.00745	7.28143	77332.6	362210	108355	633385	270156		[M+Cl]- 459.845 [M-H]- 495.822	73		M495T7	n
965		1.37136	0.455603	1.47102	0.217771	0.385554	UP	185.994	185.994	185.994	7.33935	7.32412	7.3478	58388.2	464877	156899	637512	129232		[M+Cl]- 151.025	25		M186T7_2	n
966		1.82949	0.871443	1.62845	0.217784	0.385557	UP	822.734	822.733	822.735	7.09894	7.05318	7.33935	58678.4	153009	47164.1	279929	126488		[M+Cl+CF3COOH]- 653.784	73		M823T7_2	n
967		1.89811	0.924561	1.73221	0.218033	0.385611	UP	402.78	402.779	402.78	6.98359	6.8879	7.19343	148703	674401	104959	1.28009e+06	596465			94		M403T7_2	n
968		7.44585	2.89644	1.69074	0.218627	0.385741	UP	879.601	879.601	879.601	1.41222	1.40341	1.42104	32465.5	8442.6	14623	66537.6	57690.2	[277][M+1]-		9		M880T1	n
969		1.92545	0.945198	1.56937	0.218749	0.385767	UP	212.865	212.865	212.865	5.99569	5.87093	6.07177	55733.1	685281	301419	1.31948e+06	631710			269		M213T6_1	n
970		1.83502	0.875792	1.74785	0.218943	0.385809	UP	404.777	404.776	404.777	6.99042	6.91743	7.16477	216046	1.10855e+06	111456	2.03421e+06	910497			94		M405T7	y
971		4.3304	2.1145	1.63993	0.219019	0.385826	UP	198.84	198.84	198.84	6.75809	6.52772	7.03112	269099	609837	693185	2.64084e+06	2.03001e+06		[M-H]- 199.85	19		M199T7	n
972		2.45062	-1.29315	-1.48605	0.219204	0.385866	DOWN	114.937	114.936	114.937	52.1465	52.1342	52.3798	323925	1.0221e+07	5.7637e+06	4.17051e+06	4.06342e+06			112		M115T52	n
973		1.73768	0.797161	1.61004	0.219993	0.386036	UP	482.793	482.792	482.794	7.02427	6.96173	7.22208	254941	1.01698e+06	291229	1.76718e+06	752676			94		M483T7	n
974		10.8966	3.44581	1.72232	0.220101	0.386059	UP	878.597	878.597	878.598	1.39669	1.38997	1.40341	127365	22687.2	39295.4	252714	227965	[277][M]-	[M+Cl+HCOOH]- 797.629 [M-H+HCOOH]- 833.606	9		M879T1	n
975		1.59342	0.672131	1.67224	0.220186	0.386077	UP	386.94	386.94	386.941	1.70803	1.67845	2.0739	310032	1.18972e+06	192357	1.89573e+06	705509	[169][M+2]-		5		M387T2	n
976		4.87799	2.28629	1.7577	0.220236	0.386088	UP	213.05	213.049	213.05	8.76023	8.67302	8.9495	9487079	2.17399e+07	4.20004e+06	1.06047e+08	8.29706e+07		[M-H]- 214.057 [M-H-CH2]- 228.07	15		M213T9_2	y
977		2.73797	1.45311	1.50996	0.220265	0.386094	UP	704.601	704.6	704.603	6.98884	6.94663	7.20757	43171.5	36484	38114.3	100616	62921.6			94		M705T7_1	n
978		8.28014	3.04965	1.74927	0.220638	0.386174	UP	224.903	224.903	224.903	18.5321	18.5157	18.5485	204650	295258	176464	2.44478e+06	2.12104e+06			290		M225T19_1	n
979		3.56439	1.83365	1.6711	0.220739	0.386195	UP	302.101	302.101	302.102	5.37623	5.2115	5.39475	1.13798e+06	1.95761e+06	1.35376e+06	6.97769e+06	5.02398e+06			22		M302T5	y
980		2.43202	1.28216	1.61338	0.221183	0.38629	UP	268.887	268.887	268.887	5.54107	5.53	5.59928	26383.6	130049	69428.8	316283	187490		[M-H-CO]- 297.89	21		M269T6_1	y
981		1.86598	-0.899935	-1.52251	0.221377	0.386331	DOWN	630.142	630.141	630.143	32.9412	32.8942	33.05	10704.5	59107.1	15360	31411.5	27509.6	[223][M+1]-		292		M630T33	n
982		1.77487	0.82771	1.69456	0.221469	0.386351	UP	286.862	286.861	286.862	6.5349	6.5064	6.6103	671476	2.42537e+06	406646	4.30471e+06	1.87739e+06		[M-H+HCOOH]- 241.864	12		M287T7_2	n
983		1.74092	0.799847	1.59085	0.221918	0.386446	UP	422.837	422.837	422.838	7.03116	6.97705	7.23647	398847	1.87223e+06	567873	3.25939e+06	1.39946e+06			94		M423T7_1	n
984		1.92188	0.942522	1.55319	0.222148	0.386494	UP	590.57	590.57	590.572	6.75345	6.66187	6.97748	304562	1.76943e+06	785957	3.40064e+06	1.64049e+06			19		M591T7_1	n
985		1.93988	-0.955968	-1.4664	0.222224	0.38651	DOWN	188.906	188.906	188.906	53.5143	53.2417	53.6072	139693	1.52457e+06	519616	785643	701252			312		M189T54_2	n
986		2.06246	1.04436	1.6913	0.222453	0.386559	UP	175.081	175.081	175.081	6.28595	6.23502	6.33688	72312.2	394399	89212.7	813432	419754			42		M175T6_2	y
987		2.54903	1.34995	1.62563	0.222588	0.386587	UP	561.591	561.59	561.592	6.65822	6.63513	6.67687	93163.9	235132	123444	599358	367913			12		M562T7	n
988		1.47349	0.55924	1.44553	0.222641	0.386598	UP	164.879	164.879	164.879	6.56606	6.49948	6.62507	114657	385525	162858	568069	146007			12		M165T7_1	n
989		2.66835	1.41595	1.66296	0.222658	0.386602	UP	572.835	572.835	572.836	7.11567	7.09763	7.32473	37561.8	96847.3	43288.8	258422	162624		[M-H-C3H2O3]- 659.827	73		M573T7_2	n
990		1.9538	0.966285	1.47026	0.22289	0.386651	UP	292.773	292.773	292.774	5.37117	5.26292	5.41937	1214414	1.76141e+06	1.14545e+06	3.44144e+06	1.61403e+06			22		M293T5_1	n
991		7.31602	2.87106	1.6916	0.2231	0.386695	UP	802.565	802.565	802.567	1.44905	1.42328	1.50425	2835475	1.23409e+06	1.60021e+06	9.02862e+06	7.81887e+06	[259][M]-		7		M803T1	n
992		1.82502	0.867913	1.67274	0.223359	0.386749	UP	638.827	638.827	638.828	7.14732	7.09763	7.33935	237612	842715	168274	1.53797e+06	699968			73		M639T7_2	n
993		1.30844	0.387848	1.69867	0.223434	0.386765	UP	182.989	182.989	182.989	1.51101	1.20043	1.5388	588103	2.24264e+06	128407	2.93436e+06	693525			113		M183T2_4	y
994		1.90592	-0.930489	-1.46402	0.223546	0.386788	DOWN	182.989	182.989	182.989	58.6103	58.4767	58.697	175852	2.68182e+06	886814	1.40684e+06	1.22019e+06			299		M183T59_3	y
995		1.85305	-0.889899	-1.61997	0.223628	0.386805	DOWN	228.995	228.994	228.995	56.6185	56.3395	57.061	44632.9	388701	61123.1	209499	181590			368		M229T57	y
996		1.45416	-0.540189	-1.48643	0.223642	0.386808	DOWN	276.799	276.799	276.8	22.2545	22.0922	22.3727	6098915	9.29214e+07	1.8148e+07	6.39003e+07	2.85345e+07			54		M277T22	n
997		7.23495	2.85498	1.68105	0.224303	0.386946	UP	853.585	853.584	853.586	1.42005	1.40341	1.4367	49123	13977.8	19104.8	102778	89477.1			9		M854T1	n
998		1.74125	0.800124	1.47308	0.224353	0.386956	UP	316.739	316.739	316.74	5.27225	5.16773	5.37795	316387	3.5681e+06	1.73764e+06	6.21295e+06	2.57909e+06			22		M317T5_1	n
999		3.57248	1.83692	1.5936	0.224674	0.387023	UP	342.734	342.734	342.735	6.55992	6.52772	6.78243	107843	123769	121847	442163	323895		[M-2H]2- 687.499	12		M343T7_1	n
1000		2.3735	1.24702	1.73022	0.224858	0.38706	UP	203.021	203.021	203.021	9.34703	9.18703	9.5613	1.9186e+06	3.00098e+06	244193	7.12281e+06	4.11896e+06		[M+2Cl]2- 336.103	4		M203T9_1	n
1001		1.8056	0.852479	1.61415	0.22517	0.387125	UP	608.739	608.739	608.74	7.03777	6.97705	7.22208	153740	456602	124893	824441	374427			94		M609T7	n
1002		1.97218	0.979794	1.554	0.225215	0.387134	UP	830.766	830.765	830.767	7.12958	7.08237	7.35402	69391.5	166872	74034.3	329101	164966		[2M+Cl]- 397.901	73		M831T7	n
1003		3.04569	-1.60677	-1.68861	0.225456	0.387184	DOWN	222	222	222	18.3647	18.2017	18.5812	340679	7.40335e+06	5.01676e+06	2.43076e+06	920474		[M-H+NaCOOH]- 155.024	29		M222T18	y
1004		1.77087	0.824455	1.58528	0.22578	0.38725	UP	834.844	834.844	834.847	1.71513	1.6939	1.73392	300896	866919	260636	1.5352e+06	682046	[266][M]-		5		M835T2_2	n
1005		1.31621	0.396394	1.51409	0.225882	0.387271	UP	212.921	212.921	212.922	5.54673	5.47295	5.58315	1.43412e+06	1.62771e+07	2.76327e+06	2.14242e+07	5.19932e+06	[60][M]-		21		M213T6_3	n
1006		1.76334	0.818307	1.57538	0.226337	0.387364	UP	686.759	686.758	686.76	7.07886	7.02257	7.28143	117506	411504	127202	725619	321076		[M+Cl]- 651.786	73		M687T7	n
1007		1.86535	-0.89945	-1.6333	0.226397	0.387377	DOWN	277.145	277.145	277.145	49.285	49.2723	49.2987	21108.4	63139	8635.01	33583.7	30129.3			76		M277T49_2	y
1008		1.6178	0.69403	1.64164	0.226585	0.387415	UP	714.848	714.847	714.849	7.30688	7.21778	7.48752	484045	3.5408e+06	599277	5.7283e+06	2.22881e+06	[239][M]-	[M+Cl+CF3COOH]- 545.894	25		M715T7_2	n
1009		1.55321	0.635251	1.54957	0.226733	0.387445	UP	391.095	391.095	391.096	24.3537	24.3452	24.4518	23186.7	95388.8	23935.7	148159	53909.5			216		M391T24_2	y
1010		11.0075	3.46041	1.69784	0.226854	0.38747	UP	234.899	234.899	234.899	22.2572	22.2	22.3145	51775.9	37234.4	53074.9	409857	376407			54		M235T22	n
1011		1.32527	0.406288	1.53104	0.226898	0.387479	UP	605.876	605.876	605.877	2.0435	2.02312	2.05135	104048	758121	121119	1.00472e+06	251307	[217][M+1]-		28		M606T2_1	n
1012		1.35556	0.438894	1.72289	0.227043	0.387508	UP	180.973	180.973	180.974	1.68536	1.66396	1.71985	14932122	9.95505e+07	186298	1.34947e+08	3.55844e+07	[43][M]-		5		M181T2_1	n
1013		1.21692	0.283239	1.42726	0.227175	0.387535	UP	370.913	370.913	370.914	23.3767	23.3413	23.563	188991	1.92427e+06	342520	2.3417e+06	373210		[M-H-CH2]- 385.936	45		M371T23	n
1014		2260.32	11.1423	1.7216	0.227283	0.387557	UP	113.036	113.036	113.036	0.171151	0.117022	0.22528	154838	0	0	1.79374e+06	1.80463e+06			90		M113T0	y
1015		6.30802	2.65719	1.70287	0.227313	0.387563	UP	472.923	472.923	472.923	24.2018	24.2017	24.2018	33962.4	34489.7	21840.2	217562	184924			102		M473T24	y
1016		1.3458	-0.428461	-1.42468	0.22754	0.387609	DOWN	793.669	793.668	793.67	5.50654	5.47295	5.54013	20137.6	135432	29154.3	100633	30657.1			21		M794T6_1	n
1017		1.72325	0.785135	1.60019	0.227934	0.387689	UP	777.823	777.822	777.825	7.26403	7.15815	7.47312	35732.4	125068	31089.7	215523	92842.3			25		M778T7	n
1018		1.93783	-0.954444	-1.44481	0.227942	0.38769	DOWN	182.989	182.989	182.989	54.678	54.5748	54.711	293921	3.09431e+06	1.06596e+06	1.59653e+06	1.44491e+06			136		M183T55_2	y
1019		3.16523	1.66231	1.66301	0.227942	0.38769	UP	240.929	240.929	240.929	2.10423	2.1016	2.11297	35646	47236.2	22053	149513	104215			28		M241T2	n
1020		6.72362	2.74924	1.66829	0.22808	0.387718	UP	803.569	803.568	803.57	1.44905	1.43835	1.46206	1.21916e+06	593591	686528	3.99108e+06	3.45988e+06	[259][M+1]-		7		M804T1	n
1021		1.49105	0.576332	1.66712	0.228174	0.387737	UP	316.949	316.948	316.949	1.70097	1.67845	1.71985	25259160	1.26728e+08	1.26769e+07	1.88959e+08	6.3399e+07	[127][M]-		5		M317T2_1	n
1022		1.51602	0.60029	1.55745	0.228328	0.387768	UP	390.71	390.71	390.711	6.67787	6.6018	6.84702	383355	2.56718e+06	563056	3.89191e+06	1.36139e+06			12		M391T7	n
1023		1.7713	0.82481	1.64415	0.228428	0.387788	UP	414.805	414.805	414.806	6.99844	6.91743	7.19343	312647	1.41032e+06	273434	2.4981e+06	1.11284e+06			94		M415T7_1	n
1024		1.55227	0.634381	1.5986	0.228623	0.387827	UP	698.87	698.869	698.872	1.69475	1.69182	1.73392	241515	837646	157792	1.30025e+06	475740	[237][M]-		5		M699T2	n
1025		187.692	7.55223	1.71384	0.228692	0.387841	UP	857.524	857.524	857.524	2.93508	2.90263	2.96753	40641	0	0	148706	150286			277		M858T3	y
1026		1.20235	0.265858	1.66793	0.228773	0.387857	UP	70.9462	70.9461	70.9463	6.68078	6.6018	6.89097	6.16659e+06	8.73535e+07	1.80295e+07	1.0503e+08	3.44463e+06			12		M71T7	n
1027		2.41303	1.27085	1.60321	0.228946	0.387892	UP	190.885	190.885	190.885	22.7008	22.579	22.8223	273196	2.64045e+06	1.22863e+06	6.37148e+06	3.83906e+06			259		M191T23_1	n
1028		4.03211	2.01154	1.60244	0.228976	0.387898	UP	596.293	596.293	596.294	6.03769	5.9919	6.08348	16215.7	13178.4	13209.5	53136.7	41120.8	[215][M+1]-		269		M596T6	n
1029		1.33469	-0.416503	-1.42142	0.229873	0.388077	DOWN	870.643	870.642	870.645	5.52841	5.47295	5.5662	47066.1	484837	112579	363259	96300.1	[273][M+2]-		21		M871T6	n
1030		1.77965	0.83159	1.48949	0.230018	0.388106	UP	348.815	348.814	348.815	6.98427	6.91743	7.16477	202325	979643	428180	1.74342e+06	778123			94		M349T7	n
1031		1.84365	-0.882565	-1.61303	0.23028	0.388158	DOWN	152.986	152.986	152.986	48.2893	48.2752	48.2923	10256.1	41503.7	5740.01	22247.1	19864.8			288		M153T48_1	n
1032		2.24317	1.16554	1.44392	0.230398	0.388181	UP	700.803	700.803	700.804	7.12827	7.08237	7.36865	52435	63681.2	54278.3	142848	77922.9			73		M701T7	n
1033		1.52365	0.607533	1.58568	0.230637	0.388229	UP	114.936	114.936	114.937	7.31027	7.09783	7.4292	163260	1.90009e+06	1.02954e+06	2.89507e+06	348194			25		M115T7_1	n
1034		1.67292	0.742366	1.42716	0.230878	0.388276	UP	170.945	170.944	170.945	7.00543	6.59553	7.22722	1223228	1.33788e+07	6.69878e+06	2.23816e+07	8.63174e+06			94		M171T7	y
1035		1.69271	0.759331	1.68454	0.230975	0.388295	UP	88.004	88.004	88.0041	6.81058	6.7975	6.87647	211936	2.58516e+06	208136	4.37591e+06	1.82946e+06			110		M88T7_1	y
1036		2.02907	1.02082	1.50363	0.231013	0.388303	UP	684.762	684.761	684.763	7.07886	7.02257	7.29592	111334	254047	135657	515478	268861			73		M685T7_2	n
1037		1.4247	0.510659	1.66402	0.231088	0.388317	UP	248.961	248.96	248.961	1.68536	1.67758	1.71985	31721468	1.85787e+08	1.38902e+07	2.64692e+08	8.09469e+07	[71][M]-		5		M249T2_2	n
1038		1.56554	0.646659	1.61693	0.231189	0.388337	UP	384.936	384.936	384.937	1.70165	1.67845	1.73488	15328244	6.563e+07	1.04594e+07	1.02746e+08	3.83583e+07	[169][M]-		5		M385T2_1	n
1039		1.84533	0.88388	1.61876	0.231301	0.388359	UP	606.742	606.742	606.743	7.04481	6.97705	7.25283	73084.2	231120	54107.6	426493	201922			94		M607T7	n
1040		3.85923	1.94831	1.69079	0.231745	0.388446	UP	214.053	214.053	214.053	9.35153	9.14318	9.57572	805054	3.31625e+06	676651	1.27982e+07	9.68977e+06	[61][M+1]-		4		M214T9	n
1041		27.0052	4.75516	1.69556	0.232003	0.388497	UP	132.012	132.012	132.013	6.33688	6.31178	6.49133	119644	15937.9	6234.57	430405	423341			178		M132T6_2	n
1042		5.09439	2.34891	1.67601	0.232129	0.388522	UP	485.284	485.283	485.284	2.16083	2.1481	2.21995	3.61373e+06	746059	382401	3.80071e+06	3.13354e+06	[194][M]-		77		M485T2_2	y
1043		2.01977	1.01419	1.46626	0.232524	0.388599	UP	230.104	230.103	230.104	1.4522	1.4329	1.51971	25620.7	67192.7	40980.5	135714	69801.1			7		M230T1	y
1044		3.55301	1.82904	1.69296	0.23254	0.388602	UP	304.003	304.003	304.004	17.2388	17.0197	17.4918	127128	638565	2356.66	2.26883e+06	1.66791e+06			201		M304T17	n
1045		1.50993	0.594478	1.40677	0.232613	0.388616	UP	341.922	341.922	341.922	4.48708	4.45948	4.51468	266377	2.13795e+06	912949	3.22814e+06	983988			100		M342T4	n
1046		1.89814	0.924584	1.49679	0.232658	0.388625	UP	566.584	566.583	566.585	6.69198	6.63513	6.70315	186217	1.15048e+06	538581	2.18378e+06	1.06754e+06			43		M567T7_1	n
1047		2.5194	1.33308	1.59039	0.232706	0.388634	UP	499.637	499.637	499.637	6.60388	6.58672	6.62103	33472	33003.1	16187.1	83147.9	52157.2	[195][M+1]-		12		M500T7	n
1048		2.11551	1.081	1.63971	0.232777	0.388648	UP	104.954	104.954	104.954	2.12228	2.11297	2.13158	125946	331352	79778.4	700979	382203			28		M105T2	n
1049		1.38164	-0.466386	-1.68445	0.232919	0.388676	DOWN	284.916	284.916	284.917	22.4282	22.2803	22.5888	92040.8	468255	132672	338912	9316.26			24		M285T22	y
1050		1.98661	-0.990312	-1.41599	0.233724	0.388831	DOWN	188.906	188.905	188.906	55.9757	55.6912	56.1473	235112	3.5736e+06	1.33523e+06	1.79857e+06	1.71213e+06			282		M189T56_2	n
1051		2.59487	-1.37566	-1.62625	0.233884	0.388862	DOWN	113.036	113.036	113.036	1.3367	1.24051	1.4329	76523976	2.42837e+08	3.50754e+07	9.35833e+07	1.55045e+08		[M-H-CH4]- 130.068	9		M113T1	y
1052		2.15817	-1.10981	-1.45953	0.233993	0.388883	DOWN	656.888	656.887	656.889	2.77913	2.63968	2.96108	636082	8.3114e+06	4.55911e+06	3.85113e+06	2.68914e+06			219		M657T3_1	n
1053		2.54782	1.34926	1.62786	0.234014	0.388887	UP	185.028	185.028	185.028	4.06662	3.96032	4.14393	16176.6	41311.4	14701.4	105254	66428			276		M185T4	n
1054		1.58661	0.665947	1.58391	0.234198	0.388923	UP	276.833	276.833	276.833	6.95285	6.8879	7.15037	1.0659e+06	7.70317e+06	1.4602e+06	1.22219e+07	4.72072e+06		[2M-2H+Na]- 127.939	147		M277T7_1	n
1055		6.19581	2.63129	1.63163	0.234561	0.388992	UP	626.877	626.877	626.877	1.72172	1.7088	1.73463	44607.1	32556.9	36366.3	201716	175849			5		M627T2	n
1056		2.52133	-1.33419	-1.47902	0.234912	0.38906	DOWN	724.877	724.877	724.878	3.42145	3.20352	3.5804	839641	9.78138e+06	6.11811e+06	3.87945e+06	3.21555e+06			74		M725T3	n
1057		5.7797	2.53099	1.60911	0.234942	0.389066	UP	827.568	827.567	827.568	1.4329	1.42104	1.43394	363112	204311	256432	1.18086e+06	1.0194e+06	[262][M+1]-		9		M828T1	n
1058		1.52352	0.607405	1.60441	0.235221	0.389119	UP	198.075	198.075	198.075	5.27973	5.19427	5.39475	81130	804913	113853	1.2263e+06	440431			22		M198T5_2	n
1059		1.93472	-0.952128	-1.40608	0.235336	0.389141	DOWN	469.914	469.913	469.915	4.45948	4.37488	4.56602	112745	670067	309914	346337	250955			100		M470T4	y
1060		1.89375	-0.921248	-1.61836	0.235573	0.389186	DOWN	153.019	153.019	153.02	48.4975	48.4897	48.5282	14931.4	178901	19922.6	94204.7	88430.4			91		M153T48_2	y
1061		5.82182	2.54147	1.64156	0.235602	0.389191	UP	827.747	827.747	827.747	7.08533	7.0683	7.10235	21972.6	6961.77	6162.36	41805.9	36244.9		[M+Cl+CF3COOH]- 658.785 [M-H+NH3]- 811.718 [M-H]- 828.748	73		M828T7	n
1062		5.51686	2.46385	1.60411	0.235626	0.389196	UP	826.564	826.564	826.565	1.4329	1.42104	1.43394	832799	450863	543508	2.48735e+06	2.13069e+06	[262][M]-	[M-2H+Na]- 805.583	9		M827T1	y
1063		1.87361	0.905819	1.58784	0.235813	0.389231	UP	666.699	666.698	666.7	7.03777	6.97705	7.23647	121006	238816	62668	447448	218781			94		M667T7	n
1064		1.3271	-0.408278	-1.46044	0.235895	0.389247	DOWN	129.976	129.976	129.976	4.48136	4.34095	4.60313	738705	7.14189e+06	1.02701e+06	5.38157e+06	1.81763e+06			100		M130T4	n
1065		1.86535	-0.899449	-1.48233	0.235952	0.389258	DOWN	172.098	172.098	172.098	55.5032	55.409	55.6187	977980	1.5971e+07	3.91292e+06	8.56167e+06	7.7229e+06			158		M172T56_1	y
1066		2.00045	1.00032	1.6637	0.23598	0.389263	UP	334.792	334.792	334.792	6.61828	6.53293	6.63993	186902	727566	69979.4	1.45546e+06	754558			12		M335T7_2	n
1067		1.34534	-0.427972	-1.66231	0.236097	0.389286	DOWN	296.944	296.944	296.944	17.4198	17.4175	17.4222	47589.2	569277	151563	423147	14559.3	[108][M+1]-		3		M297T17	n
1068		1.63282	0.707362	1.59028	0.236654	0.389391	UP	453.927	453.926	453.928	1.72204	1.6939	2.0588	859059	3.07236e+06	558541	5.01659e+06	2.04257e+06	[186][M+1]-		5		M454T2	n
1069		2.43839	1.28593	1.62933	0.236999	0.389456	UP	235.076	235.076	235.076	6.58722	6.52772	6.59247	33046	33638.3	9274.55	82023.5	50592.5			12		M235T7	y
1070		1.29636	0.374464	1.63367	0.237	0.389456	UP	114.99	114.99	114.99	1.68547	1.6499	1.70803	1.14571e+06	9.32915e+06	497541	1.20939e+07	2.88872e+06	[6][M+2]-		5		M115T2_2	n
1071		1.15588	-0.208986	-1.46491	0.237007	0.389457	DOWN	392.839	392.838	392.839	28.1328	28.0892	28.1763	50356.6	874079	66261	756205	122611			364		M393T28	y
1072		4.81992	2.26901	1.66486	0.237011	0.389458	UP	368.037	368.037	368.037	24.6089	24.5927	24.6252	19389.8	26783.2	6223.59	129093	106257		[M+Cl+NaCOOH]- 265.08 [M-H+NaCOOH]- 301.057	103		M368T25	y
1073		6.47781	2.69551	1.658	0.237084	0.389472	UP	450.941	450.941	450.941	24.1872	24.1583	24.216	32449.6	25997.2	13726.8	168405	148133			102		M451T24	y
1074		1.91902	0.940369	1.61685	0.237165	0.389487	UP	356.01	356.009	356.011	6.53292	6.49948	6.61828	92996.5	100170	20375.6	192227	96489.3	[153][M+3]-		12		M356T7_4	n
1075		1.9926	0.994649	1.39273	0.237293	0.389511	UP	224.903	224.903	224.904	5.28312	4.95343	5.37795	221097	1.26266e+06	1.02681e+06	2.51597e+06	1.17265e+06			22		M225T5_1	n
1076		1.68916	0.756306	1.51233	0.237312	0.389515	UP	413.968	413.968	413.969	6.53292	6.51363	6.59553	53592.3	73539.9	22723.4	124221	53411	[176][M+3]-		12		M414T7_2	n
1077		1.77597	0.828609	1.40987	0.237611	0.389571	UP	209.046	209.046	209.046	6.20323	6.14155	6.26872	23787.2	47426.9	26663.6	84228.9	36512.6			42		M209T6_2	y
1078		7.18616	2.84522	1.59854	0.23763	0.389575	UP	664.419	664.419	664.419	1.339	1.33224	1.34577	31995.6	7188.81	12451.4	55197.7	50506.4			9		M664T1	y
1079		2.68971	1.42745	1.61822	0.237943	0.389633	UP	380.715	380.714	380.715	2.09908	2.08132	2.11685	3.98643e+06	1.71282e+07	6.04698e+06	4.607e+07	3.03817e+07			28		M381T2_1	n
1080		6.19019	2.62998	1.56556	0.238129	0.389668	UP	876.582	876.581	876.582	1.40442	1.40341	1.40544	95198.3	28857.1	49982	181642	161474		[M+Cl+HCOOH]- 795.616 [M-H+HCOOH]- 831.599	9		M877T1	n
1081		6.78296	2.76192	1.66189	0.238275	0.389695	UP	211.002	211.001	211.002	20.6733	20.4442	20.8758	322623	352179	52231	2.38882e+06	2.12198e+06			39		M211T21	y
1082		1.18171	0.240878	1.49805	0.23857	0.38975	UP	276.799	276.799	276.799	19.2243	19.1293	19.3192	8424725	1.34809e+08	1.15132e+07	1.59305e+08	2.5877e+07			40		M277T19	n
1083		1.54434	-0.626991	-1.57054	0.238582	0.389752	DOWN	282.907	282.907	282.907	6.19427	6.16678	6.24583	61824	573534	213820	371378	63130.5			42		M283T6_3	n
1084		1.63041	0.705233	1.65782	0.238867	0.389805	UP	704.819	704.818	704.821	7.15438	7.09763	7.3979	288565	1.1496e+06	28194.3	1.87431e+06	756640	[238][M]-	[M-H+HCOOH]- 659.827	73		M705T7_3	n
1085		1.2029	0.266517	1.39235	0.239269	0.38988	UP	503.037	503.036	503.038	20.1932	20.136	20.3002	16364.8	112058	22027.5	134794	17741.3			228		M503T20	n
1086		1.26082	-0.334367	-1.52278	0.239482	0.389919	DOWN	617.76	617.76	617.761	5.55517	5.49825	5.5662	25035.2	218837	18455.6	173566	48070.8	[222][M+1]-		21		M618T6	n
1087		1.4495	0.535557	1.4875	0.239675	0.389955	UP	356.847	356.846	356.847	7.00291	6.96173	7.19343	521571	3.14694e+06	686227	4.5615e+06	1.49735e+06			94		M357T7_1	n
1088		1.4428	0.528868	1.45945	0.239843	0.389986	UP	189.041	189.04	189.041	6.5273	6.48522	6.61828	90295.2	144474	35286.1	208446	67223		[M-2H+K]- 152.086	12		M189T7_2	y
1089		1.90369	-0.928799	-1.39147	0.239889	0.389994	DOWN	142.996	142.996	142.996	35.05	34.9605	35.1332	279752	7.38547e+06	2.71542e+06	3.87929e+06	3.41677e+06			267		M143T35	n
1090		1.73769	-0.79717	-1.4027	0.239992	0.390013	DOWN	113.989	113.989	113.989	4.28388	4.2703	4.29745	866242	7.04829e+06	2.99561e+06	4.05613e+06	2.1627e+06			62		M114T4	n
1091		1.53991	-0.622848	-1.60975	0.240185	0.390049	DOWN	127.897	127.897	127.898	6.99387	6.93172	7.16977	29907.2	185091	13227.8	120196	68561			94		M128T7_1	n
1092		2.0885	1.06247	1.51073	0.240522	0.390111	UP	365.882	365.882	365.883	7.03865	7.00745	7.29592	36735.3	124959	57881.2	260977	144805	[156][M+1]-		94		M366T7	n
1093		1.81351	0.858786	1.56797	0.24071	0.390145	UP	676.73	676.73	676.732	7.04465	7.00745	7.26682	130893	318231	77186.9	577115	275361			94		M677T7_2	n
1094		3.56237	1.83284	1.53756	0.240814	0.390164	UP	204.088	204.088	204.088	1.44255	1.4329	1.4522	18505.8	19797.8	18475.4	70527	54077.3			114		M204T1	y
1095		1.2887	-0.365914	-1.58077	0.241164	0.390228	DOWN	299.951	299.951	299.952	7.03777	6.96173	7.23647	46464.6	212993	12617.8	165278	50736.4			94		M300T7_2	n
1096		1.6146	0.691178	1.51885	0.241239	0.390242	UP	132.962	132.962	132.962	5.54407	5.51275	5.55517	19806.6	142453	35160.3	230004	93445	[20][M+4]-		21		M133T6	n
1097		2.80135	-1.48612	-1.44255	0.241291	0.390252	DOWN	240.995	240.994	240.995	52.3943	52.3615	52.4403	155091	4.59247e+06	3.0997e+06	1.63911e+06	1.72231e+06			179		M241T52	y
1098		2.3697	1.24471	1.44935	0.241357	0.390264	UP	592.676	592.675	592.677	6.99387	6.94663	7.20757	50035.5	83113.1	64263.2	196953	119910			94		M593T7	n
1099		3.4434	1.78383	1.54322	0.242164	0.39041	UP	302.101	302.101	302.101	4.04886	4.0109	4.08682	254484	2.18587e+06	1.81529e+06	7.52684e+06	5.71303e+06			276		M302T4	y
1100		4.90303	2.29367	1.62467	0.242176	0.390413	UP	486.287	486.286	486.287	2.18405	2.13355	2.21995	1.02896e+06	205532	103447	1.00773e+06	848938	[194][M+1]-		77		M486T2_2	n
1101		2.33038	1.22056	1.58791	0.242262	0.390428	UP	801.853	801.852	801.855	1.70013	1.66396	1.72423	77527.2	142129	44532.3	331215	201385			5		M802T2	n
1102		1.9351	0.952409	1.38519	0.242309	0.390437	UP	175.081	175.081	175.081	0.265613	0.124503	0.376523	105942	1.27798e+06	1.18042e+06	2.47354e+06	917291			90		M175T0	y
1103		2.34438	1.2292	1.51488	0.242683	0.390504	UP	286.772	286.772	286.772	6.58161	6.54218	6.62103	105002	294596	157716	690645	424473		[3M-H]- 95.9277	12		M287T7_1	n
1104		2.03705	1.02648	1.58825	0.24273	0.390513	UP	169.012	169.012	169.012	2.12976	2.11297	2.14655	60105	396234	94262.2	807151	438095			28		M169T2	n
1105		21.6445	4.43593	1.63755	0.243012	0.390563	UP	338.048	338.048	338.048	10.1709	10.1195	10.2223	85609.7	27396.7	15134.4	592987	598038	[140][M+1]-		31		M338T10	n
1106		9.87822	3.30425	1.60196	0.243026	0.390566	UP	855.601	855.601	855.601	1.41917	1.40544	1.4329	86278.8	17525.2	30354.6	178080	170919	[270][M+1]-		9		M856T1	n
1107		1.80245	0.849956	1.54786	0.243082	0.390576	UP	548.782	548.782	548.784	7.05825	6.97705	7.22208	151197	566587	146020	1.02124e+06	487353			94		M549T7	n
1108		1.92894	0.947807	1.45	0.243438	0.39064	UP	552.776	552.776	552.777	7.03152	6.99227	7.26682	90203.6	286711	145097	553048	283131			94		M553T7	n
1109		1.76264	0.817739	1.63263	0.243876	0.390719	UP	147.03	147.03	147.03	23.2446	23.21	23.3193	610980	1.16722e+06	31103.4	2.05739e+06	943864		[2M-H+Cl]2- 130.055	105		M147T23	y
1110		1.77232	0.82564	1.55203	0.243881	0.39072	UP	474.761	474.76	474.762	7.00302	6.91743	7.19343	141914	538121	126417	953722	446247			94		M475T7_1	n
1111		5.41133	2.43598	1.56585	0.24478	0.39088	UP	762.562	762.561	762.563	6.93063	6.87285	6.98842	12143.3	4520.17	5542.73	25627.2	22679.9		[M+Cl+CF3COOH]- 593.608 [M-H+CF3COOH]- 629.586	147		M763T7_1	y
1112		1.63386	0.708283	1.49885	0.245152	0.390946	UP	798.421	798.421	798.422	6.68625	6.64937	6.72313	307456	1.85773e+06	486863	3.03527e+06	1.27067e+06		[M+Cl]- 763.459	43		M798T7	n
1113		1.68845	0.755703	1.51741	0.245562	0.391019	UP	532.719	532.718	532.72	7.07278	6.97467	7.19343	122434	376487	95295.6	635681	280091			73		M533T7_1	n
1114		1.68052	0.748904	1.58748	0.246106	0.391115	UP	330.868	330.868	330.868	2.09417	2.07915	2.12688	359319	1.87829e+06	242732	3.15649e+06	1.37333e+06			28		M331T2_1	n
1115		6.50791	2.70219	1.60215	0.246168	0.391126	UP	424.928	424.928	424.929	1.72367	1.7094	1.73463	60903.4	50972.1	39680.5	331722	300908			5		M425T2	n
1116		1.26831	-0.342906	-1.36139	0.246403	0.391167	DOWN	161.046	161.046	161.046	23.7401	23.7103	23.811	549214	3.71603e+06	756329	2.92991e+06	654429	[32][M]-		225		M161T24_2	y
1117		1.79829	0.846627	1.58869	0.246514	0.391186	UP	334.792	334.792	334.792	6.94511	6.85775	7.10713	212959	1.67463e+06	241518	3.01147e+06	1.43733e+06		[M+Cl]- 299.829	147		M335T7_1	n
1118		1.5979	0.676181	1.42261	0.246514	0.391186	UP	754.748	754.746	754.749	7.09253	7.03788	7.31025	102527	246325	87051	393604	156767		[M+Cl+CF3COOH]- 585.795 [M+Cl+NaCOOH]- 651.786	73		M755T7	n
1119		5.28838	2.40283	1.60104	0.246517	0.391187	UP	288.953	288.953	288.953	1.73463	1.72367	1.75362	79866.3	90167.9	53870.2	476843	414832			341		M289T2	n
1120		1.71653	0.779492	1.51837	0.24659	0.3912	UP	626.802	626.801	626.803	7.09375	7.03788	7.32473	185882	715624	182700	1.22839e+06	555659		[M+Cl+NaCOOH]- 523.844	73		M627T7_3	n
1121		1.27627	0.351937	1.44879	0.246633	0.391207	UP	172.098	172.098	172.098	8.80417	8.52087	9.08472	911337	9.11597e+06	2.71066e+06	1.16345e+07	1.31066e+06			175		M172T9_2	y
1122		1.69472	0.761046	1.60658	0.246649	0.39121	UP	114.99	114.99	114.99	7.24035	7.15655	7.4078	678060	1.94817e+07	1.5497e+06	3.3016e+07	1.45087e+07			25		M115T7_2	n
1123		1.99997	0.999981	1.36785	0.246712	0.391221	UP	186.077	186.077	186.078	1.44747	1.41827	1.5182	105948	567487	445540	1.13496e+06	563764			7		M186T1	y
1124		1.67354	0.742904	1.522	0.246722	0.391223	UP	691.635	691.634	691.637	6.57046	6.5197	6.62507	53124.2	79113.1	18477.6	132399	57756	[235][M]-	[M-2H+K]- 654.674 [M-H]- 692.644 [M-H-CO]- 720.626	12		M692T7_1	n
1125		3.73198	1.89994	1.58725	0.246871	0.391249	UP	294.945	294.945	294.945	2.13158	2.09605	2.16482	26507.2	41271.6	20298.1	154024	121353			28		M295T2	y
1126		1.82274	-0.866108	-1.58337	0.246931	0.39126	DOWN	114.936	114.936	114.937	51.1793	51.1703	51.1883	23908.3	201155	17383.5	110094	98083			95		M115T51	n
1127		3.01606	1.59267	1.47118	0.246983	0.391269	UP	248.843	248.843	248.844	5.30772	5.2115	5.37795	1.19931e+06	5.97185e+06	5.5686e+06	1.80115e+07	1.30348e+07			22		M249T5_1	n
1128		1.90552	0.930181	1.46509	0.247207	0.391308	UP	377.908	377.908	377.909	7.13128	7.08237	7.19373	30930.7	116215	50016.3	221450	113914	[166][M+3]-		73		M378T7	n
1129		2.217	1.14861	1.50047	0.247432	0.391347	UP	658.667	658.666	658.668	7.01778	6.94663	7.20757	96209.5	151094	71732.7	334974	199773			94		M659T7	n
1130		1.66324	0.733994	1.5298	0.247437	0.391348	UP	696.788	696.787	696.789	7.11982	7.0683	7.32473	146014	545290	116463	906947	392559	[236][M+2]-		73		M697T7_2	n
1131		1.28464	0.361367	1.35976	0.247925	0.391433	UP	740.85	740.849	740.851	2.00325	1.98132	2.16975	512389	3.0169e+06	695606	3.87563e+06	844182			213		M741T2_2	n
1132		1.51376	0.598134	1.60417	0.247976	0.391442	UP	444.892	444.891	444.893	7.16817	7.09763	7.3979	501645	3.29915e+06	161861	4.99411e+06	1.82291e+06	[184][M+2]-		73		M445T7_2	n
1133		2.32785	-1.219	-1.39363	0.248078	0.39146	DOWN	323.972	323.972	323.973	59.5438	59.1995	59.9282	173606	2.78568e+06	1.66958e+06	1.19641e+06	1.05543e+06			301		M324T60	y
1134		1.48677	0.572181	1.44939	0.248744	0.391575	UP	414.962	414.962	414.963	6.53392	6.51363	6.62507	228237	502176	122428	746620	265222	[176][M+4]-		12		M415T7_2	n
1135		1.65693	0.728517	1.42006	0.249048	0.391628	UP	734.688	734.687	734.689	7.04465	6.97705	7.23647	56586.9	154966	58560.5	256768	109491			94		M735T7_1	n
1136		1.79241	0.841901	1.42934	0.249054	0.391629	UP	668.697	668.695	668.698	7.02427	6.96173	7.25283	106004	202273	88148.8	362556	173074			94		M669T7	n
1137		1.80838	-0.854701	-1.43377	0.24912	0.39164	DOWN	174.956	174.956	174.957	37.29	37.2533	37.3262	923297	2.4548e+07	5.89974e+06	1.35743e+07	1.18715e+07			171		M175T37_1	n
1138		6.16574	2.62427	1.54015	0.249414	0.391691	UP	599.921	599.92	599.921	6.45208	6.44032	6.50667	166953	34551.8	49460.2	212773	194229			6		M600T6_1	n
1139		1.62812	0.703211	1.51649	0.249456	0.391698	UP	432.866	432.866	432.867	7.08675	7.03788	7.29592	776380	3.59865e+06	755946	5.85905e+06	2.46855e+06		[M+Cl]- 397.901	73		M433T7	n
1140		23.4546	4.5518	1.60467	0.249458	0.391698	UP	427.014	427.014	427.014	10.2364	10.2077	10.2652	50036.7	10909.5	9780.09	262085	270938			31		M427T10	y
1141		4.11464	2.04077	1.55041	0.249803	0.391757	UP	447.135	447.134	447.135	2.93748	2.90263	2.93942	20993.3	21856.1	16818.3	89930.2	74166.3			277		M447T3	y
1142		1.86883	-0.902134	-1.37946	0.250161	0.391819	DOWN	173.007	173.007	173.007	48.1718	48.1325	48.181	216738	2.93356e+06	942191	1.56947e+06	1.43031e+06			185		M173T48_3	y
1143		1.13888	0.187612	1.51716	0.25036	0.391853	UP	248.843	248.843	248.843	14.4351	14.4138	14.4564	725197	8.31631e+06	374514	9.47126e+06	1.26422e+06			52		M249T14_3	n
1144		2.19437	1.13381	1.54064	0.250435	0.391866	UP	628.581	628.581	628.583	6.93202	6.91798	7.10173	70100.1	216051	68503.6	474097	281902		[M+Cl]- 593.608 [M-H]- 629.586	147		M629T7_1	y
1145		193.242	7.59426	1.60105	0.250515	0.391879	UP	349.081	349.081	349.081	10.3877	10.3527	10.4226	26261.4	0	0	153375	165924			117		M349T10_2	y
1146		1.65854	-0.729912	-1.50908	0.250696	0.39191	DOWN	215.037	215.037	215.037	17.4052	17.1488	17.7625	62440.9	858297	373542	517502	116031			106		M215T17	n
1147		1.22601	0.293974	1.53804	0.250991	0.39196	UP	113.989	113.989	113.989	2.16482	2.11297	2.19065	1.17333e+06	1.42097e+07	854781	1.74213e+07	3.51424e+06			77		M114T2_3	n
1148		2.1565	1.10869	1.38653	0.251123	0.391983	UP	184.864	184.864	184.864	6.62797	6.48522	6.70315	356587	863346	655250	1.8618e+06	1.06129e+06		[M-2H+Na]- 163.896	12		M185T7_1	n
1149		1.48336	0.568864	1.34523	0.251178	0.391992	UP	327.907	327.907	327.907	4.48003	4.45948	4.50058	1.22762e+06	9.66625e+06	3.92894e+06	1.43385e+07	4.55552e+06			100		M328T4	n
1150		1.81301	0.85839	1.42377	0.251297	0.392012	UP	562.807	562.806	562.808	7.07886	7.03788	7.28143	68059.6	220320	97642.8	399444	194808		[M+Cl+NaCOOH]- 459.845 [M-H+NaCOOH]- 495.822	73		M563T7_2	n
1151		4.09916	2.03533	1.56734	0.251306	0.392014	UP	226.816	226.816	226.816	6.53293	6.51363	6.60672	70737.3	46375.6	25754.3	190101	156727		[2M+Cl]- 95.9277	12		M227T7	n
1152		1.33577	0.417667	1.53332	0.251322	0.392016	UP	174.078	174.078	174.078	1.36049	1.31523	1.40575	1.46531e+06	2.88458e+07	2.66079e+06	3.85313e+07	1.06123e+07	[38][M]-	[M-H-CH2]- 189.1	9		M174T1	y
1153		1.82296	0.866284	1.54181	0.251353	0.392022	UP	480.796	480.795	480.796	7.03116	6.96173	7.22208	193391	758262	157462	1.38228e+06	683103			94		M481T7	n
1154		67.2753	6.072	1.59598	0.251516	0.392049	UP	271.004	271.004	271.004	6.50922	6.44177	6.6103	265249	4346.76	4409.23	310228	331931		[M-H-C4H8]- 328.073	68		M271T7_2	y
1155		1.81314	0.858492	1.5604	0.251569	0.392059	UP	460.739	460.737	460.739	6.99387	6.8879	7.17893	89060.4	361322	57957.6	655128	320934			94		M461T7_2	n
1156		1.31672	0.396944	1.54725	0.251586	0.392061	UP	695.86	695.86	695.861	1.72423	1.6939	1.76345	36613.2	182714	13598.7	240582	63336.5			5		M696T2	n
1157		1.40175	0.487233	1.4981	0.251683	0.392078	UP	355.006	355.006	355.007	6.53794	6.49948	6.62507	726025	2.09253e+06	300661	2.93322e+06	924302	[153][M+2]-		12		M355T7_3	n
1158		1.94648	-0.960866	-1.36412	0.252283	0.392179	DOWN	371.991	371.991	371.991	17.9563	17.9338	17.9788	39094.7	344274	121249	176870	174583		[M+Cl+NaCOOH]- 269.033	37		M372T18_2	y
1159		1.83724	0.87754	1.46923	0.25245	0.392207	UP	198.918	198.918	198.918	22.5942	22.5665	22.622	298629	4.5018e+06	1.58385e+06	8.27089e+06	4.15143e+06			16		M199T23_1	n
1160		1.46014	0.546108	1.43161	0.252574	0.392228	UP	292.924	292.923	292.924	22.6058	22.4393	22.7637	2.41819e+06	2.7747e+07	6.55228e+06	4.05145e+07	1.39884e+07			16		M293T23_1	n
1161		1.71396	0.777333	1.56802	0.252787	0.392264	UP	290.856	290.856	290.856	6.99844	6.91743	7.19343	378155	2.48117e+06	272187	4.25262e+06	1.93774e+06			94		M291T7_2	n
1162		1.61431	0.690916	1.3553	0.252874	0.392278	UP	327.907	327.907	327.907	5.27225	5.21112	5.39475	1.15709e+06	7.76882e+06	3.59866e+06	1.25413e+07	4.92429e+06			22		M328T5	n
1163		1.32578	0.406842	1.39898	0.253226	0.392337	UP	332.922	332.922	332.923	2.09278	2.05793	2.11685	1.90242e+06	1.95397e+07	3.80201e+06	2.59054e+07	6.9035e+06	[137][M]-		28		M333T2_1	y
1164		5.89104	2.55852	1.57798	0.253649	0.392408	UP	122.985	122.985	122.985	1.47257	1.46178	1.48335	24322.6	10855.2	4826.47	63948.2	58076.6			7		M123T1	y
1165		1.79299	0.842368	1.5122	0.253715	0.392419	UP	796.424	796.424	796.424	6.68492	6.67787	6.69198	554745	3.23928e+06	779672	5.808e+06	2.83699e+06		[3M+2Cl]2- 507.635	43		M796T7	n
1166		1.92052	0.9415	1.4929	0.254064	0.392477	UP	756.746	756.743	756.746	7.10005	7.07168	7.29592	43822.8	70989.5	22746.4	136337	72323.2		[M+Cl+NaCOOH]- 653.784	73		M757T7	n
1167		1.5327	0.616077	1.49017	0.254119	0.392487	UP	341.041	341.04	341.041	20.4713	20.422	20.5468	26653.7	104843	19785	160693	61827		[M+Cl+NaCOOH]- 238.084 [M-H+NaCOOH]- 274.06	270		M341T20	y
1168		1.19148	-0.252755	-1.34733	0.254193	0.392499	DOWN	418.029	418.028	418.029	21.325	21.3125	21.518	43430.3	1.3346e+06	220355	1.12012e+06	165733			316		M418T21	y
1169		1.83924	0.879112	1.40569	0.254201	0.3925	UP	194.893	194.892	194.893	2.11137	2.05793	2.15012	5.40054e+06	3.05079e+07	1.45679e+07	5.61115e+07	2.79831e+07			28		M195T2	n
1170		1.63558	0.709804	1.48931	0.254456	0.392543	UP	368.873	368.872	368.873	7.05214	7.02257	7.32473	96110.2	457278	102661	747916	322042			94		M369T7	y
1171		1.51556	0.599856	1.53303	0.254469	0.392545	UP	228.903	228.903	228.903	7.0099	6.94663	7.19343	1.6181e+06	1.23334e+07	1.52827e+06	1.8692e+07	7.01973e+06			94		M229T7_1	n
1172		1.63876	0.712606	1.46869	0.254695	0.392582	UP	346.818	346.817	346.818	6.99042	6.91743	7.19343	357117	2.32508e+06	596526	3.81025e+06	1.64677e+06			94		M347T7_2	n
1173		2.4173	1.2734	1.50364	0.255084	0.392647	UP	430.92	430.92	430.921	2.09605	2.01808	2.10423	36975.2	118648	52360.4	286808	186493			28		M431T2_2	n
1174		1.21118	0.27641	1.44756	0.25569	0.392746	UP	317.952	317.952	317.952	2.07147	2.05218	2.0739	528953	4.92297e+06	462982	5.96259e+06	1.15457e+06	[129][M+1]-		28		M318T2_1	n
1175		1.41514	0.500947	1.51411	0.255763	0.392758	UP	353.009	353.009	353.01	6.53794	6.49948	6.62507	1.22073e+06	3.21315e+06	369769	4.54706e+06	1.48044e+06	[153][M]-	[M-H]- 354.017	12		M353T7	y
1176		1.74129	0.800153	1.48262	0.255992	0.392796	UP	424.834	424.834	424.835	7.03116	6.97705	7.25283	417525	1.80712e+06	476011	3.14672e+06	1.49082e+06			94		M425T7	n
1177		1.61872	0.69485	1.51181	0.256196	0.39283	UP	280.827	280.827	280.828	6.96346	6.8879	7.15037	622032	4.35876e+06	751430	7.0556e+06	2.99695e+06			94		M281T7_1	n
1178		1.94798	0.96198	1.53732	0.256212	0.392832	UP	626.54	626.54	626.541	6.66987	6.66187	6.67787	95939.9	323602	63123.8	630371	339815			12		M627T7_1	n
1179		1.44297	0.529039	1.53047	0.256476	0.392876	UP	318.953	318.952	318.953	1.70165	1.67845	1.73488	420736	2.13266e+06	210808	3.07735e+06	1.04813e+06	[127][M+2]-		5		M319T2_1	n
1180		2.16865	1.1168	1.42971	0.256557	0.392889	UP	243.179	243.179	243.18	5.109	5.07773	5.25292	28875.4	82048.3	46344.7	177934	106517	[69][M+1]-		80		M243T5	n
1181		1.41952	0.505405	1.38543	0.256749	0.39292	UP	103.04	103.04	103.04	5.35447	5.31388	5.39475	2.87891e+06	1.0297e+07	2.61212e+06	1.46167e+07	4.72682e+06			22		M103T5	y
1182		5.89266	2.55892	1.56936	0.256917	0.392948	UP	721.041	721.041	721.043	8.80362	8.62532	8.88327	39528.9	60877.6	9673.18	358731	328588		[M+Cl]- 686.072 [M-H]- 722.049	175		M721T9	n
1183		9.02162	3.17339	1.56661	0.257527	0.393047	UP	145.005	145.005	145.006	9.41618	9.38975	9.69185	151231	47847.4	11689.3	431662	424185			4		M145T9_1	n
1184		1.83176	-0.873234	-1.34099	0.257657	0.393068	DOWN	228.995	228.994	228.995	59.6115	59.5128	59.6328	29936.5	461076	158019	251447	219869			390		M229T60_2	y
1185		1.70635	0.77091	1.51333	0.257679	0.393072	UP	550.779	550.779	550.78	7.04481	6.97705	7.23647	225477	773826	141009	1.32042e+06	609488			94		M551T7	n
1186		4.76825	2.25346	1.48517	0.25793	0.393112	UP	850.566	850.566	850.567	1.41901	1.40544	1.4329	1.02574e+06	656394	816694	3.12985e+06	2.7666e+06	[269][M]-	[M-H+HCOOH]- 805.583	9		M851T1	n
1187		1.80393	-0.85114	-1.46734	0.257965	0.393118	DOWN	196.911	196.911	196.911	51.1275	51.0955	51.1433	27953.6	169302	28403.4	93587.5	84740			95		M197T51	y
1188		2.59873	1.37781	1.54581	0.258048	0.393131	UP	148.033	148.033	148.033	23.2372	23.2292	23.2453	27655.1	17140.9	4049.04	44544.5	30437.2	[28][M+2]-		105		M148T23	n
1189		1.68074	0.749093	1.32278	0.258165	0.39315	UP	835.846	835.845	835.846	1.67912	1.67758	1.72423	84134	157346	90818.7	264458	106877	[266][M+1]-		5		M836T2	n
1190		1.94253	0.957939	1.52408	0.25834	0.393179	UP	719.615	719.615	719.616	6.54673	6.5064	6.63993	85346.9	103914	21405.1	201855	109229		[M+Cl]- 684.652 [M-H]- 720.626	12		M720T7_1	n
1191		1.92184	-0.942488	-1.33667	0.258467	0.393199	DOWN	104.044	104.035	104.044	58.3662	58.0585	58.636	23576.4	395933	145011	205753	199252			399		M104T58_1	n
1192		4.43064	2.14751	1.4404	0.25859	0.393219	UP	801.552	801.552	801.553	1.45699	1.4522	1.46178	62931.8	46647	69942.4	206411	178929	[257][M+1]-		7		M802T1	n
1193		1.84367	-0.88258	-1.33535	0.258737	0.393243	DOWN	142.996	142.996	142.997	32.0688	32.0252	32.082	281094	4.53602e+06	1.58799e+06	2.46006e+06	2.17459e+06			264		M143T32_2	n
1194		1.91529	-0.937562	-1.39852	0.259295	0.393332	DOWN	348.896	348.896	348.897	6.12735	5.82592	6.29733	180987	1.98252e+06	1.05451e+06	1.0351e+06	514581			196		M349T6	n
1195		13.2528	3.72823	1.55097	0.25932	0.393336	UP	694.866	694.866	694.866	1.72915	1.72367	1.73463	44691.2	15446	18005.4	204439	210289			5		M695T2	n
1196		1.79926	0.847403	1.49447	0.259629	0.393386	UP	340.783	340.783	340.783	6.87424	6.5766	6.9307	79890.9	578993	133354	1.04176e+06	519489			14		M341T7	n
1197		2.00971	-1.00699	-1.52497	0.259658	0.393391	DOWN	362.715	362.715	362.715	49.9958	49.971	50.098	633522	4.91463e+06	488452	2.44518e+06	2.76193e+06			140		M363T50	n
1198		1.98367	-0.988172	-1.31355	0.259758	0.393407	DOWN	344.981	344.981	344.981	49.1572	48.9143	49.244	77727.9	1.08712e+06	524145	547772	480689	[148][M+1]-		34		M345T49	n
1199		1.64032	0.713979	1.47155	0.259906	0.39343	UP	492.821	492.821	492.822	7.05194	7.00745	7.26682	287472	1.32207e+06	292815	2.16862e+06	952418			94		M493T7	n
1200		1.72508	0.786663	1.46516	0.260079	0.393458	UP	790.433	790.433	790.433	6.69384	6.64937	6.73832	193424	1.10051e+06	287834	1.89847e+06	898328		[3M+2Cl]2- 503.641 [3M-2H]2- 527.623 [M+Cl]- 755.463	43		M790T7	n
1201		2.26811	1.18149	1.48888	0.260305	0.393494	UP	566.779	566.779	566.78	2.08498	2.05793	2.11685	36839	77407.9	29062.9	175570	110434			28		M567T2	n
1202		1.79539	0.844298	1.54988	0.260305	0.393494	UP	656.888	656.887	656.889	1.72254	1.6939	1.77618	2.98405e+06	9.89555e+06	566213	1.77664e+07	8.7777e+06	[228][M]-		5		M657T2	n
1203		2.27127	1.1835	1.4644	0.260454	0.393518	UP	266.814	266.814	266.815	6.23243	6.21975	6.33688	83035.5	255111	116458	579426	365485			42		M267T6_1	n
1204		1.77415	-0.827131	-1.53822	0.260652	0.393549	DOWN	259.005	259.005	259.005	53.9402	53.9115	54.0285	73633.2	742037	42229.8	417984	362434			344		M259T54	y
1205		1.48316	0.568673	1.43752	0.260662	0.393551	UP	161.065	161.065	161.065	1.42697	1.42104	1.4329	45977.3	147066	30307.1	218122	80070.5		[M+Cl]- 126.097 [M-H-COCH2]- 204.088	9		M161T1_2	y
1206		1.64262	0.715996	1.46672	0.261125	0.393624	UP	570.839	570.838	570.84	7.14732	7.0683	7.33935	328233	1.2646e+06	281602	2.07726e+06	917417	[212][M+2]-		73		M571T7_2	n
1207		1.75446	0.811024	1.48852	0.261133	0.393626	UP	706.49	706.49	706.49	6.68534	6.66367	6.70702	168024	986255	214398	1.73034e+06	838858		[3M-2H]2- 471.66	43		M706T7_2	n
1208		3.71744	1.89431	1.54493	0.261343	0.393659	UP	237.464	237.464	237.465	6.5197	6.47117	6.55972	160834	97856.1	19558.3	363774	297483			68		M237T7_3	n
1209		4.77387	2.25516	1.53294	0.261491	0.393682	UP	213.15	213.15	213.15	3.29339	3.26713	3.31965	20196.9	19499	10108	93085.7	82527.9			405		M213T3	y
1210		2.69228	1.42883	1.51192	0.261501	0.393684	UP	300.049	300.049	300.049	24.5927	24.4033	24.6252	129409	477151	173509	1.28462e+06	908622		[M+Cl]- 265.08 [M-H]- 301.057	103		M300T25	y
1211		1.17033	0.226914	1.35263	0.261648	0.393707	UP	317.922	317.922	317.923	17.4075	17.3573	17.4633	160468	1.94955e+06	219971	2.28162e+06	363889			106		M318T17_1	n
1212		1.97009	-0.978261	-1.54525	0.26217	0.393789	DOWN	328.911	328.91	328.911	50.5452	50.4867	50.6243	2840670	1.37234e+08	1.8015e+06	6.96585e+07	7.57228e+07	[135][M+1]-		11		M329T51_1	n
1213		1.78058	-0.832345	-1.3817	0.262314	0.393812	DOWN	224.804	224.804	224.804	48.3563	48.3413	48.3672	216001	2.11683e+06	523456	1.18858e+06	1.03924e+06			254		M225T48_1	n
1214		1.63214	0.706762	1.4988	0.262521	0.393844	UP	374.907	374.907	374.908	7.14732	7.0683	7.33935	2424933	1.45217e+07	2.22628e+06	2.37014e+07	1.0372e+07	[166][M]-		73		M375T7_1	n
1215		2.0082	1.0059	1.50975	0.262577	0.393853	UP	346.959	346.959	346.96	2.05218	2.04458	2.11685	125729	676300	141272	1.35815e+06	769382			28		M347T2_2	y
1216		1.65168	0.723931	1.45624	0.262812	0.39389	UP	636.831	636.83	636.832	7.14732	7.08237	7.33935	411210	1.45507e+06	339051	2.40331e+06	1.07566e+06			73		M637T7_2	n
1217		1.76235	-0.817503	-1.41705	0.262968	0.393915	DOWN	211.883	211.883	211.883	16.8823	16.5886	16.9863	140958	3.16305e+06	1.54972e+06	1.79479e+06	628754			93		M212T17	n
1218		2.44817	1.2917	1.367	0.263033	0.393925	UP	646.641	646.641	646.642	6.98769	6.91743	7.20757	57648.3	107276	93463.7	262631	173237			94		M647T7_2	n
1219		4.71546	2.2374	1.46005	0.263405	0.393983	UP	851.57	851.57	851.571	1.42104	1.41901	1.4329	492170	325250	412794	1.5337e+06	1.37287e+06	[269][M+1]-		9		M852T1	n
1220		1.2506	-0.322617	-1.34956	0.263587	0.394011	DOWN	210.867	210.867	210.867	1.56894	1.54984	1.58523	188559	290678	64354.6	232431	38037.1			202		M211T2_2	y
1221		2.04657	1.03321	1.48019	0.263702	0.394029	UP	278.971	278.971	278.972	2.06668	2.00937	2.11685	161919	806330	238906	1.65021e+06	958136			28		M279T2_2	n
1222		3.1687	1.66389	1.41851	0.263849	0.394052	UP	250.841	250.84	250.841	5.30772	5.2115	5.37795	379571	1.73522e+06	1.68443e+06	5.4984e+06	4.27508e+06			22		M251T5	n
1223		1.76356	-0.818493	-1.40084	0.26406	0.394085	DOWN	158.979	158.979	158.979	37.2533	37.219	37.3262	31058	667820	142877	378412	328074			171		M159T37	n
1224		1.53494	0.618181	1.45835	0.264187	0.394105	UP	87.02	87.02	87.02	0.543343	0.541655	0.545032	48507.3	467085	84526.9	716946	284463			218		M87T1_1	n
1225		2.97339	1.57211	1.51387	0.264247	0.394114	UP	462.001	462.001	462.002	2.11685	2.06668	2.11967	37610.5	74467.4	24516.5	221421	166335			28		M462T2	y
1226		1.652	-0.724215	-1.51934	0.264312	0.394124	DOWN	170.046	170.046	170.046	24.4084	24.3887	24.4962	83994.5	869377	48993.1	526256	388077			66		M170T24	y
1227		1.35812	0.441614	1.44312	0.26446	0.394147	UP	274.792	274.792	274.793	6.68139	6.63765	6.84247	339657	3.10632e+06	418743	4.21876e+06	1.26781e+06			43		M275T7	n
1228		1.65488	0.72673	1.50866	0.264745	0.394191	UP	646.799	646.798	646.8	6.53961	6.51363	6.62507	115890	270134	31614.1	447041	200626		[M-2H+K]- 609.838 [M+Cl]- 611.836	12		M647T7_3	n
1229		4.33728	2.11679	1.4808	0.264747	0.394191	UP	763.779	763.778	763.779	7.11405	7.0683	7.11675	36703.1	29656.3	26903.3	129511	113656	[250][M+1]-		73		M764T7_1	n
1230		2.04295	1.03065	1.40944	0.264825	0.394203	UP	242.065	242.065	242.065	7.59863	7.45865	7.66455	153273	1.2942e+06	625213	2.64398e+06	1.5364e+06			60		M242T8	y
1231		1.66122	0.732247	1.49178	0.265092	0.394245	UP	230.9	230.9	230.901	7.00543	6.94663	7.19343	967128	7.75829e+06	1.18878e+06	1.28883e+07	5.8364e+06			94		M231T7_1	n
1232		1.47585	0.561548	1.46553	0.265176	0.394258	UP	384.719	384.719	384.72	6.68049	6.63765	6.84702	2.13089e+06	1.78808e+07	2.62326e+06	2.63894e+07	9.7078e+06		[3M-2H+K]- 115.919	12		M385T7_1	n
1233		1.30023	0.378765	1.38526	0.265441	0.394298	UP	196.947	196.947	196.948	2.10977	2.0653	2.14655	239857	2.32499e+06	366376	3.02302e+06	792149			28		M197T2_2	n
1234		4.68056	2.22668	1.4145	0.265546	0.394314	UP	683.286	683.286	683.286	5.8063	5.78668	5.82592	16810.9	10746.5	18613.5	52776.3	47981.6			41		M683T6	y
1235		3.86995	-1.95232	-1.45759	0.265584	0.39432	DOWN	158.979	158.979	158.979	31.4904	31.2752	31.5608	72921	2.6467e+06	2.24316e+06	683645	640030			345		M159T31_3	n
1236		3.80132	1.9265	1.42233	0.265904	0.39437	UP	800.549	800.549	800.55	1.46178	1.4522	1.46406	119053	113991	133604	433317	365189	[257][M]-		7		M801T1	n
1237		1.95203	-0.964977	-1.31733	0.26615	0.394407	DOWN	692.635	692.634	692.635	6.58346	6.5349	6.63202	27047.9	64057.2	33780.1	32815.7	23371.5	[235][M+1]-		12		M693T7	n
1238		3.27232	-1.71031	-1.46736	0.266259	0.394424	DOWN	134.049	134.049	134.049	6.81934	6.76783	6.93373	1.55168e+06	1.46267e+07	1.16182e+07	4.46983e+06	2.95868e+06		[M-H]- 135.059	110		M134T7	n
1239		1.80244	0.849953	1.47087	0.26631	0.394432	UP	657.891	657.89	657.892	1.71498	1.6939	1.76258	282733	1.03479e+06	232938	1.86515e+06	949656	[228][M+1]-		5		M658T2	n
1240		1.58762	0.666862	1.33664	0.266399	0.394445	UP	139.052	139.052	139.052	16.542	16.4457	16.6382	41942.9	738195	481381	1.17197e+06	290215			143		M139T17	y
1241		1.47323	0.558985	1.29193	0.266828	0.394511	UP	804.653	804.651	804.653	5.54928	5.45523	5.59702	28058.9	162868	77167.2	239943	68720.8	[258][M+4]-		21		M805T6	n
1242		1.67274	0.742217	1.45164	0.266895	0.394521	UP	142.975	142.975	142.975	22.6033	22.463	22.7202	159342	1.80625e+06	399681	3.02139e+06	1.39369e+06			16		M143T23	n
1243		1.72762	0.78879	1.45422	0.266959	0.394531	UP	616.773	616.772	616.774	7.05896	7.00745	7.28143	109032	414629	96856.9	716323	346034			94		M617T7_2	n
1244		1.60255	0.680368	1.30413	0.267105	0.394553	UP	158.926	158.925	158.926	22.6412	22.579	22.763	331295	4.21056e+06	2.02648e+06	6.74762e+06	2.69208e+06			16		M159T23_1	n
1245		1.56776	-0.648701	-1.30551	0.267121	0.394556	DOWN	392.838	392.838	392.839	28.7817	28.514	29.012	41829	495641	142007	316147	191165			324		M393T29_2	y
1246		3.76391	1.91223	1.48203	0.267174	0.394564	UP	884.473	884.472	884.473	1.47208	1.46787	1.47628	25875.6	25829.2	16838.5	97218.8	81716			7		M884T1	n
1247		1.71378	0.777179	1.43276	0.267402	0.394598	UP	394.748	394.747	394.749	6.88524	6.53293	7.12153	215008	1.78132e+06	477820	3.05279e+06	1.46091e+06			14		M395T7	n
1248		2.08237	1.05823	1.46408	0.267412	0.3946	UP	446.027	446.027	446.027	2.05439	2.05218	2.0566	81123.9	361929	112768	753669	449511			28		M446T2	y
1249		4.33326	2.11545	1.51882	0.267576	0.394625	UP	384.089	384.088	384.089	6.53292	6.45685	6.62507	758594	236324	43668.1	1.02405e+06	897261		[M+Cl]- 349.115 [M-2H+Na]- 363.114	12		M384T7	y
1250		1.71068	0.774567	1.46919	0.267687	0.394641	UP	532.875	532.875	532.876	6.53392	6.51363	6.61828	58401.8	95429.8	18277.9	163249	77836.7		[M-2H+K]- 495.915	12		M533T7_2	n
1251		1.91938	0.940643	1.44191	0.267693	0.394642	UP	534.83	534.829	534.831	2.107	2.05135	2.11685	212418	833403	266454	1.59962e+06	880983			28		M535T2	n
1252		1.76381	-0.818699	-1.35082	0.267797	0.394658	DOWN	793.367	793.366	793.369	6.4158	6.39665	6.4665	183866	1.01056e+06	265599	572939	494284		[M-H+NaCOOH]- 726.386	6		M793T6_2	n
1253		4.15046	2.05327	1.44112	0.267885	0.394671	UP	276.799	276.799	276.799	4.31366	4.31147	4.31585	5.14757e+06	1.29712e+07	1.42204e+07	5.38364e+07	4.70113e+07			62		M277T4_2	n
1254		1.70292	0.768015	1.33528	0.267908	0.394675	UP	622.547	622.546	622.548	6.75387	6.67787	6.97748	546014	2.99282e+06	1.3844e+06	5.09655e+06	2.35159e+06		[M-2H+K]- 585.587	19		M623T7	n
1255		129.826	7.02043	1.51951	0.26798	0.394686	UP	886.559	886.558	886.559	2.81711	2.80135	2.83287	48356	427.856	741.069	123977	140829	[279][M+1]-		219		M887T3	n
1256		2.67985	1.42215	1.43928	0.268118	0.394707	UP	599.321	599.321	599.323	5.88057	5.78668	6.07177	108849	248236	146253	665234	480038	[216][M]-		41		M599T6	y
1257		1.18456	-0.244351	-1.37092	0.268295	0.394733	DOWN	158.97	158.97	158.971	1.5657	1.55941	1.57846	37862.2	78206.5	13915.9	66021.6	6583.76			202		M159T2	n
1258		1.16815	0.224231	1.32748	0.268707	0.394795	UP	268.05	268.05	268.05	28.9338	28.8805	28.9872	13787.3	51100.8	5823.69	59693.6	9580.42			407		M268T29	y
1259		1.36237	0.44612	1.32607	0.268708	0.394796	UP	98.9738	98.9737	98.974	22.6058	22.4393	22.7347	444719	5.60975e+06	2.26327e+06	7.64255e+06	1.38835e+06			16		M99T23_1	n
1260		1.7413	0.800164	1.3991	0.268817	0.394812	UP	522.69	522.69	522.691	6.95952	6.91743	7.17893	100382	401740	135465	699549	342892			94		M523T7	n
1261		1.52562	-0.609398	-1.28799	0.26888	0.394822	DOWN	191.108	191.108	191.108	1.57766	1.54984	1.58523	36735.9	73933.1	26101.6	48460.9	22182.4			23		M191T2	y
1262		2.1604	1.1113	1.44911	0.268901	0.394825	UP	346.842	346.842	346.843	2.11137	2.04458	2.14655	71884.2	233422	85275.4	504285	312318			28		M347T2_1	n
1263		4.18376	2.0648	1.4921	0.268977	0.394836	UP	168.044	168.043	168.044	16.2287	16.085	16.2626	447386	853039	471585	3.56891e+06	3.11715e+06			36		M168T16	y
1264		1.83631	0.876813	1.4115	0.269141	0.394861	UP	501.634	501.634	501.634	6.63429	6.60672	6.66187	111324	436396	152347	801361	421139		[M-H-C4H8]- 558.701	12		M502T7_1	n
1265		1.4582	-0.544188	-1.4417	0.269442	0.394906	DOWN	184.864	184.864	184.864	12.8022	12.6772	13.0713	137947	2.30506e+06	836652	1.58076e+06	239200			242		M185T13	n
1266		1.32984	0.411253	1.40772	0.269801	0.39496	UP	114.937	114.936	114.937	14.096	14.0345	14.1135	346181	3.94224e+06	548257	5.24255e+06	1.50302e+06			57		M115T14_1	n
1267		1.14078	0.190023	1.28065	0.270042	0.394996	UP	750.593	750.591	750.595	6.57188	6.55128	6.61828	43098.1	95054.8	13356.5	108437	12213.6		[M-2H+K]- 713.634	12		M751T7	n
1268		1.42743	0.513421	1.49142	0.270431	0.395054	UP	528.882	528.881	528.883	6.53794	6.51363	6.62507	285379	705458	45327.8	1.00699e+06	347238		[M+Cl]- 493.918	12		M529T7_2	n
1269		1.65454	-0.72643	-1.4449	0.270436	0.395054	DOWN	355.939	355.938	355.939	22.6013	22.3395	22.8677	724153	1.14162e+07	5.2293e+06	6.89995e+06	1.40149e+06			16		M356T23_1	n
1270		1.99324	0.995117	1.43495	0.270507	0.395065	UP	521.914	521.913	521.914	7.28612	7.2642	7.3912	266893	2.80196e+06	941509	5.585e+06	3.2246e+06			25		M522T7	n
1271		2.07199	1.05102	1.43429	0.2711	0.395153	UP	356.846	356.846	356.847	6.50922	6.49948	6.59142	222905	445175	159382	922398	553818		[M-H+HCOOH]- 311.852	68		M357T7_2	n
1272		1.74581	-0.803899	-1.40645	0.271123	0.395156	DOWN	228.995	228.994	228.995	55.4066	55.3587	55.6183	41177.7	545279	96207.3	312071	270605			358		M229T55_1	y
1273		3.23355	1.69312	1.47106	0.271278	0.395179	UP	224.903	224.903	224.903	2.12976	2.11297	2.14655	131124	229382	111216	741716	592889			28		M225T2	n
1274		1.85001	0.887534	1.37054	0.271348	0.39519	UP	339.234	339.233	339.234	2.12688	2.08412	2.16135	62805.8	212916	92839.3	393896	209028			28		M339T2	y
1275		1.07479	-0.104048	-1.31021	0.271369	0.395193	DOWN	220.963	220.962	220.963	6.98359	6.903	7.17893	93127.4	864208	66873.9	804075	42977.9			94		M221T7_3	y
1276		1.26049	0.333982	1.32954	0.271533	0.395217	UP	623.763	623.763	623.764	1.0717	1.00201	1.08547	51906	877497	146486	1.10607e+06	259256			88		M624T1	n
1277		1.78081	0.832536	1.42501	0.271623	0.39523	UP	740.461	740.461	740.461	6.71479	6.70645	6.72313	182818	1.08904e+06	301982	1.93937e+06	988452			43		M740T7_2	y
1278		3.19596	1.67625	1.37684	0.271832	0.395261	UP	122	122	122	2.23495	2.21327	2.23965	84155.6	47499.6	51115.7	151807	120852			211		M122T2	n
1279		1.31363	0.393557	1.42515	0.271877	0.395268	UP	248.96	248.96	248.961	2.08546	2.05793	2.14655	12407041	1.32799e+08	1.46655e+07	1.74449e+08	4.84474e+07	[73][M]-		28		M249T2_3	n
1280		2.22923	-1.15655	-1.30568	0.273068	0.395443	DOWN	142.996	142.996	142.996	32.4373	32.4098	32.4765	274817	5.65705e+06	3.48902e+06	2.5374e+06	2.22548e+06			271		M143T32_1	n
1281		1.46026	-0.546224	-1.31995	0.273192	0.395461	DOWN	824.813	824.811	824.814	2.09565	1.99195	2.21327	123830	1.27718e+06	264729	874629	457116			28		M825T2_2	n
1282		1.74197	-0.800716	-1.39426	0.273216	0.395464	DOWN	228.995	228.994	228.995	59.8795	59.8558	59.9132	28424.7	295552	53852.2	169401	147170			319		M229T60_1	y
1283		1.50309	0.587934	1.37758	0.273241	0.395468	UP	172.098	172.098	172.098	7.59372	7.45688	7.83292	639953	1.76541e+07	1.03407e+07	2.65358e+07	4.21575e+06			60		M172T8_1	y
1284		1.8897	-0.918154	-1.37911	0.273246	0.395469	DOWN	126.905	126.905	126.905	50.805	50.692	50.8412	562455680	1.4081e+10	3.11701e+09	7.45146e+09	7.72069e+09			1		M127T51_1	y
1285		1.68637	0.753921	1.47922	0.27368	0.395532	UP	338.786	338.786	338.787	6.93193	6.84275	7.04493	245162	1.68383e+06	165760	2.83956e+06	1.34308e+06		[2M-3H]3- 509.678	147		M339T7	n
1286		1.67709	0.745964	1.41302	0.27382	0.395552	UP	558.813	558.812	558.814	7.07191	7.02257	7.29592	216798	983398	244423	1.64925e+06	778730		[M+Cl]- 523.844	73		M559T7_2	n
1287		1.98144	0.98655	1.40392	0.274033	0.395583	UP	648.532	648.53	648.532	6.70315	6.62865	6.9504	387832	1.60933e+06	617891	3.1888e+06	1.84807e+06		[M-H-CO]- 677.524	43		M649T7_1	y
1288		2.30872	1.2071	1.32096	0.274208	0.395609	UP	327.907	327.907	327.907	3.40257	3.3637	3.44143	1.08164e+06	1.22371e+07	1.03054e+07	2.82522e+07	1.82965e+07			83		M328T3_2	n
1289		2.15258	-1.10606	-1.47606	0.274744	0.395686	DOWN	369.954	369.954	369.955	50.6183	50.4867	50.911	508236	2.20553e+07	1.61687e+06	1.02457e+07	1.3763e+07			11		M370T51	y
1290		1.29632	-0.374418	-1.27491	0.274927	0.395713	DOWN	736.76	736.759	736.76	1.5941	1.58149	1.60672	147518	229167	55962.1	176783	43964.9			23		M737T2	n
1291		1.46407	-0.549983	-1.28179	0.274938	0.395715	DOWN	432.859	432.858	432.859	6.11838	6.06928	6.12883	100044	1.14145e+06	289049	779642	394303			196		M433T6	n
1292		3.53494	1.82168	1.4321	0.275185	0.39575	UP	818.56	818.559	818.56	1.49465	1.49078	1.49851	41340.9	31448	23538	111167	93498.3			113		M819T1	n
1293		1.23083	0.299628	1.35673	0.275387	0.395779	UP	186.861	186.861	186.861	6.8869	6.82762	6.94618	120598	2.00138e+06	238477	2.46336e+06	539407		[M+Cl]- 151.897	14		M187T7	n
1294		1.7325	0.792855	1.43406	0.275398	0.395781	UP	412.808	412.808	412.809	7.01778	6.91743	7.19343	204434	1.07011e+06	224644	1.85396e+06	919694			94		M413T7_1	n
1295		2.33716	1.22476	1.44024	0.275648	0.395817	UP	794.869	794.869	794.869	1.68574	1.67758	1.6939	55392.5	87950.4	30998	205554	137994			5		M795T2	n
1296		1.89375	0.921248	1.44027	0.275803	0.395839	UP	255.233	255.233	255.234	2.56463	2.48437	2.60585	64383.8	284368	66458.6	538522	298329		[M-H]- 256.241	144		M255T3	y
1297		1.82041	-0.864265	-1.26097	0.276036	0.395873	DOWN	416.884	416.884	416.885	6.28555	6.26205	6.29733	137294	553966	248915	304308	235880			42		M417T6	n
1298		1.65884	0.730178	1.40246	0.276348	0.395917	UP	588.899	588.898	588.9	1.72907	1.69182	2.0435	5906723	1.89693e+07	4.649e+06	3.14671e+07	1.47181e+07	[213][M]-		5		M589T2	n
1299		5.20362	2.37951	1.4087	0.276497	0.395939	UP	828.579	828.579	828.579	1.44141	1.42104	1.46178	142192	73550.6	108801	382729	364245			114		M829T1	y
1300		2.05009	1.03569	1.38422	0.276519	0.395942	UP	264.817	264.817	264.818	6.23502	6.21975	6.33688	263475	881330	392228	1.80681e+06	1.08958e+06			42		M265T6_1	n
1301		2.25609	1.17383	1.31563	0.276572	0.395949	UP	341.923	341.922	341.923	3.44622	3.44143	3.451	272114	3.00079e+06	2.40471e+06	6.77008e+06	4.34073e+06			74		M342T3	n
1302		1.651	0.723338	1.36654	0.276638	0.395959	UP	732.863	732.863	732.865	1.69475	1.69182	1.73392	390881	1.18265e+06	365595	1.95256e+06	904760	[243][M]-		5		M733T2	n
1303		1.5928	-0.671568	-1.40105	0.276805	0.395983	DOWN	360.715	360.715	360.716	29.8997	29.8708	30.0223	311184	5.71779e+06	790430	3.58976e+06	2.50923e+06			253		M361T30	n
1304		1.86399	0.898393	1.34659	0.276929	0.396	UP	686.783	686.782	686.785	2.0739	2.05793	2.12688	56126	202550	93212.3	377551	204889			28		M687T2	n
1305		1.81253	0.858008	1.4074	0.2772	0.396039	UP	648.797	648.795	648.797	6.54295	6.51363	6.62507	78099.9	98726.3	27939.7	178945	94686.2		[M-2H+K]- 611.836 [M+Cl]- 613.834	12		M649T7_3	n
1306		1.75285	-0.809701	-1.47294	0.277779	0.396121	DOWN	251.951	251.95	251.951	48.565	48.5393	48.5725	18291.4	207681	6438.82	118217	105004			91		M252T49	n
1307		1.66697	0.73723	1.29747	0.277804	0.396125	UP	422.994	422.993	422.994	6.5064	6.48522	6.58145	99500.9	97364.2	44966.4	162304	74116.6			68		M423T7_2	n
1308		2.99275	1.58147	1.4328	0.27795	0.396146	UP	276.799	276.799	276.799	2.12228	2.11297	2.13158	1.82059e+06	5.51183e+06	2.84541e+06	1.64955e+07	1.29693e+07			28		M277T2_1	n
1309		3.24029	-1.69612	-1.43539	0.278089	0.396165	DOWN	307.972	307.972	307.973	5.32569	5.31388	5.3375	23292.4	106947	87314.1	33005.3	18357.5			22		M308T5	n
1310		2.49377	1.31833	1.43061	0.278106	0.396168	UP	190.885	190.885	190.885	1.4261	1.40544	1.43835	311195	1.34791e+06	532501	3.36138e+06	2.37885e+06			9		M191T1_1	n
1311		4.64533	2.21578	1.43391	0.278234	0.396186	UP	872.661	872.661	872.662	7.01942	7.00745	7.03138	29947.4	8983.53	8479.17	42695.9	39829.4			94		M873T7	n
1312		1.46348	0.549408	1.25886	0.278384	0.396207	UP	392.707	392.707	392.707	6.75242	6.60672	6.83377	72590.2	216870	89054.4	317385	105810			19		M393T7_1	n
1313		2.51717	1.33181	1.44213	0.278424	0.396213	UP	306.077	306.077	306.078	22.4211	22.2503	22.5888	1.60868e+06	6.66434e+06	2.21585e+06	1.67753e+07	1.19398e+07			24		M306T22	y
1314		1.75816	-0.814064	-1.42295	0.278837	0.396271	DOWN	182.989	182.989	182.989	52.4548	52.436	52.4672	1.51593e+06	1.56105e+07	1.89067e+06	8.87866e+06	7.97311e+06			111		M183T52_1	y
1315		2.19671	1.13535	1.46334	0.278954	0.396287	UP	282.778	282.778	282.778	6.57822	6.52772	6.76742	111447	267860	34856.1	588412	377810		[M-H]- 283.785 [2M-3H]3- 425.678	12		M283T7_1	n
1316		2.35803	1.23758	1.46317	0.278957	0.396288	UP	327.97	327.97	327.971	6.49305	6.45208	6.53637	465719	322736	48101	761022	516593		[M+Cl+NaCOOH]- 225.013 [M-H+NaCOOH]- 260.99 [M+Cl]- 293.001 [M-H]- 328.978	68		M328T6	y
1317		1.7032	0.768251	1.45083	0.279204	0.396322	UP	288.859	288.859	288.859	6.99844	6.91743	7.19343	1.3475e+06	8.2363e+06	987558	1.40281e+07	6.84354e+06			94		M289T7_2	n
1318		1.18444	0.244209	1.44329	0.279263	0.396331	UP	72.9432	72.9431	72.9433	6.74223	6.57188	6.89097	5.04444e+06	7.51183e+07	1.63904e+07	8.89733e+07	2.79525e+06		[M+Cl]- 37.9738 [M+2Cl]2- 75.9499	43		M73T7_1	n
1319		1.57545	0.655762	1.37989	0.279369	0.396346	UP	500.853	500.852	500.854	7.11531	7.0683	7.32473	649686	2.8811e+06	676955	4.53903e+06	1.96786e+06	[197][M]-	[M+Cl+NaCOOH]- 397.901	73		M501T7_2	n
1320		2.21818	1.14937	1.3013	0.279507	0.396365	UP	596.713	596.713	596.715	7.0308	6.96173	7.22208	67638.2	105542	84767.4	234111	148658			94		M597T7	n
1321		3.70625	1.88996	1.40363	0.279597	0.396378	UP	842.575	842.575	842.575	6.97437	6.93172	7.01702	23803.7	9538.88	8853.82	36069.4	31518.2			94		M843T7_1	n
1322		5.51709	2.46391	1.44132	0.280018	0.396437	UP	558.888	558.888	558.889	1.72915	1.72367	1.73463	59065	45242.3	40390	249606	242242			5		M559T2	y
1323		1.69251	0.759163	1.32089	0.280291	0.396475	UP	903.335	903.335	903.336	1.69286	1.69182	1.6939	51938.1	114939	46372.5	194535	93504.9			5		M903T2_2	n
1324		3.46718	1.79376	1.37861	0.280326	0.39648	UP	824.549	824.548	824.55	1.44724	1.4367	1.44905	111537	101434	100719	351690	297847	[261][M]-		7		M825T1	y
1325		1.50066	0.585601	1.328	0.280581	0.396515	UP	354.85	354.849	354.85	7.00291	6.96173	7.20757	556548	3.10459e+06	864752	4.65894e+06	1.83359e+06			94		M355T7_1	n
1326		1.48246	0.567993	1.40584	0.28064	0.396523	UP	444.675	444.674	444.676	6.69555	6.62103	6.84702	2.00539e+06	1.51771e+07	2.30609e+06	2.24995e+07	8.72172e+06		[M+Cl]- 409.71	43		M445T7_1	n
1327		1.81464	-0.859687	-1.42071	0.280827	0.396549	DOWN	182.989	182.989	182.989	49.1769	48.8998	49.2868	248016	6.62663e+06	783106	3.65149e+06	3.54158e+06			34		M183T49_1	y
1328		1.28955	0.36687	1.42692	0.281051	0.39658	UP	180.973	180.973	180.973	2.09605	2.05135	2.16482	5.57525e+06	6.31925e+07	4.35451e+06	8.14901e+07	2.17792e+07	[46][M]-		28		M181T2_2	n
1329		1.5871	0.666392	1.3833	0.281075	0.396584	UP	560.81	560.809	560.811	7.07191	7.03788	7.29592	224552	943780	210803	1.49787e+06	660987		[M-H]- 561.82	73		M561T7_2	y
1330		1.263	0.336853	1.45566	0.281102	0.396588	UP	112.986	112.986	112.986	1.67882	1.6499	1.71985	131321784	1.12715e+09	2.96846e+07	1.42358e+09	3.51472e+08	[6][M]-		5		M113T2_2	y
1331		2.70517	-1.43572	-1.33749	0.28116	0.396596	DOWN	182.989	182.989	182.989	56.7877	56.4968	57.0682	307926	5.48058e+06	4.09704e+06	2.0257e+06	1.79766e+06			152		M183T57	y
1332		1.69563	0.761818	1.41927	0.281245	0.396607	UP	944.816	944.815	944.818	1.7094	1.67845	1.72085	185500	725563	132632	1.23028e+06	601504			5		M945T2	n
1333		5.20732	2.38054	1.44888	0.281406	0.39663	UP	242.176	242.176	242.176	1.36094	1.36054	1.37469	88646.3	58420.1	33293.8	304212	291938			9		M242T1	n
1334		1.63198	0.706625	1.34431	0.281888	0.396696	UP	540.751	540.75	540.752	7.01778	6.94663	7.20757	187867	630558	195990	1.02906e+06	474563			94		M541T7	n
1335		1.84753	-0.8856	-1.26165	0.282285	0.396751	DOWN	172.098	172.098	172.098	59.1029	59.0157	59.3505	852130	1.65795e+07	6.06622e+06	8.97357e+06	8.49887e+06			192		M172T59_1	y
1336		1.27283	0.348041	1.24674	0.282425	0.39677	UP	608.837	608.836	608.838	22.7062	22.4492	22.8827	57584	506189	123275	644293	147020			259		M609T23	n
1337		1.45814	0.544125	1.37011	0.282918	0.396838	UP	278.83	278.83	278.83	6.96346	6.903	7.15037	1.3155e+06	9.9599e+06	1.83363e+06	1.45229e+07	5.46919e+06			94		M279T7_2	n
1338		1.97682	-0.983183	-1.23849	0.283273	0.396887	DOWN	174.956	174.956	174.957	40.7447	40.6535	40.8922	857246	1.67727e+07	8.2741e+06	8.48444e+06	8.11781e+06			190		M175T41_1	y
1339		1.50503	0.58979	1.29725	0.284747	0.397088	UP	502.85	502.849	502.851	7.10813	7.05318	7.32473	363991	1.78451e+06	558234	2.68574e+06	1.06597e+06	[197][M+2]-		73		M503T7_2	n
1340		2.15595	1.10832	1.40418	0.285072	0.397132	UP	245.114	245.114	245.114	1.44724	1.43394	1.4522	31969.1	80472.3	24721.8	173494	112047			7		M245T1	y
1341		1.97933	0.985016	1.30713	0.285091	0.397134	UP	339.946	339.946	339.947	6.22706	6.22427	6.22985	17763.6	65461.2	37267.8	129570	76337.4			42		M340T6	n
1342		1.9437	-0.958806	-1.43785	0.285336	0.397167	DOWN	341.923	341.922	341.923	50.6533	50.5835	50.8695	29085252	1.23759e+09	6.2379e+07	6.3672e+08	7.21128e+08	[145][M]-		11		M342T51	n
1343		1.64672	0.719595	1.37453	0.285676	0.397213	UP	490.824	490.824	490.825	7.05896	7.00745	7.28143	273633	1.3946e+06	323319	2.29652e+06	1.08955e+06			94		M491T7	n
1344		1.83157	0.873077	1.37883	0.285868	0.397239	UP	142.996	142.996	142.997	2.12718	2.07915	2.15012	692422	4.1076e+06	1.16952e+06	7.52334e+06	4.1283e+06			28		M143T2	n
1345		2.45908	1.29812	1.34598	0.286104	0.397271	UP	372.937	372.936	372.937	5.23228	5.14372	5.36077	285229	1.53384e+06	995141	3.77184e+06	2.70253e+06	[159][M+1]-		22		M373T5	n
1346		4.02689	2.00967	1.40439	0.286961	0.397386	UP	576.656	576.656	576.656	6.93883	6.903	6.97467	32120.6	20530.3	14768.7	82408.8	74872.7		[M-H+NaCOOH]- 509.678	147		M577T7_1	n
1347		1.23221	0.301243	1.2578	0.287301	0.397431	UP	699.871	699.87	699.872	1.70031	1.69182	1.7088	51393.6	104941	28155.3	129309	18255.8	[237][M+1]-		5		M700T2	n
1348		1.60657	0.683982	1.35423	0.287601	0.397471	UP	708.487	708.487	708.487	6.7005	6.67787	6.72313	187036	908483	222009	1.45954e+06	668918		[M-H]- 709.498	43		M708T7	n
1349		1.57264	0.653188	1.33888	0.287605	0.397472	UP	228.903	228.903	228.903	6.5349	6.50922	6.6103	960753	3.32597e+06	860910	5.23054e+06	2.30857e+06		[M-H+CF3COOH]- 95.9277	12		M229T7_2	n
1350		3.20997	1.68256	1.3655	0.287679	0.397482	UP	402.69	402.689	402.69	6.59569	6.52772	6.66367	73241	76909.2	62139.3	246877	206443			12		M403T7_1	n
1351		1.77392	0.826938	1.32233	0.287694	0.397484	UP	910.345	910.344	910.348	6.72073	6.67787	6.99088	128864	554567	216594	983756	518773		[3M+2Cl]2- 583.584	43		M910T7	n
1352		1.34889	0.431769	1.41396	0.287897	0.397511	UP	297.047	297.047	297.048	6.53794	6.49948	6.61828	1760006	4.60587e+06	293525	6.21279e+06	1.94642e+06	[107][M+2]-		12		M297T7_3	n
1353		1.701	0.76638	1.35921	0.288061	0.397533	UP	300.885	300.884	300.885	7.03116	6.97705	7.26682	204148	1.15403e+06	308935	1.96299e+06	983494			94		M301T7	n
1354		1.52242	0.606366	1.2243	0.288149	0.397544	UP	335.924	335.924	335.924	1.62159	1.62159	1.6216	24278	28922.5	14759.3	44032.3	15462.9			23		M336T2	n
1355		1.46748	0.553337	1.39051	0.288191	0.39755	UP	704.759	704.758	704.76	6.53794	6.51363	6.62507	109970	239121	30619.6	350904	135831		[M+Cl]- 669.795	12		M705T7_2	n
1356		1.97112	0.979013	1.35974	0.288294	0.397564	UP	133.762	133.762	133.763	24.0145	23.9882	24.0885	37422.4	62262.5	74192.1	123248	23028.5			18		M134T24_1	n
1357		79.4786	6.31249	1.43203	0.288441	0.397583	UP	885.556	885.555	885.556	2.8246	2.80135	2.84785	89344	3251.47	4408.19	279185	333715	[279][M]-		219		M886T3	n
1358		2.445	-1.28983	-1.36215	0.288593	0.397603	DOWN	592.794	592.794	592.795	5.74965	5.69623	5.80307	10708.3	21903.8	15762.2	8958.61	4743.53		[M-2H+Na]- 571.833 [M-H-CH2]- 607.816	61		M593T6	n
1359		1.97936	0.985037	1.38383	0.288779	0.397628	UP	589.902	589.902	589.902	7.41733	7.36228	7.47238	198886	2.49564e+06	709794	4.93978e+06	2.97569e+06			60		M590T7_2	y
1360		1.54387	0.626555	1.35555	0.288953	0.397651	UP	568.841	568.841	568.843	7.14242	7.0683	7.33935	445517	2.0648e+06	431335	3.18779e+06	1.36853e+06	[212][M]-	[M-H+HCOOH]- 523.844	73		M569T7_2	n
1361		1.16131	0.215751	1.39249	0.28908	0.397667	UP	224.903	224.903	224.903	19.6488	19.5812	19.7165	221126	3.28264e+06	134683	3.81216e+06	644721			67		M225T20	n
1362		1.30614	0.385308	1.27521	0.289182	0.397681	UP	400.91	400.91	400.911	2.06908	2.04458	2.10977	1693239	1.61249e+07	3.23184e+06	2.10614e+07	5.87463e+06	[173][M]-		28		M401T2_1	n
1363		1.25032	-0.322299	-1.2785	0.289471	0.397719	DOWN	262.88	262.88	262.881	14.1276	13.9638	14.227	75588.1	834460	199567	667397	106762			343		M263T14_1	n
1364		1.32629	0.407398	1.39426	0.289733	0.397754	UP	295.051	295.05	295.051	6.53794	6.49948	6.61828	4.75064e+06	1.51974e+07	1.17981e+06	2.01562e+07	6.04612e+06	[107][M]-		12		M295T7	y
1365		1.77376	-0.826812	-1.22812	0.289765	0.397758	DOWN	486.254	486.253	486.254	49.1542	49.145	49.1722	24550.8	67843.4	26278.3	37983.8	32906.9			34		M486T49	y
1366		1.19262	0.254133	1.22729	0.289954	0.397783	UP	756.826	756.825	756.827	2.03516	1.97883	2.09565	195592	1.45754e+06	247771	1.73829e+06	309190			28		M757T2_1	n
1367		1.82686	-0.869363	-1.22207	0.290026	0.397792	DOWN	188.906	188.906	188.906	55.3255	55.1732	55.4887	240243	3.19116e+06	1.34084e+06	1.74654e+06	1.54735e+06			280		M189T55_1	n
1368		1.55357	-0.635587	-1.37475	0.290136	0.397806	DOWN	395.221	395.221	395.222	2.3247	2.26345	2.36233	16930.6	70277	7651.51	45235.8	30607.6			162		M395T2	y
1369		2.45993	1.29861	1.38025	0.290157	0.397809	UP	134.895	134.895	134.895	6.54295	6.51363	6.56403	231097	301937	125861	742743	538651		[M-H-CO]- 163.896	12		M135T7_4	n
1370		1.31865	-0.39906	-1.41186	0.290277	0.397825	DOWN	114.936	114.936	114.936	8.86073	8.6847	8.88327	340770	1.43476e+07	503532	1.08805e+07	4.22343e+06			71		M115T9_2	n
1371		1.65654	0.72817	1.29636	0.290301	0.397828	UP	296.891	296.89	296.891	7.03116	6.97705	7.28143	2.05216e+06	1.3976e+07	5.19268e+06	2.31518e+07	1.11056e+07			94		M297T7_1	n
1372		1.45321	0.539247	1.36555	0.290639	0.397872	UP	410.968	410.968	410.969	6.53794	6.51363	6.62507	615433	1.61364e+06	242468	2.34496e+06	895357	[176][M]-	[M+Cl]- 375.999	12		M411T7	y
1373		1.33831	0.420417	1.31228	0.290644	0.397873	UP	264.935	264.934	264.935	2.11137	2.05793	2.15012	1.51408e+06	1.46985e+07	2.52719e+06	1.96713e+07	6.05737e+06	[85][M]-		28		M265T2_2	y
1374		3.03531	1.60184	1.37884	0.290714	0.397882	UP	452.279	452.279	452.28	2.96108	2.82052	3.00055	254445	474817	273883	1.44122e+06	1.18266e+06			277		M452T3	y
1375		1.35721	0.440639	1.40875	0.290757	0.397888	UP	187.098	187.098	187.098	23.2512	23.225	23.3193	67043.7	197581	10754.6	268157	86104.9			105		M187T23_2	y
1376		1.65745	-0.728966	-1.24051	0.290877	0.397903	DOWN	266.932	266.932	266.933	6.29962	6.29483	6.34048	41905	187411	58461.5	113072	85765.1			42		M267T6_2	n
1377		1.55021	0.632464	1.32436	0.291339	0.397964	UP	694.791	694.79	694.792	7.11982	7.05318	7.32473	155005	558191	141579	865313	375886	[236][M]-	[M+Cl]- 659.827	73		M695T7	n
1378		1.83289	-0.874123	-1.25708	0.291425	0.397975	DOWN	259.005	259.005	259.005	57.8406	57.8262	57.855	45265	569268	182017	310320	306869			258		M259T58	y
1379		3.73687	1.90183	1.40119	0.291448	0.397978	UP	394.014	394.014	394.014	2.08917	2.08132	2.14655	42627.7	52200.5	25490.5	195067	174752			28		M394T2	y
1380		3.90333	1.96471	1.37091	0.291549	0.397991	UP	732.69	732.689	732.69	7.01903	6.99227	7.04578	34631	22388.9	19828.4	88159.4	80695.8			94		M733T7_1	n
1381		1.83656	0.877008	1.35409	0.291792	0.398022	UP	582.647	582.646	582.648	6.98697	6.96043	7.17893	44859	122717	36677.9	225378	126090			94		M583T7	n
1382		1.74253	0.801183	1.34321	0.292255	0.398082	UP	688.756	688.755	688.757	7.08603	7.02257	7.29592	53103.3	146207	42207.2	254769	133476		[3M-2H]2- 459.845 [M+Cl+NaCOOH]- 585.795 [M+Cl]- 653.784	73		M689T7_2	n
1383		2.19728	1.13572	1.41478	0.292288	0.398087	UP	371.991	371.99	371.991	17.0815	17.0047	17.2442	54536.1	233514	15332.7	513097	341936		[M+Cl]- 337.02	153		M372T17_2	y
1384		1.32662	0.407757	1.31786	0.292299	0.398088	UP	477.954	477.953	477.954	21.4063	21.3125	21.474	66468.3	1.76001e+06	704977	2.33487e+06	271718			65		M478T21	y
1385		9.25709	3.21056	1.39472	0.292686	0.398138	UP	557.129	557.129	557.129	6.47629	6.45685	6.49573	51962.8	4647.55	8049.79	47656.4	52800.9			68		M557T6	y
1386		2.4145	1.27173	1.38133	0.292704	0.398141	UP	362.933	362.933	362.934	2.10503	2.08132	2.11967	44083.4	108138	37641.6	261099	188069			28		M363T2	n
1387		1.37124	-0.455485	-1.37454	0.292792	0.398152	DOWN	313.891	313.891	313.892	23.2953	23.269	23.4072	196114	3.63475e+06	1.21086e+06	2.6507e+06	267264		[M-H-C4H8]- 370.961	30		M314T23_1	n
1388		1.52852	-0.612136	-1.34933	0.292859	0.398161	DOWN	282.907	282.907	282.907	5.82997	5.75783	5.92602	146558	1.02377e+06	436029	669778	127881		[M-H-COCH2]- 325.938	41		M283T6_2	n
1389		2.17991	1.12427	1.35168	0.292888	0.398164	UP	254.103	254.103	254.104	1.44197	1.43394	1.51101	38222.4	84922.8	35356.1	185124	123434			114		M254T1	y
1390		1.15402	-0.206665	-1.20973	0.293094	0.398191	DOWN	114.937	114.936	114.937	11.3816	11.1489	11.5578	348487	4.26741e+06	588496	3.69787e+06	564469			246		M115T11_1	n
1391		1.88107	0.91155	1.31045	0.293235	0.398209	UP	220.871	220.871	220.871	6.57188	6.53293	6.60672	543393	2.15539e+06	926560	4.05443e+06	2.33273e+06			12		M221T7_2	y
1392		2.67279	1.41835	1.40207	0.293352	0.398224	UP	626.584	626.584	626.584	6.90493	6.903	6.98697	50841.6	80694.2	17784.4	215679	165803			14		M627T7_2	n
1393		1.87015	-0.903155	-1.37307	0.293551	0.398249	DOWN	173.007	173.007	173.007	31.9857	31.9487	32.082	162879	2.87216e+06	356581	1.53553e+06	1.64796e+06			303		M173T32	y
1394		1.71121	-0.77502	-1.40773	0.293657	0.398263	DOWN	226.802	226.802	226.802	48.3563	48.3413	48.3597	136743	974080	30514.5	568969	497507			254		M227T48_1	n
1395		1.71709	-0.779968	-1.26199	0.293983	0.398305	DOWN	378.92	378.92	378.92	32.469	32.4428	32.4765	62774.8	948853	259434	552328	478402			199		M379T32_1	n
1396		1.70141	-0.766727	-1.32913	0.294184	0.398331	DOWN	426.694	426.694	426.695	59.8948	59.8257	59.8987	96484.6	997672	170815	586116	508386			319		M427T60_2	n
1397		1.82436	0.867392	1.3756	0.294242	0.398338	UP	262.88	262.88	262.88	2.10786	2.08412	2.13158	796007	3.06319e+06	622777	5.58836e+06	3.11791e+06			28		M263T2	n
1398		1.39749	-0.482836	-1.20496	0.294636	0.398388	DOWN	162.049	162.049	162.049	23.7401	23.6813	23.811	39732.3	170561	49520.8	122048	49096.9	[32][M+1]-		225		M162T24	n
1399		2.70469	-1.43547	-1.2222	0.295304	0.398473	DOWN	555.134	555.133	555.134	6.56977	6.5349	6.60465	36179.5	74136.8	54238.1	27145.9	38638.8			12		M555T7	y
1400		3.82617	1.9359	1.34737	0.295337	0.398477	UP	824.729	824.729	824.73	7.06366	7.05902	7.0683	29376.8	14557.9	14200.9	56448.6	51944.7			94		M825T7	n
1401		1.82064	-0.864447	-1.20637	0.29546	0.398493	DOWN	104.044	104.035	104.044	59.4825	59.4823	59.5602	20807.9	215970	91562.3	118358	106100			296		M104T59_1	n
1402		2.42558	1.27833	1.32129	0.296136	0.398579	UP	371.934	371.933	371.934	5.27225	5.2115	5.37795	5000186	2.92816e+07	1.75552e+07	7.10249e+07	5.18281e+07	[159][M]-		22		M372T5	n
1403		1.69889	-0.764589	-1.34068	0.296336	0.398604	DOWN	174.956	174.956	174.957	45.8296	45.7153	45.9685	850162	1.28181e+07	1.8501e+06	7.54476e+06	6.55673e+06			194		M175T46_2	n
1404		1.72279	-0.784749	-1.39505	0.296338	0.398604	DOWN	195.086	195.086	195.086	48.5798	48.554	48.5863	233754	963592	39223.5	559055	500725	[53][M+1]-		91		M195T49_2	n
1405		1.15069	-0.202496	-1.20648	0.296377	0.398609	DOWN	242.944	242.944	242.944	29.6473	29.588	29.648	400656	5.90312e+06	705251	5.13008e+06	856890			239		M243T30	n
1406		1.70675	-0.771252	-1.27418	0.296793	0.398662	DOWN	228.995	228.994	228.995	54.0991	53.8395	54.6683	63729.8	486336	116602	284684	248078			333		M229T54_1	y
1407		2.70154	1.43378	1.32686	0.297086	0.398698	UP	342.265	342.265	342.267	1.49851	1.49078	1.52427	61924.7	64240.3	42716.1	173548	136144			113		M342T1	y
1408		1.96029	0.971071	1.35716	0.297159	0.398708	UP	136.992	136.991	136.992	25.5595	25.5292	25.6185	17398.1	59173.2	15852.5	115997	70766.3			59		M137T26	n
1409		1.52965	0.613199	1.35526	0.297245	0.398718	UP	366.876	366.875	366.876	7.06557	7.02257	7.28143	506742	3.36893e+06	508992	5.15327e+06	2.22289e+06	[156][M+2]-		94		M367T7	n
1410		5.80546	2.53741	1.39375	0.297656	0.39877	UP	362.107	362.107	362.107	6.54211	6.44177	6.62507	1.4747e+06	262348	66249.9	1.52305e+06	1.56531e+06		[M-H]- 363.114	12		M362T7	y
1411		1.70386	-0.76881	-1.39418	0.297724	0.398778	DOWN	191.02	191.02	191.02	48.4527	48.4192	48.4527	184104	1.48177e+06	24112.2	869386	760402	[51][M]-	[M+Cl]- 156.045	104		M191T48_1	y
1412		1.18161	0.240752	1.37699	0.29807	0.398822	UP	74.9402	74.9401	74.9404	6.74223	6.6018	6.89097	958941	1.48359e+07	3.3564e+06	1.75303e+07	469452		[2M-H]- 37.9738 [M-H]- 75.9499	43		M75T7	n
1413		2.0947	-1.06674	-1.22022	0.298109	0.398827	DOWN	172.098	172.098	172.098	56.396	56.3775	56.484	1.04698e+06	2.57793e+07	1.58666e+07	1.23067e+07	1.06757e+07			149		M172T56_2	y
1414		2.61208	1.3852	1.38635	0.298118	0.398828	UP	395.958	395.958	395.959	6.50157	6.45208	6.53637	407167	202293	36696.9	528407	405778		[M+Cl+NaCOOH]- 293.001 [M-H+NaCOOH]- 328.978 [M+Cl]- 360.989 [M-H]- 396.965	68		M396T7	y
1415		1.69157	0.758366	1.20603	0.298521	0.398878	UP	313.967	313.966	313.967	22.489	22.3395	22.6193	754813	3.70463e+06	2.92482e+06	6.26666e+06	2.23251e+06			206		M314T22_2	y
1416		1.15302	0.205421	1.22816	0.299221	0.398965	UP	121.03	121.03	121.03	5.76107	5.6825	5.90917	83785.4	962810	177012	1.11014e+06	108809		[M-H+NaCOOH]- 54.0538 [M-H]- 122.039	61		M121T6	y
1417		1.63711	0.711155	1.38242	0.299246	0.398968	UP	724.877	724.876	724.878	1.71667	1.70635	1.779	2.16614e+06	6.63113e+06	462146	1.08559e+07	5.27308e+06	[241][M]2-		5		M725T2_1	n
1418		1.71134	-0.775127	-1.31359	0.299802	0.399037	DOWN	172.098	172.098	172.098	54.2745	54.1713	54.3152	1.08015e+06	1.92196e+07	3.24985e+06	1.12305e+07	1.00203e+07			145		M172T54	y
1419		1.44596	0.532026	1.3302	0.300472	0.399119	UP	506.627	506.626	506.628	6.68883	6.64677	6.89097	570979	4.32808e+06	653825	6.25823e+06	2.4267e+06		[M+Cl]- 471.66 [M-H]- 507.635	43		M507T7	n
1420		1.60931	0.686439	1.34889	0.30094	0.399177	UP	736.467	736.467	736.469	6.73147	6.67787	6.86952	508168	3.44226e+06	541924	5.53964e+06	2.63807e+06	[244][M+2]-		43		M736T7	n
1421		2.36998	-1.24488	-1.19026	0.300953	0.399179	DOWN	268.977	268.977	268.977	24.1247	24.053	24.149	28389	196742	108512	83014.2	124956			331		M269T24	y
1422		3.37136	-1.75333	-1.23308	0.301128	0.3992	DOWN	375.064	375.064	375.064	6.53033	6.51022	6.55043	37789	42299.8	36891.6	12096.1	20951.1			12		M375T7_2	y
1423		1.60296	0.68074	1.31928	0.301314	0.399223	UP	434.863	434.863	434.864	7.08675	7.03788	7.29592	448660	2.27926e+06	506901	3.65357e+06	1.73162e+06	[182][M]-	[M-2H+K]- 397.901	73		M435T7	n
1424		1.91877	0.940183	1.30212	0.301615	0.39926	UP	375.91	375.91	375.911	7.10235	7.0683	7.14242	102809	520426	204318	998579	602315	[166][M+1]-		73		M376T7	n
1425		1.62374	0.69932	1.22244	0.301742	0.399275	UP	648.64	648.638	648.64	7.0066	6.93172	7.19343	69786.7	190247	87122	308912	143800			94		M649T7_2	n
1426		1.83932	-0.879169	-1.18576	0.301747	0.399276	DOWN	174.957	174.956	174.957	36.4998	36.216	36.682	949883	1.9705e+07	8.90086e+06	1.07129e+07	9.659e+06		[M+Cl]- 139.988	160		M175T36	y
1427		1.53413	0.617419	1.37321	0.302118	0.399321	UP	177.041	177.04	177.041	23.257	23.2292	23.3023	27562.6	74892.8	3748.66	114895	50315.9		[M-2H+K]- 140.092	30		M177T23_2	y
1428		1.69825	-0.764047	-1.36566	0.302311	0.399344	DOWN	391.96	391.959	391.96	48.542	48.4897	48.5577	17157.6	99640.4	6081.24	58407.9	51939.9			91		M392T49	y
1429		1.08593	0.118925	1.21845	0.302537	0.399372	UP	164.878	164.878	164.879	6.11154	5.96222	6.23265	46254.7	232020	14816.7	251957	24158.2			196		M165T6	n
1430		1.0706	0.0984164	1.19552	0.302822	0.399407	UP	276.8	276.799	276.8	1.10445	1.07696	1.15575	2.51469e+06	7.32257e+07	4.48077e+06	7.83953e+07	6.00142e+06			88		M277T1	n
1431		1.68146	-0.749716	-1.37243	0.302984	0.399426	DOWN	192.981	192.981	192.982	48.3597	48.3413	48.3762	21973	122124	3200.32	72365.3	62715.9			254		M193T48	n
1432		1.81153	0.857209	1.30887	0.303163	0.399448	UP	210.867	210.866	210.867	2.11137	2.07098	2.14655	164412	633835	198119	1.14821e+06	651212			28		M211T2_1	y
1433		3.38786	1.76037	1.25342	0.303379	0.399474	UP	825.552	825.552	825.552	1.44724	1.43394	1.4522	62877	46402.4	64817	156940	138314	[261][M+1]-		7		M826T1	n
1434		1.46313	0.549054	1.21287	0.30344	0.399481	UP	316.948	316.948	316.949	7.3478	7.23385	7.55522	11235835	1.88967e+08	6.64142e+07	2.76483e+08	1.0587e+08	[130][M]-		25		M317T7	y
1435		1.68478	-0.752562	-1.36696	0.303594	0.3995	DOWN	223.098	223.098	223.098	48.6443	48.4132	48.6533	113417	761557	31036.7	451757	391313			322		M223T49_2	y
1436		2.25291	1.17179	1.31188	0.304013	0.399551	UP	390.881	390.881	390.881	2.15887	2.14208	2.17565	22725	25713.7	11720.8	57930.5	40888.5			77		M391T2	n
1437		2.32312	1.21607	1.21487	0.304296	0.399585	UP	211.883	211.883	211.883	4.48003	4.3579	4.60313	1.81556e+06	5.84514e+06	5.71026e+06	1.3579e+07	9.43233e+06			100		M212T4	n
1438		1.69795	0.763791	1.28936	0.304581	0.399619	UP	134.865	134.865	134.865	6.62911	6.54295	6.69198	81491.2	335770	103190	570120	297419		[M-H-C2H4]- 163.896	12		M135T7_1	n
1439		1.71703	0.779911	1.22746	0.304613	0.399623	UP	294.772	294.771	294.772	6.21786	6.15033	6.32163	100711	511543	248617	878333	453949			42		M295T6	n
1440		1.70415	0.769056	1.3323	0.304838	0.39965	UP	238.932	238.932	238.932	7.07953	7.03152	7.31025	3.60659e+06	3.25046e+07	6.21236e+06	5.53928e+07	2.91e+07	[66][M]-		73		M239T7_2	n
1441		1.8718	0.90443	1.31092	0.305162	0.399689	UP	619.552	619.551	619.553	6.66356	6.62865	6.74333	329262	1.82227e+06	561280	3.41092e+06	2.02258e+06		[3M+2Cl]2- 389.721	12		M620T7	n
1442		1.39484	0.4801	1.31774	0.305373	0.399714	UP	357.003	357.003	357.004	6.53292	6.49948	6.62507	131312	324460	41509.1	452570	163193	[153][M+4]-		12		M357T7_3	n
1443		2.0507	-1.03612	-1.18251	0.305501	0.399729	DOWN	341.998	341.998	341.999	49.5453	49.2992	49.5825	54499.4	510468	299899	248659	238989			64		M342T50	y
1444		1.33286	0.414524	1.1739	0.305577	0.399738	UP	254.953	254.952	254.953	24.0247	24.0005	24.0745	35993.1	184245	64521.7	245573	63442.3			17		M255T24_2	n
1445		1.55643	0.638244	1.35957	0.305613	0.399742	UP	151.04	151.04	151.04	2.228	2.18643	2.2548	94364.7	245248	13435.3	381712	173332			211		M151T2_2	y
1446		2.21794	1.14922	1.32374	0.305841	0.39977	UP	588.898	588.898	588.898	7.31356	7.27932	7.3478	2.76448e+06	1.8533e+07	6.61938e+06	4.11051e+07	2.87833e+07			25		M589T7_4	n
1447		1.76708	0.821367	1.18813	0.30603	0.399792	UP	638.61	638.609	638.612	6.97467	6.91743	7.19343	59286.2	139696	92265.6	246854	126056			94		M639T7_1	y
1448		1.90838	-0.932351	-1.17568	0.306298	0.399824	DOWN	183.103	183.103	183.103	48.4592	48.4282	48.4677	17007.2	90054.6	48203.7	46924.4	41398.9		[M-H-C2H4]- 212.138	104		M183T48_2	y
1449		1.29739	0.375618	1.25204	0.306337	0.399829	UP	173.082	173.082	173.082	23.2446	23.21	23.3193	59685.7	160783	26768.3	208599	60489.9		[M-H-CO]- 202.088	105		M173T23_3	y
1450		1.94815	0.962108	1.29059	0.306371	0.399833	UP	414.83	414.829	414.83	2.10291	2.05793	2.11967	177178	519879	204788	1.0128e+06	629041			28		M415T2	n
1451		1.61627	0.692669	1.27318	0.306536	0.399852	UP	702.762	702.76	702.763	6.53794	6.51363	6.62507	118014	201557	59394.2	325771	158200			12		M703T7	n
1452		1.86438	0.898696	1.24051	0.307122	0.399922	UP	292.774	292.773	292.774	6.22706	6.16648	6.32163	1.73031e+06	8.73573e+06	4.50192e+06	1.62867e+07	9.53346e+06			42		M293T6	n
1453		1.48607	0.571503	1.32506	0.307277	0.39994	UP	605.876	605.875	605.877	1.68459	1.66396	1.7094	212786	769361	99646.8	1.14333e+06	478563	[218][M+1]-		5		M606T2_2	n
1454		1.68317	0.751177	1.25542	0.307398	0.399954	UP	735.469	735.469	735.471	6.73832	6.67787	6.82355	227082	1.14167e+06	417588	1.92162e+06	991732	[244][M+1]-		43		M735T7_2	n
1455		1.48446	0.569942	1.29038	0.307572	0.399975	UP	774.847	774.845	774.847	1.67912	1.67758	1.71985	228970	809019	157643	1.20096e+06	501921	[254][M]2-		5		M775T2_1	n
1456		1.40848	-0.494142	-1.3374	0.307663	0.399986	DOWN	532.841	532.841	532.842	22.8223	22.3682	23.1548	212187	4.55175e+06	1.68919e+06	3.23167e+06	263556			259		M533T23	n
1457		1.28862	0.365823	1.24655	0.307818	0.400004	UP	307.08	307.08	307.081	21.4002	21.3283	21.5033	487980	7.44059e+06	1.21318e+06	9.58807e+06	2.72611e+06	[118][M+1]-		65		M307T21	n
1458		1.64482	-0.717929	-1.3442	0.308028	0.400029	DOWN	140.012	140.012	140.012	22.0145	21.8563	22.1978	238028	3.32026e+06	1.66575e+06	2.01862e+06	195844			281		M140T22	y
1459		3.714	1.89297	1.31021	0.308235	0.400053	UP	792.647	792.646	792.65	7.01002	6.97705	7.03152	57328.1	27450.9	23780.1	102670	96552.3			94		M793T7_1	n
1460		2.02492	1.01787	1.26311	0.309088	0.400153	UP	538.753	538.753	538.754	7.0047	6.94663	7.017	117205	298911	149414	605271	392631			94		M539T7	n
1461		2.46073	1.29909	1.27118	0.309228	0.400169	UP	569.845	569.845	569.845	7.10005	7.08237	7.13128	43521.8	60101.4	39997.4	147893	112736	[212][M+1]-		73		M570T7	n
1462		2.83023	1.50092	1.33027	0.309235	0.40017	UP	360.276	360.276	360.276	1.53205	1.52976	1.53434	43952.4	37385.8	14238.6	105810	87945.3			113		M360T2	y
1463		1.65102	0.723359	1.27664	0.31052	0.40032	UP	250.965	250.965	250.965	7.27202	7.23385	7.31905	206422	2.80769e+06	767508	4.63556e+06	2.35816e+06	[72][M+2]-		25		M251T7	n
1464		1.85734	0.893238	1.27279	0.310727	0.400344	UP	584.845	584.844	584.846	6.53293	6.51363	6.65462	107200	171225	63455.2	318023	189421		[M-H-CO]- 613.834	12		M585T7_2	n
1465		1.50085	0.585777	1.18017	0.310783	0.40035	UP	412.884	412.883	412.884	22.6532	22.5833	23.1127	1.33533e+06	2.18013e+07	1.31792e+07	3.27204e+07	9.11678e+06			16		M413T23	n
1466		2.07741	1.05478	1.2206	0.310799	0.400352	UP	763.452	763.452	763.454	6.72313	6.72075	6.89632	92281.4	316933	217442	658398	433017			43		M763T7_4	y
1467		1.60345	0.681178	1.21448	0.310836	0.400356	UP	420.997	420.996	420.998	6.52693	6.48522	6.59142	164382	159524	63779.3	255788	121575		[M-H+NaCOOH]- 354.017 [M-H+HCOOH]- 375.999	12		M421T7	y
1468		1.69773	-0.763604	-1.20753	0.31087	0.40036	DOWN	82.9544	82.9542	82.9544	49.4385	49.4255	49.4392	651767	4.10098e+06	1.16807e+06	2.41531e+06	2.11701e+06		[3M+2Cl]2- 31.9874	2		M83T49	y
1469		1.68162	0.749853	1.25658	0.310952	0.40037	UP	212.093	212.093	212.093	1.44197	1.4367	1.44724	30611.9	87779.4	29429	147612	77042.7			114		M212T1	y
1470		1.5274	0.611073	1.2115	0.311017	0.400377	UP	126.216	126.215	126.217	0.509379	0.464595	0.554163	37060.6	72619.9	48299.1	110919	25795.4			218		M126T1_2	n
1471		1.94351	0.958662	1.25455	0.311213	0.4004	UP	327.907	327.907	327.907	2.52166	2.47868	2.56463	1.08699e+06	7.28865e+06	3.41607e+06	1.41656e+07	8.85851e+06			144		M328T3_1	n
1472		1.86346	-0.897982	-1.16482	0.311867	0.400475	DOWN	140.986	140.986	140.986	58.8567	58.8115	58.9612	33687.1	401512	172377	215202	216879			304		M141T59_1	n
1473		2.36878	1.24414	1.30126	0.311898	0.400479	UP	350.812	350.811	350.812	6.9737	6.95537	7.18348	57825.2	101698	42155.9	240901	180427			94		M351T7	n
1474		1.82674	-0.869271	-1.33448	0.312032	0.400494	DOWN	342.926	342.926	342.927	50.6533	50.5425	50.8025	1.38236e+06	5.70518e+07	2.89377e+06	3.12312e+07	3.33879e+07	[145][M+1]-		11		M343T51	n
1475		1.68497	-0.752727	-1.21671	0.312237	0.400518	DOWN	182.989	182.989	182.989	52.1465	52.0738	52.1745	1.51593e+06	2.36722e+07	6.12972e+06	1.40487e+07	1.22516e+07			112		M183T52_2	y
1476		1.67	-0.739848	-1.31605	0.312425	0.400539	DOWN	84.9909	84.9907	84.9909	49.145	49.139	49.1577	43999.3	293640	26515.6	175568	153116			34		M85T49_2	n
1477		3.72447	1.89704	1.28296	0.312467	0.400544	UP	330.221	330.221	330.221	1.49465	1.49078	1.49851	21669.8	11677.1	12180.8	44476.5	42572.1			113		M330T1	y
1478		1.65971	-0.730929	-1.31969	0.312537	0.400552	DOWN	248.974	248.974	248.975	48.2748	48.2722	48.2888	21143	87983.5	7139.51	52746.9	45692.4			288		M249T48_1	n
1479		2.34453	-1.2293	-1.23365	0.312722	0.400573	DOWN	96.9559	96.9555	96.9562	22.6566	22.5358	22.7773	40995984	4.96687e+08	1.60041e+08	2.1185e+08	3.66492e+08			16		M97T23_1	n
1480		1.11603	0.158377	1.22321	0.312723	0.400573	UP	385.939	385.939	385.939	2.0739	2.03773	2.19065	320238	2.7841e+06	195207	3.10715e+06	413678	[171][M+1]-		28		M386T2_1	n
1481		1.53919	0.622175	1.27447	0.312744	0.400576	UP	508.624	508.624	508.625	6.66472	6.66187	6.67787	195480	1.19667e+06	259220	1.8419e+06	837706		[M-H-C6H10O4]- 655.674 [M-H-C6H8O6]- 685.651	12		M509T7_1	n
1482		1.42563	0.511604	1.33481	0.313124	0.400619	UP	102.02	102.02	102.02	6.78132	6.73503	6.82762	180990	2.26176e+06	57826.3	3.22444e+06	1.24783e+06			19		M102T7	y
1483		1.74699	0.804874	1.27799	0.31323	0.400631	UP	410.925	410.925	410.926	23.2708	23.2292	23.2833	41179.1	204060	58190.6	356491	198224			30		M411T23	n
1484		1.66672	-0.737008	-1.27673	0.313421	0.400653	DOWN	300.871	300.87	300.871	48.2928	48.2897	48.3062	48666.9	205208	31656.6	122856	107141			288		M301T48	n
1485		1.53184	0.615261	1.26532	0.313449	0.400656	UP	673.867	673.867	673.868	1.69426	1.66396	2.02843	142206	567750	129631	869699	392473	[231][M+1]-		5		M674T2	n
1486		1.85679	-0.892812	-1.29804	0.313507	0.400663	DOWN	360.715	360.715	360.716	49.9958	49.9565	50.1123	650979	5.51419e+06	747252	2.96948e+06	3.31232e+06			140		M361T50	n
1487		1.56312	0.644426	1.26681	0.313553	0.400668	UP	286.862	286.861	286.862	6.99844	6.91743	7.19343	1.48449e+06	9.27914e+06	2.20633e+06	1.45044e+07	6.79504e+06			94		M287T7_3	n
1488		2.65148	1.4068	1.26191	0.313637	0.400678	UP	640.607	640.607	640.607	6.96043	6.91743	6.97332	49494.3	64910.6	47220.4	172109	139354			94		M641T7	n
1489		1.91511	-0.937427	-1.22932	0.313938	0.400712	DOWN	190.885	190.885	190.885	17.3959	17.2873	17.6058	428579	7.15494e+06	4.41163e+06	3.73605e+06	1.93433e+06			106		M191T17	n
1490		1.7849	-0.835841	-1.15141	0.314049	0.400724	DOWN	114.937	114.936	114.937	53.9041	53.5645	54.345	326963	5.59559e+06	2.5158e+06	3.1347e+06	2.71561e+06			249		M115T54	n
1491		2.18482	1.12751	1.16182	0.314225	0.400744	UP	131.035	131.035	131.035	1.4367	1.43394	1.50504	1.49636e+06	1.24794e+06	1.33238e+06	2.72651e+06	1.75602e+06			114		M131T1	y
1492		1.52127	0.605278	1.26262	0.314553	0.400782	UP	766.859	766.859	766.861	1.7094	1.6939	1.779	403942	1.338e+06	297724	2.03546e+06	909273	[252][M]-		5		M767T2	n
1493		1.75703	0.813138	1.29786	0.314584	0.400785	UP	586.576	586.575	586.577	6.82743	6.73503	6.91983	46898.1	59943.5	12622.8	105323	59230.4		[M+Cl]- 551.605 [M-H]- 587.582	14		M587T7_1	n
1494		1.61035	-0.687372	-1.15428	0.315144	0.400848	DOWN	180.973	180.973	180.974	2.8517	2.47122	3.0985	3.85179e+06	6.26741e+07	2.24749e+07	3.89196e+07	2.76661e+07			75		M181T3_2	n
1495		1.25629	0.329172	1.21677	0.315399	0.400877	UP	173.046	173.045	173.046	23.257	23.225	23.3193	35166.4	157241	24219.3	197541	52002.8		[M+Cl]- 138.081	30		M173T23_2	y
1496		1.77486	-0.827703	-1.1486	0.315464	0.400884	DOWN	316.022	316.021	316.022	49.4113	49.325	49.5228	1506856	1.61224e+07	7.07803e+06	9.08351e+06	7.91001e+06	[126][M]-	[M+Cl]- 281.061	2		M316T49_2	y
1497		2.89221	1.53217	1.31641	0.315569	0.400896	UP	531.932	531.931	531.933	6.47349	6.43813	6.53637	200760	104156	30737.1	301242	257486		[M+Cl+NaCOOH]- 428.976 [M-H+NaCOOH]- 464.952	68		M532T6	n
1498		1.43806	0.52412	1.24208	0.315687	0.40091	UP	341.923	341.922	341.923	5.28565	5.16773	5.3283	270279	2.27546e+06	493439	3.27224e+06	1.29946e+06			22		M342T5	n
1499		1.54125	-0.624101	-1.22893	0.315801	0.400922	DOWN	362.715	362.715	362.716	29.8998	29.8412	30.0223	274385	5.10705e+06	980018	3.31357e+06	2.33e+06			253		M363T30	n
1500		1.67736	-0.746197	-1.26257	0.315968	0.400941	DOWN	230.986	230.986	230.987	48.9872	48.9762	48.9985	34475.5	135952	22614.5	80786.6	72221.2			81		M231T49	n
1501		3.21457	1.68463	1.2664	0.315997	0.400944	UP	480.31	480.31	480.311	2.80135	2.6833	2.81938	221861	332533	290171	1.06895e+06	964491			219		M480T3	y
1502		1.93255	-0.950509	-1.26712	0.316092	0.400955	DOWN	387.158	387.157	387.158	48.959	48.9472	48.9665	31364.3	77412.2	14668.1	39792.3	49286.9			81		M387T49	y
1503		1.87695	-0.908387	-1.14467	0.316288	0.400977	DOWN	240.995	240.995	240.995	56.3753	56.326	56.4245	40125.6	542255	265646	288638	276954			149		M241T56	y
1504		1.10827	0.148303	1.2203	0.316749	0.401029	UP	238.932	238.932	238.932	8.06424	8.0634	8.06508	452167	3.94371e+06	554810	4.37068e+06	243815		[3M+Cl]- 67.9891 [3M+Cl]- 67.9891	86		M239T8	n
1505		1.61636	0.69275	1.29935	0.316785	0.401033	UP	306.077	306.077	306.078	23.1548	23.041	23.2013	412052	4.49195e+06	648170	7.26061e+06	3.63331e+06		[M+Cl+CF3COOH]- 137.124 [M-H+CF3COOH]- 173.102	33		M306T23	y
1506		1.54528	0.627869	1.18938	0.316925	0.401048	UP	102.933	102.933	102.933	5.8377	5.78172	5.96525	56390.4	172776	66369.6	266988	120075			41		M103T6_2	n
1507		1.19375	-0.255507	-1.2209	0.317047	0.401062	DOWN	194.893	194.893	194.893	11.2084	11.1782	11.2386	704297	1.01776e+07	2.14948e+06	8.52575e+06	933676		[M-H+HCOOH]- 149.895	209		M195T11_1	n
1508		1.75222	0.809182	1.18838	0.317049	0.401062	UP	160.062	160.062	160.062	1.45802	1.41827	1.50504	555646	2.76915e+06	1.47424e+06	4.85215e+06	2.654e+06			7		M160T1	y
1509		1.12631	0.171603	1.27595	0.317068	0.401064	UP	383.115	383.115	383.115	16.6057	16.5734	16.6237	34846.6	362904	15588.2	408742	60238.9			143		M383T17	y
1510		2.31582	1.21152	1.27604	0.31715	0.401073	UP	284.775	284.775	284.776	6.63993	6.52772	6.78243	190359	387361	172576	897056	669975			12		M285T7	n
1511		1.5284	0.612025	1.29374	0.317369	0.401098	UP	214.837	214.836	214.837	6.6215	6.57355	6.73072	402915	3.66879e+06	490525	5.60739e+06	2.5486e+06		[3M+2Cl]2- 119.909	12		M215T7_1	n
1512		2.91126	-1.54165	-1.21637	0.317429	0.401105	DOWN	215.057	215.056	215.057	48.4527	48.436	48.4602	28110.9	113126	96938.5	38593.4	43203.5		[M-H+NaCOOH]- 148.075	104		M215T48_1	n
1513		2.49863	1.32113	1.27288	0.317476	0.40111	UP	435.079	435.079	435.08	2.12757	2.12688	2.14655	43917	52413.8	27316.8	130963	103334			28		M435T2_2	y
1514		2.73575	1.45194	1.19746	0.317559	0.401119	UP	166.023	166.023	166.023	1.44905	1.44724	1.46787	30460.1	49080.8	56204.8	134273	109661	[33][M+1]-		7		M166T1	n
1515		2.14943	1.10395	1.21457	0.317699	0.401135	UP	498.79	498.79	498.79	2.11393	2.08132	2.14655	35301.5	58252.8	39112.2	125210	87107.4			28		M499T2_1	n
1516		1.8512	0.888458	1.29342	0.317782	0.401144	UP	456.701	456.7	456.701	6.59247	6.55128	6.64573	75878	284618	59986	526884	318830		[M-H+NaCOOH]- 389.721	12		M457T7_2	n
1517		1.99628	0.997316	1.25116	0.318646	0.40124	UP	278.854	278.854	278.855	2.11137	2.04458	2.14655	105890	289141	122009	577208	379663			28		M279T2_1	n
1518		1.50274	0.587598	1.26585	0.318699	0.401245	UP	664.874	664.874	664.876	1.71985	1.69182	1.72423	101288	385543	70067.8	579371	255791			5		M665T2	n
1519		1.68407	0.751953	1.1683	0.318704	0.401246	UP	630.822	630.821	630.822	22.5808	22.4112	22.7928	156948	1.64079e+06	885505	2.76321e+06	1.40885e+06			16		M631T23	n
1520		5.75645	-2.52518	-1.26573	0.318723	0.401248	DOWN	145.051	145.051	145.051	0.131257	0.085781	0.340983	31966.6	493716	539031	85284.3	147717			108		M145T0	y
1521		1.65591	0.727622	1.27901	0.31873	0.401249	UP	621.548	621.548	621.55	6.71479	6.69912	6.92375	198470	1.41025e+06	279962	2.33525e+06	1.22096e+06			43		M622T7	y
1522		1.25495	0.327625	1.16553	0.318834	0.40126	UP	170.044	170.044	170.044	5.27202	5.2115	5.30463	93908	1.09554e+06	224195	1.37484e+06	349305			22		M170T5	n
1523		1.71248	-0.776088	-1.16975	0.319254	0.401307	DOWN	114.937	114.936	114.937	56.036	55.8503	56.0893	280830	4.34922e+06	1.40003e+06	2.53945e+06	2.28492e+06			265		M115T56_1	n
1524		2.24085	1.16404	1.28967	0.319535	0.401338	UP	310.052	310.052	310.052	2.09177	2.06668	2.11685	169067	876115	256971	1.96324e+06	1.43724e+06			28		M310T2	y
1525		1.69398	-0.760419	-1.22447	0.319566	0.401341	DOWN	372.902	372.902	372.903	29.3827	29.3652	29.4263	121645	4.00649e+06	856572	2.36486e+06	2.15837e+06		[2M-2H+Na]- 175.964 [M+Cl+NaCOOH]- 269.943	63		M373T29	n
1526		1.15054	-0.202314	-1.27407	0.319581	0.401343	DOWN	114.937	114.937	114.937	16.4389	16.3888	16.489	266236	3.75552e+06	650100	3.26413e+06	153721			207		M115T16	n
1527		1.476	0.561694	1.28451	0.319669	0.401352	UP	470.924	470.923	470.925	6.53794	6.51363	6.62507	442177	1.14175e+06	141928	1.68523e+06	718954		[M-2H+K]- 433.963 [M+Cl]- 435.96	12		M471T7_2	n
1528		2.14826	1.10317	1.28989	0.319761	0.401363	UP	89.0246	89.0245	89.0247	5.33273	5.32797	5.3375	1.41805e+06	3.91357e+06	1.03817e+06	8.40736e+06	5.94424e+06			13		M89T5	y
1529		1.37059	0.454793	1.30335	0.319783	0.401365	UP	98.967	98.9668	98.9671	6.83497	6.63202	7.04992	245535	2.91799e+06	1.42876e+06	3.99936e+06	154248			14		M99T7	n
1530		2.61662	1.3877	1.16764	0.319976	0.401386	UP	220.888	220.887	220.888	5.30772	5.2115	5.3375	48584.7	156272	195848	408905	319499			22		M221T5	y
1531		1.68268	-0.750758	-1.1688	0.320044	0.401394	DOWN	725.379	725.377	725.38	6.39713	6.37252	6.45237	220138	1.02354e+06	319176	608019	526593		[M-H+NaCOOH]- 658.397 [M-H]- 726.386	6		M725T6_2	n
1532		2.4316	1.2819	1.25356	0.32014	0.401404	UP	292.774	292.773	292.774	2.11137	2.07915	2.15012	227304	547351	309437	1.33094e+06	1.03753e+06			28		M293T2	n
1533		2.62509	1.39236	1.26039	0.320558	0.40145	UP	270.813	270.812	270.813	5.27225	5.2115	5.37795	301338	1.37446e+06	804440	3.60807e+06	2.96219e+06			22		M271T5	n
1534		1.46525	0.551146	1.24742	0.320891	0.401486	UP	172.098	172.098	172.098	29.189	28.892	29.2368	472494	1.35363e+07	8.35223e+06	1.98341e+07	2.58964e+06			232		M172T29	y
1535		1.65258	-0.724724	-1.28884	0.32155	0.401558	DOWN	280.984	280.983	280.984	48.9162	48.9063	48.9307	21818.9	54943.4	4432.61	32982.4	29178.2			81		M281T49	y
1536		1.50053	0.585476	1.27181	0.321552	0.401558	UP	642.805	642.803	642.806	6.50922	6.49948	6.60465	60187.2	86045.2	12647.2	129114	57274.4			68		M643T7	n
1537		2.8212	1.49631	1.25445	0.321861	0.401592	UP	354.849	354.849	354.85	6.50107	6.48522	6.59142	223527	340834	228755	961561	825960			68		M355T7_2	n
1538		1.62627	0.701563	1.22323	0.322083	0.401616	UP	650.528	650.527	650.529	6.73212	6.63513	6.99088	235282	1.34969e+06	420611	2.19496e+06	1.12053e+06		[M+Cl]- 615.561 [M-H]- 651.537	43		M651T7_1	n
1539		1.76938	-0.823244	-1.20112	0.322187	0.401627	DOWN	402.012	402.012	402.012	35.3107	35.29	35.3848	10133.7	72603.5	18780.7	40768.7	41889.1			119		M402T35	y
1540		1.88487	-0.914467	-1.13167	0.322734	0.401687	DOWN	172.098	172.098	172.098	54.6635	54.4935	54.6675	1.17973e+06	1.92967e+07	1.06105e+07	1.02374e+07	8.92576e+06			136		M172T55_2	y
1541		1.48467	0.570139	1.27199	0.322807	0.401694	UP	376.905	376.904	376.905	7.14732	7.0683	7.35402	678976	4.529e+06	598374	6.72405e+06	2.92847e+06	[166][M+2]-		73		M377T7	n
1542		1.66432	0.734936	1.20212	0.322841	0.401698	UP	145.051	145.051	145.051	1.47269	1.42104	1.51971	71073.5	455689	174984	758415	399536			7		M145T1	y
1543		1.1504	0.202138	1.28389	0.323108	0.401727	UP	276.799	276.799	276.799	14.4351	14.4138	14.4564	6202701	6.44568e+07	1.93739e+06	7.41513e+07	1.29341e+07			52		M277T14_2	n
1544		2.96243	1.56678	1.23493	0.323164	0.401733	UP	814.484	814.484	814.484	6.93172	6.903	6.96043	25108.3	19832.9	17176.3	59272.7	52582.2		[M+Cl+NaCOOH]- 711.527 [M-H+NaCOOH]- 747.504	147		M814T7	n
1545		1.7529	0.809743	1.18239	0.323245	0.401742	UP	240.877	240.877	240.878	6.1809	6.1412	6.32163	94926.1	611427	304407	1.07177e+06	601729			326		M241T6	n
1546		2.28991	-1.19529	-1.1821	0.324065	0.40183	DOWN	537.901	537.9	537.902	4.47413	4.3579	4.56602	94224.7	436628	322636	190675	160557			100		M538T4	n
1547		2.49591	-1.31957	-1.20204	0.324092	0.401833	DOWN	332.923	332.922	332.923	5.43285	5.31373	5.46443	282963	505551	401787	202552	170837			22		M333T5	y
1548		1.60901	0.686169	1.28113	0.324332	0.401858	UP	364.879	364.878	364.879	7.06557	6.99227	7.28143	874498	5.71534e+06	664638	9.19601e+06	4.6586e+06	[156][M]-		94		M365T7_1	n
1549		1.21384	0.279573	1.14798	0.324782	0.401907	UP	230.104	230.103	230.104	23.2453	23.2425	23.3193	22354.2	70540.9	12365.3	85625	19106.4		[M-H]- 231.111	105		M230T23	y
1550		1.67622	0.74521	1.17194	0.325144	0.401945	UP	764.777	764.775	764.778	7.11982	7.0683	7.36865	119805	330405	153645	553831	292285	[250][M+2]-		73		M765T7_2	n
1551		1.11266	0.15401	1.12538	0.325321	0.401964	UP	162.88	162.88	162.881	6.11154	5.96222	6.23265	45652.1	218061	24173.8	242628	29072.2			196		M163T6	n
1552		1.53091	0.614391	1.21942	0.325968	0.402033	UP	709.486	709.485	709.486	6.70645	6.69198	6.7398	115290	685856	170060	1.04999e+06	488445		[3M+2Cl]2- 449.677 [M+Cl]- 674.516	43		M709T7_2	n
1553		1.911	0.93433	1.12602	0.326283	0.402066	UP	159.986	159.986	159.987	4.50058	4.37488	4.57608	56758	237086	205815	453072	260801			100		M160T5_1	n
1554		1.67086	-0.740591	-1.18802	0.326342	0.402072	DOWN	182.989	182.989	182.989	53.5653	53.3605	53.6782	487445	6.40591e+06	1.54084e+06	3.83364e+06	3.41904e+06			231		M183T54_2	y
1555		1.66221	-0.733104	-1.28403	0.326833	0.402124	DOWN	218.966	218.965	218.966	51.4338	51.4055	51.462	63663.7	1.81726e+06	64821.5	1.09302e+06	974799			95		M219T51	n
1556		1.78998	0.839943	1.21606	0.327141	0.402157	UP	482.816	482.816	482.817	2.08132	2.04458	2.11685	140436	492730	181830	881976	523743			28		M483T2	n
1557		1.64654	-0.719438	-1.22209	0.327595	0.402205	DOWN	240.994	240.994	240.995	48.4824	48.475	48.4965	24305	224053	38399.4	135811	119024			91		M241T48_1	y
1558		1.26473	0.338831	1.12422	0.327634	0.402209	UP	384.841	384.84	384.842	5.54812	5.47295	5.65268	71110.4	595387	148071	753005	192469	[167][M+4]-		21		M385T6_1	n
1559		1.64561	-0.718625	-1.26938	0.327958	0.402243	DOWN	244.986	244.985	244.986	49.0447	49.0362	49.0567	173089	734883	54279.9	446307	389998			250		M245T49	n
1560		2.34286	-1.22827	-1.17399	0.328114	0.402259	DOWN	673.881	673.88	673.882	4.49735	4.34095	4.60653	47405.8	229851	175352	97842.6	84753.5			100		M674T4	n
1561		1.50294	0.587783	1.27194	0.328758	0.402326	UP	237.092	237.091	237.092	6.5273	6.45685	6.6103	29390130	7.77636e+07	5.76496e+06	1.16874e+08	5.29447e+07	[65][M]-	[M-2H+Na]- 216.113	12		M237T7_2	y
1562		1.54449	0.627132	1.24903	0.328799	0.402331	UP	677.511	677.511	677.513	6.72313	6.67787	6.85577	333800	2.01111e+06	319797	3.10614e+06	1.48444e+06	[233][M+1]-		43		M678T7	n
1563		2.00285	1.00205	1.27251	0.328857	0.402337	UP	187.061	187.061	187.062	23.2438	23.225	23.3023	37692.4	93588.3	13078.1	187443	127077		[M-H-CH2]- 202.088	105		M187T23_1	y
1564		1.19198	0.253363	1.21275	0.329365	0.40239	UP	215.104	215.104	215.104	6.53794	6.49948	6.62507	133464	244283	21286.4	291181	63507.5		[M-H]- 216.113	12		M215T7_3	y
1565		1.84181	0.881121	1.21488	0.329507	0.402405	UP	498.907	498.907	498.908	2.10423	2.08132	2.14655	39862.1	150851	56209.3	277838	172099			28		M499T2_2	n
1566		1.38979	-0.474863	-1.26178	0.329896	0.402445	DOWN	246.864	246.864	246.864	22.5093	22.3328	22.574	150374	794223	43722.8	571471	302630			206		M247T23_1	n
1567		1.66841	-0.738477	-1.26835	0.329982	0.402454	DOWN	170.044	170.044	170.044	48.4246	48.4192	48.4527	66926.6	1.02804e+06	58774.6	615916	559724			104		M170T48	n
1568		1.34585	0.428523	1.11237	0.330013	0.402457	UP	225.083	225.083	225.083	6.95537	6.93193	7.13605	35550.7	147401	60744.9	198381	51098.7			94		M225T7	y
1569		1.68981	-0.756864	-1.12255	0.330714	0.40253	DOWN	690.884	690.883	690.885	6.39713	6.36193	6.45237	487562	2.94236e+06	1.07321e+06	1.74123e+06	1.51092e+06		[M-H]- 691.891	6		M691T6_2	n
1570		1.64612	-0.719067	-1.19893	0.331325	0.402593	DOWN	239.093	239.093	239.093	48.449	48.4357	48.6572	38498	290295	56047.5	176087	155181		[3M-H+Cl]2- 148.075	104		M239T48_1	y
1571		1.99244	-0.994536	-1.10834	0.331477	0.402608	DOWN	172.098	172.098	172.098	49.8663	49.836	50.0125	235029	7.81177e+06	3.92373e+06	3.92044e+06	4.64591e+06			140		M172T50	y
1572		1.37948	-0.464123	-1.18507	0.331728	0.402634	DOWN	196.947	196.947	196.948	6.25728	6.1382	6.26502	263234	2.79782e+06	1.04284e+06	2.02817e+06	421719			42		M197T6_2	n
1573		1.84293	-0.882003	-1.17223	0.331853	0.402647	DOWN	264.935	264.934	264.935	5.46275	5.36708	5.49897	694848	2.63061e+06	1.62186e+06	1.42741e+06	728169			22		M265T5	y
1574		1.63557	-0.709795	-1.24064	0.332074	0.40267	DOWN	316.74	316.739	316.74	48.3913	48.3752	48.405	676199	1.14778e+07	1.25716e+06	7.01735e+06	6.09903e+06		[M-H-CO2]- 361.727	104		M317T48	n
1575		1.6395	-0.713252	-1.26777	0.332082	0.402671	DOWN	340.903	340.903	340.903	57.1407	57.1335	57.148	50964.8	625075	14589.5	380996	333145			335		M341T57_2	y
1576		1.50733	0.591993	1.16891	0.332115	0.402674	UP	182.989	182.989	182.989	5.35218	5.1822	5.37795	509087	6.71214e+06	2.10286e+06	1.01174e+07	4.58673e+06			22		M183T5	y
1577		2.15897	-1.11034	-1.19936	0.3323	0.402693	DOWN	306.969	306.969	306.969	5.34113	5.22873	5.37893	346459	2.24581e+06	1.64348e+06	1.04022e+06	574625			13		M307T5_1	y
1578		1.67245	-0.741963	-1.21142	0.332561	0.40272	DOWN	96.9697	96.9696	96.9699	36.4752	36.4528	36.4975	41594.4	783873	132006	468433	431256		[M-H-COCH2]- 139.988	160		M97T36	y
1579		1.91221	0.935243	1.19721	0.332688	0.402733	UP	898.754	898.753	898.757	7.21244	7.08237	7.36865	43197.3	74226.8	32599	141937	92376			25		M899T7	n
1580		1.45848	0.544466	1.21311	0.332893	0.402753	UP	740.85	740.849	740.851	1.69188	1.67758	1.7094	966645	4.17064e+06	776646	6.08279e+06	2.61733e+06	[245][M]-		5		M741T2_1	n
1581		1.52586	0.60962	1.26144	0.333224	0.402787	UP	238.095	238.095	238.095	6.5273	6.45685	6.6103	2479198	6.22359e+06	325053	9.49632e+06	4.48191e+06	[65][M+1]-		12		M238T7	n
1582		1.80954	-0.855627	-1.16742	0.333259	0.402791	DOWN	198.918	198.918	198.919	23.0532	22.8223	23.4347	274660	9.7101e+06	5.87391e+06	5.36605e+06	2.65265e+06		[2M+Cl]- 81.9683 [M+Cl+HCOOH]- 117.942 [M-H+HCOOH]- 153.931	105		M199T23_2	n
1583		1.65182	0.724055	1.20486	0.333292	0.402794	UP	152.036	152.035	152.036	2.72062	2.69742	2.74382	16577.4	55449.1	15865	91591.9	49475.8			82		M152T3	y
1584		1.51164	0.596119	1.19069	0.333293	0.402794	UP	521.914	521.913	521.915	1.72423	1.69182	2.0435	577268	2.35294e+06	606010	3.55681e+06	1.64303e+06	[199][M+1]-		5		M522T2	n
1585		1.34554	0.428188	1.21961	0.333321	0.402797	UP	307.075	307.075	307.076	6.48808	6.44177	6.56383	179238	226229	28879.6	304400	107195	[117][M+2]-		68		M307T6	n
1586		2.60892	-1.38345	-1.19668	0.33333	0.402798	DOWN	180.973	180.973	180.974	4.26044	4.25633	4.26455	3.21144e+06	3.57302e+07	3.01206e+07	1.36954e+07	1.04833e+07			79		M181T4	n
1587		1.78435	-0.835396	-1.22934	0.333736	0.402839	DOWN	158.979	158.978	158.979	27.8082	27.367	28.3515	128415	1.99217e+06	1.20266e+06	1.11647e+06	275480			317		M159T28	n
1588		1.63166	-0.70634	-1.18913	0.33442	0.402909	DOWN	827.36	827.359	827.362	6.41173	6.39665	6.45237	164988	887138	170615	543438	470653		[M+Cl+CF3COOH]- 658.397 [M-H+NaCOOH]- 760.381	6		M827T6_2	y
1589		1.58261	0.662308	1.19345	0.334874	0.402955	UP	646.533	646.533	646.533	6.67208	6.62103	6.72313	142561	1.00146e+06	274724	1.58492e+06	800972			12		M647T7_1	n
1590		2.25613	1.17385	1.1334	0.335033	0.402971	UP	327.043	327.042	327.043	4.51468	4.45948	4.59125	21207.8	38655.9	36923.8	87212.7	64365.1			100		M327T5	y
1591		1.5123	0.596747	1.25013	0.335396	0.403007	UP	239.088	239.087	239.088	6.5273	6.45685	6.6103	1352601	3.05991e+06	225512	4.62752e+06	2.16016e+06	[65][M+2]-		12		M239T7_3	n
1592		1.59546	0.673975	1.20006	0.335458	0.403014	UP	384.936	384.936	384.937	7.29578	7.23385	7.3478	6.86481e+06	8.71779e+07	2.24571e+07	1.39089e+08	7.14792e+07		[2M-2H+Na]- 181.978	25		M385T7_2	n
1593		2.75584	1.46249	1.23635	0.335565	0.403024	UP	308.916	308.916	308.917	2.07742	2.04187	2.11297	32495.1	50692.9	21592.1	139702	122812			28		M309T2	n
1594		2.73602	1.45208	1.17823	0.33569	0.403037	UP	486.786	486.786	486.786	6.99656	6.96173	7.03138	29944.3	30328.8	27797.4	82715.7	71819.4			94		M487T7	n
1595		1.61086	-0.687835	-1.16358	0.335766	0.403044	DOWN	242.065	242.065	242.065	22.3224	22.2	22.3327	147118	4.22942e+06	2.18621e+06	2.62556e+06	959320			24		M242T22	y
1596		1.6158	-0.69225	-1.23346	0.335926	0.403061	DOWN	286.912	286.912	286.913	48.3061	48.2928	48.3097	17296.4	51503.5	5040.7	31610.3	27476			288		M287T48	n
1597		1.6275	-0.70266	-1.2515	0.336063	0.403074	DOWN	193.051	193.051	193.051	48.618	48.6137	48.6533	28774.4	414937	16779.3	254689	221145			91		M193T49_1	y
1598		1.6739	-0.743211	-1.24382	0.336305	0.403099	DOWN	159.011	159.011	159.011	48.4357	48.421	48.4453	18790.2	183404	12829	109303	102388			104		M159T48_2	n
1599		1.24121	0.31175	1.10312	0.336815	0.40315	UP	333.926	333.925	333.926	2.08664	2.05135	2.16135	92065.8	867139	195079	1.0763e+06	264199	[137][M+1]-		28		M334T2_1	n
1600		1.42263	0.508563	1.19482	0.336831	0.403151	UP	628.799	628.798	628.8	7.11305	7.05318	7.32473	191698	726941	134842	1.03417e+06	424466		[M+Cl+CF3COOH]- 459.845 [M-H+CF3COOH]- 495.822 [M-H+NaCOOH]- 561.82	73		M629T7_2	n
1601		3.02521	1.59704	1.2419	0.336855	0.403154	UP	236.718	236.718	236.718	6.50922	6.45685	6.5197	171479	99603.9	35141	301323	279131			68		M237T7_1	n
1602		1.19774	0.26032	1.09744	0.337312	0.403199	UP	268.908	268.908	268.909	5.86355	5.72828	6.04368	37970.3	275020	52964.2	329403	67541.6		[M-H]- 269.917	41		M269T6_2	n
1603		2.01106	1.00795	1.18802	0.337458	0.403214	UP	630.578	630.577	630.579	6.93202	6.8879	6.96043	54643.3	127156	59476.9	255719	177749			147		M631T7_1	n
1604		1.62467	-0.700148	-1.24617	0.337784	0.403246	DOWN	134.976	134.975	134.976	48.3267	48.3077	48.3402	58497.7	631694	24171.7	388549	337082			288		M135T48_2	n
1605		1.62634	-0.701627	-1.22168	0.337893	0.403257	DOWN	259.005	259.005	259.005	48.4827	48.4802	48.4965	31392.1	275406	30472.9	169077	147637			91		M259T48	y
1606		1.57002	0.650783	1.23158	0.337912	0.403259	UP	240.091	240.091	240.091	6.5273	6.45685	6.6103	110606	188892	24250.8	296564	149472	[65][M+3]-		12		M240T7_3	n
1607		3.38835	1.76058	1.24493	0.337915	0.403259	UP	151.015	151.015	151.015	2.44403	2.4063	2.45373	33314.4	27153.9	7129.91	92006.8	89946.8			144		M151T2_1	n
1608		1.2376	0.307546	1.18355	0.338007	0.403268	UP	131.035	131.035	131.035	19.6418	19.493	19.8622	44904	265284	30032.4	328316	87217			67		M131T20	y
1609		2.77249	1.47118	1.23233	0.338067	0.403274	UP	463.945	463.945	463.946	6.4869	6.44032	6.53637	289455	134125	51509.9	371860	330144		[M+Cl+NaCOOH]- 360.989 [M-H+NaCOOH]- 396.965 [M+Cl]- 428.976 [M-H]- 464.952	68		M464T6	y
1610		1.55296	0.635022	1.18193	0.338691	0.403336	UP	290.856	290.856	290.856	6.5738	6.5197	6.6103	204168	746364	196140	1.15907e+06	572119			12		M291T7_3	n
1611		1.22211	0.289374	1.18757	0.339789	0.403444	UP	296.883	296.882	296.883	5.54673	5.47295	5.58315	4.14827e+06	4.63884e+07	4.46756e+06	5.66917e+07	1.43477e+07	[109][M]-	[M-H]- 297.89	21		M297T6	n
1612		2.46135	-1.29945	-1.1527	0.340301	0.403495	DOWN	189.077	189.077	189.077	48.4405	48.421	48.4527	21097.6	92635.3	76271.2	37371.4	32838.5			104		M189T48_1	y
1613		1.59803	0.676293	1.21007	0.340405	0.403505	UP	520.694	520.693	520.694	6.97399	6.91743	7.17893	100811	407044	75188.4	650467	340218			94		M521T7_1	n
1614		1.64251	-0.715903	-1.19767	0.340475	0.403512	DOWN	315.001	315	315.001	49.4798	49.4527	49.4958	39837.9	270184	39604.8	164230	148022			2		M315T49_2	y
1615		1.61897	-0.695077	-1.23867	0.340612	0.403525	DOWN	189.114	189.113	189.114	48.4673	48.4512	48.475	24538.7	241825	6357.89	149105	129496			91		M189T48_2	n
1616		1.95977	0.970682	1.23373	0.340638	0.403528	UP	105.957	105.957	105.957	6.82316	6.53293	6.99088	74737.6	658763	85808.4	1.29102e+06	883477			110		M106T7	n
1617		1.70443	-0.769289	-1.08553	0.340647	0.403529	DOWN	228.995	228.994	228.995	49.2191	48.9907	49.285	44405.7	714614	301244	419005	362937			34		M229T49	y
1618		2.96546	1.56826	1.2007	0.340823	0.403546	UP	430.803	430.803	430.803	2.14432	2.14208	2.14655	26110.9	29993.3	20800.2	88943.9	82455.3			77		M431T2_1	n
1619		2.68836	1.42673	1.09027	0.340904	0.403554	UP	114.031	114.031	114.031	4.81275	4.74778	5.02682	254188	1.12521e+06	1.82699e+06	3.02496e+06	2.40221e+06		[M-H]- 115.039	227		M114T5	n
1620		1.16818	0.224261	1.18035	0.340939	0.403557	UP	248.843	248.843	248.843	19.663	19.5812	19.7448	1.15555e+06	1.47573e+07	1.12429e+06	1.72392e+07	3.46401e+06			67		M249T20_1	n
1621		1.61498	-0.69152	-1.22165	0.340956	0.403559	DOWN	321.996	321.995	321.996	48.5798	48.5688	48.5872	36103.5	105568	9199.39	65103.5	56628.8			91		M322T49_1	y
1622		1.61158	-0.688473	-1.18545	0.341141	0.403577	DOWN	311.187	311.187	311.187	48.405	48.3982	48.4208	20952.3	82912.5	13496.5	51183.5	44350.8	[120][M+2]-		104		M311T48_2	n
1623		1.4078	0.493442	1.13383	0.341241	0.403587	UP	146.032	146.032	146.032	6.55992	6.55692	6.56403	104650	541386	149456	762163	302336		[3M-2H]2- 98.0269	12		M146T7_2	y
1624		1.22691	-0.295025	-1.13679	0.341258	0.403588	DOWN	281.912	281.912	281.912	1.59689	1.58149	1.60673	89349	166984	42387.3	136102	20428.3	[94][M+1]-		23		M282T2	n
1625		1.84041	-0.880029	-1.08222	0.341332	0.403596	DOWN	140.986	140.986	140.986	54.3317	54.3198	54.6635	39737.4	333386	185207	180883	158969			373		M141T54	n
1626		1.65531	0.727103	1.19951	0.341565	0.403618	UP	578.87	578.87	578.871	7.20385	7.15995	7.4125	815292	5.88582e+06	1.34055e+06	9.74288e+06	5.40571e+06		[M+Cl+NaCOOH]- 475.913 [M-H+NaCOOH]- 511.889	25		M579T7_2	n
1627		1.6621	-0.733005	-1.09895	0.342019	0.403662	DOWN	100.842	100.842	100.842	49.4385	49.4115	49.467	468932	2.15314e+06	747808	1.29517e+06	1.12664e+06		[M-2H+K]- 63.8839	2		M101T49_2	n
1628		1.88928	0.917833	1.115	0.34208	0.403668	UP	121.03	121.03	121.03	1.44307	1.41827	1.47578	126796	582792	398492	1.10105e+06	699534			114		M121T1	y
1629		1.76325	0.818237	1.19093	0.342683	0.403727	UP	589.572	589.571	589.573	6.69912	6.63513	6.83497	289355	1.64234e+06	470657	2.89586e+06	1.76127e+06			43		M590T7_1	n
1630		1.70161	-0.766902	-1.20064	0.34308	0.403765	DOWN	651.121	651.12	651.121	32.9808	32.9338	33.05	10201.1	54210.4	7163.72	31593.7	31830.9			292		M651T33	y
1631		1.65834	0.729739	1.13167	0.343209	0.403778	UP	266.804	266.804	266.805	6.61092	6.57355	6.6894	7608293	5.3788e+07	2.34768e+07	8.91988e+07	4.88485e+07		[2M+Cl]- 115.919	12		M267T7	n
1632		1.97723	-0.983483	-1.14434	0.343336	0.40379	DOWN	158.979	158.979	158.979	24.6325	24.4073	24.9465	1.80751e+06	9.33726e+07	2.75548e+07	4.72239e+07	6.41852e+07			103		M159T25_1	n
1633		2.62857	1.39428	1.20219	0.343366	0.403793	UP	170.944	170.944	170.944	2.14431	2.11297	2.17565	43042.6	42160.3	20797.9	110821	96711.5			77		M171T2_1	y
1634		1.65355	-0.725569	-1.20918	0.34337	0.403793	DOWN	98.8484	98.8483	98.8486	49.4115	49.4113	49.4255	1.39809e+06	8.12326e+06	835720	4.91234e+06	4.5228e+06		[M+Cl]- 63.8839	2		M99T49_2	n
1635		1.35884	-0.442372	-1.15623	0.343476	0.403803	DOWN	168.028	168.028	168.028	17.4752	17.3932	17.528	711639	1.38299e+07	5.10775e+06	1.01777e+07	1.9602e+06		[M-H]- 169.035	3		M168T17_1	n
1636		1.63745	0.711448	1.22454	0.343549	0.40381	UP	580.867	580.866	580.868	7.20118	7.18848	7.39375	226180	1.74317e+06	147745	2.85435e+06	1.56475e+06		[3M+Cl]- 181.978 [M+Cl]- 545.894	25		M581T7_2	n
1637		1.79008	-0.840023	-1.07251	0.34424	0.403877	DOWN	228.995	228.994	228.995	57.6725	57.422	58.035	36071.5	783274	410468	437300	379073			256		M229T58_1	y
1638		1.51065	0.595168	1.1821	0.344273	0.40388	UP	876.828	876.826	876.829	1.72083	1.67845	2.02843	401145	1.56957e+06	318631	2.37107e+06	1.13033e+06	[276][M]2-		5		M877T2_1	n
1639		1.62602	-0.701349	-1.12365	0.344378	0.40389	DOWN	100.979	100.979	100.98	49.4385	49.4255	49.4943	79293.7	260338	69351.9	159843	138517		[3M-2H]2- 67.9827	2		M101T49_8	n
1640		1.43193	0.517963	1.20094	0.344498	0.403902	UP	365.035	365.035	365.036	6.51133	6.47117	6.5777	119800	157547	19742.2	225596	96137.9		[M-2H+K]- 328.073	68		M365T7_2	y
1641		1.79575	0.844583	1.10392	0.344626	0.403914	UP	202.072	202.072	202.072	1.45699	1.4522	1.46178	59753.2	190547	121183	342174	204727			7		M202T1	y
1642		1.675	0.744164	1.12583	0.344679	0.403919	UP	224.903	224.903	224.904	16.8968	16.728	16.9808	390942	6.17404e+06	2.81138e+06	1.03415e+07	5.76231e+06			93		M225T17	n
1643		1.63983	-0.713544	-1.17357	0.344772	0.403928	DOWN	339.946	339.946	339.946	48.5632	48.5393	48.5872	12779.1	68377.1	11689.3	41433.2	38009.2			91		M340T49_1	n
1644		1.24053	-0.310957	-1.16798	0.345108	0.40396	DOWN	328.91	328.91	328.911	7.03116	6.96173	7.23647	81831.2	396189	35123.5	319371	108367			94		M329T7_2	y
1645		1.72467	0.786321	1.19268	0.345195	0.403968	UP	281.249	281.249	281.249	2.41788	2.35363	2.45373	67397.2	201636	47667.2	347755	206776			162		M281T2_3	y
1646		2.02608	1.01869	1.21274	0.345569	0.404004	UP	720.614	720.613	720.616	6.57864	6.53627	6.65462	65099.9	89360.9	16915.7	181052	129858		[M-2H+K]- 683.653 [M+Cl]- 685.651 [M-H-CO]- 749.608	12		M721T7	n
1647		2.20044	1.13779	1.20005	0.345599	0.404007	UP	794.429	794.427	794.43	6.71135	6.66942	6.9368	587144	2.40642e+06	794610	5.29519e+06	4.09298e+06			43		M794T7	n
1648		1.83323	0.87439	1.14047	0.34624	0.404068	UP	678.511	678.509	678.512	6.71362	6.61112	7.09288	741251	4.48713e+06	2.16592e+06	8.22596e+06	5.24888e+06	[233][M+2]-		43		M679T7_1	n
1649		1.36064	0.444285	1.1182	0.346261	0.40407	UP	157.037	157.037	157.037	4.78027	4.6756	4.97137	240798	1.97956e+06	496011	2.69347e+06	988331		[M+Cl]- 122.067 [M-H]- 158.044	227		M157T5	y
1650		2.64859	1.40522	1.12594	0.346262	0.40407	UP	388.156	388.156	388.156	2.20935	2.19872	2.21995	116045	67066.8	72543.4	178069	154580			211		M388T2	y
1651		1.57338	0.653864	1.18018	0.346487	0.404091	UP	648.855	648.855	648.857	7.23385	7.21778	7.366	153479	1.25399e+06	269172	1.973e+06	1.02032e+06		[M+Cl+NaCOOH]- 545.894	25		M649T7_4	n
1652		1.62429	0.699809	1.06695	0.346517	0.404094	UP	370.032	370.031	370.032	22.607	22.579	22.7202	119870	1.9954e+06	1.36766e+06	3.24111e+06	1.48962e+06			16		M370T23_3	y
1653		1479.75	10.5311	1.21893	0.347127	0.404152	UP	113.002	112.999	113.004	6.40407	6.35505	6.52235	121868016	224633	301509	3.32401e+08	4.72009e+08			6		M113T6_4	n
1654		1.63668	-0.710775	-1.09695	0.347381	0.404176	DOWN	758.873	758.871	758.874	6.39713	6.38307	6.45237	729576	4.28429e+06	1.33758e+06	2.6174e+06	2.26675e+06		[M+Cl+CF3COOH]- 589.908 [M-H+NaCOOH]- 691.891	6		M759T6_1	n
1655		1.63435	-0.708718	-1.21428	0.347478	0.404185	DOWN	269.14	269.139	269.14	48.565	48.542	48.5872	76254.6	850200	33821.2	519942	469864	[91][M]-		91		M269T49_3	y
1656		1.62302	-0.698677	-1.19447	0.347832	0.404218	DOWN	765.06	765.059	765.06	35.2539	35.2127	35.2952	8445.27	65066.2	6752.08	39825.2	35972.9	[251][M+1]-		119		M765T35	n
1657		1.11018	0.150789	1.06949	0.34788	0.404223	UP	172.098	172.098	172.098	15.0144	14.8824	15.0422	1.28086e+06	2.2845e+07	2.53964e+06	2.5362e+07	3.18846e+06			124		M172T15_1	y
1658		1.61522	-0.691735	-1.20935	0.348677	0.404298	DOWN	194.083	194.082	194.083	48.5725	48.5688	48.5847	2.14644e+06	9.9808e+06	447102	6.17894e+06	5.42669e+06	[53][M]-		91		M194T49_2	y
1659		1.61126	-0.688189	-1.21226	0.348765	0.404306	DOWN	225.15	225.15	225.15	48.4527	48.4192	48.4673	52487.8	496858	12072.1	308102	269422		[M+Cl+NH3]- 173.145	104		M225T48_3	y
1660		1.67791	-0.746666	-1.10503	0.349102	0.404338	DOWN	368.237	368.236	368.237	48.4056	48.3902	48.421	14145.2	46753.7	13985	27599.7	26566.2		[M-H]- 369.244	104		M368T48	n
1661		1.61197	-0.688824	-1.17662	0.349329	0.404359	DOWN	384.034	384.033	384.034	30.5345	30.5163	30.6715	14752.9	83922.8	11205.9	51797.7	45943			272		M384T31	y
1662		1.64289	0.716233	1.11744	0.349348	0.404361	UP	270.798	270.798	270.799	6.6894	6.58672	7.00718	7.79625e+06	5.51976e+07	2.33622e+07	9.06835e+07	4.97956e+07		[M+2Cl]2- 471.66 [M-H+Cl]2- 507.635	43		M271T7_1	n
1663		1.64593	-0.718903	-1.08293	0.349505	0.404375	DOWN	826.859	826.857	826.86	6.39713	6.38307	6.4665	608446	3.50333e+06	1.18628e+06	2.12822e+06	1.85202e+06		[M+Cl+CF3COOH]- 657.896	6		M827T6_1	n
1664		1.46147	0.547421	1.1647	0.350009	0.404422	UP	672.861	672.861	672.863	1.68536	1.66396	1.7094	1355123	5.23155e+06	975205	7.64575e+06	3.45524e+06	[231][M]-		5		M673T2_2	n
1665		1.60813	-0.685388	-1.12047	0.350455	0.404464	DOWN	175.098	175.098	175.098	48.4527	48.4192	48.4673	15935.2	122508	29248.4	75915.8	65818		[M+Cl]- 140.124	104		M175T48_4	y
1666		1.60173	-0.67963	-1.20555	0.350948	0.40451	DOWN	133.051	133.051	133.051	48.4202	48.3982	48.421	36221	450080	9531.99	280732	243121		[M-H-CH2]- 148.075	104		M133T48_3	y
1667		1.68366	0.751605	1.17243	0.351192	0.404532	UP	456.7	456.7	456.701	6.92434	6.84275	7.06082	104406	631215	147592	1.06275e+06	620203			14		M457T7_1	n
1668		1.35512	-0.438416	-1.09707	0.351368	0.404548	DOWN	114.99	114.99	114.99	2.91794	2.77913	3.05675	399316	3.8522e+06	752306	2.84271e+06	1.40506e+06			161		M115T3	n
1669		1.95371	0.966213	1.14418	0.351454	0.404556	UP	443.898	443.898	443.898	7.14242	7.09763	7.14565	123735	459820	215413	898354	627928	[184][M+1]-		73		M444T7	n
1670		1.40037	0.485807	1.11507	0.35194	0.404601	UP	306.92	306.919	306.92	7.14024	7.0683	7.33935	3.9373e+06	3.33384e+07	8.50218e+06	4.6686e+07	1.89097e+07	[119][M]-		73		M307T7_2	n
1671		1.26687	0.341273	1.06428	0.352001	0.404607	UP	549.77	549.769	549.771	5.54673	5.45523	5.58315	69131.1	535079	137959	677877	187016	[208][M+1]-		21		M550T6	n
1672		4.4048	-2.13908	-1.18214	0.352248	0.40463	DOWN	328.941	328.941	328.942	49.6005	49.2717	49.6208	936689	4.02614e+06	4.48726e+06	913771	812380			142		M329T50	y
1673		1.61294	-0.689692	-1.1124	0.352376	0.404641	DOWN	589.903	589.902	589.904	6.39713	6.37252	6.45237	460013	2.6907e+06	660294	1.66793e+06	1.44915e+06	[214][M+1]-		6		M590T6	n
1674		1.51452	0.598863	1.04983	0.353069	0.404705	UP	809.84	809.84	809.844	1.68298	1.67758	1.7094	126135	392270	232514	594101	238366	[260][M+1]-		5		M810T2	n
1675		2.21866	-1.14969	-1.09731	0.353286	0.404725	DOWN	173.007	173.007	173.007	35.1657	35.0923	35.5428	237176	5.01337e+06	3.87209e+06	2.25937e+06	1.97575e+06			119		M173T35	y
1676		2.5155	1.33084	1.15825	0.353326	0.404729	UP	688.538	688.538	688.539	6.94583	6.85775	6.96043	45098.9	77657.9	45709.5	195348	169955			147		M689T7_1	n
1677		1.61309	-0.689826	-1.12576	0.353426	0.404738	DOWN	291.008	291.008	291.008	49.4389	49.4255	49.4527	33698.9	110176	23621.2	68036.9	60377.7	[99][M+5]-		2		M291T49	n
1678		1.66705	-0.737301	-1.05524	0.353462	0.404741	DOWN	268.12	268.119	268.12	48.5123	48.5043	48.5565	16224.6	77303.6	32009.8	46106.8	39967.6			91		M268T49_2	y
1679		2.55178	1.3515	1.12639	0.353482	0.404743	UP	670.692	670.692	670.692	6.98227	6.96173	7.0028	35220.6	27397.6	24035.2	70587.7	61911.6			94		M671T7	n
1680		2.52378	1.33558	1.12048	0.353616	0.404755	UP	719.753	719.752	719.754	7.04845	7.03788	7.05902	32728.4	19340.7	17503.5	49214.7	42733.8			94		M720T7_2	n
1681		1.30042	0.378974	1.04847	0.35363	0.404756	UP	172.098	172.098	172.098	24.7036	24.5263	24.8992	635979	6.19152e+06	2.20066e+06	8.05155e+06	2.14449e+06			103		M172T25_2	y
1682		1.40176	0.48724	1.16481	0.353743	0.404767	UP	412.965	412.965	412.966	6.53794	6.49948	6.62507	626575	1.67319e+06	231030	2.34541e+06	972515	[176][M+2]-		12		M413T7_2	n
1683		1.64091	0.7145	1.19548	0.354016	0.404792	UP	877.829	877.829	877.831	1.69182	1.67912	1.69475	76458.8	207346	8529.17	340237	192348	[276][M+2]2-		5		M878T2	n
1684		2.65315	-1.40771	-1.08566	0.354439	0.40483	DOWN	741.867	741.865	741.868	4.43	4.37488	4.56602	46671.8	183763	159948	69262.2	88239.6			365		M742T4	n
1685		1.38277	0.467556	1.11725	0.354726	0.404856	UP	538.881	538.881	538.882	1.68459	1.6499	1.69182	168658	616821	138896	852919	338641	[203][M+2]-		5		M539T2	n
1686		3.22773	1.69052	1.11818	0.354793	0.404862	UP	183.927	183.927	183.927	4.47413	4.34095	4.57608	65399.5	106139	137709	342587	339382			100		M184T4	y
1687		2.13694	-1.09555	-1.08897	0.354913	0.404873	DOWN	605.89	605.889	605.89	4.44487	4.34095	4.56602	69048.1	350455	262133	163998	138703			100		M606T4	n
1688		1.59623	-0.674672	-1.11693	0.355205	0.4049	DOWN	272.089	272.089	272.09	48.4317	48.405	48.4357	11801.7	56446.4	12458	35097.7	30672.5		[M-H+CF3COOH]- 139.104	104		M272T48	y
1689		1.62852	-0.703566	-1.15705	0.355208	0.4049	DOWN	174.956	174.956	174.957	36.9062	36.904	37.0325	925204	1.87366e+07	2.63939e+06	1.1505e+07	1.04988e+07			168		M175T37_2	y
1690		2.36419	1.24134	1.16036	0.355234	0.404902	UP	759.874	759.873	759.874	1.68631	1.64895	1.72367	55782.1	63867.6	30045	150995	126536	[249][M+1]-		5		M760T2	n
1691		1.30164	0.380331	1.07276	0.355284	0.404907	UP	313.891	313.891	313.892	22.4605	22.3247	22.6327	148145	753935	313349	981352	191400			206		M314T22_1	n
1692		4.34773	2.12026	1.17244	0.355421	0.404919	UP	185.924	185.924	185.924	4.48668	4.44488	4.5608	23759.8	20082.4	17595.3	87048.4	97352.1			100		M186T4	n
1693		1.56994	-0.650707	-1.13021	0.355723	0.404947	DOWN	251.99	251.989	251.99	17.891	17.6898	17.9498	41279.8	483471	88742.3	307956	253918		[M-H-CH4]- 269.033	37		M252T18	y
1694		1.42405	0.51	1.12128	0.355919	0.404964	UP	722.784	722.783	722.785	1.59679	1.58926	1.60672	61463.7	82614.7	19290.4	117647	50560.5			23		M723T2	n
1695		1.58559	-0.665017	-1.14793	0.356299	0.404999	DOWN	237.114	237.113	237.114	48.4357	48.405	48.4453	11380.2	65047.3	9715.04	40759.6	35335.3		[M-H-C4H8]- 294.182	104		M237T48	y
1696		2.97542	1.57309	1.13294	0.356364	0.405004	UP	259.055	259.055	259.055	4.50058	4.47413	4.60653	48192.2	73406.5	69875.4	218415	210391			100		M259T5	y
1697		1.14435	0.194526	1.06608	0.356746	0.405039	UP	196.023	196.023	196.023	26.178	26.1425	26.255	84929.4	825032	103059	944123	163758		[M-2H+Na]- 175.049	245		M196T26	n
1698		1.43494	-0.520989	-1.04488	0.356782	0.405042	DOWN	113.989	113.989	113.989	6.41173	6.39665	6.43108	2.5199e+06	2.21599e+07	7.14036e+06	1.54431e+07	8.54306e+06	[5][M+1]-		6		M114T6	n
1699		1.35612	0.43948	1.04687	0.356873	0.40505	UP	369.954	369.954	369.955	22.5665	22.3763	22.6615	107218	673055	309611	912740	247793			32		M370T23_2	y
1700		1.36946	-0.453603	-1.07133	0.356987	0.40506	DOWN	184.864	184.864	184.864	9.95289	9.93343	10.1064	265853	5.41989e+06	2.03298e+06	3.95769e+06	1.20638e+06			31		M185T10	n
1701		1.58658	0.665917	1.14656	0.357114	0.405072	UP	738.464	738.464	738.464	6.69377	6.63513	6.75242	398851	2.14044e+06	495864	3.39598e+06	1.8307e+06		[M+Cl]- 703.494 [M-H]- 739.471	43		M738T7	n
1702		1.37456	-0.458967	-1.04353	0.357267	0.405086	DOWN	372.937	372.936	372.937	17.4583	17.2747	17.4648	516528	1.16884e+07	3.3977e+06	8.50339e+06	4.05001e+06	[158][M+1]-		3		M373T17	n
1703		1.56441	0.645614	1.10187	0.357267	0.405086	UP	550.803	550.803	550.804	2.09286	2.05135	2.12688	95867.1	448110	161323	701026	363362			28		M551T2	n
1704		1.17256	0.229662	1.07142	0.357365	0.405094	UP	128.96	128.96	128.96	2.11867	2.07098	2.19065	1.88234e+06	2.64999e+07	3.7436e+06	3.10727e+07	6.3744e+06			28		M129T2_2	n
1705		2.12425	1.08695	1.18448	0.357679	0.405123	UP	570.621	570.621	570.623	6.96043	6.85775	7.10173	88587.7	230380	12564.7	489385	378530			94		M571T7_1	n
1706		1.69673	-0.762755	-1.13379	0.357699	0.405124	DOWN	104.044	104.036	104.044	59.8948	59.7172	59.9863	22645.9	183332	34591.2	107786	110104			319		M104T60	n
1707		1.20311	0.266768	1.04312	0.357761	0.40513	UP	172.098	172.098	172.098	25.489	25.1368	25.5745	564472	5.25613e+06	1.36751e+06	6.3237e+06	1.12792e+06			59		M172T25_1	y
1708		1.59259	-0.671371	-1.11516	0.358703	0.405214	DOWN	278.154	278.153	278.154	48.405	48.3752	48.4067	20433.5	99232.8	20283.1	62044.7	54081.6		[M-H-CH3]- 294.182	104		M278T48	y
1709		1.59079	-0.669747	-1.18038	0.358734	0.405217	DOWN	193.087	193.087	193.088	48.6285	48.6153	48.6328	649625	3.08185e+06	81331	1.93704e+06	1.67789e+06			91		M193T49_2	y
1710		1.33657	0.418531	1.13163	0.358878	0.405229	UP	402.908	402.908	402.909	2.0739	2.04458	2.10977	114696	845143	128682	1.12959e+06	415918	[173][M+2]-		28		M403T2_2	n
1711		1.59154	-0.670423	-1.06768	0.359192	0.405257	DOWN	318.953	318.953	318.953	3.36374	3.30125	3.42623	108131	1.1936e+06	361962	749966	622042			83		M319T3	y
1712		1.15274	0.205062	1.08093	0.3592	0.405258	UP	104.954	104.954	104.954	8.0634	7.91082	8.06508	554819	5.83589e+06	1.27053e+06	6.72724e+06	652458			86		M105T8	n
1713		1.58518	-0.664648	-1.16157	0.359356	0.405272	DOWN	294.983	294.982	294.983	48.9872	48.9615	48.9985	31826.2	124766	11916.1	78443.2	68037.8			81		M295T49	y
1714		2.47535	1.30763	1.08605	0.359603	0.405294	UP	100.953	100.953	100.954	6.60672	6.5349	6.61828	187794	461100	473462	1.14138e+06	976162		[M+Cl]- 65.9883	12		M101T7_2	n
1715		1.59116	-0.670081	-1.13093	0.359779	0.405309	DOWN	102.95	102.95	102.951	49.4385	49.4113	49.4392	759324	5.25623e+06	864702	3.30313e+06	2.86351e+06		[M+Cl]- 67.9827	2		M103T49	n
1716		1.36659	-0.450576	-1.06979	0.360031	0.405332	DOWN	250.841	250.84	250.841	16.6955	16.6201	16.7709	298944	9.13463e+06	3.46363e+06	6.68427e+06	1.93459e+06			143		M251T17	n
1717		1.53874	0.62175	1.04448	0.360272	0.405353	UP	245.044	245.043	245.044	11.1023	10.9565	11.3678	592530	5.75062e+06	3.02946e+06	8.84871e+06	4.14932e+06			221		M245T11	y
1718		1.59003	-0.669057	-1.15055	0.360303	0.405356	DOWN	362.052	362.051	362.052	30.5163	30.5	30.656	45109.4	430241	50443.9	270321	235400			272		M362T31	y
1719		1.85975	0.895112	1.04427	0.360327	0.405358	UP	726.656	726.655	726.658	7.01855	6.96173	7.25283	64843.1	96562.8	81246	179583	111176			94		M727T7	n
1720		1.47223	0.557998	1.12495	0.361133	0.405429	UP	164.957	164.957	164.957	22.446	22.295	22.5833	642639	5.13589e+06	1.10643e+06	7.56118e+06	3.56646e+06			217		M165T22_1	n
1721		1.47234	0.558115	1.06159	0.361449	0.405457	UP	298.888	298.887	298.888	7.03145	6.97705	7.26682	1.21001e+06	8.74492e+06	3.39754e+06	1.28755e+07	5.8203e+06			94		M299T7_1	n
1722		1.79176	0.841375	1.10617	0.362014	0.405506	UP	436.86	436.86	436.86	7.07345	7.03788	7.08603	61258.5	259454	112738	464879	301253	[182][M+2]-		73		M437T7	n
1723		1.58942	-0.668502	-1.16361	0.362054	0.40551	DOWN	228.994	228.994	228.995	52.4958	52.1175	52.7558	191849	1.89683e+06	118260	1.19315e+06	1.04076e+06			289		M229T52	y
1724		1.58223	-0.66196	-1.15546	0.362704	0.405566	DOWN	232.036	232.036	232.036	48.4673	48.4512	48.4677	25694.1	281862	23632.2	177878	154072			91		M232T48_2	y
1725		2.96363	1.56737	1.09261	0.362777	0.405573	UP	600.325	600.324	600.325	5.81107	5.70013	5.86667	31212.3	42020.4	50699.8	124533	120577	[216][M+1]-		41		M600T6_2	n
1726		2.82462	1.49806	1.15377	0.363598	0.405644	UP	667.91	667.908	667.911	6.47938	6.44032	6.53637	161837	62063.5	24743.7	175041	167788			68		M668T6	n
1727		1.54618	0.628705	1.09492	0.363974	0.405677	UP	288.779	288.778	288.779	6.77747	6.73832	7.0176	2.23631e+06	1.9449e+07	6.21064e+06	3.00715e+07	1.5614e+07		[M-2H]2- 579.583	19		M289T7_1	n
1728		1.59578	-0.674262	-1.14363	0.364041	0.405683	DOWN	228.799	228.799	228.799	48.3578	48.3245	48.3672	27377.1	201586	21851.1	126060	112279			254		M229T48_1	n
1729		2.14344	1.09993	1.12901	0.364398	0.405713	UP	579.873	579.873	579.873	7.17435	7.15655	7.20385	90659.2	306803	133336	657612	521408			73		M580T7	n
1730		1.47778	0.563427	1.13587	0.364452	0.405718	UP	674.516	674.515	674.518	6.68495	6.62103	6.86952	296704	2.28465e+06	365759	3.37619e+06	1.62379e+06			43		M675T7_1	y
1731		2.4666	1.30253	1.10882	0.364784	0.405747	UP	834.554	834.553	834.555	1.50192	1.49851	1.50533	43829.8	30063.8	21643	73891	64949.8			113		M835T2_1	y
1732		2.08525	1.06022	1.12523	0.364938	0.40576	UP	508.667	508.667	508.668	6.93193	6.8879	7.06082	42276.1	94631.2	40503.5	197330	152805		[M-H]- 509.678	147		M509T7_2	n
1733		1.68362	-0.751563	-1.1337	0.365509	0.405809	DOWN	515.993	515.991	515.993	39.4605	39.4465	39.5612	21897.1	520955	69837.1	309162	315947			287		M516T39	n
1734		1.27462	0.350069	1.12067	0.366125	0.405862	UP	121.03	121.03	121.03	2.36848	2.30232	2.4076	157693	743793	82254.8	948055	304791			162		M121T2	y
1735		2.44983	1.29268	1.07793	0.366384	0.405884	UP	615.089	615.088	615.09	6.52631	6.47117	6.58145	39201.9	16561.2	16008.6	41220.2	36245.1			12		M615T7_2	n
1736		1.60165	-0.679563	-1.05818	0.3666	0.405903	DOWN	725.88	725.879	725.881	6.41173	6.39665	6.45237	280949	1.65886e+06	478604	1.03545e+06	901202	[242][M+1]-		6		M726T6	n
1737		1.33883	0.420972	1.13086	0.366791	0.405919	UP	305.079	305.079	305.08	6.49503	6.45685	6.56383	4530189	6.89185e+06	758160	9.227e+06	3.49531e+06	[117][M]-		68		M305T6	y
1738		3.58291	-1.84113	-1.12774	0.366819	0.405922	DOWN	809.856	809.855	809.857	4.42868	4.32407	4.56602	26300.2	96347.4	103944	26890.8	23986.2			365		M810T4	n
1739		1.53798	0.621033	1.07165	0.367114	0.405947	UP	618.794	618.794	618.795	2.08132	2.03143	2.11685	79797.2	342347	124571	526521	270353			28		M619T2	n
1740		1.33397	0.41573	1.10098	0.367193	0.405953	UP	296.891	296.891	296.891	6.58145	6.52693	6.59142	808144	1.88191e+06	316441	2.51042e+06	936764	[110][M]-	[M-H+CF3COOH]- 163.896	12		M297T7_2	n
1741		1.58718	-0.66647	-1.07338	0.36727	0.40596	DOWN	570.215	570.213	570.215	49.1017	49.0818	49.1165	30002.8	104360	25802.8	65487.2	57174.6			34		M570T49	y
1742		1.60997	-0.687037	-1.15499	0.367302	0.405963	DOWN	224.093	224.093	224.093	48.5192	48.5098	48.5282	37129.2	158485	2444.45	98174.9	90409.6			91		M224T49	y
1743		2.24304	1.16546	1.0343	0.367334	0.405966	UP	270.812	270.812	270.813	0.127529	0.085781	0.250868	407086	3.23795e+06	5.6083e+06	7.26405e+06	3.74213e+06			108		M271T0	n
1744		1.33735	0.419376	1.07843	0.36736	0.405968	UP	282.036	282.036	282.037	10.716	10.5257	10.8365	218291	3.99915e+06	853228	5.34825e+06	1.99171e+06	[97][M]-	[M+Cl+NaCOOH]- 179.08 [M-H+NaCOOH]- 215.056	99		M282T11	y
1745		1.69479	-0.761103	-1.1238	0.367573	0.405986	DOWN	827.861	827.86	827.862	6.42847	6.39665	6.4665	81038.5	370963	54490.4	218620	228386		[M-H+NaCOOH]- 760.882	6		M828T6_2	n
1746		1.75733	-0.813388	-1.14176	0.368115	0.406032	DOWN	214.109	214.109	214.109	56.0183	55.8292	56.3115	25693.5	206920	18548.3	117482	134403			265		M214T56	y
1747		1.22947	-0.29804	-1.06195	0.368267	0.406045	DOWN	281.912	281.912	281.913	5.51607	5.41972	5.81428	60131.1	487039	133061	396136	65396.8	[95][M+1]-		21		M282T6	n
1748		1.25462	0.327247	1.09638	0.368298	0.406047	UP	129.055	129.055	129.055	1.43361	1.40544	1.46178	84877	394539	51627.4	494995	150067		[M-H]- 130.068	9		M129T1	y
1749		1.57434	-0.654746	-1.11963	0.368699	0.406081	DOWN	228.995	228.994	228.995	59.0157	58.8048	59.229	26695.7	321346	42873.5	203851	176636			294		M229T59	y
1750		1.16513	-0.220495	-1.01765	0.369122	0.406117	DOWN	262.88	262.88	262.881	15.171	14.9849	15.3773	87788.9	1.74233e+06	261381	1.49539e+06	329128			336		M263T15	n
1751		1.57395	-0.654389	-1.1461	0.369873	0.40618	DOWN	259.055	259.055	259.055	48.519	48.5043	48.542	16494.7	137714	3835.08	87230.9	76195.4			91		M259T49	y
1752		1.57145	-0.652097	-1.13722	0.369885	0.406181	DOWN	139.023	139.023	139.023	48.7278	48.7167	48.7347	27406.3	130650	9612.45	82875.1	72126	[26][M+1]-		237		M139T49	n
1753		1.26792	0.342467	1.05365	0.370055	0.406196	UP	402.908	402.908	402.909	1.66106	1.64895	1.69182	279940	1.01109e+06	202114	1.28198e+06	396799	[174][M+2]-		5		M403T2_1	n
1754		1.5667	0.647733	1.06624	0.370098	0.406199	UP	162.913	162.912	162.913	6.55128	6.54617	6.58672	249929	1.3176e+06	497775	2.06428e+06	1.10611e+06		[M-H+NaCOOH]- 95.9277	12		M163T7_4	y
1755		1.57663	-0.656844	-1.11999	0.370268	0.406214	DOWN	203.129	203.129	203.129	48.5009	48.4673	48.5393	15277.5	141321	17306.4	89370.2	78454.9			91		M203T49	y
1756		1.40029	0.485726	1.12898	0.370466	0.40623	UP	537.888	537.887	537.889	1.67134	1.66315	1.70465	295759	990838	103423	1.38746e+06	599633	[203][M+1]-		5		M538T2_1	n
1757		1.59288	0.671639	1.04758	0.370614	0.406243	UP	160.062	160.062	160.062	0.249749	0.0902368	0.590933	133641	2.54571e+06	1.1738e+06	4.05501e+06	2.20215e+06			90		M160T0	y
1758		1.16668	0.222412	1.06607	0.37067	0.406247	UP	214.919	214.919	214.92	5.54673	5.47295	5.5662	189323	2.35989e+06	259390	2.75325e+06	584073	[60][M+2]-		21		M215T6	n
1759		2.92333	1.54761	1.13995	0.371318	0.406302	UP	295.228	295.228	295.229	2.90393	2.79263	2.97042	44584	78073.8	17010.1	228236	227523			161		M295T3	y
1760		2.52992	1.33909	1.07683	0.371326	0.406302	UP	660.664	660.664	660.666	7.0047	6.97705	7.0308	41269.8	37536.8	33840.8	95370.1	86649.6			94		M661T7	n
1761		1.57144	-0.652084	-1.13629	0.371358	0.406305	DOWN	148.953	148.953	148.953	49.1572	49.139	49.1722	1.10678e+06	5.55279e+06	330718	3.53331e+06	3.06048e+06			34		M149T49_1	y
1762		1.58964	-0.668703	-1.04619	0.371573	0.406323	DOWN	453.927	453.926	453.928	6.41153	6.37252	6.45237	664928	4.11753e+06	1.17999e+06	2.59022e+06	2.23637e+06	[187][M+1]-		6		M454T6	n
1763		2.15246	1.10599	1.06151	0.371645	0.406329	UP	520.266	520.265	520.267	2.97928	2.91812	3.00055	41448.6	100084	77676.8	215427	171426			277		M520T3	y
1764		1.62856	-0.703598	-1.10187	0.372007	0.406359	DOWN	182.991	182.991	182.991	30.3828	30.2948	30.4302	35342.9	396266	64704.5	243058	231975			329		M183T30	n
1765		1.42174	0.50766	1.05973	0.372138	0.40637	UP	300.922	300.922	300.923	5.24835	5.126	5.37795	163939	1.35869e+06	852351	1.93171e+06	388106			22		M301T5	n
1766		1.62146	-0.69729	-1.02174	0.372157	0.406371	DOWN	521.915	521.914	521.915	3.36374	3.30125	3.42623	165337	1.94666e+06	706711	1.20056e+06	1.04891e+06	[201][M+1]-		83		M522T3	n
1767		1.59558	-0.674081	-1.04024	0.37223	0.406377	DOWN	657.892	657.89	657.892	6.41173	6.39665	6.45237	262898	1.72323e+06	516813	1.07974e+06	938568	[229][M+1]-		6		M658T6	n
1768		1.35538	0.438697	1.05615	0.372615	0.40641	UP	842.835	842.833	842.837	1.68547	1.67845	1.70465	191202	679670	167329	921210	359040			5		M843T2	n
1769		1.40436	0.489916	1.11082	0.372719	0.406418	UP	510.882	510.881	510.883	7.19733	7.1128	7.3979	1.20595e+06	8.65067e+06	1.22546e+06	1.21487e+07	5.31486e+06		[M+Cl]- 475.913 [M-H]- 511.889	25		M511T7_2	n
1770		1.47523	0.56094	1.10284	0.373028	0.406444	UP	530.879	530.878	530.88	6.53961	6.51363	6.62507	199296	440864	83508.4	650376	318272		[M-2H+K]- 493.918 [M+Cl]- 495.915	12		M531T7_2	n
1771		1.58433	0.663876	1.13319	0.373198	0.406458	UP	172.942	172.941	172.942	6.5349	6.50922	6.60465	335701	951951	73734	1.50821e+06	847023			12		M173T7_2	n
1772		1.57372	-0.654175	-1.13389	0.373341	0.40647	DOWN	136.863	136.863	136.863	48.3413	48.3245	48.3513	11561.7	57088.3	2411.15	36011.6	32105			254		M137T48_1	n
1773		1.67936	0.747908	1.00368	0.373405	0.406475	UP	304.116	304.115	304.116	22.4477	22.3327	22.7008	63914.6	558691	495178	938241	428736			217		M304T22	y
1774		1.49635	0.58145	1.08148	0.373426	0.406477	UP	326.893	326.893	326.893	5.61403	5.57002	5.65805	29960.4	348545	90990	521545	261703			21		M327T6	n
1775		1.7141	-0.777455	-1.01103	0.373707	0.4065	DOWN	860.855	860.855	860.855	3.37312	3.28685	3.45938	358855	3.80367e+06	1.61469e+06	2.21904e+06	2.18229e+06			83		M861T3	n
1776		1.72458	0.786246	1.10715	0.373772	0.406505	UP	484.789	484.789	484.79	7.02391	6.97705	7.19723	111150	425623	109787	734022	469811			94		M485T7	n
1777		4.20424	-2.07184	-1.11616	0.373779	0.406506	DOWN	98.9812	98.981	98.9816	49.4592	49.3983	49.4932	1.27979e+06	2.51948e+06	2.92804e+06	599008	555055			2		M99T49_7	n
1778		1.56849	-0.649376	-1.1066	0.37427	0.406546	DOWN	264.817	264.817	264.818	48.8048	48.7853	48.8087	30009	507947	64585.5	323580	281250			204		M265T49_1	n
1779		1.60665	-0.684055	-1.13073	0.374852	0.406594	DOWN	226.995	226.995	226.995	49.6382	49.6242	49.6498	71425.9	284314	9561.09	176696	164572			142		M227T50	y
1780		1.41309	0.498856	1.00001	0.374887	0.406597	UP	718.616	718.615	718.616	6.53854	6.5197	6.59247	48308.3	55573.9	26116.2	78531	29983.6		[M+Cl]- 683.653 [M-H]- 719.627	12		M719T7	n
1781		1.58793	-0.66715	-1.12149	0.375046	0.40661	DOWN	279.164	279.164	279.164	49.0114	49.0077	49.0158	18936.6	50696	3988.14	31661.2	29126			250		M279T49	y
1782		1.5717	-0.652323	-1.1269	0.375475	0.406645	DOWN	118.005	118.005	118.005	49.1735	49.1688	49.1867	184910	843724	38796.5	536559	470516			34		M118T49	n
1783		1.20316	-0.266827	-1.01467	0.375802	0.406672	DOWN	282.907	282.906	282.907	1.5986	1.58926	1.60673	335833	605415	145649	503188	96113.7	[94][M+2]-		23		M283T2	n
1784		1.7395	0.798674	1.0401	0.376378	0.406719	UP	588.681	588.681	588.682	6.99387	6.91743	7.20757	88424.1	272526	149337	474060	300553			94		M589T7_2	n
1785		1.7707	0.824318	1.04354	0.376443	0.406724	UP	332.982	332.982	332.983	24.0134	24.0005	24.0335	33793.1	71826	39707.4	127182	82855.8			18		M333T24	y
1786		1.56019	-0.641721	-1.08374	0.376773	0.406751	DOWN	277.182	277.181	277.182	48.406	48.3902	48.4132	20484.5	95593.1	15880.5	61005.7	52948.1		[2M-H]- 139.104	104		M277T48	y
1787		2.53823	1.34383	1.05945	0.376818	0.406755	UP	690.775	690.775	690.775	7.07345	7.03788	7.10005	34428.1	33644.8	31848.7	85805.3	79104.2			73		M691T7_2	n
1788		1.564	-0.645243	-1.10153	0.376957	0.406766	DOWN	147.067	147.066	147.067	48.4352	48.4192	48.436	103962	1.39073e+06	167699	888949	770977		[M-H]- 148.075	104		M147T48_3	y
1789		1.55821	-0.639887	-1.11799	0.377001	0.40677	DOWN	210.932	210.932	210.932	48.2962	48.2897	48.3097	38376.5	131643	8847.61	84219.1	72937			288		M211T48_1	n
1790		2.15455	1.10739	1.06775	0.377084	0.406776	UP	518.696	518.696	518.696	6.95952	6.903	6.97467	42290.4	97289.3	62331.7	209615	171215			94		M519T7	n
1791		1.26026	0.333718	1.10083	0.377118	0.406779	UP	298.051	298.05	298.051	6.53794	6.49948	6.61828	119246	309622	27092.6	390203	123859	[107][M+3]-		12		M298T7_3	n
1792		2.63991	1.40049	1.12286	0.377121	0.406779	UP	224.903	224.903	224.903	22.2497	22.185	22.3145	2468258	3.18985e+06	591410	8.42092e+06	8.04741e+06			54		M225T22_1	n
1793		3.8602	1.94867	1.10739	0.377194	0.406785	UP	307.016	307.016	307.016	4.50058	4.45948	4.57608	65590.4	58263.8	47182.3	224910	256343			100		M307T5_2	y
1794		1.59315	-0.671884	-1.11551	0.377332	0.406796	DOWN	254.818	254.817	254.818	50.6123	50.5725	50.8552	3911235	1.85096e+08	1.40316e+07	1.16182e+08	1.06078e+08			11		M255T51	n
1795		1.21003	0.275044	1.07532	0.377538	0.406813	UP	380.845	380.844	380.845	5.54673	5.47295	5.58315	2653411	2.65668e+07	2.79253e+06	3.21466e+07	8.54281e+06	[167][M]-	[M-H]- 381.852	21		M381T6	n
1796		1.66812	0.73822	1.09317	0.377581	0.406817	UP	762.779	762.779	762.781	7.12978	7.0683	7.33803	130285	327717	83707.2	546671	336667	[250][M]-	[M+Cl+NaCOOH]- 659.827 [M-H+HCOOH]- 717.78	73		M763T7_3	n
1797		1.04856	-0.0684056	-1.06587	0.377629	0.40682	DOWN	220.065	220.065	220.065	22.0277	21.979	22.1225	36796.9	609195	43051.8	580984	15752			281		M220T22	n
1798		1.58628	0.665651	1.11867	0.377715	0.406827	UP	222.869	222.868	222.869	6.58478	6.53627	6.62507	182699	991054	88307.3	1.57209e+06	895286		[M+Cl+NaCOOH]- 119.909	12		M223T7_2	n
1799		1.53458	-0.617845	-1.01802	0.377819	0.406836	DOWN	316.948	316.948	316.949	3.2523	3.06928	3.45938	6287873	1.05563e+08	3.22306e+07	6.87897e+07	5.36262e+07			44		M317T3_2	y
1800		1.5653	-0.646436	-1.11865	0.377827	0.406836	DOWN	228.995	228.994	228.995	48.482	48.4655	48.4827	101677	804691	42935.8	513817	448318			91		M229T48_2	y
1801		1.59459	-0.673185	-1.01629	0.378105	0.406859	DOWN	345.975	345.974	345.975	49.2255	49.1997	49.2555	377581	5.67476e+06	1.87332e+06	3.55849e+06	3.08205e+06	[148][M+2]-		34		M346T49	n
1802		2.03184	-1.02278	-1.01961	0.37819	0.406866	DOWN	182.989	182.989	182.989	59.9715	59.9102	59.986	187627	1.28017e+06	953589	629790	557935			295		M183T60	y
1803		1.56324	-0.64454	-1.09432	0.378205	0.406867	DOWN	251.129	251.129	251.13	48.4527	48.4453	48.4673	24095.2	181724	23826.5	115984	101287		[M-H+HCOOH]- 206.134	104		M251T48_2	y
1804		1.56334	-0.644628	-1.08651	0.378523	0.406893	DOWN	185.082	185.082	185.082	48.4362	48.4352	48.4527	16193.2	108144	16126.6	68910.5	60428.8			104		M185T48	y
1805		1.65279	0.724904	1.06361	0.378823	0.406917	UP	588.573	588.573	588.573	6.69922	6.69198	6.70645	201693	1.07087e+06	387476	1.76992e+06	1.07041e+06		[M-H]- 589.578	43		M589T7_1	n
1806		1.31628	0.396471	1.0825	0.378842	0.406918	UP	306.083	306.082	306.083	6.49503	6.45685	6.56383	383157	549955	75218.1	723897	267958	[117][M+1]-		68		M306T6	n
1807		1.51144	0.595923	1.00366	0.37977	0.406993	UP	161.046	161.045	161.046	1.44307	1.41827	1.49028	74442.6	477585	235204	721842	349800			114		M161T1_1	y
1808		1.69952	0.765127	1.10284	0.379843	0.406999	UP	171.028	171.028	171.028	2.12133	2.08132	2.16135	75538.1	631711	114339	1.07361e+06	684528			28		M171T2_2	n
1809		1.31562	-0.39574	-1.05234	0.380067	0.407017	DOWN	514.765	514.764	514.765	6.25586	6.25443	6.25728	15086.7	57198.8	8325.94	43476.8	20994.4			42		M515T6	n
1810		1.66011	0.731276	1.08184	0.380105	0.40702	UP	278.83	278.83	278.83	6.54218	6.52288	6.6103	723753	3.25951e+06	892518	5.41114e+06	3.32718e+06			12		M279T7_1	n
1811		1.58673	-0.666061	-0.983905	0.380869	0.407081	DOWN	148.904	148.904	148.905	6.11154	5.96222	6.24532	69765.7	269901	123855	170098	124608			196		M149T6	n
1812		1.76958	0.823405	1.07558	0.380989	0.40709	UP	681.505	681.505	681.505	6.67783	6.66367	6.69198	106317	403727	137284	714427	481130		[M-2H+K]- 644.545	12		M682T7	n
1813		1.3668	-0.450802	-0.999718	0.381147	0.407103	DOWN	158.979	158.979	158.979	26.0137	26.0098	26.0175	584513	7.70487e+06	2.01072e+06	5.63716e+06	2.96489e+06			224		M159T26_2	n
1814		1.5535	-0.635518	-1.08777	0.381545	0.407134	DOWN	150.949	150.948	150.949	49.1595	49.139	49.1722	44850	175956	21706.9	113000	97866			34		M151T49	n
1815		1.2649	-0.339026	-1.02743	0.381575	0.407137	DOWN	276.799	276.799	276.799	8.77072	8.7458	8.79563	3.93301e+06	5.26195e+07	8.24082e+06	4.15997e+07	1.66495e+07			15		M277T9	n
1816		1.55649	-0.638292	-1.10913	0.381622	0.407141	DOWN	119.035	119.035	119.035	48.405	48.3982	48.4208	455672	6.62141e+06	296532	4.25381e+06	3.68541e+06	[12][M]-	[M-H-C2H4]- 148.075	104		M119T48	y
1817		1.62406	-0.699601	-0.992993	0.382085	0.407177	DOWN	691.886	691.885	691.887	6.39713	6.36193	6.48072	61556.3	304458	119649	187203	165874			6		M692T6	n
1818		2.4369	1.28505	1.04973	0.382198	0.407186	UP	812.487	812.487	812.487	6.93893	6.91743	6.96043	25260.4	20296.2	17617.9	50104.4	45919.5			147		M812T7	n
1819		1.56319	-0.644494	-1.08601	0.382526	0.407212	DOWN	349.955	349.954	349.955	49.1572	49.139	49.1722	61058.1	206462	25243.4	131813	116349			34		M350T49	n
1820		1.57523	-0.655566	-1.01671	0.382668	0.407223	DOWN	318.953	318.952	318.953	6.41173	6.38272	6.45237	354996	2.23048e+06	657077	1.41597e+06	1.22216e+06	[128][M+2]-		6		M319T6	n
1821		4.86361	-2.28203	-1.09993	0.383067	0.407255	DOWN	165.041	165.041	165.041	1.33027	1.27073	1.36132	257703	511347	634672	105137	79690.8		[M+Cl]- 130.068	9		M165T1_2	y
1822		1.56103	-0.642499	-1.01643	0.383458	0.407286	DOWN	385.94	385.939	385.94	6.41173	6.39665	6.45237	687843	4.54669e+06	1.30096e+06	2.91262e+06	2.46195e+06	[170][M+1]-		6		M386T6_1	n
1823		2.19608	-1.13493	-1.0266	0.383493	0.407288	DOWN	172.098	172.098	172.098	55.0563	54.936	55.152	1.13768e+06	2.44558e+07	2.02984e+07	1.11359e+07	9.64398e+06			141		M172T55_1	y
1824		1.57619	-0.656445	-1.00814	0.383552	0.407293	DOWN	386.941	386.941	386.941	3.36374	3.30125	3.42623	84395	747084	234025	473980	406684			83		M387T3	n
1825		1.17637	-0.234339	-1.07277	0.383768	0.40731	DOWN	125.9	125.899	125.901	6.99844	6.93172	7.19343	83368.1	556171	34348.9	472787	130173			94		M126T7_1	n
1826		1.45543	0.541443	1.0454	0.383987	0.407327	UP	126.214	126.213	126.216	0.83693	0.809682	0.941737	94308.7	187978	132491	273588	50649			332		M126T1_1	n
1827		1.57619	-0.656438	-1.01173	0.384123	0.407338	DOWN	860.854	860.853	860.855	6.39713	6.38307	6.45237	1.01225e+06	6.11077e+06	1.83208e+06	3.87667e+06	3.35735e+06	[271][M]-	[M+Cl+CF3COOH]- 691.891	6		M861T6_1	n
1828		1.84747	0.885553	1.00413	0.384161	0.407341	UP	165.019	165.019	165.02	1.46399	1.44724	1.48999	376753	1.15131e+06	856955	2.12701e+06	1.44849e+06	[33][M]-		7		M165T1_1	y
1829		1.55286	-0.63493	-1.09846	0.384522	0.407369	DOWN	144.965	144.965	144.965	48.9143	48.9033	48.9203	3.15374e+06	9.51585e+06	550084	6.12768e+06	5.31405e+06			81		M145T49_3	n
1830		1.40809	0.493735	1.05792	0.384817	0.407392	UP	808.839	808.838	808.84	1.69823	1.67845	1.7218	669212	2.93908e+06	594611	4.13847e+06	1.87148e+06	[260][M]-		5		M809T2_1	n
1831		1.42252	0.508453	1.08049	0.384917	0.4074	UP	452.706	452.706	452.707	6.88134	6.64937	7.0176	195552	1.6038e+06	224543	2.28145e+06	1.06282e+06		[M-2H+K]- 415.746	14		M453T7	n
1832		1.57904	0.659051	1.02779	0.38513	0.407417	UP	160.915	160.915	160.916	6.569	6.53293	6.62103	355146	1.96198e+06	784849	3.09806e+06	1.74627e+06		[M-H+HCOOH]- 115.919	12		M161T7_2	n
1833		1.56899	-0.64984	-1.00709	0.385269	0.407427	DOWN	317.952	317.952	317.952	6.4158	6.38272	6.45237	1.13391e+06	6.92465e+06	2.10037e+06	4.41343e+06	3.7738e+06	[128][M+1]-		6		M318T6	n
1834		1.14124	0.190599	1.00521	0.385367	0.407435	UP	175.061	175.061	175.062	23.2584	23.2397	23.3482	30989	101585	21510.2	115933	12185.7		[M+Cl]- 140.092 [M-H-COCH2]- 218.079	30		M175T23	y
1835		2.24581	1.16723	1.07351	0.385801	0.407469	UP	636.613	636.613	636.614	6.94618	6.91743	7.11537	44451	62550.7	28556.8	140212	122005		[2M-2H+K]- 299.829	147		M637T7_1	n
1836		1.45802	-0.544008	-1.06731	0.386614	0.407532	DOWN	280.909	280.908	280.909	5.81428	5.74253	5.99332	1.072e+06	8.02987e+06	3.96826e+06	5.50739e+06	1.00501e+06			41		M281T6_2	n
1837		1.70545	0.770156	1.09598	0.386699	0.407539	UP	782.836	782.836	782.838	7.21837	7.21547	7.4078	349967	1.80603e+06	124443	3.0801e+06	2.00965e+06			25		M783T7	n
1838		1.90001	0.926007	1.00734	0.387372	0.407591	UP	686.497	686.496	686.497	6.66087	6.58672	6.73503	65982.4	135818	97817.6	258055	186030		[M-H]- 687.499	12		M686T7	n
1839		1.83516	0.875909	1.03241	0.387688	0.407615	UP	560.594	560.592	560.594	6.69912	6.61112	7.07845	1.21522e+06	6.65533e+06	3.44703e+06	1.22136e+07	8.66452e+06			43		M561T7_1	n
1840		1.66079	0.731869	1.06894	0.387981	0.407638	UP	619.292	619.292	619.294	5.94018	5.82997	6.0511	132420	545971	129500	906743	570053			297		M619T6_2	n
1841		1.31142	-0.391126	-1.06119	0.388063	0.407644	DOWN	836.651	836.65	836.652	5.51647	5.43752	5.55517	14186.6	63205.8	23688.4	48196.6	6244.5	[267][M+1]-		21		M837T6	n
1842		1.54782	-0.630236	-1.09122	0.388111	0.407648	DOWN	174.077	174.077	174.078	48.4276	48.4192	48.436	1.69507e+06	2.06513e+07	833174	1.3342e+07	1.1572e+07	[37][M]-	[M+Cl]- 139.104	104		M174T48	y
1843		1.54987	-0.632145	-1.09195	0.388201	0.407655	DOWN	130.993	130.992	130.993	49.1735	49.1688	49.1867	49911.2	267096	8721.94	172070	150477			34		M131T49_1	n
1844		1.19441	-0.256302	-0.990637	0.388239	0.407658	DOWN	293.037	293.037	293.038	21.7985	21.7382	21.9303	20231.9	258513	62594.1	216435	38659.2			166		M293T22_2	y
1845		1.30912	-0.388596	-1.08804	0.388288	0.407661	DOWN	323.972	323.972	323.973	0.242428	0.085781	0.337775	215359	4.88842e+06	184416	3.73413e+06	1.82823e+06			90		M324T0	y
1846		1.25317	0.32558	0.997915	0.388333	0.407665	UP	468.897	468.897	468.898	2.04661	2.01808	2.10977	2.01822e+06	1.70631e+07	3.70066e+06	2.13829e+07	6.52088e+06	[190][M]-		28		M469T2_1	n
1847		1.65853	0.729909	1.05822	0.388509	0.407678	UP	464.732	464.732	464.733	6.97332	6.91743	7.20757	127282	593411	167821	984193	617207			94		M465T7	n
1848		2.50076	1.32237	1.00708	0.388529	0.40768	UP	584.644	584.644	584.645	6.93181	6.91743	6.94618	28390.8	17226.5	20567.3	43476.6	40189.9			147		M585T7_1	n
1849		2.31761	1.21264	1.03061	0.388608	0.407686	UP	742.719	742.719	742.721	7.07257	7.00745	7.08603	38363.9	57590.3	46883.9	133472	118596		[3M-2H]2- 495.822	73		M743T7	n
1850		1.41809	0.503953	0.982413	0.388859	0.407705	UP	238.932	238.932	238.932	6.51858	6.4826	6.58145	3341058	4.77746e+06	1.96281e+06	6.77488e+06	2.92384e+06		[M+Cl]- 203.963 [M-H]- 239.939	68		M239T7_1	n
1851		13.1724	3.71945	1.08795	0.389344	0.407742	UP	276.799	276.799	276.799	3.57938	3.53805	3.6207	4.05071e+06	3.73359e+06	4.97587e+06	4.91804e+07	7.21813e+07			70		M277T4_1	n
1852		1.56168	0.643102	1.02618	0.389646	0.407765	UP	309.92	309.92	309.92	7.10235	7.0683	7.12827	52641.3	262342	93075	409695	230639	[119][M+3]-		73		M310T7	n
1853		1.55741	-0.639149	-1.08551	0.389715	0.407771	DOWN	172.911	172.911	172.911	48.475	48.4673	48.482	139919	1.39154e+06	67860.1	893229	792201			91		M173T48_1	n
1854		1.55759	-0.639313	-1.08767	0.389776	0.407775	DOWN	194.989	194.989	194.989	49.171	49.1688	49.1867	70050.9	374830	11724	240383	213777			34		M195T49_1	y
1855		1.39178	0.476936	0.998423	0.389894	0.407784	UP	217.836	217.836	217.836	5.25895	5.19673	5.37795	124713	1.74958e+06	566528	2.43504e+06	1.0455e+06			22		M218T5	n
1856		1.54911	-0.631436	-1.08429	0.389963	0.40779	DOWN	184.864	184.864	184.864	48.5615	48.5393	48.5847	89032.7	1.07374e+06	55278.3	692869	605885			91		M185T49	n
1857		2.03099	-1.02219	-0.975077	0.390022	0.407794	DOWN	326.097	326.097	326.098	22.407	22.3727	22.419	14978.7	90058	47280.7	44341.8	66023.1			24		M326T22	y
1858		1.59451	-0.673114	-1.07794	0.390264	0.407813	DOWN	247.062	247.061	247.062	48.4527	48.4362	48.4673	53509.5	286449	23484.4	179383	170425			104		M247T48_1	y
1859		2.15081	1.10488	1.08447	0.390609	0.407839	UP	164.957	164.957	164.957	22.8853	22.8397	22.9083	634146	8.2798e+06	1.02697e+06	1.78083e+07	1.51837e+07			78		M165T23_2	n
1860		1.226	0.293965	0.97228	0.390621	0.40784	UP	856.763	856.76	856.763	1.60989	1.58926	1.62278	121086	140172	33330.6	171852	45541.1			23		M857T2	n
1861		1.56439	-0.645596	-1.01362	0.390703	0.407846	DOWN	228.994	228.994	228.995	53.5223	53.452	53.5927	77238.7	1.06194e+06	269158	678560	597272			312		M229T54_2	y
1862		1.30918	0.388665	1.07619	0.390737	0.407848	UP	296.054	296.053	296.054	6.53794	6.49948	6.61828	371666	1.05373e+06	73177.3	1.37953e+06	519212	[107][M+1]-		12		M296T7	n
1863		1.31876	-0.399183	-0.979101	0.391073	0.407874	DOWN	892.8	892.8	892.801	2.11273	1.99747	2.228	68547.4	446622	104707	338668	159710			28		M893T2	n
1864		2.46162	1.29961	0.968438	0.391114	0.407877	UP	212.865	212.865	212.865	5.55547	5.40223	5.58315	1.43412e+06	4.5241e+06	7.19099e+06	1.11366e+07	9.38911e+06			21		M213T6_2	n
1865		1.24363	0.314554	1.00397	0.39169	0.407921	UP	116.072	116.072	116.072	5.88658	5.75625	6.08585	434635	5.96755e+06	1.09856e+06	7.4214e+06	2.25482e+06	[9][M]-		41		M116T6	y
1866		1.47649	0.562174	1.04416	0.391987	0.407943	UP	510.665	510.664	510.666	6.9674	6.93193	7.13605	96854.5	401057	89480.8	592157	304107			94		M511T7_1	n
1867		1.55933	-0.640929	-1.01082	0.392033	0.407947	DOWN	101.95	101.95	101.951	49.4385	49.4255	49.4392	105154	815353	205160	522621	457726			2		M102T49_2	n
1868		1.61595	0.692384	1.01298	0.392033	0.407947	UP	760.722	760.721	760.723	6.52288	6.49948	6.5349	71638.1	107439	45368.4	173616	103661			68		M761T7	n
1869		2.20027	1.13768	1.00101	0.392582	0.407988	UP	696.57	696.569	696.57	6.96043	6.903	6.98697	44525.8	62930.1	57635.4	138463	117301			94		M697T7_1	n
1870		1.47175	0.557536	1.04122	0.392631	0.407992	UP	129.963	129.963	129.963	6.22411	6.20978	6.32163	211522	1.3164e+06	296851	1.93741e+06	989483	[21][M+1]-		42		M130T6_1	n
1871		1.61671	-0.693058	-1.0775	0.392659	0.407994	DOWN	448.005	448.005	448.006	39.4607	39.4465	39.5417	41829.4	840675	42519	519727	514161			287		M448T39	y
1872		2.30427	1.20431	0.994528	0.393349	0.408046	UP	548.296	548.296	548.297	2.83287	2.81598	2.83388	35101.5	58013.4	60269.7	133414	116668			75		M548T3	y
1873		1.95193	-0.964903	-1.0503	0.393558	0.408061	DOWN	600.782	600.782	600.782	5.78603	5.77282	5.79925	96780.2	574063	448424	294100	109866			61		M601T6_2	n
1874		1.59127	-0.670176	-0.957506	0.393653	0.408069	DOWN	384.936	384.936	384.937	2.73846	2.49705	2.98977	3.09244e+06	4.85998e+07	2.47591e+07	3.05416e+07	2.13084e+07			82		M385T3_1	n
1875		1.22218	0.289453	0.982069	0.393694	0.408072	UP	383.846	383.846	383.847	5.55499	5.49052	5.65268	45285.2	315997	62743.4	386204	106749	[167][M+3]-		21		M384T6	n
1876		2.26266	1.17802	1.0179	0.393835	0.408082	UP	738.812	738.812	738.813	7.14565	7.09763	7.15655	41209.1	59548.6	46618.8	134474	118663			73		M739T7	n
1877		1.70213	0.767338	0.982482	0.393996	0.408094	UP	175.96	175.959	175.96	29.4247	29.2907	29.6033	152497	2.87104e+06	1.78359e+06	4.88687e+06	3.07378e+06	[39][M+1]-		63		M176T29	n
1878		1.53505	-0.618289	-1.0585	0.394147	0.408106	DOWN	197.082	197.082	197.082	48.4527	48.4512	48.4602	18284.6	155898	16950.3	101294	87727.2			104		M197T48	y
1879		1.55625	-0.63807	-0.999082	0.394366	0.408122	DOWN	146.961	146.961	146.962	30.4928	30.4543	30.5312	94374.6	1.27223e+06	340566	817235	711490			272		M147T30_2	y
1880		1.21688	-0.283183	-1.06878	0.394434	0.408127	DOWN	186.861	186.861	186.861	0.308909	0.138563	0.370453	31158.6	761879	26000.5	626094	218510			47		M187T0	n
1881		1.53583	-0.619015	-1.04323	0.394756	0.408151	DOWN	556.199	556.198	556.199	49.145	49.139	49.1577	29362.8	107713	16040.7	69869.2	60749.3			34		M556T49	y
1882		1.59097	0.66991	1.02049	0.395183	0.408183	UP	591.569	591.568	591.57	6.70804	6.62865	6.8466	360653	1.50049e+06	516084	2.38724e+06	1.41381e+06		[M-H]- 592.573	43		M592T7_1	n
1883		1.62809	0.703182	1.00179	0.395287	0.408191	UP	634.767	634.767	634.769	2.07123	2.06668	2.13508	23211.7	62046.2	27815.5	101017	61368.8			28		M635T2	n
1884		1.45398	0.540007	1.04426	0.395328	0.408194	UP	586.841	586.841	586.842	6.53293	6.51363	6.62507	177828	388661	71399.8	565105	283813			12		M587T7_3	n
1885		1.57236	-0.65293	-0.974585	0.395337	0.408194	DOWN	343.978	343.977	343.978	49.2145	49.1847	49.2723	1.27255e+06	1.94474e+07	6.5787e+06	1.2368e+07	1.07246e+07	[148][M]-		34		M344T49_1	n
1886		1.12867	0.174619	1.07096	0.395366	0.408196	UP	372.936	372.936	372.936	14.4493	14.4423	14.4564	516819	5.76071e+06	83628.5	6.50192e+06	1.19583e+06			52		M373T14_2	n
1887		1.41651	0.50234	0.965251	0.396141	0.408254	UP	314.906	314.906	314.906	22.6532	22.5808	23.0698	1.68676e+06	3.52142e+07	2.1818e+07	4.98813e+07	1.47188e+07			16		M315T23_1	y
1888		1.53811	-0.621159	-1.05893	0.396194	0.408258	DOWN	102.056	102.056	102.056	48.4357	48.4192	48.436	628053	8.1166e+06	716965	5.27673e+06	4.5894e+06		[M-2H]2- 206.134	104		M102T48	y
1889		1.36292	-0.446696	-0.994611	0.396199	0.408258	DOWN	158.979	158.979	158.979	28.7817	28.6012	28.9817	112248	1.28274e+06	536496	941177	256866			324		M159T29_2	n
1890		1.76211	0.817308	0.992826	0.396414	0.408274	UP	279.997	279.997	279.998	6.99593	6.96043	7.16477	23178.7	46264	26864.7	81522.5	55334.1			94		M280T7	y
1891		1.67982	-0.748303	-0.9831	0.396518	0.408282	DOWN	174.956	174.956	174.957	37.7085	37.5693	37.7273	944998	1.90352e+07	6.43944e+06	1.13315e+07	1.19478e+07			164		M175T38_1	y
1892		1.38034	0.46502	0.999789	0.396799	0.408303	UP	308.917	308.916	308.917	7.14732	7.0683	7.32473	1.26369e+06	9.93476e+06	2.65994e+06	1.37133e+07	5.98123e+06	[119][M+2]-		73		M309T7	n
1893		2.9942	1.58217	1.02668	0.396967	0.408315	UP	189.901	189.901	189.901	4.48136	4.45948	4.57608	93312.8	104538	105722	313009	335434			100		M190T4	n
1894		1.29035	-0.367759	-0.958631	0.39718	0.408331	DOWN	116.935	116.934	116.935	7.24906	7.2438	7.25432	58019.5	795476	262774	616482	188523			25		M117T7_1	n
1895		1.36806	-0.452127	-1.00028	0.3972	0.408332	DOWN	293.012	293.012	293.012	4.76158	4.72433	4.97137	20116.6	274081	116982	200344	51162.4		[M+Cl+NaCOOH]- 190.055 [M-H+NaCOOH]- 226.032	227		M293T5_2	n
1896		1.70363	0.768611	1.03994	0.397242	0.408335	UP	734.472	734.47	734.472	6.69198	6.61112	6.90988	389885	2.23911e+06	631285	3.81461e+06	2.54698e+06	[244][M]-	[3M-2H+Na]- 237.828 [M-H-CO]- 763.459	43		M734T7_2	n
1897		1.44297	0.529043	1.03891	0.397357	0.408344	UP	154.881	154.881	154.881	6.66942	6.57355	7.02102	2145730	1.92311e+07	3.46372e+06	2.775e+07	1.37736e+07		[M+Cl]- 119.909	12		M155T7	n
1898		1.31448	-0.39449	-0.967549	0.397814	0.408377	DOWN	197.963	197.963	197.964	4.47308	4.34095	4.59125	89027.5	655724	148533	498848	238336			100		M198T4	y
1899		1.33688	0.418874	1.03464	0.398319	0.408415	UP	604.873	604.872	604.874	1.68536	1.66396	1.7094	2.23044e+06	9.02435e+06	1.28128e+06	1.20645e+07	4.92547e+06	[218][M]-		5		M605T2_2	n
1900		1.44197	0.52804	1.00769	0.398387	0.408419	UP	854.384	854.384	854.384	6.7005	6.67787	6.72313	240090	1.17198e+06	321480	1.68995e+06	830245		[2M+Cl]- 409.71 [M-H-CO]- 883.376	43		M854T7	n
1901		1.62259	-0.698303	-1.06144	0.3984	0.40842	DOWN	276.8	276.799	276.8	0.250868	0.147387	0.322942	2.31389e+06	6.684e+07	3.49484e+06	4.1193e+07	4.17042e+07			90		M277T0	n
1902		1.53086	-0.61434	-1.06159	0.398414	0.408421	DOWN	172.07	172.07	172.07	48.4527	48.4192	48.4673	39579.9	361073	16664	235599	204041	[36][M+1]-		104		M172T48	n
1903		1.53594	-0.619125	-1.05423	0.398536	0.40843	DOWN	292.774	292.773	292.774	48.6918	48.6607	48.7422	114848	1.92694e+06	158022	1.2543e+06	1.09376e+06			322		M293T49_1	n
1904		1.53228	-0.615678	-1.06362	0.398702	0.408443	DOWN	318.738	318.738	318.738	48.3762	48.3595	48.405	310996	4.15636e+06	81291.3	2.71227e+06	2.35021e+06			254		M319T48	n
1905		1.5268	-0.610513	-1.06322	0.398825	0.408452	DOWN	232.925	232.925	232.925	48.2722	48.257	48.2733	19634.5	111857	2290.17	72997.9	63262.7			288		M233T48_1	n
1906		1.5329	-0.616263	-1.04805	0.399054	0.408468	DOWN	307.017	307.017	307.017	56.0989	56.0607	56.1372	27376.1	230649	23091.4	150202	130930			395		M307T56_1	y
1907		1.52992	-0.613456	-1.05593	0.399231	0.408481	DOWN	426.969	426.969	426.97	48.8307	48.816	48.8382	117396	370824	24330.3	242117	209712			204		M427T49_2	y
1908		1.12875	0.174727	0.982228	0.399256	0.408483	UP	129.963	129.963	129.963	5.53922	5.43752	5.5662	668544	8.2275e+06	843714	9.28679e+06	1.66655e+06	[20][M+1]-		21		M130T6_2	n
1909		1.90692	0.931246	0.980008	0.399405	0.408494	UP	503.853	503.852	503.853	7.07069	7.05902	7.08237	34511.1	41665.1	30666.8	79452	59326.8	[197][M+3]-		73		M504T7	n
1910		1.76515	0.819789	0.964279	0.399733	0.408518	UP	296.896	296.895	296.896	22.6073	22.463	22.8258	63890.3	750265	539833	1.32433e+06	878540			16		M297T23	n
1911		2.21839	1.14951	0.98797	0.399745	0.408519	UP	814.702	814.701	814.703	7.07213	7.02257	7.07345	35858.3	43501.8	39235	96239.5	83718.9			73		M815T7	n
1912		1.53014	-0.613665	-1.05943	0.399848	0.408526	DOWN	267.088	267.087	267.088	48.4677	48.4512	48.482	68004.3	662325	21129.9	432588	375001	[88][M]-		91		M267T48_1	y
1913		1.52825	-0.611878	-1.05191	0.399879	0.408528	DOWN	739.065	739.064	739.065	32.1747	32.1662	32.3088	19725.2	128967	9844.82	84124.1	73177.7			98		M739T32	n
1914		1.57351	-0.653984	-1.04381	0.399903	0.40853	DOWN	236.98	236.979	236.98	48.8917	48.8742	48.8998	51130.2	130796	14720.7	82859.2	78169.7			81		M237T49	n
1915		1.42517	0.511132	1.0341	0.400359	0.408563	UP	468.927	468.926	468.927	6.53961	6.51363	6.62507	330332	880047	143708	1.25421e+06	610006		[M+Cl]- 433.963	12		M469T7	n
1916		1.60256	-0.680375	-0.948633	0.400459	0.408571	DOWN	193.024	193.024	193.025	32.1538	32.1197	32.2593	22869.6	87682.4	36375	54449.5	48566.1			96		M193T32_2	n
1917		1.66327	0.734022	0.950324	0.400932	0.408605	UP	352.063	352.063	352.063	24.0292	23.9882	24.039	18540.3	51955.9	36557.2	86416.7	51072.5			17		M352T24	y
1918		3.62741	-1.85894	-1.03854	0.400936	0.408605	DOWN	101.05	101.049	101.05	49.4387	49.3982	49.4392	1.46971e+06	5.21375e+06	6.17275e+06	1.43705e+06	1.25337e+06			2		M101T49_9	n
1919		1.35454	-0.437802	-0.995751	0.40099	0.408609	DOWN	280.908	280.908	280.909	6.24532	6.23502	6.24583	530553	4.23007e+06	1.77954e+06	3.12289e+06	736386			42		M281T6_3	n
1920		1.70096	-0.766348	-0.98688	0.401086	0.408616	DOWN	184.864	184.864	184.864	16.4358	16.0704	16.9863	195312	3.6406e+06	1.09531e+06	2.14032e+06	2.39448e+06			207		M185T16_1	n
1921		1.52982	-0.613366	-1.04731	0.40131	0.408632	DOWN	210.984	210.984	210.984	49.0732	49.0653	49.0993	26549.2	101928	8157.36	66362.6	58250			34		M211T49_1	n
1922		2.06956	1.04932	0.981795	0.401379	0.408637	UP	681.301	681.3	681.301	1.27412	1.24051	1.28676	24559.3	27232.7	22261.5	56359.7	46312.2			9		M681T1	n
1923		1.12264	0.16689	0.948796	0.401718	0.408662	UP	273.992	273.991	273.992	22.8223	22.7202	22.8397	163023	3.66775e+06	476775	4.11755e+06	668521			259		M274T23_1	n
1924		2.14635	1.10188	1.00947	0.401904	0.408675	UP	802.785	802.785	802.786	7.11401	7.08237	7.14565	42009	50867.3	31800.4	108914	94383.7		[M-H]- 803.796	73		M803T7_2	n
1925		1.5446	-0.627231	-1.03744	0.402221	0.408698	DOWN	629.139	629.138	629.139	32.9412	32.8942	33.0647	53684.8	326103	35811.4	210860	189040	[223][M]-		292		M629T33	n
1926		1.09816	-0.135085	-1.05109	0.402245	0.4087	DOWN	114.936	114.936	114.937	11.9243	11.7555	12.0637	352113	4.63131e+06	55492.6	4.21735e+06	679897			159		M115T12	n
1927		1.50148	0.586388	0.993846	0.402366	0.408708	UP	299.043	299.043	299.044	6.53794	6.49948	6.6103	59929.9	110221	36281.7	165495	89236.6	[107][M+4]-		12		M299T7_3	n
1928		1.1869	0.2472	1.03224	0.402763	0.408737	UP	181.977	181.976	181.977	2.11967	2.09605	2.19065	155136	1.75926e+06	114087	2.08807e+06	539804	[46][M+1]-		28		M182T2_1	n
1929		1.59673	-0.675123	-1.03687	0.402824	0.408741	DOWN	120.039	120.039	120.039	48.4166	48.3898	48.4357	22466.7	244943	27627.2	153138	150848	[12][M+1]-		104		M120T48	n
1930		1.13265	0.179703	0.943198	0.402865	0.408744	UP	315.964	315.963	315.964	22.8167	22.7347	23.084	256155	5.271e+06	770357	5.9702e+06	1.02721e+06			259		M316T23_1	y
1931		1.61606	-0.692482	-1.02613	0.403073	0.408759	DOWN	254.818	254.817	254.818	49.1435	48.9287	49.1703	455492	7.91979e+06	1.18992e+06	4.90041e+06	4.95571e+06			34		M255T49	n
1932		2.24136	1.16438	0.968795	0.403102	0.408761	UP	890.721	890.721	890.721	7.07058	7.05318	7.08798	37363.6	43005.4	45086.5	96719.2	84789.7			73		M891T7	n
1933		1.52463	-0.608462	-1.04829	0.403104	0.408761	DOWN	227.093	227.093	227.093	48.421	48.405	48.4357	70090.1	408008	20152.2	267346	231536		[M-H-CH4]- 244.13	104		M227T48_2	y
1934		1.53107	-0.614542	-1.04489	0.403169	0.408766	DOWN	180.99	180.989	180.99	49.0567	49.0508	49.059	56461.8	249916	17029.4	162965	143124			250		M181T49	y
1935		1.68696	-0.754423	-0.992379	0.403544	0.408793	DOWN	432.858	432.858	432.859	5.49348	5.36708	5.81428	208983	949929	626947	563102	250526			21		M433T5	n
1936		2.28163	1.19006	1.02106	0.403678	0.408803	UP	292.774	292.773	292.774	18.8472	18.7957	18.9758	526896	9.57204e+06	5.20247e+06	2.18398e+07	2.01493e+07			226		M293T19	n
1937		1.53833	-0.621366	-0.972075	0.403875	0.408817	DOWN	454.928	454.927	454.929	6.41173	6.39665	6.45237	227847	1.38935e+06	388526	903152	774295	[187][M+2]-		6		M455T6	n
1938		1.23275	0.301884	1.04021	0.404062	0.40883	UP	159.067	159.066	159.067	23.2855	23.2305	23.3023	46348	165970	8769.06	204600	63722.2		[M-2H+Na]- 138.081	30		M159T23_2	y
1939		1.27373	0.34906	1.00963	0.404401	0.408854	UP	401.914	401.913	401.914	1.65738	1.63542	1.67674	329086	979760	134547	1.24795e+06	439976	[174][M+1]-		5		M402T2_1	n
1940		1.15473	-0.207555	-0.945212	0.404468	0.408859	DOWN	248.844	248.843	248.844	28.407	28.0892	28.4683	1.43535e+06	2.21843e+07	4.4917e+06	1.92117e+07	3.08162e+06			58		M249T28	n
1941		1.55604	0.637876	0.974929	0.404633	0.408871	UP	400.91	400.91	400.91	7.37687	7.23385	7.39887	70788.7	614167	260695	955666	547840		[2M-2H+K]- 181.978	25		M401T7	n
1942		1.62096	0.696849	0.990388	0.405119	0.408905	UP	385.939	385.939	385.94	7.43219	7.23385	7.56983	369776	5.29285e+06	2.09037e+06	8.57951e+06	5.35432e+06	[172][M+1]-		60		M386T7	n
1943		1.42621	-0.512189	-0.962984	0.405536	0.408935	DOWN	172.098	172.098	172.098	9.33435	9.18703	9.43238	867522	1.26002e+07	5.97782e+06	8.83476e+06	3.18357e+06			4		M172T9_3	y
1944		1.3264	0.407511	0.96838	0.405668	0.408944	UP	316.948	316.948	316.949	2.06182	2.03143	2.0739	9060043	8.16197e+07	2.1267e+07	1.0826e+08	4.26397e+07	[129][M]-		28		M317T2_2	y
1945		1.52148	-0.605478	-1.03605	0.405682	0.408945	DOWN	93.0096	93.0095	93.0097	49.6355	49.6198	49.6547	26937.7	132266	10287.3	86667.5	75532.8			142		M93T50	n
1946		1.34102	0.423331	0.93882	0.405695	0.408946	UP	294	294	294.001	24.4217	24.3887	24.4548	26028	164237	83620.2	220245	60703.5		[M-H-CH4]- 311.04	66		M294T24	y
1947		1.52109	-0.605101	-1.03871	0.40604	0.408991	DOWN	132.868	132.868	132.868	48.3433	48.3245	48.3578	48690.4	266052	15844.8	174645	151596			254		M133T48_1	n
1948		1.53537	-0.61859	-1.01656	0.406819	0.409094	DOWN	151.077	151.076	151.077	48.4453	48.4362	48.4527	14982.6	77689.3	10843.2	50335	45328.1		[M-H-CO2]- 196.076	104		M151T48_2	y
1949		1.54309	-0.625822	-1.02856	0.406925	0.409107	DOWN	257.979	257.979	257.98	49.4385	49.4255	49.4527	170422	960520	93581	622201	561975		[M-H-C4H8]- 315.049	2		M258T49	y
1950		1.42726	0.513245	0.953923	0.406941	0.409109	UP	767.859	767.858	767.86	1.71494	1.69182	1.73807	59018.9	171564	65923.8	244866	115622	[252][M+1]-		5		M768T2	n
1951		1.53983	-0.622771	-0.962993	0.407612	0.409197	DOWN	724.877	724.876	724.878	6.39713	6.37252	6.45237	2.59984e+06	1.47796e+07	4.19134e+06	9.59817e+06	8.32358e+06	[242][M]-	[M-H+NaCOOH]- 657.896 [M-H]- 725.885	6		M725T6_1	n
1952		1.53172	-0.615156	-1.03097	0.407806	0.409222	DOWN	223.134	223.134	223.135	48.4453	48.436	48.4527	21263.3	134979	10320.2	87857.9	78489.1			104		M223T48	y
1953		1.52056	0.604602	1.00257	0.407932	0.409239	UP	588.839	588.838	588.839	6.53961	6.51363	6.61828	173794	341685	87364.2	519552	294605			12		M589T7_3	n
1954		1.64812	-0.720821	-0.923645	0.407946	0.40924	DOWN	271.192	271.191	271.192	48.4016	48.3902	48.406	18556.6	55813.9	29501.8	33600.7	29407.3			104		M271T48_1	y
1955		1.51961	-0.603698	-1.03352	0.408682	0.409336	DOWN	171.067	171.066	171.067	48.4527	48.4362	48.4673	580357	5.10496e+06	243700	3.35913e+06	2.91562e+06	[36][M]-	[M-H-CH4]- 188.106	104		M171T48	y
1956		1.19471	0.256661	1.01393	0.40921	0.409405	UP	349.025	349.025	349.025	9.58532	9.56478	9.60585	270706	3.3251e+06	237226	3.97253e+06	1.08023e+06			266		M349T10_1	y
1957		1.18877	0.249468	0.946519	0.409267	0.409412	UP	117.02	117.019	117.02	22.4925	22.4172	22.574	137839	1.15946e+06	202197	1.37833e+06	345730			206		M117T22	y
1958		1.52037	-0.604421	-1.01816	0.409707	0.409469	DOWN	228.995	228.995	228.995	50.5438	50.5423	50.5452	121694	745006	79676.4	489752	426853			11		M229T51_2	y
1959		1.64573	-0.718731	-1.02659	0.409762	0.409476	DOWN	299.876	299.875	299.876	50.692	50.628	50.8695	3.73458e+06	1.09619e+08	8.97513e+06	6.66078e+07	7.20112e+07			11		M300T51_1	n
1960		1.21487	0.280802	1.03211	0.409975	0.409503	UP	308.916	308.916	308.917	8.06367	7.91082	8.3053	134290	1.09535e+06	20782.1	1.33071e+06	394423			86		M309T8	n
1961		1.67353	-0.742894	-0.981189	0.41001	0.409508	DOWN	348.897	348.896	348.897	5.46695	5.36708	5.51582	465966	1.62765e+06	1.08209e+06	972585	407736			22		M349T5	n
1962		1.39859	-0.483972	-1.02623	0.410089	0.409518	DOWN	330.868	330.868	330.868	16.7709	16.6978	16.938	41576.9	1.13065e+06	539965	808420	64904.5			93		M331T17_1	n
1963		1.16371	0.218735	1.03238	0.410242	0.409538	UP	253.93	253.93	253.93	9.679	9.62307	9.79417	36182.7	362743	2778.17	422129	99593.8			311		M254T10	n
1964		1.51759	-0.601785	-1.02783	0.410284	0.409543	DOWN	68.9959	68.9958	68.9959	49.6208	49.606	49.6258	139994	1.57988e+06	90104.9	1.04078e+06	903993			142		M69T50	n
1965		1.3844	0.469257	0.98375	0.410346	0.409551	UP	282.824	282.824	282.824	6.9307	6.8879	6.94618	131425	887482	203432	1.22863e+06	565141			147		M283T7_2	n
1966		1.53387	-0.617179	-0.956662	0.411108	0.409649	DOWN	792.866	792.864	792.867	6.39713	6.37252	6.4665	1.8014e+06	1.04862e+07	2.92183e+06	6.83644e+06	5.92693e+06	[256][M]-	[M-H+NaCOOH]- 725.885	6		M793T6_1	n
1967		1.17691	-0.235001	-0.928136	0.41131	0.409675	DOWN	210.866	210.866	210.867	5.9065	5.51607	6.06625	756410	1.79824e+07	4.12062e+06	1.52794e+07	2.90951e+06		[M-H-C6H10O5]- 373.928	41		M211T6	y
1968		1.52208	-0.606041	-1.02377	0.411338	0.409679	DOWN	313.967	313.966	313.967	49.5515	49.5215	49.5825	1.58894e+06	1.34051e+07	868244	8.80685e+06	7.73089e+06			64		M314T50	y
1969		1.21367	0.279373	0.969659	0.411405	0.409687	UP	537.887	537.887	537.888	2.05507	2.02312	2.11685	131101	971736	143116	1.17936e+06	342150	[204][M+1]-		28		M538T2_2	n
1970		1.78644	-0.837085	-0.928743	0.411481	0.409697	DOWN	158.979	158.979	158.979	24.2305	24.0165	24.2607	1.80751e+06	2.60952e+07	1.22304e+07	1.46074e+07	1.759e+07			102		M159T24	n
1971		1.09643	0.132808	0.914327	0.412442	0.40982	UP	270.812	270.812	270.812	12.4103	12.2845	12.5361	496607	6.6281e+06	830456	7.26722e+06	881001			50		M271T12_2	n
1972		1.60572	0.683217	0.982867	0.412598	0.40984	UP	198.041	198.041	198.041	5.3925	5.31247	5.55452	30159.6	75687.3	25790.2	121532	76563.1			22		M198T5_1	y
1973		1.51751	-0.601705	-0.999049	0.413221	0.409919	DOWN	145.051	145.051	145.051	48.4564	48.4362	48.4673	84621.8	974604	137373	641975	560078		[M+Cl]- 110.08	104		M145T48	y
1974		1.51974	-0.603824	-1.02099	0.413517	0.409957	DOWN	372.937	372.937	372.937	48.8306	48.8305	48.8307	378613	1.01929e+07	466959	6.70671e+06	5.89558e+06			204		M373T49	n
1975		2.03718	-1.02657	-0.939089	0.413754	0.409987	DOWN	116.935	116.935	116.935	52.2055	52.1607	52.3798	166316	4.85836e+06	3.9715e+06	2.38459e+06	2.24603e+06			131		M117T52	n
1976		2.03185	1.0228	0.974147	0.414599	0.410094	UP	95.0196	95.0192	95.0202	6.61583	6.55692	6.77708	416173	582468	358522	1.18349e+06	1.00669e+06		[M-H-C4H8]- 152.086	12		M95T7_4	n
1977		1.50127	-0.586186	-1.00057	0.414874	0.410129	DOWN	227.049	227.048	227.049	48.7068	48.6875	48.7168	15313.3	45992.9	5624.39	30371.4	26450.4		[2M-2H+Na]- 103.046	237		M227T49	y
1978		1.67392	0.743235	0.921042	0.414989	0.410143	UP	246.098	246.098	246.099	1.46178	1.4522	1.50504	45991.2	166512	120473	278729	173259			7		M246T1	y
1979		1.55108	-0.633273	-0.936472	0.415025	0.410148	DOWN	341.923	341.923	341.923	23.3313	23.3015	23.3482	3.19228e+06	4.33666e+07	2.48239e+07	2.7959e+07	1.39951e+07	[146][M]-	[M-H-C2H4]- 370.961	30		M342T23_3	n
1980		1.70239	0.76756	0.972966	0.415387	0.410194	UP	282.824	282.824	282.824	6.5253	6.52288	6.52772	77239.4	291964	121344	497036	344307		[M-H-C2H4]- 311.852	68		M283T7_3	n
1981		1.28636	0.363289	0.936885	0.415513	0.410209	UP	282.909	282.909	282.909	24.0363	24.0022	24.1022	639137	3.35362e+06	859636	4.31395e+06	1.5534e+06	[98][M]-		17		M283T24	n
1982		1.30391	-0.38284	-0.977232	0.415889	0.410257	DOWN	327.907	327.907	327.908	7.1075	7.01702	7.23647	2.05669e+06	1.13081e+07	1.44198e+06	8.67249e+06	4.44327e+06		[M-H-CH3]- 343.935	73		M328T7	n
1983		1.36939	0.453537	0.978593	0.41605	0.410277	UP	526.885	526.884	526.885	6.53627	6.51363	6.61828	165727	433639	85316.3	593822	270373			12		M527T7	n
1984		1.50372	-0.588532	-1.01266	0.41629	0.410307	DOWN	345.149	345.148	345.149	48.405	48.3982	48.4067	23843	114824	6066.45	76095.8	65962.8		[M+Cl]- 310.179	104		M345T48	y
1985		2.12301	1.08611	0.96835	0.416792	0.41037	UP	524.278	524.278	524.278	2.77405	2.74223	2.80282	61535.7	137384	93161.6	291668	259761			219		M524T3	y
1986		1.52342	0.607316	0.943314	0.417197	0.410421	UP	307.923	307.923	307.923	7.10235	7.0683	7.14242	154124	1.04218e+06	439777	1.58768e+06	899901	[119][M+1]-		73		M308T7_2	n
1987		1.26306	0.336929	0.954516	0.41754	0.410464	UP	162.882	162.882	162.882	6.56897	6.49948	6.62507	377886	1.50357e+06	278752	1.8991e+06	661392		[M-H]- 163.896	12		M163T7_1	y
1988		1.55964	-0.641209	-0.913046	0.418084	0.410532	DOWN	929.342	929.341	929.344	6.39713	6.38307	6.45237	86305	465377	183611	298123	258754		[M+Cl+CF3COOH]- 760.381	6		M929T6_2	n
1989		1.15635	0.209578	0.967458	0.41841	0.410572	UP	297.886	297.886	297.887	5.53922	5.47295	5.58315	157088	1.79793e+06	163359	2.07904e+06	476018	[109][M+1]-		21		M298T6	n
1990		1.43657	0.52263	0.933196	0.419439	0.4107	UP	355.939	355.938	355.939	2.14174	2.10972	2.17927	175388	488836	182563	702248	351521			28		M356T2	n
1991		16.4525	4.04024	1.00826	0.41948	0.410705	UP	84.9909	84.9907	84.991	6.40409	6.36193	6.47672	2.50069e+06	886716	100336	1.45887e+07	2.35379e+07		[M-H-CO]- 113.993 [M-H-CO]- 113.993	6		M85T6	n
1992		1.50436	-0.589148	-0.972767	0.419573	0.410717	DOWN	139.113	139.113	139.113	48.436	48.4352	48.4453	14410.8	72313.8	12576.6	47805	41787.5		[M-H]- 140.124	104		M139T48_2	y
1993		1.61004	0.687095	0.956049	0.42037	0.410815	UP	908.782	908.781	908.782	7.13638	7.1128	7.15995	67108.2	211096	82488.9	339873	218232			73		M909T7	n
1994		1.68073	-0.749087	-0.907904	0.420881	0.410878	DOWN	270.143	270.143	270.143	48.5943	48.5565	48.6165	13189.6	74201.1	33139.9	43883.6	47402.4	[91][M+1]-		91		M270T49_2	n
1995		1.34855	0.431412	0.993914	0.420883	0.410879	UP	138.02	138.02	138.02	3.16541	3.06452	3.5142	101970	570463	52965.1	769300	342432			44		M138T3	y
1996		1.52475	-0.608575	-0.998052	0.42095	0.410887	DOWN	319.022	319.021	319.022	49.4728	49.3135	49.5253	64463.3	420068	29485.2	275234	249613	[126][M+3]-		2		M319T49	n
1997		1.18391	0.243556	0.962062	0.421357	0.410937	UP	298.881	298.881	298.881	5.54673	5.47295	5.58315	927366	9.95078e+06	1.04456e+06	1.17808e+07	3.12471e+06	[109][M+2]-		21		M299T6	n
1998		1.3874	-0.472382	-0.894117	0.421815	0.410993	DOWN	369.954	369.954	369.955	23.2833	22.9798	23.3038	82521.2	973080	368453	701370	375875		[M-H]- 370.961	30		M370T23_1	y
1999		1.96537	0.974801	0.893628	0.42211	0.411029	UP	102.957	102.957	102.957	14.7959	14.6491	15.03	764352	3.68229e+06	4.97204e+06	7.23707e+06	4.76973e+06			205		M103T15	n
[truncated: 1,527 more rows]
